# Supplementary material for: Genetic Characterization of Rat Hepatic Stellate Cell Line HSC-T6 for In Vitro Cell Line Authentication
Source: MDPI journal article supplement (doi:10.3390/cells11111783), 2022-05-29
Supplement: s1 [file s1]

**Table S2.** Primers used in this study

| Gene              | Forward primer (5'->3')   | Reverse primer (5'->3')  |
|-------------------|---------------------------|--------------------------|
| <i>mActa2</i>     | TGACAGAGGCACCACTGAACC     | TCCAGAGTCCAGCACAATACCAGT |
| <i>rActa2</i>     | GAGGAGCATCCGACCTTGC       | ATTTTCTCCCGGTTGGCC       |
| <i>Fth1</i> *     | TGGAGTTGTATGCCTCCTACG     | TGGAGAAAGTATTTGGCAAAGTT  |
| <i>Col1a1</i> *   | CATGTTCACTTTGTGGACCT      | GCAGCTGACTTCAGGGATGT     |
| <i>mCtgf/Ccn2</i> | TGACCTGGAGGAAAACATTAAGA   | AGCCCTGTATGTCTTCACACTG   |
| <i>rCtgf/Ccn2</i> | GCTGACCTAGAGGAAAACATTAAGA | CCGGTAGGTCTTCACACTGG     |
| <i>rGfap</i>      | TTTCTCCAACCTCCAGATCC      | TCTTGAGGTGGCCTTCTGAC     |
| <i>rTgfb2</i>     | GAGGACGGCCTGAAATCC        | CTCACACACGATCTGGATGC     |
| <i>rTgfb1</i>     | CCTGGAAAGGGCTCAACAC       | CAGTTCTTCTCTGTGGAGCTGA   |
| <i>Gapdh</i> *    | AACCTGCCAAGTATGATGACATCA  | TGTTGAAGTCACAGGAGACAACCT |

\* given primer pair matches mouse and rat gene sequences
