# Supplementary material for: Genetic Characterization of Rat Hepatic Stellate Cell Line HSC-T6 for In Vitro Cell Line Authentication
Source: MDPI journal article supplement (doi:10.3390/cells11111783), 2022-05-29
Supplement: s1 [file s1]

**Table S1.** Publications using or mentioning HSC-T6 cells

| S/N | Year of publication | Reference                                                                                                                                                                                                                                                                                                                                                                                                                         | Origin of publication |
|-----|---------------------|-----------------------------------------------------------------------------------------------------------------------------------------------------------------------------------------------------------------------------------------------------------------------------------------------------------------------------------------------------------------------------------------------------------------------------------|-----------------------|
| 1   | 1998                | Kim Y, Ratziu V, Choi SG, Lalazar A, Theiss G, Dang Q, Kim SJ, Friedman SL. Transcriptional activation of transforming growth factor beta1 and its receptors by the Kruppel-like factor Zf9/core promoter-binding protein and Sp1. Potential mechanisms for autocrine fibrogenesis in response to injury. J Biol Chem. 1998;273(50):33750-8. doi: <a href="https://doi.org/10.1074/jbc.273.50.33750">10.1074/jbc.273.50.33750</a> | USA / Germany         |
| 2   | 1999                | Nieto N, Friedman SL, Greenwel P, Cederbaum AI. CYP2E1-mediated oxidative stress induces collagen type I expression in rat hepatic stellate cells. Hepatology 1999;30(4):987-96. doi: <a href="https://doi.org/10.1002/hep.510300433">10.1002/hep.510300433</a>                                                                                                                                                                   | USA                   |
| 3   | 2000                | Ankoma-Sey V, Wang Y, Dai Z. Hypoxic stimulation of vascular endothelial growth factor expression in activated rat hepatic stellate cells. Hepatology 2000;31(1):141-8. doi: <a href="https://doi.org/10.1002/hep.510310122">10.1002/hep.510310122</a>                                                                                                                                                                            | USA                   |
| 4   | 2000                | Zhang M, Zhang JP, Ji HT, Wang JS, Qian DH. Effect of six flavonoids on proliferation of hepatic stellate cells in vitro. Acta Pharmacol Sin. 2000;21(3):253-6. PMID: <a href="https://pubmed.ncbi.nlm.nih.gov/11324426/">11324426</a>                                                                                                                                                                                            | China                 |
| 5   | 2000                | Vogel S, Piantedosi R, Frank J, Lalazar A, Rockey DC, Friedman SL, Blaner WS. An immortalized rat liver stellate cell line (HSC-T6): a new cell model for the study of retinoid metabolism in vitro. J Lipid Res. 2000;41(6):882-93. PMID: <a href="https://pubmed.ncbi.nlm.nih.gov/10828080/">10828080</a>                                                                                                                       | USA                   |
| 6   | 2000                | Paik J, Vogel S, Piantedosi R, Sykes A, Blaner WS, Swisshelm K. 9-cis-retinoids: biosynthesis of 9-cis-retinoic acid. Biochemistry 2000;39(27):8073-84. doi: <a href="https://doi.org/10.1021/bi992152g">10.1021/bi992152g</a>                                                                                                                                                                                                    | USA                   |
| 7   | 2001                | Bruck R, Genina O, Aeed H, Alexiev R, Nagler A, Avni Y, Pines M. Halofuginone to prevent and treat thioacetamide-induced liver fibrosis in rats. Hepatology 2001;33(2):379-86. doi: <a href="https://doi.org/10.1053/jhep.2001.21408">10.1053/jhep.2001.21408</a>                                                                                                                                                                 | Israel                |
| 8   | 2001                | Zhang JP, Zhang M, Zhou JP, Liu FT, Zhou B, Xie WF, Guo C. Antifibrotic effects of matrine on in vitro and in vivo models of liver fibrosis in rats. Acta Pharmacol Sin. 2001;22(2):183-6. PMID: <a href="https://pubmed.ncbi.nlm.nih.gov/11741525/">11741525</a>                                                                                                                                                                 | Israel                |
| 9   | 2001                | Zhang JP, Zhang M, Jin C, Zhou B, Xie WF, Guo C, Zhang C, Qian DH. Matrine inhibits production and actions of fibrogenic cytokines released by mouse peritoneal macrophages. Acta Pharmacol Sin. 2001;22(8):765-8. PMID: <a href="https://pubmed.ncbi.nlm.nih.gov/11749854/">11749854</a>                                                                                                                                         | China                 |
| 10  | 2001                | Kang LP, Qi LH, Zhang JP, Shi N, Zhang M, Wu TM, Chen J. Effect of genistein and quercetin on proliferation, collagen synthesis, and type I procollagen mRNA levels of rat hepatic stellate cells. Acta Pharmacol Sin. 2001;22(9):793-6. PMID: <a href="https://pubmed.ncbi.nlm.nih.gov/11749858/">11749858</a>                                                                                                                   | China                 |
| 11  | 2001                | Qi LH, Kang LP, Zhang JP, Shi N, Zhang M, Wu TM. [Antifibrotic effects of genistein and quercetin in vitro]. Yao Xue Xue Bao 2001;36(9):648-51. Chinese. PMID: <a href="https://pubmed.ncbi.nlm.nih.gov/12580099/">12580099</a>                                                                                                                                                                                                   | China                 |

|    |      |                                                                                                                                                                                                                                                                                                                                                            |       |
|----|------|------------------------------------------------------------------------------------------------------------------------------------------------------------------------------------------------------------------------------------------------------------------------------------------------------------------------------------------------------------|-------|
| 12 | 2002 | Saxena NK, Ikeda K, Rockey DC, Friedman SL, Anania FA. Leptin in hepatic fibrosis: evidence for increased collagen production in stellate cells and lean littermates of ob/ob mice. <i>Hepatology</i> 2002;35(4):762-71. doi: <a href="https://doi.org/10.1053/jhep.2002.32029">10.1053/jhep.2002.32029</a>                                                | USA   |
| 13 | 2002 | Ding HG, Wang BE, Shang HW. [Effect of herbal compound 861 on expression and activity of nitric oxide synthase in hepatic stellate cells]. <i>Zhongguo Zhong Xi Yi Jie He Za Zhi</i> . 2002;22(5):362-4. Chinese. PMID: <a href="https://pubmed.ncbi.nlm.nih.gov/12584838/">12584838</a>                                                                   | China |
| 14 | 2002 | Yin C, Ma H, Wang A, Ma X, Jia J, Wang B. [Effect of compound 861 on tissue inhibitor of metalloprotenase 1 gene expression of HSC-T6 cells]. <i>Zhonghua Gan Zang Bing Za Zhi</i> . 2002;10(3):197-9. Chinese. PMID: <a href="https://pubmed.ncbi.nlm.nih.gov/12113678/">12113678</a>                                                                     | China |
| 15 | 2002 | During A, Hussain MM, Morel DW, Harrison EH. Carotenoid uptake and secretion by CaCo-2 cells: beta-carotene isomer selectivity and carotenoid interactions. <i>J Lipid Res</i> . 2002;43(7):1086-95. doi: <a href="https://doi.org/10.1194/jlr.m200068-jlr200">10.1194/jlr.m200068-jlr200</a>                                                              | USA   |
| 16 | 2003 | Chen YX, Lu CH, Xie WF, Zhang XR, Zhang ZB, Wei LX, Jin YX, Guo YJ. [Effect of ribozyme against platelet-derived growth factor receptor beta subunit mRNA on the biological characters of hepatic stellate cells]. <i>Zhonghua Gan Zang Bing Za Zhi</i> 2003;11(5):278-81. Chinese. PMID: <a href="https://pubmed.ncbi.nlm.nih.gov/12773241/">12773241</a> | China |
| 17 | 2004 | Zhang G, Zhang FC, Wang TC, Liang KH. [The effects of Chinese national medicine of Huoxueruanjian compound on SMAD signal in hepatic stellate cell and its significance]. <i>Zhonghua Gan Zang Bing Za Zhi</i> 2004;12(4):213-5. Chinese. PMID: <a href="https://pubmed.ncbi.nlm.nih.gov/15099469/">15099469</a>                                           | China |
| 18 | 2004 | Dong MS, Jung SH, Kim HJ, Kim JR, Zhao LX, Lee ES, Lee EJ, Yi JB, Lee N, Cho YB, Kwak WJ, Park YI. Structure-related cytotoxicity and anti-hepatofibrotic effect of asiatic acid derivatives in rat hepatic stellate cell-line, HSC-T6. <i>Arch Pharm Res</i> . 2004;27(5):512-7. doi: <a href="https://doi.org/10.1007/BF02980124">10.1007/BF02980124</a> | Korea |
| 19 | 2004 | Ding HG, Wang BE, Jia JD, Xia HX, Wong CY, Zhao CH, Xu YL. Effects of octreotide on expression of L-type voltage-operated calcium channels and on intracellular Ca <sup>2+</sup> in activated hepatic stellate cells. <i>Chin Med J. (Engl)</i> 2004;117(6):913-6. PMID: <a href="https://pubmed.ncbi.nlm.nih.gov/15198898/">15198898</a>                  | China |
| 20 | 2004 | Abu-Absi SF, Hansen LK, Hu WS. Three-dimensional co-culture of hepatocytes and stellate cells. <i>Cytotechnology</i> 2004;45(3):125-40. doi: <a href="https://doi.org/10.1007/s10616-004-7996-6">10.1007/s10616-004-7996-6</a>                                                                                                                             | USA   |
| 21 | 2004 | Huang J, Hu JH, Qiu L, Cai Z. [Mechanisms of sodium ferulate inhibition of collagen synthesis in hepatic stellate cells]. <i>Yao Xue Xue Bao</i> 2004;39(8):577-80. Chinese. PMID: <a href="https://pubmed.ncbi.nlm.nih.gov/15563055/">15563055</a>                                                                                                        | China |
| 22 | 2004 | Li GM, Shi Y, Li DG, Xie Q, Guo Q, Jin YX. [Effect of small interfering RNA targeting connective tissue growth factor on the synthesis and secretion of extracellular matrix in hepatic stellate cells]. <i>Zhonghua Gan Zang Bing Za Zhi</i> 2004;12(9):526-9. Chinese. PMID: <a href="https://pubmed.ncbi.nlm.nih.gov/15387902/">15387902</a>            | China |
| 23 | 2004 | Wang X, Tang X, Gong X, Albanis E, Friedman SL, Mao Z. Regulation of hepatic stellate cell activation and growth by                                                                                                                                                                                                                                        | USA   |

|    |      |                                                                                                                                                                                                                                                                                                                                                                  |             |
|----|------|------------------------------------------------------------------------------------------------------------------------------------------------------------------------------------------------------------------------------------------------------------------------------------------------------------------------------------------------------------------|-------------|
|    |      | transcription factor myocyte enhancer factor 2. Gastroenterology 2004;127(4):1174-88. doi: <a href="https://doi.org/10.1053/j.gastro.2004.07.007">10.1053/j.gastro.2004.07.007</a>                                                                                                                                                                               |             |
| 24 | 2004 | Fiorucci S, Antonelli E, Rizzo G, Renga B, Mencarelli A, Riccardi L, Orlandi S, Pellicciari R, Morelli A. The nuclear receptor SHP mediates inhibition of hepatic stellate cells by FXR and protects against liver fibrosis. Gastroenterology 2004;127(5):1497-512. doi: <a href="https://doi.org/10.1053/j.gastro.2004.08.001">10.1053/j.gastro.2004.08.001</a> | Italy       |
| 25 | 2005 | Badria FA, Dawidar AA, Houssen WE, Shier WT. In vitro study of flavonoids, fatty acids, and steroids on proliferation of rat hepatic stellate cells. Z Naturforsch C J Biosci. 2005;60(1-2):139-42. doi: <a href="https://doi.org/10.1515/znc-2005-1-225">10.1515/znc-2005-1-225</a>                                                                             | Egypt / USA |
| 26 | 2005 | Hsu YC, Lin YL, Chiu YT, Shiao MS, Lee CY, Huang YT. Antifibrotic effects of Salvia miltiorrhiza on dimethylnitrosamine-intoxicated rats. J Biomed Sci. 2005;12(1):185-95. doi: <a href="https://doi.org/10.1007/s11373-004-8167-7">10.1007/s11373-004-8167-7</a>                                                                                                | Taiwan      |
| 27 | 2005 | Song YH, Zhou XM, Xue XN, Liu NZ, Tian DA, Kong XJ, Wu XL, Lin JS, Jin YX. Effect of ribozyme against transforming growth factorbeta1 on biological character of activated HSCs. IUBMB Life 2005;57(1):31-9. doi: <a href="https://doi.org/10.1080/15216540400024470">10.1080/15216540400024470</a>                                                              | China       |
| 28 | 2005 | Li X, Meng Y, Jiang B, Yang XS, Wang WW, Guo D, Lai ZS, Zhang ZS. [Effects of angiotensin II and aldosterone on NF-kappaB binding activity in hepatic stellate cells]. Zhonghua Yi Xue Za Zhi 2005;85(6):374-80. Chinese. PMID: <a href="https://pubmed.ncbi.nlm.nih.gov/15854525/">15854525</a>                                                                 | China       |
| 29 | 2005 | Song YH, Chen XL, Kong XJ, Liu NZ, Li W, Wu XL, Lin JS, Jin YX. Ribozymes against TGFbeta1 reverse character of activated hepatic stellate cells in vitro and inhibit liver fibrosis in rats. J Gene Med. 2005;7(7):965-76. doi: <a href="https://doi.org/10.1002/jgm.744">10.1002/jgm.744</a>                                                                   | China       |
| 30 | 2005 | Ma H, Ma XM, Yin CH, Jia JD, Wang BE. [Effects of gamma-interferon on gene expression of collagen I, III and on the tissue inhibitor of metalloprotenase 1 in HSC-T6 cells]. Zhonghua Gan Zang Bing Za Zhi 2005;13(7):528-30. Chinese. PMID: <a href="https://pubmed.ncbi.nlm.nih.gov/16042892/">16042892</a>                                                    | China       |
| 31 | 2005 | Li X, Meng Y, Cai SX, Yang XS, Zhang YJ, Wu PS. [Angiotensin II and aldosterone stimulate alpha1-(I) procollagen mRNA expression in hepatic stellate cells via activation of ERK1/2 and AP-1]. Zhonghua Yi Xue Za Zhi 2005;85(26):1831-5. Chinese. PMID: <a href="https://pubmed.ncbi.nlm.nih.gov/16253189/">16253189</a>                                        | China       |
| 32 | 2005 | Li X, Meng Y, Yang XS, Wu PS, Zhang ZS. [Aldosterone stimulating PDGF-B expression in HSC via activation of EGR-1]. Zhonghua Gan Zang Bing Za Zhi 2005;13(8):567-70. Chinese. PMID: <a href="https://pubmed.ncbi.nlm.nih.gov/16092976/">16092976</a>                                                                                                             | China       |
| 33 | 2005 | Chor SY, Hui AY, To KF, Chan KK, Go YY, Chan HL, Leung WK, Sung JJ. Anti- proliferative and pro-apoptotic effects of herbal medicine on hepatic stellate cell. J Ethnopharmacol. 2005;100(1-2):180-6. doi: <a href="https://doi.org/10.1016/j.jep.2005.02.036">10.1016/j.jep.2005.02.036</a>                                                                     | China       |
| 34 | 2005 | Tan Y, Lu ZP, Ou SN, Zhang X. [Experimental study on effect of baoganning on activity of nuclear transcription factor-kappaB in hepatic stellate cells]. Zhongguo Zhong Xi Yi Jie He Za Zhi 2005;25(9):804-7. Chinese. PMID: <a href="https://pubmed.ncbi.nlm.nih.gov/16248243/">16248243</a>                                                                    | China       |
| 35 | 2005 | Zhang Y, Liu Y. [Study on effects of salidroside on lipid peroxidation on oxidative stress in rat hepatic stellate cells]. Zhong Yao Cai 2005;28(9):794-6. Chinese. PMID: <a href="https://pubmed.ncbi.nlm.nih.gov/16447872/">16447872</a>                                                                                                                       | China       |

|    |      |                                                                                                                                                                                                                                                                                                                                            |        |
|----|------|--------------------------------------------------------------------------------------------------------------------------------------------------------------------------------------------------------------------------------------------------------------------------------------------------------------------------------------------|--------|
| 36 | 2005 | Traister A, Breitman I, Bar-Lev E, Zvibel I, Harel A, Halpern Z, Oren R. Nicotinamide induces apoptosis and reduces collagen I and pro-inflammatory cytokines expression in rat hepatic stellate cells. Scand J Gastroenterol. 2005;40(10):1226-34. doi: <a href="https://doi.org/10.1080/00365520510023341">10.1080/00365520510023341</a> | Israel |
| 37 | 2005 | Zhang J, Zhang ZT, Wang Y, Wang P, Li JS, Zhou YZ. [Effect of endothelin-1 and its antagonists on the expression of endothelin receptors mRNA in HSC-T6 cells]. Zhonghua Wai Ke Za Zhi. 2005;43(21):1395-7. Chinese. PMID: <a href="https://pubmed.ncbi.nlm.nih.gov/16318777/">16318777</a>                                                | China  |
| 38 | 2005 | Jiang Y, Li ZS, Jiang FS, Deng X, Yao CS, Nie G. Effects of different ingredients of zedoary on gene expression of HSC-T6 cells. World J Gastroenterol. 2005;11(43):6780-6. doi: <a href="https://doi.org/10.3748/wjg.v11.i43.6780">10.3748/wjg.v11.i43.6780</a>                                                                           | China  |
| 39 | 2006 | Tan Y, Lv ZP, Bai XC, Liu XY, Zhang XF. Traditional Chinese medicine Bao Gan Ning increase phosphorylation of CREB in liver fibrosis in vivo and in vitro. J Ethnopharmacol. 2006;105(1-2):69-75. doi: <a href="https://doi.org/10.1016/j.jep.2005.09.040">10.1016/j.jep.2005.09.040</a>                                                   | China  |
| 40 | 2006 | Liu X, Wang W, Hu H, Tang N, Zhang C, Liang W, Wang M. Smad3 specific inhibitor, naringenin, decreases the expression of extracellular matrix induced by TGF-beta1 in cultured rat hepatic stellate cells. Pharm Res. 2006;23(1):82-9. doi: <a href="https://doi.org/10.1007/s11095-005-9043-5">10.1007/s11095-005-9043-5</a>              | China  |
| 41 | 2006 | Cheng K, Ye Z, Guntaka RV, Mahato RI. Enhanced hepatic uptake and bioactivity of type alpha1(I) collagen gene promoter-specific triplex-forming oligonucleotides after conjugation with cholesterol. J Pharmacol Exp Ther. 2006;317(2):797-805. doi: <a href="https://doi.org/10.1124/jpet.105.100347">10.1124/jpet.105.100347</a>         | USA    |
| 42 | 2006 | Song YH, Xue XL, Zhao Q, Tian DA, Liu NZ, Huang HJ, Lin JS. [Hammerhead ribozyme-mediated cleavage of transforming growth factor beta1 RNA in a cell- free system and in hepatic stellate cells]. Zhonghua Gan Zang Bing Za Zhi 2006;14(2):93-6. Chinese. PMID: <a href="https://pubmed.ncbi.nlm.nih.gov/16494775/">16494775</a>           | China  |
| 43 | 2006 | Chong LW, Hsu YC, Chiu YT, Yang KC, Huang YT. Anti-fibrotic effects of thalidomide on hepatic stellate cells and dimethylnitrosamine-intoxicated rats. J Biomed Sci. 2006;13(3):403-18. doi: <a href="https://doi.org/10.1007/s11373-006-9079-5">10.1007/s11373-006-9079-5</a>                                                             | Taiwan |
| 44 | 2006 | Ye Z, Cheng K, Guntaka RV, Mahato RI. Receptor-mediated hepatic uptake of M6P-BSA-conjugated triplex-forming oligonucleotides in rats. Bioconjug Chem. 2006;17(3):823-30. doi: <a href="https://doi.org/10.1021/bc060006z">10.1021/bc060006z</a>                                                                                           | USA    |
| 45 | 2006 | Lin YL, Lee TF, Huang YJ, Huang YT. Antiproliferative effect of salvianolic acid A on rat hepatic stellate cells. J Pharm Pharmacol. 2006;58(7):933-9. doi: <a href="https://doi.org/10.1211/jpp.58.7.0008">10.1211/jpp.58.7.0008</a>                                                                                                      | Taiwan |
| 46 | 2006 | Lin YL, Lee TF, Huang YJ, Huang YT. Inhibitory effects of Ligusticum chuanxiong on the proliferation of rat hepatic stellate cells. J Gastroenterol Hepatol. 2006;21(8):1257-65. doi: <a href="https://doi.org/10.1111/j.1440-1746.2006.04326.x">10.1111/j.1440-1746.2006.04326.x</a>                                                      | Taiwan |
| 47 | 2006 | Cheng Y, Ping J, Xu HD, Fu HJ, Zhou ZH. Synergistic effect of a novel oxymatrine-baicalin combination against hepatitis B virus replication, alpha smooth muscle actin expression and type I collagen synthesis in vitro. World J Gastroenterol.                                                                                           | China  |

|    |      |                                                                                                                                                                                                                                                                                                                                                                                                                                                       |           |
|----|------|-------------------------------------------------------------------------------------------------------------------------------------------------------------------------------------------------------------------------------------------------------------------------------------------------------------------------------------------------------------------------------------------------------------------------------------------------------|-----------|
|    |      | 2006;12(32):5153-9. doi: <a href="https://doi.org/10.3748/wjg.v12.i32.5153">10.3748/wjg.v12.i32.5153</a>                                                                                                                                                                                                                                                                                                                                              |           |
| 48 | 2006 | Cheng Y, Ping J, Liu C, Tan YZ, Chen GF. Study on effects of extracts from Salvia Miltiorrhiza and Curcuma Longa in inhibiting phosphorylated extracellular signal regulated kinase expression in rat's hepatic stellate cells. Chin J Integr Med. 2006;12(3):207-11. doi: <a href="https://doi.org/10.1007/BF02836524">10.1007/BF02836524</a>                                                                                                        | China     |
| 49 | 2006 | Oh SH, Cho KH, Yang BS, Roh YK. Natural compounds from Danshen suppress the activity of hepatic stellate cells. Arch Pharm Res. 2006;29(9):762-7. doi: <a href="https://doi.org/10.1007/BF02974077">10.1007/BF02974077</a>                                                                                                                                                                                                                            | Korea     |
| 50 | 2006 | Cong M, Wang P, Liu TH, Xu Y, Lu Y, Tang SZ, Liu XM, Wang BE, Jia JD, You H. [Comparison between the suppression of tissue inhibitor of metalloproteinase-1 gene expression by recombinant adeno-associated virus carrying antisense RNA and small interfering RNA (siRNA) of TIMP-1 in rat hepatic stellate cells]. Zhonghua Gan Zang Bing Za Zhi 2006;14(10):742-7. Chinese. PMID: <a href="https://pubmed.ncbi.nlm.nih.gov/17064467/">17064467</a> | China     |
| 51 | 2006 | Zhang C, Zhuo L. Epigallocatechin gallate and genistein attenuate glial fibrillary acidic protein elevation induced by fibrogenic cytokines in hepatic stellate cells. Int J Mol Med. 2006;18(6):1141-51. PMID: <a href="https://pubmed.ncbi.nlm.nih.gov/17089019/">17089019</a>                                                                                                                                                                      | Singapore |
| 52 | 2006 | Zhang C, Zhu Y, Wan J, Xu H, Shi H, Lu X. Effects of Ginkgo biloba extract on cell proliferation, cytokines and extracellular matrix of hepatic stellate cells. Liver Int. 2006;26(10):1283-90. doi: <a href="https://doi.org/10.1111/j.1478-3231.2006.01378.x">10.1111/j.1478-3231.2006.01378.x</a>                                                                                                                                                  | China     |
| 53 | 2007 | Maubach G, Lim MC, Kumar S, Zhuo L. Expression and upregulation of cathepsin S and other early molecules required for antigen presentation in activated hepatic stellate cells upon IFN-gamma treatment. Biochim Biophys Acta 2007;1773(2):219-31. doi: <a href="https://doi.org/10.1016/j.bbamcr.2006.11.005">10.1016/j.bbamcr.2006.11.005</a>                                                                                                       | Singapore |
| 54 | 2007 | Gui M, Zhang YF, Xiao ZY, Sun P, Dai JF, Wang SF, Rui YC, Zhang JP. Inhibitory effect of emodin on tissue inhibitor of metalloproteinases-1 (TIMP-1) expression in rat hepatic stellate cells. Dig Dis Sci. 2007;52(1):200-7. doi: <a href="https://doi.org/10.1007/s10620-006-9321-z">10.1007/s10620-006-9321-z</a>                                                                                                                                  | China     |
| 55 | 2007 | Hsu YC, Chiu YT, Cheng CC, Wu CF, Lin YL, Huang YT. Antifibrotic effects of tetrandrine on hepatic stellate cells and rats with liver fibrosis. J Gastroenterol Hepatol. 2007;22(1):99-111. doi: <a href="https://doi.org/10.1111/j.1440-1746.2006.04361.x">10.1111/j.1440-1746.2006.04361.x</a>                                                                                                                                                      | Taiwan    |
| 56 | 2007 | de Villiers WJ, Song Z, Nasser MS, Deaciuc IV, McClain CJ. 4-Hydroxynonenal- induced apoptosis in rat hepatic stellate cells: mechanistic approach. J Gastroenterol Hepatol. 2007;22(3):414-22. doi: <a href="https://doi.org/10.1111/j.1440-1746.2006.04625.x">10.1111/j.1440-1746.2006.04625.x</a>                                                                                                                                                  | USA       |
| 57 | 2007 | Bruck R, Ashkenazi M, Weiss S, Goldiner I, Shapiro H, Aeed H, Genina O, Helpert Z, Pines M. Prevention of liver cirrhosis in rats by curcumin. Liver Int. 2007;27(3):373-83. doi: <a href="https://doi.org/10.1111/j.1478-3231.2007.01453.x">10.1111/j.1478-3231.2007.01453.x</a>                                                                                                                                                                     | Israel    |
| 58 | 2007 | Luk JM, Zhang QS, Lee NP, Wo JY, Leung PP, Liu LX, Hu MY, Cheung KF, Hui CK, Lau GK, Fan ST. Hepatic stellate cell-targeted delivery of M6P-HSA- glycyrrhetic acid attenuates hepatic fibrogenesis in a bile duct ligation rat model. Liver Int.                                                                                                                                                                                                      | China     |

|    |      |                                                                                                                                                                                                                                                                                                                                          |        |
|----|------|------------------------------------------------------------------------------------------------------------------------------------------------------------------------------------------------------------------------------------------------------------------------------------------------------------------------------------------|--------|
|    |      | 2007;27(4):548-57. doi: 10.1111/j.1478-3231.2007.01452.x                                                                                                                                                                                                                                                                                 |        |
| 59 | 2007 | Wang LT, Ma H, Zhang P, Jia JD. [Effects of rat recombinant leptin on gene expression of collagen I and tissue inhibitor of metalloproteinase 1 in HSC-T6 cells]. Zhonghua Gan Zang Bing Za Zhi 2007;15(5):394-5. Chinese. PMID: 17524281                                                                                                | China  |
| 60 | 2007 | Lee TF, Lin YL, Huang YT. Studies on antiproliferative effects of phthalides from Ligusticum chuanxiong in hepatic stellate cells. Planta Med. 2007;73(6):527-34. doi: 10.1055/s-2007-981520                                                                                                                                             | Taiwan |
| 61 | 2007 | Tajima K, Terai S, Takami T, Kawaguchi K, Okita K, Sakaida I. Importance of inhibitor of DNA binding/differentiation 2 in hepatic stellate cell differentiation and proliferation. Hepatol Res. 2007;37(8):647-55. doi: 10.1111/j.1872-034X.2007.00089.x                                                                                 | Japan  |
| 62 | 2007 | Li Y, Wu W, Jiang YF, Wang KK. [Effect of heat shock protein 47 on the expression of collagen I induced by TGF-beta(1) in hepatic stellate cell-T6 cells]. Zhong Nan Da Xue Xue Bao Yi Xue Ban 2007;32(4):650-5. Chinese. PMID: 17767059                                                                                                 | China  |
| 63 | 2007 | Qu Z, Lou D, Pan Y. The role of IkappaBalpha in TNF-alpha-induced apoptosis in hepatic stellate cell line HSC-T6. J Huazhong Univ Sci Technolog Med Sci. 2007;27(4):407-10. doi: 10.1007/s11596-007-0414-5                                                                                                                               | China  |
| 64 | 2007 | Fan RH, Chen PS, Zhao D, Zhang WD. [Hypoxia induced by CoCl2 influencing the expression and the activity of matrix metalloproteinase-2 in rat hepatic stellate cells]. Zhonghua Gan Zang Bing Za Zhi 2007;15(9):654-7. Chinese. PMID: 17903365                                                                                           | China  |
| 65 | 2007 | Ye Z, Guntaka RV, Mahato RI. Sequence-specific triple helix formation with genomic DNA. Biochemistry 2007;46(40):11240-52. doi: 10.1021/bi700580y                                                                                                                                                                                        | USA    |
| 66 | 2008 | Yun HS, Do SH, Jeong WI, Yang HJ, Yuan DW, Hong IH, Lee HR, Lee IS, Kim YK, Choi MS, Kim HA, Jeong KS. Cytotoxic effects of the conjugated linoleic acid isomers t10c12, c9t11-CLA and mixed form on rat hepatic stellate cells and CCl4-induced hepatic fibrosis. J Nutr Biochem. 2008;19(3):175-83. doi: 10.1016/j.jnutbio.2007.02.007 | Korea  |
| 67 | 2008 | Wu LM, Wu XX, Sun Y, Kong XW, Zhang YH, Xu Q. A novel synthetic oleanolic acid derivative (CPU-II2) attenuates liver fibrosis in mice through regulating the function of hepatic stellate cells. J Biomed Sci. 2008;15(2):251-9. doi: 10.1007/s11373-007-9216-9                                                                          | China  |
| 68 | 2008 | Zvibel I, Bar-Zohar D, Kloog Y, Oren R, Reif S. The effect of Ras inhibition on the proliferation, apoptosis and matrix metalloproteases activity in rat hepatic stellate cells. Dig Dis Sci. 2008;53(4):1048-53. doi: 10.1007/s10620-007-9984-0                                                                                         | Israel |
| 69 | 2008 | Yang KL, Chang WT, Chuang CC, Hung KC, Li EI. Antagonizing TGF-beta induced liver fibrosis by a retinoic acid derivative through regulation of ROS and calcium influx. Biochem Biophys Res Commun. 2008;365(3):484-9. doi: 10.1016/j.bbrc.2007.10.203                                                                                    | Taiwan |
| 70 | 2008 | Bruck R, Weiss S, Traister A, Zvibel I, Aeed H, Halpern Z, Oren R. Induced hypothyroidism accelerates the regression of liver                                                                                                                                                                                                            | Israel |



|    |      |                                                                                                                                                                                                                                                                                              |           |
|----|------|----------------------------------------------------------------------------------------------------------------------------------------------------------------------------------------------------------------------------------------------------------------------------------------------|-----------|
|    |      | fibrosis in rats. J Gastroenterol Hepatol. 2007;22(12):2189-94. doi: 10.1111/j.1440-1746.2006.04777.x                                                                                                                                                                                        |           |
| 71 | 2008 | Yang H, Sung SH, Kim YC. Antifibrotic phenanthrenes of Dendrobium nobile stems. J Nat Prod. 2007;70(12):1925-9. doi: 10.1021/np070423f                                                                                                                                                       | Korea     |
| 72 | 2008 | Lee MK, Ha NR, Yang H, Sung SH, Kim GH, Kim YC. Antiproliferative activity of triterpenoids from Eclipta prostrata on hepatic stellate cells. Phytomedicine 2008;15(9):775-80. doi: 10.1016/j.phymed.2007.10.004                                                                             | Korea     |
| 73 | 2008 | Zhou X, Yu J, Li Q, Qian W, Xu KS. [Effects of transforming growth factor- beta 3 gene transfer on type I collagen synthesis of hepatic stellate cells]. Zhonghua Gan Zang Bing Za Zhi 2008;16(1):43-8. Chinese. PMID: 18226343                                                              | China     |
| 74 | 2008 | Liu J, Gong H, Zhang ZT, Wang Y. Effect of angiotensin II and angiotensin II type 1 receptor antagonist on the proliferation, contraction and collagen synthesis in rat hepatic stellate cells. Chin Med J. (Engl) 2008;121(2):161-5. PMID: 18272044                                         | China     |
| 75 | 2008 | Shen YM, Zhu X, Zhang KH, Xie Y, Chen J, Dai Y, Ou-Yang CH, Li BM. [Effect of ursolic acid on proliferation and apoptosis of hepatic stellate cells in vitro]. Zhonghua Gan Zang Bing Za Zhi 2008;16(4):298-301. Chinese. PMID: 18423155                                                     | China     |
| 76 | 2008 | Lim MC, Maubach G, Zhuo L. Glial fibrillary acidic protein splice variants in hepatic stellate cells--expression and regulation. Mol Cells 2008;25(3):376-84. PMID: 18443417                                                                                                                 | Singapore |
| 77 | 2008 | Yuhua Z, Wanhua R, Chenggang S, Jun S, Yanjun W, Chunqing Z. Disruption of connective tissue growth factor by short hairpin RNA inhibits collagen synthesis and extracellular matrix secretion in hepatic stellate cells. Liver Int. 2008;28(5):632-9. doi: 10.1111/j.1478-3231.2008.01730.x | China     |
| 78 | 2008 | Li Q, Zhou X, Yu J, Qian W, Xu KS. [Influence of recombinant transforming growth factor-beta3 on collagen synthesis and deposition: experiment with rat cell model of liver fibrosis]. Zhonghua Yi Xue Za Zhi 2008;88(18):1273-8. Chinese. PMID: 18844103                                    | China     |
| 79 | 2008 | Li X, Meng Y, Huang ML, Zhang XL, Zhang ZS. [Angiotensin II stimulates platelet-derived growth factor-B expression in hepatic stellate cells by activating EGR-1]. Nan Fang Yi Ke Da Xue Xue Bao 2008;28(6):963-7. Chinese. PMID: 18583239                                                   | China     |
| 80 | 2008 | Zhang XL, Li X, Xiao B, Huang ML, Meng Y, Li YF, Wang YY, Song WB. [Effect of angiotensin II on Rho-Rock pathway in rat hepatic stellate cell contraction]. Nan Fang Yi Ke Da Xue Xue Bao 2008;28(6):968-71. Chinese. PMID: 18583240                                                         | China     |
| 81 | 2008 | Lee MK, Yang H, Yoon JS, Jeong EJ, Kim DY, Ha NR, Sung SH, Kim YC. Antifibrotic activity of diterpenes from Biota orientalis leaves on hepatic stellate cells. Arch Pharm Res. 2008;31(7):866-71. doi: 10.1007/s12272-001-1239-9                                                             | Korea     |
| 82 | 2008 | Lin YL, Wu CF, Huang YT. Phenols from the roots of Rheum palmatum attenuate chemotaxis in rat hepatic stellate cells. Planta Med. 2008;74(10):1246-52. doi: 10.1055/s-2008-1074581                                                                                                           | Taiwan    |

|    |      |                                                                                                                                                                                                                                                                                                                                                  |           |
|----|------|--------------------------------------------------------------------------------------------------------------------------------------------------------------------------------------------------------------------------------------------------------------------------------------------------------------------------------------------------|-----------|
| 83 | 2008 | Hu PF, Zhu YW, Zhong W, Chen YX, Lin Y, Zhang X, Yin C, Yue HY, Xie WF. Inhibition of plasminogen activator inhibitor-1 expression by siRNA in rat hepatic stellate cells. J Gastroenterol Hepatol. 2008;23(12):1917-25. doi: <a href="https://doi.org/10.1111/j.1440-1746.2008.05485.x">10.1111/j.1440-1746.2008.05485.x</a>                    | China     |
| 84 | 2008 | Zhao L, Zhang C, Zhuo L, Zhang Y, Ying JY. Imidazolium salts: a mild reducing and antioxidative reagent. J Am Chem Soc. 2008;130(38):12586-7. doi: <a href="https://doi.org/10.1021/ja8037883">10.1021/ja8037883</a>                                                                                                                             | Singapore |
| 85 | 2008 | Li G, Li D, Xie Q, Shi Y, Jiang S, Jin Y. RNA interfering connective tissue growth factor prevents rat hepatic stellate cell activation and extracellular matrix production. J Gene Med. 2008;10(9):1039-47. doi: <a href="https://doi.org/10.1002/jgm.1223">10.1002/jgm.1223</a>                                                                | China     |
| 86 | 2008 | Zhang XL, Xiao B, Li X, Huang ML, Meng Y, Li YF, Wang YY, Song WB. [Role of Rho-Rock pathways induced by angiotensin II in hepatic stellate cell contraction]. Zhonghua Yi Xue Za Zhi 2008;88(34):2422-6. Chinese. PMID: <a href="https://pubmed.ncbi.nlm.nih.gov/19087721/">19087721</a>                                                        | China     |
| 87 | 2008 | Shyu MH, Kao TC, Yen GC. Hsian-tsao (Mesona procumbens Heml.) prevents against rat liver fibrosis induced by CCl(4) via inhibition of hepatic stellate cells activation. Food Chem Toxicol. 2008;46(12):3707-13. doi: <a href="https://doi.org/10.1016/j.fct.2008.09.051">10.1016/j.fct.2008.09.051</a>                                          | Taiwan    |
| 88 | 2008 | Deng X, Chen YX, Zhang X, Zhang JP, Yin C, Yue HY, Lin Y, Han ZG, Xie WF. Hepatic stellate cells modulate the differentiation of bone marrow mesenchymal stem cells into hepatocyte-like cells. J Cell Physiol. 2008;217(1):138-44. doi: <a href="https://doi.org/10.1002/jcp.21481">10.1002/jcp.21481</a>                                       | China     |
| 89 | 2008 | Bruck R, Weiss S, Aeed H, Pines M, Halpern Z, Zvibel I. Additive inhibitory effect of experimentally induced hepatic cirrhosis by agonists of peroxisome proliferator activator receptor gamma and retinoic acid receptor. Dig Dis Sci. 2009;54(2):292-9. doi: <a href="https://doi.org/10.1007/s10620-008-0336-5">10.1007/s10620-008-0336-5</a> | Israel    |
| 90 | 2008 | Lin YL, Wu CF, Huang YT. Effects of rhubarb on migration of rat hepatic stellate cells. J Gastroenterol Hepatol. 2009;24(3):453-61. doi: <a href="https://doi.org/10.1111/j.1440-1746.2008.05573.x">10.1111/j.1440-1746.2008.05573.x</a>                                                                                                         | Taiwan    |
| 91 | 2008 | Li GM, Li DG, Xie Q, Zong CH, Jiang S, Lu HM. [Effects of silencing connective tissue growth factor on rat transforming growth factor beta/Smads signal]. Zhonghua Gan Zang Bing Za Zhi 2008;16(11):840-3. Chinese. PMID: <a href="https://pubmed.ncbi.nlm.nih.gov/19032869/">19032869</a>                                                       | China     |
| 92 | 2008 | Shi HY, Xu JW, Ren XX. [Effect of genistein on hepatic stellate cell proliferation and lipid peroxidation in vitro]. Nan Fang Yi Ke Da Xue Xue Bao 2008;28(11):2066-8. Chinese. PMID: <a href="https://pubmed.ncbi.nlm.nih.gov/19033130/">19033130</a>                                                                                           | China     |
| 93 | 2008 | Ishigaki N, Yamamoto N, Jin H, Uchida K, Terai S, Sakaida I. Continuous intravenous infusion of atrial natriuretic peptide (ANP) prevented liver fibrosis in rat. Biochem Biophys Res Commun. 2009;378(3):354-9. doi: <a href="https://doi.org/10.1016/j.bbrc.2008.10.154">10.1016/j.bbrc.2008.10.154</a>                                        | Japan     |
| 94 | 2008 | Wang AM, Ren CH, Xiang Y. [Growth factors may enhance c-fos and c-jun gene expressions of hepatic stellate cells]. Zhonghua Gan Zang Bing Za Zhi 2008;16(12):902-4. Chinese. PMID: <a href="https://pubmed.ncbi.nlm.nih.gov/19105933/">19105933</a>                                                                                              | China     |



|     |      |                                                                                                                                                                                                                                                                              |        |
|-----|------|------------------------------------------------------------------------------------------------------------------------------------------------------------------------------------------------------------------------------------------------------------------------------|--------|
| 95  | 2009 | Liu J, Xu XF, Yang WJ. [The effects of Hedgehog-Gli 1 signaling pathway on proliferation and apoptosis of hepatic stellate cells]. Zhonghua Gan Zang Bing Za Zhi 2009;17(1):33-7. Chinese. PMID: 19203449                                                                    | China  |
| 96  | 2009 | Yang N, Ye Z, Li F, Mahato RI. HPMa polymer-based site-specific delivery of oligonucleotides to hepatic stellate cells. Bioconjug Chem. 2009;20(2):213-21. doi: 10.1021/bc800237t                                                                                            | USA    |
| 97  | 2009 | Yang L, Dan D, Zhu R, Zhou W, Qian W, Ye J, Hou X. [Beta-elemene inhibits expression of ANG II and RhoA/ROCK signaling in hepatic stellate cells]. Zhongguo Zhong Yao Za Zhi 2009;34(4):458-63. Chinese. PMID: 19459312                                                      | China  |
| 98  | 2009 | Li X, Zhang YJ, Meng Y, Zhou GS, Zhang ZS. [Effect of angiotensin II type 1 receptor and angiotensin-converting enzyme gene silencing on nuclear factor- kappaB activity in hepatic stellate cells]. Nan Fang Yi Ke Da Xue Xue Bao 2009;29(3):402-4. Chinese. PMID: 19304510 | China  |
| 99  | 2009 | Li WT, He YW, Xiao ZH, Ma YB. [Effect of beta-catenin on the activation of hepatic stellate cells induced by transforming growth factor-beta1]. Zhonghua Gan Zang Bing Za Zhi 2009;17(3):188-92. Chinese. PMID: 19335981                                                     | China  |
| 100 | 2009 | Ma J, Li F, Liu L, Cui D, Wu X, Jiang X, Jiang H. Raf kinase inhibitor protein inhibits cell proliferation but promotes cell migration in rat hepatic stellate cells. Liver Int. 2009;29(4):567-74. doi: 10.1111/j.1478-3231.2009.01981.x                                    | China  |
| 101 | 2009 | Ying SS, Li X, Huang ML, Meng Y, Zhang ZS. [Effect of angiotensin1-7 on alpha-smooth muscle actin protein expression in rat hepatic stellate cells]. Nan Fang Yi Ke Da Xue Xue Bao 2009;29(4):732-3. Chinese. PMID: 19403408                                                 | China  |
| 102 | 2009 | Cheng K, Yang N, Mahato RI. TGF-beta1 gene silencing for treating liver fibrosis. Mol Pharm. 2009;6(3):772-9. doi: 10.1021/mp9000469                                                                                                                                         | USA    |
| 103 | 2009 | He YJ, Pan J, Shu JC, Shen Y, Lv X, Fang L. [The role and mechanisms of cyclooxygenase-2 inhibitors on the proliferation of hepatic stellate cell]. Zhonghua Gan Zang Bing Za Zhi 2009;17(5):346-9. Chinese. PMID: 19497199                                                  | China  |
| 104 | 2009 | Yue LP, Ma H, Feng YS, Jia JD. [Effects of rat recombinant leptin on matrix metalloproteinase-2 gene expression, protein level and enzymatic activity in HSC-T6 cells]. Zhonghua Gan Zang Bing Za Zhi 2009;17(5):383-4. Chinese. PMID: 19497207                              | China  |
| 105 | 2009 | Zhao ZD, Huang ZS. [Study on effects of curcumin on expressions of PDGF-BB, PDGFRbeta and ERK1 of HSC]. Zhong Yao Cai 2009;32(5):732-5. Chinese. PMID: 19771848                                                                                                              | China  |
| 106 | 2009 | Yang MF, Xie J, Gu XY, Zhang XH, Davey AK, Zhang SJ, Wang JP, Zhu RM. Involvement of 90-kuD ribosomal S6 kinase in collagen type I expression in rat hepatic fibrosis. World J Gastroenterol. 2009;15(17):2109-15. doi: 10.3748/wjg.15.2109                                  | China  |
| 107 | 2009 | Wang GJ, Huang YJ, Chen DH, Lin YL. Ganoderma lucidum extract attenuates the proliferation of hepatic stellate cells by blocking the PDGF receptor. Phytother Res. 2009;23(6):833-9. doi: 10.1002/ptr.2687                                                                   | Taiwan |

|     |      |                                                                                                                                                                                                                                                                                      |        |
|-----|------|--------------------------------------------------------------------------------------------------------------------------------------------------------------------------------------------------------------------------------------------------------------------------------------|--------|
| 108 | 2009 | Lin YL, Lin CY, Chi CW, Huang YT. Study on antifibrotic effects of curcumin in rat hepatic stellate cells. <i>Phytother Res.</i> 2009;23(7):927-32. doi: <a href="#">10.1002/ptr.2764</a>                                                                                            | Taiwan |
| 109 | 2009 | Wang AM, Ren CG, Ma ZJ, Xiang Y, Zhang ZW, Zhu ZJ, Wang BE. [Regulation of c-fos gene expression in hepatic stellate cells by transforming growth factor beta]. <i>Nan Fang Yi Ke Da Xue Xue Bao</i> 2009;29(7):1408-9. Chinese. PMID: <a href="#">19620067</a>                      | China  |
| 110 | 2009 | Liu LX, Huang S, Zhang QQ, Liu Y, Zhang DM, Guo XH, Han DW. Insulin-like growth factor binding protein-7 induces activation and transdifferentiation of hepatic stellate cells in vitro. <i>World J Gastroenterol.</i> 2009;15(26):3246-53. doi: <a href="#">10.3748/wjg.15.3246</a> | China  |
| 111 | 2009 | Weng TC, Shen CC, Chiu YT, Lin YL, Kuo CD, Huang YT. Inhibitory effects of arnepavine against hepatic fibrosis in rats. <i>J Biomed Sci.</i> 2009;16(1):78. doi: <a href="#">10.1186/1423-0127-16-78</a>                                                                             | Taiwan |
| 112 | 2009 | Qian J, Zhang JS, Wang XQ, Ji JL, Mei S. Fenretinide stimulates the apoptosis of hepatic stellate cells and ameliorates hepatic fibrosis in mice. <i>Hepatol Res.</i> 2009;39(12):1229-47. doi: <a href="#">10.1111/j.1872-034X.2009.00562.x</a>                                     | China  |
| 113 | 2009 | Tang LX, Yang G, Tang JJ. [Smad7 inhibits collagen expression in human hepatic satellite cells in vitro]. <i>Nan Fang Yi Ke Da Xue Xue Bao</i> 2009;29(10):2122-3, 2127. Chinese. PMID: <a href="#">19861282</a>                                                                     | China  |
| 114 | 2009 | Liu DG, Wang J, Zhang ZT, Wang Y. The urotension II antagonist SB-710411 arrests fibrosis in CCL4 cirrhotic rats. <i>Mol Med Rep.</i> 2009;2(6):953-61. doi: <a href="#">10.3892/mmr_00000198</a>                                                                                    | China  |
| 115 | 2009 | Kim HK, Yang TH, Cho HY. Antifibrotic effects of green tea on in vitro and in vivo models of liver fibrosis. <i>World J Gastroenterol.</i> 2009;15(41):5200-5. doi: <a href="#">10.3748/wjg.15.5200</a>                                                                              | Korea  |
| 116 | 2009 | Shu JC, He YJ, Lv X, Zhao JR, Zhao J, Shen Y, Ye GR, Wang LX. Effect of curcumin on the proliferation and apoptosis of hepatic stellate cells. <i>Braz J Med Biol Res.</i> 2009;42(12):1173-8. doi: <a href="#">10.1590/s0100-879x2009005000041</a>                                  | China  |
| 117 | 2009 | Lee MK, Lee KY, Jeon HY, Sung SH, Kim YC. Antifibrotic activity of triterpenoids from the aerial parts of <i>Euscaphis japonica</i> on hepatic stellate cells. <i>J Enzyme Inhib Med Chem.</i> 2009;24(6):1276-9. doi: <a href="#">10.3109/14756360902829709</a>                     | Korea  |
| 118 | 2010 | Wang JH, Shin JW, Son JY, Cho JH, Son CG. Antifibrotic effects of CGX, a traditional herbal formula, and its mechanisms in rats. <i>J Ethnopharmacol.</i> 2010;127(2):534-42. doi: <a href="#">10.1016/j.jep.2009.10.001</a>                                                         | Korea  |
| 119 | 2010 | Dai L, Ji H, Kong XW, Zhang YH. Antifibrotic effects of ZK14, a novel nitric oxide-donating biphenyldicarboxylate derivative, on rat HSC-T6 cells and CCl4-induced hepatic fibrosis. <i>Acta Pharmacol Sin.</i> 2010;31(1):27-34. doi: <a href="#">10.1038/aps.2009.170</a>          | China  |
| 120 | 2010 | Wang R, Chen WH, Shi YP. ent-kaurane and ent-pimarane diterpenoids from <i>Siegesbeckia pubescens</i> . <i>J Nat Prod.</i> 2010;73(1):17-21. doi: <a href="#">10.1021/np9005579</a>                                                                                                  | China  |

|     |      |                                                                                                                                                                                                                                                                                                                                                          |       |
|-----|------|----------------------------------------------------------------------------------------------------------------------------------------------------------------------------------------------------------------------------------------------------------------------------------------------------------------------------------------------------------|-------|
| 121 | 2010 | Lim CS, Kim EY, Lee HS, Soh Y, Sohn Y, Kim SY, Sohn NW, Jung HS, Kim YB. Protective effects of Cinnamomum cassia Blume in the fibrogenesis of activated HSC-T6 cells and dimethylnitrosamine-induced acute liver injury in SD rats. Biosci Biotechnol Biochem. 2010;74(3):477-83. doi: <a href="https://doi.org/10.1271/bbb.90435">10.1271/bbb.90435</a> | Korea |
| 122 | 2010 | Ge HM, Peng H, Guo ZK, Cui JT, Song YC, Tan RX. Bioactive alkaloids from the plant endophytic fungus <i>Aspergillus terreus</i> . Planta Med. 2010;76(8):822-4. doi: <a href="https://doi.org/10.1055/s-0029-1240726">10.1055/s-0029-1240726</a>                                                                                                         | China |
| 123 | 2010 | Bae MA, Rhee SD, Jung WH, Ahn JH, Song BJ, Cheon HG. Selective inhibition of activated stellate cells and protection from carbon tetrachloride-induced liver injury in rats by a new PPARgamma agonist KR62776. Arch Pharm Res. 2010;33(3):433-42. doi: <a href="https://doi.org/10.1007/s12272-010-0313-3">10.1007/s12272-010-0313-3</a>                | Korea |
| 124 | 2010 | Zhang Y, Deng Q, Hu GX, Yuan K, Yuan F, Huang YQ. [Effect of hydroxycamptothecin (HCPT) on proliferation and apoptosis of rat hepatic stellate cells]. Zhonghua Gan Zang Bing Za Zhi 2010;18(3):199-203. Chinese. doi: <a href="https://doi.org/10.3760/cma.j.issn.1007-3418.2010.03.012">10.3760/cma.j.issn.1007-3418.2010.03.012</a>                   | China |
| 125 | 2010 | Cui D, Zhang S, Ma J, Han J, Jiang H. Short interfering RNA targetting NF- kappa B induces apoptosis of hepatic stellate cells and attenuates extracellular matrix production. Dig Liver Dis. 2010;42(11):813-7. doi: <a href="https://doi.org/10.1016/j.dld.2010.03.011">10.1016/j.dld.2010.03.011</a>                                                  | China |
| 126 | 2010 | Yu FJ, Dong PH, Fan XF, Lin Z, Chen YP, Li J. Down-regulation of angiotensin II by shRNA reduces collagen synthesis in hepatic stellate cells. Int J Mol Med. 2010;25(5):801-6. doi: <a href="https://doi.org/10.3892/ijmm_00000407">10.3892/ijmm_00000407</a>                                                                                           | China |
| 127 | 2010 | Sun W, Gui S, Wu L, Wang H, Wei W. [Effects of Shaoqiduogan on MMP-13, TIMP-1 expression in liver and hepatic stellate cells of hepatic fibrosis rats]. Zhongguo Zhong Yao Za Zhi 2010;35(11):1447-51. Chinese. PMID: <a href="https://pubmed.ncbi.nlm.nih.gov/20822018/">20822018</a>                                                                   | China |
| 128 | 2010 | Kim KS, Hur W, Park SJ, Hong SW, Choi JE, Goh EJ, Yoon SK, Hahn SK. Bioimaging for targeted delivery of hyaluronic Acid derivatives to the livers in cirrhotic mice using quantum dots. ACS Nano. 2010;4(6):3005-14. doi: <a href="https://doi.org/10.1021/nn100589y">10.1021/nn100589y</a>                                                              | Korea |
| 129 | 2010 | Chen BY, Qu P, Tie R, Zhu MZ, Zhu XX, Yu J. Protecting effects of vasonatrin peptide against carbon tetrachloride-induced liver fibrosis. Regul Pept. 2010;164(2-3):139-43. doi: <a href="https://doi.org/10.1016/j.regpep.2010.06.007">10.1016/j.regpep.2010.06.007</a>                                                                                 | China |
| 130 | 2010 | Dong P, Yu F, Fan X, Lin Z, Chen Y, Li J. Inhibition of ATIR by shRNA prevents collagen synthesis in hepatic stellate cells. Mol Cell Biochem. 2010;344(1-2):195-202. doi: <a href="https://doi.org/10.1007/s11010-010-0542-2">10.1007/s11010-010-0542-2</a>                                                                                             | China |
| 131 | 2010 | Wu JH, Wang YR, Huang WY, Tan RX. Anti-proliferative and pro-apoptotic effects of tectorigenin on hepatic stellate cells. World J Gastroenterol. 2010;16(31):3911-8. doi: <a href="https://doi.org/10.3748/wjg.v16.i31.3911">10.3748/wjg.v16.i31.3911</a>                                                                                                | China |
| 132 | 2010 | Dun ZN, Zhang XL, An JY, Zheng LB, Barrett R, Xie SR. Specific shRNA targeting of FAK influenced collagen metabolism in rat hepatic stellate cells. World J Gastroenterol. 2010;16(32):4100-6. doi: <a href="https://doi.org/10.3748/wjg.v16.i32.4100">10.3748/wjg.v16.i32.4100</a>                                                                      | China |

|     |      |                                                                                                                                                                                                                                                                                                 |        |
|-----|------|-------------------------------------------------------------------------------------------------------------------------------------------------------------------------------------------------------------------------------------------------------------------------------------------------|--------|
| 133 | 2010 | Li L, Li J, Wang JY, Yang CQ, Jia ML, Jiang W. Role of RhoA in platelet- derived growth factor-BB-induced migration of rat hepatic stellate cells. Chin Med J. (Engl) 2010;123(18):2502-9. PMID: 21034618                                                                                       | China  |
| 134 | 2010 | Zhu L, Mahato RI. Targeted delivery of siRNA to hepatocytes and hepatic stellate cells by bioconjugation. Bioconjug Chem. 2010;21(11):2119-27. doi: 10.1021/bc100346n                                                                                                                           | USA    |
| 135 | 2010 | He WH, Li B, Zhu X, Zhang KH, Li BM, Liu ZJ, Liu GY, Wang J. [The role and mechanism of NADPH oxidase in leptin-induced reactive oxygen species production in hepatic stellate cells]. Zhonghua Gan Zang Bing Za Zhi 2010;18(11):849-54. Chinese. doi: 10.3760/cma.j.issn.1007-3418.2010.11.014 | China  |
| 136 | 2011 | Ding H, Shi J, Wang Y, Guo J, Zhao J, Dong L. Neferine inhibits cultured hepatic stellate cell activation and facilitates apoptosis: A possible molecular mechanism. Eur J Pharmacol. 2011;650(1):163-9. doi: 10.1016/j.ejphar.2010.10.025                                                      | China  |
| 137 | 2011 | Ping J, Li JT, Liao ZX, Shang L, Wang H. Indole-3-carbinol inhibits hepatic stellate cells proliferation by blocking NADPH oxidase/reactive oxygen species/p38 MAPK pathway. Eur J Pharmacol. 2011;650(2-3):656-62. doi: 10.1016/j.ejphar.2010.10.057                                           | China  |
| 138 | 2011 | Choi JH, Hwang YP, Park BH, Choi CY, Chung YC, Jeong HG. Anthocyanins isolated from the purple-fleshed sweet potato attenuate the proliferation of hepatic stellate cells by blocking the PDGF receptor. Environ Toxicol Pharmacol. 2011;31(1):212-9. doi: 10.1016/j.etap.2010.10.011           | Korea  |
| 139 | 2011 | Shin E, Lee C, Sung SH, Kim YC, Hwang BY, Lee MK. Antifibrotic activity of coumarins from Cnidium monnieri fruits in HSC-T6 hepatic stellate cells. J Nat Med. 2011;65(2):370-4. doi: 10.1007/s11418-010-0485-7                                                                                 | Korea  |
| 140 | 2011 | Ming-Ju H, Yih-Shou H, Tzy-Yen C, Hui-Ling C. Hepatitis C virus E2 protein induce reactive oxygen species (ROS)-related fibrogenesis in the HSC-T6 hepatic stellate cell line. J Cell Biochem. 2011;112(1):233-43. doi: 10.1002/jcb.22926                                                       | China  |
| 141 | 2011 | Zhang JJ, Wang YL, Feng XB, Song XD, Liu WB. Rosmarinic acid inhibits proliferation and induces apoptosis of hepatic stellate cells. Biol Pharm Bull. 2011;34(3):343-8. doi: 10.1248/bpb.34.343                                                                                                 | China  |
| 142 | 2011 | Li JF, Lu GF, Zou YY. Demethylbellidifolin inhibits proliferation and activation of hepatic stellate cells. J Invest Surg. 2011;24(4):171-7. doi: 10.3109/08941939.2011.568593                                                                                                                  | China  |
| 143 | 2011 | Li J, Fan R, Zhao S, Liu L, Guo S, Wu N, Zhang W, Chen P. Reactive oxygen species released from hypoxic hepatocytes regulates MMP-2 expression in hepatic stellate cells. Int J Mol Sci. 2011;12(4):2434-47. doi: 10.3390/ijms12042434                                                          | China  |
| 144 | 2011 | Foo NP, Lin SH, Lee YH, Wu MJ, Wang YJ. $\alpha$ -Lipoic acid inhibits liver fibrosis through the attenuation of ROS-triggered signaling in hepatic stellate cells activated by PDGF and TGF- $\beta$ . Toxicology 2011;282(1-2):39-46. doi: 10.1016/j.tox.2011.01.009                          | Taiwan |
| 145 | 2011 | Renga B, Mencarelli A, Migliorati M, Cipriani S, D'Amore C, Distrutti E, Fiorucci S. SHP-dependent and -independent                                                                                                                                                                             | Italy  |

|     |      |                                                                                                                                                                                                                                                                                                                                                               |        |
|-----|------|---------------------------------------------------------------------------------------------------------------------------------------------------------------------------------------------------------------------------------------------------------------------------------------------------------------------------------------------------------------|--------|
|     |      | induction of peroxisome proliferator- activated receptor- $\gamma$ by the bile acid sensor farnesoid X receptor counter- regulates the pro-inflammatory phenotype of liver myofibroblasts. <i>Inflamm Res.</i> 2011;60(6):577-87. doi: <a href="https://doi.org/10.1007/s00011-010-0306-1">10.1007/s00011-010-0306-1</a>                                      |        |
| 146 | 2011 | Bartalis J, Halaweish FT. In vitro and QSAR studies of cucurbitacins on HepG2 and HSC-T6 liver cell lines. <i>Bioorg Med Chem.</i> 2011;19(8):2757-66. doi: <a href="https://doi.org/10.1016/j.bmc.2011.01.037">10.1016/j.bmc.2011.01.037</a>                                                                                                                 | USA    |
| 147 | 2011 | Yang H, Jeong EJ, Kim J, Sung SH, Kim YC. Antiproliferative triterpenes from the leaves and twigs of <i>Juglans sinensis</i> on HSC-T6 cells. <i>J Nat Prod.</i> 2011;74(4):751-6. doi: <a href="https://doi.org/10.1021/np1008202">10.1021/np1008202</a>                                                                                                     | Korea  |
| 148 | 2011 | Pang W, Zhang Y, Wang S, Jia A, Dong W, Cai C, Hua Z, Zhang J. The mPlrp2 and mClps genes are involved in the hydrolysis of retinyl esters in the mouse liver. <i>J Lipid Res.</i> 2011;52(5):934-41. doi: <a href="https://doi.org/10.1194/jlr.M010082">10.1194/jlr.M010082</a>                                                                              | China  |
| 149 | 2011 | Tsai MK, Lin YL, Huang YT. Differential inhibitory effects of salvianolic acids on activation of rat hepatic stellate cells by platelet-derived growth factor. <i>Planta Med.</i> 2011;77(13):1495-503. doi: <a href="https://doi.org/10.1055/s-0030-1270783">10.1055/s-0030-1270783</a>                                                                      | Taiwan |
| 150 | 2011 | Wang XD, Gao ZH, Xue X, Cheng YN, Yue P, Fang XW, Qu XJ. N1-acetyl substituted pyrrolidine derivative CIP-A5: a novel compound that could ameliorate liver cirrhosis through modulation of hepatic stellate cell activity. <i>Toxicol In Vitro</i> 2011;25(4):897-904. doi: <a href="https://doi.org/10.1016/j.tiv.2011.02.011">10.1016/j.tiv.2011.02.011</a> | China  |
| 151 | 2011 | Yang N, Mahato RI. GFAP promoter-driven RNA interference on TGF- $\beta$ 1 to treat liver fibrosis. <i>Pharm Res.</i> 2011;28(4):752-61. doi: <a href="https://doi.org/10.1007/s11095-011-0384-y">10.1007/s11095-011-0384-y</a>                                                                                                                               | USA    |
| 152 | 2011 | Fu R, Wu J, Ding J, Sheng J, Hong L, Sun Q, Fang H, Xiang D. Targeting transforming growth factor $\beta$ RII expression inhibits the activation of hepatic stellate cells and reduces collagen synthesis. <i>Exp Biol Med.</i> (Maywood) 2011;236(3):291-7. doi: <a href="https://doi.org/10.1258/ebm.2010.010231">10.1258/ebm.2010.010231</a>               | China  |
| 153 | 2011 | Huang HC, Lin YC, Fazary AE, Lo IW, Liaw CC, Huang YZ, Liou SS, Shen YC. New and bioactive lignans from the fruits of <i>Schisandra sphenanthera</i> . <i>Food Chem.</i> 2011;128(2):348-57. doi: <a href="https://doi.org/10.1016/j.foodchem.2011.03.030">10.1016/j.foodchem.2011.03.030</a>                                                                 | Taiwan |
| 154 | 2011 | Wu XX, Wu LM, Fan JJ, Qin Y, Chen G, Wu XF, Shen Y, Sun Y, Xu Q. Cortex Dictamni extract induces apoptosis of activated hepatic stellate cells via STAT1 and attenuates liver fibrosis in mice. <i>J Ethnopharmacol.</i> 2011;135(1):173-8. doi: <a href="https://doi.org/10.1016/j.jep.2011.03.010">10.1016/j.jep.2011.03.010</a>                            | China  |
| 155 | 2011 | Li W, Zhu C, Chen X, Li Y, Gao R, Wu Q. Pokeweed antiviral protein down- regulates Wnt/ $\beta$ -catenin signalling to attenuate liver fibrogenesis in vitro and in vivo. <i>Dig Liver Dis.</i> 2011;43(7):559-66. doi: <a href="https://doi.org/10.1016/j.dld.2011.02.016">10.1016/j.dld.2011.02.016</a>                                                     | China  |
| 156 | 2011 | Lee M, Lee MK, Kim YC, Sung SH. Antifibrotic constituents of <i>Alnus firma</i> on hepatic stellate cells. <i>Bioorg Med Chem Lett.</i> 2011;21(10):2906-10. doi: <a href="https://doi.org/10.1016/j.bmcl.2011.03.074">10.1016/j.bmcl.2011.03.074</a>                                                                                                         | Korea  |

|     |      |                                                                                                                                                                                                                                                                                                                                                                                                                                                                                                                                                                                         |        |
|-----|------|-----------------------------------------------------------------------------------------------------------------------------------------------------------------------------------------------------------------------------------------------------------------------------------------------------------------------------------------------------------------------------------------------------------------------------------------------------------------------------------------------------------------------------------------------------------------------------------------|--------|
| 157 | 2011 | Qian KL, Xu N, Lang Q, Qi JH, Sun YC, Xiao L, Liu Q, Shi XF. [Construction and identification of siRNA eukaryotic expression vectors targeting on TGF $\beta$ 1, TIMP-1 and TIMP-2 genes in vitro]. Zhonghua Gan Zang Bing Za Zhi 2011;19(4):291-6. Chinese. doi: <a href="https://doi.org/10.3760/cma.j.issn.1007-3418.2011.04.014">10.3760/cma.j.issn.1007-3418.2011.04.014</a>                                                                                                                                                                                                       | China  |
| 158 | 2011 | Shukla RS, Qin B, Wan YJ, Cheng K. PCBP2 siRNA reverses the alcohol-induced pro-fibrogenic effects in hepatic stellate cells. Pharm Res. 2011;28(12):3058-68. doi: <a href="https://doi.org/10.1007/s11095-011-0475-9">10.1007/s11095-011-0475-9</a>                                                                                                                                                                                                                                                                                                                                    | USA    |
| 159 | 2011 | Li J, Liu P, Zhang R, Cao L, Qian H, Liao J, Xu W, Wu M, Yin Z. Icaritin induces cell death in activated hepatic stellate cells through mitochondrial activated apoptosis and ameliorates the development of liver fibrosis in rats. J Ethnopharmacol. 2011;137(1):714-23. doi: <a href="https://doi.org/10.1016/j.jep.2011.06.030">10.1016/j.jep.2011.06.030</a>                                                                                                                                                                                                                       | China  |
| 160 | 2011 | Chong LW, Hsu YC, Chiu YT, Yang KC, Huang YT. Antifibrotic effects of triptolide on hepatic stellate cells and dimethylnitrosamine-intoxicated rats. Phytother Res. 2011;25(7):990-9. doi: <a href="https://doi.org/10.1002/ptr.3381">10.1002/ptr.3381</a>                                                                                                                                                                                                                                                                                                                              | Taiwan |
| 161 | 2011 | Chuang HY, Ng LT, Lin LT, Chang JS, Chen JY, Lin TC, Lin CC. Hydrolysable tannins of tropical almond show antifibrotic effects in TGF- $\beta$ 1-induced hepatic stellate cells. J Sci Food Agric. 2011;91(15):2777-84. doi: <a href="https://doi.org/10.1002/jsfa.4521">10.1002/jsfa.4521</a>                                                                                                                                                                                                                                                                                          | Taiwan |
| 162 | 2011 | Zhang XL, Xiao B, Meng Y, Li X. [Aldosterone stimulates hepatic stellate cells contraction via Ca <sup>2+</sup> -independent pathways]. Zhonghua Gan Zang Bing Za Zhi 2011;19(7):537-41. Chinese. doi: <a href="https://doi.org/10.3760/cma.j.issn.1007-3418.2011.07.016">10.3760/cma.j.issn.1007-3418.2011.07.016</a>                                                                                                                                                                                                                                                                  | China  |
| 163 | 2011 | Ping J, Gao AM, Xu D, Li RW, Wang H. [Therapeutic effect of indole-3-carbinol on pig serum-induced hepatic fibrosis in rats]. Yao Xue Xue Bao 2011;46(8):915-21. Chinese. PMID: <a href="https://pubmed.ncbi.nlm.nih.gov/22007515/">22007515</a>                                                                                                                                                                                                                                                                                                                                        | China  |
| 164 | 2011 | Ping J, Gao AM, Qin HQ, Wei XN, Bai J, Liu L, Li XH, Li RW, Ao Y, Wang H. Indole-3-carbinol enhances the resolution of rat liver fibrosis and stimulates hepatic stellate cell apoptosis by blocking the inhibitor of $\kappa$ B kinase $\alpha$ /inhibitor of $\kappa$ B- $\alpha$ /nuclear factor- $\kappa$ B pathway. J Pharmacol Exp Ther. 2011;339(2):694-703. doi: <a href="https://doi.org/10.1124/jpet.111.179820">10.1124/jpet.111.179820</a> . Retraction in: J Pharmacol Exp Ther. 2012;342(1):233. PMID: <a href="https://pubmed.ncbi.nlm.nih.gov/21862660/">21862660</a> . | China  |
| 165 | 2011 | Lu P, Liu H, Yin H, Yang L. Expression of angiotensinogen during hepatic fibrogenesis and its effect on hepatic stellate cells. Med Sci Monit. 2011;17(9):BR248-56. doi: <a href="https://doi.org/10.12659/msm.881928">10.12659/msm.881928</a>                                                                                                                                                                                                                                                                                                                                          | China  |
| 166 | 2011 | Chin YW, Shin E, Hwang BY, Lee MK. Antifibrotic constituents from Garcinia mangostana. Nat Prod Commun. 2011;6(9):1267-8. PMID: <a href="https://pubmed.ncbi.nlm.nih.gov/21941895/">21941895</a>                                                                                                                                                                                                                                                                                                                                                                                        | Korea  |
| 167 | 2011 | Lo YT, Tsai YH, Wu SJ, Chen JR, Chao JC. Ginsenoside Rb1 inhibits cell activation and liver fibrosis in rat hepatic stellate cells. J Med Food. 2011;14(10):1135-43. doi: <a href="https://doi.org/10.1089/jmf.2010.1485">10.1089/jmf.2010.1485</a>                                                                                                                                                                                                                                                                                                                                     | Taiwan |
| 168 | 2011 | Deng L, Li Y, Huang JM, Zhou GY, Li Q, Qian W, Xu KS. [Effects of exogenous transforming growth factor- $\beta$ 3 on the activities of its promoter and cAMP- responsive element binding protein-1 in rat hepatic stellate cell]. Zhonghua Yi Xue Za Zhi                                                                                                                                                                                                                                                                                                                                | China  |



|     |      |                                                                                                                                                                                                                                                                                                                                                                                          |        |
|-----|------|------------------------------------------------------------------------------------------------------------------------------------------------------------------------------------------------------------------------------------------------------------------------------------------------------------------------------------------------------------------------------------------|--------|
|     |      | 2011;91(33):2366-9. Chinese. PMID: 22321755                                                                                                                                                                                                                                                                                                                                              |        |
| 169 | 2011 | Ge WS, Wu JX, Fan JG, Wang YJ, Chen YW. Inhibition of high-mobility group box 1 expression by siRNA in rat hepatic stellate cells. <i>World J Gastroenterol.</i> 2011;17(36):4090-8. doi: 10.3748/wjg.v17.i36.4090                                                                                                                                                                       | China  |
| 170 | 2011 | He X, Lv R, Wang K, Huang X, Wu W, Yin L, Liu Y. Cytoglobin exhibits anti- fibrosis activity on liver in vivo and in vitro. <i>Protein J.</i> 2011;30(7):437-46. doi: 10.1007/s10930-011-9340-2                                                                                                                                                                                          | China  |
| 171 | 2011 | Li Y, Deng L, Qian W, Zhou JN, Xu KS. [Effects of exogenous TGF- $\beta$ 3 on the expression of endogenous TGF- $\beta$ 3 in hepatic stellate cell-T6 (HSC-T6)]. <i>Zhonghua Gan Zang Bing Za Zhi</i> 2011;19(11):843-7. Chinese. doi: 10.3760/cma.j.issn.1007-3418.2011.11.012                                                                                                          | China  |
| 172 | 2011 | Liu J, Wang CY, Chen YP, Lin Z, Yang T, Lu XJ. [Dynamic expression of tropomyosin 1 in rat model of hepatic fibrosis and hepatic stellate cells]. <i>Zhonghua Gan Zang Bing Za Zhi</i> 2011;19(11):848-52. Chinese. doi: 10.3760/cma.j.issn.1007-3418.2011.11.013                                                                                                                        | China  |
| 173 | 2011 | Weng TC, Shen CC, Chiu YT, Lin YL, Huang YT. Effects of artemepavine against hepatic fibrosis induced by thioacetamide in rats. <i>Phytother Res.</i> 2012;26(3):344-53. doi: 10.1002/ptr.3539                                                                                                                                                                                           | Taiwan |
| 174 | 2012 | Yang H, Lee PJ, Jeong EJ, Kim HP, Kim YC. Selective apoptosis in hepatic stellate cells mediates the antifibrotic effect of phenanthrenes from <i>Dendrobium nobile</i> . <i>Phytother Res.</i> 2012;26(7):974-80. doi: 10.1002/ptr.3632                                                                                                                                                 | Korea  |
| 175 | 2012 | Pan TL, Wang PW, Leu YL, Wu TH, Wu TS. Inhibitory effects of <i>Scutellaria baicalensis</i> extract on hepatic stellate cells through inducing G2/M cell cycle arrest and activating ERK-dependent apoptosis via Bax and caspase pathway. <i>J Ethnopharmacol.</i> 2012;139(3):829-37. doi: 10.1016/j.jep.2011.12.028. Erratum in: <i>J Ethnopharmacol.</i> 2015;168:381. PMID: 22210104 | Taiwan |
| 176 | 2012 | Tang LX, He RH, Yang G, Tan JJ, Zhou L, Meng XM, Huang XR, Lan HY. Asiatic acid inhibits liver fibrosis by blocking TGF-beta/Smad signaling in vivo and in vitro. <i>PLoS One</i> 2012;7(2):e31350. doi: 10.1371/journal.pone.0031350                                                                                                                                                    | China  |
| 177 | 2012 | Chen H, Zhou Y, Chen KQ, An G, Ji SY, Chen QK. Anti-fibrotic effects via regulation of transcription factor Sp1 on hepatic stellate cells. <i>Cell Physiol Biochem.</i> 2012;29(1-2):51-60. doi: 10.1159/000337586                                                                                                                                                                       | China  |
| 178 | 2012 | Chou MH, Chuang JH, Eng HL, Tsai PC, Hsieh CS, Liu HC, Wang CH, Lin CY, Lin TM. Effects of hepatocyte CD14 upregulation during cholestasis on endotoxin sensitivity. <i>PLoS One</i> 2012;7(4):e34903. doi: 10.1371/journal.pone.0034903                                                                                                                                                 | Taiwan |
| 179 | 2012 | Lee M, Park JH, Min DS, Yoo H, Park JH, Kim YC, Sung SH. Antifibrotic activity of diarylheptanoids from <i>Betula platyphylla</i> toward HSC-T6 cells. <i>Biosci Biotechnol Biochem.</i> 2012;76(9):1616-20. doi: 10.1271/bbb.110887                                                                                                                                                     | Korea  |
| 180 | 2012 | Chen Y, Zheng S, Qi D, Zheng S, Guo J, Zhang S, Weng Z. Inhibition of Notch signaling by a $\gamma$ -secretase inhibitor attenuates                                                                                                                                                                                                                                                      | China  |

|     |      |                                                                                                                                                                                                                                                                                                                                                                                                               |       |
|-----|------|---------------------------------------------------------------------------------------------------------------------------------------------------------------------------------------------------------------------------------------------------------------------------------------------------------------------------------------------------------------------------------------------------------------|-------|
|     |      | hepatic fibrosis in rats. PLoS One 2012;7(10):e46512. doi: <a href="https://doi.org/10.1371/journal.pone.0046512">10.1371/journal.pone.0046512</a>                                                                                                                                                                                                                                                            |       |
| 181 | 2012 | Wan Y, Wu YL, Lian LH, Xie WX, Li X, Ouyang BQ, Bai T, Li Q, Yang N, Nan JX. The anti-fibrotic effect of betulinic acid is mediated through the inhibition of NF- $\kappa$ B nuclear protein translocation. Chem Biol Interact. 2012;195(3):215-23. doi: <a href="https://doi.org/10.1016/j.cbi.2012.01.002">10.1016/j.cbi.2012.01.002</a>                                                                    | China |
| 182 | 2012 | Wang B, Li W, Guo K, Xiao Y, Wang Y, Fan J. miR-181b promotes hepatic stellate cells proliferation by targeting p27 and is elevated in the serum of cirrhosis patients. Biochem Biophys Res Commun. 2012;421(1):4-8. doi: <a href="https://doi.org/10.1016/j.bbrc.2012.03.025">10.1016/j.bbrc.2012.03.025</a>                                                                                                 | China |
| 183 | 2012 | Chen YX, Weng ZH, Zhang SL. Notch3 regulates the activation of hepatic stellate cells. World J Gastroenterol. 2012;18(12):1397-403. doi: <a href="https://doi.org/10.3748/wjg.v18.i12.1397">10.3748/wjg.v18.i12.1397</a>                                                                                                                                                                                      | China |
| 184 | 2012 | Li L, Wang JY, Yang CQ, Jiang W. Effect of RhoA on transforming growth factor $\beta$ 1-induced rat hepatic stellate cell migration. Liver Int. 2012;32(7):1093-102. doi: <a href="https://doi.org/10.1111/j.1478-3231.2012.02809.x">10.1111/j.1478-3231.2012.02809.x</a>                                                                                                                                     | China |
| 185 | 2012 | Tao LL, Cheng YY, Ding D, Mei S, Xu JW, Yu J, Ou-Yang Q, Deng L, Chen Q, Li QQ, Xu ZD, Liu XP. C/EBP- $\alpha$ ameliorates CCl(4)-induced liver fibrosis in mice through promoting apoptosis of hepatic stellate cells with little apoptotic effect on hepatocytes in vitro and in vivo. Apoptosis 2012;17(5):492-502. doi: <a href="https://doi.org/10.1007/s10495-012-0700-y">10.1007/s10495-012-0700-y</a> | China |
| 186 | 2012 | Qin S, Jiang H, Su S, Wang D, Liang Z, Zhang J, Yang W. Inhibition of hepatic stellate cell proliferation by bone marrow mesenchymal stem cells via regulation of the cell cycle in rat. Exp Ther Med. 2012;4(3):375-80. doi: <a href="https://doi.org/10.3892/etm.2012.628">10.3892/etm.2012.628</a>                                                                                                         | China |
| 187 | 2012 | Hao LS, Zhang XL, Wang J, Li LW, Mo YB, Zhang C, Yao DM, Jiang HQ. [The mechanisms of inhibitory effect of adenovirus-mediated wild-type PTEN gene on the proliferation in activated hepatic stellate cells in vitro]. Zhonghua Gan Zang Bing Za Zhi 2012;20(7):503-6. Chinese. doi: <a href="https://doi.org/10.3760/cma.j.issn.1007-3418.2012.07.005">10.3760/cma.j.issn.1007-3418.2012.07.005</a>          | China |
| 188 | 2012 | Zhang L, Zhao LF, Yang H, Zhao JJ. [Effect of reduced glutathione on proliferation of rat hepatic stellate cells and the Nrf2/HO-1 signaling pathway]. Zhonghua Gan Zang Bing Za Zhi. 2012;20(7):507-11. Chinese. doi: <a href="https://doi.org/10.3760/cma.j.issn.1007-3418.2012.07.006">10.3760/cma.j.issn.1007-3418.2012.07.006</a>                                                                        | China |
| 189 | 2012 | Bian EB, Huang C, Ma TT, Tao H, Zhang H, Cheng C, Lv XW, Li J. DNMT1-mediated PTEN hypermethylation confers hepatic stellate cell activation and liver fibrogenesis in rats. Toxicol Appl Pharmacol. 2012;264(1):13-22. doi: <a href="https://doi.org/10.1016/j.taap.2012.06.022">10.1016/j.taap.2012.06.022</a>                                                                                              | China |
| 190 | 2012 | Yang YP, Guan XQ, Qi MM, Zhu LR. [Effects of resistin on hepatic fibrosis: possible mechanisms in non-alcoholic fatty liver disease in in vitro and in vivo]. Dongwuxue Yanjiu 2012;33(4):367-72. Chinese. doi: <a href="https://doi.org/10.3724/SP.J.1141.2012.04367">10.3724/SP.J.1141.2012.04367</a>                                                                                                       | China |
| 191 | 2012 | Jiang YF, Sun HL, Zhang JJ, Huang F, Liu JQ. [Effect of shRNA-mediated silencing of CTGF and TIMP-1 on mRNA expression of CTGF, TIMP-1, and PC I and secretion of extracellular matrix in rat hepatic stellate cells]. Zhonghua Gan Zang Bing Za Zhi                                                                                                                                                          | China |

|     |      |                                                                                                                                                                                                                                                                                                                                         |           |
|-----|------|-----------------------------------------------------------------------------------------------------------------------------------------------------------------------------------------------------------------------------------------------------------------------------------------------------------------------------------------|-----------|
|     |      | 2012;20(8):576-80. Chinese. doi: <a href="https://doi.org/10.3760/cma.j.issn.1007-3418.2012.08.007">10.3760/cma.j.issn.1007-3418.2012.08.007</a>                                                                                                                                                                                        |           |
| 192 | 2012 | Chen YX, Weng ZH, Qi D, Zhang SL. [Effect of Notch signaling on the activation of hepatic stellate cells]. Zhonghua Gan Zang Bing Za Zhi 2012;20(9):677-82. Chinese. doi: <a href="https://doi.org/10.3760/cma.j.issn.1007-3418.2012.09.008">10.3760/cma.j.issn.1007-3418.2012.09.008</a>                                               | China     |
| 193 | 2012 | Zhang L, Wu T, Chen JM, Yang LL, Song HY, Ji G. Danshensu inhibits acetaldehyde-induced proliferation and activation of hepatic stellate cell-T6. Zhong Xi Yi Jie He Xue Bao 2012;10(10):1155-61. doi: <a href="https://doi.org/10.3736/jcim20121013">10.3736/jcim20121013</a>                                                          | China     |
| 194 | 2012 | Yang H, Yoo G, Kim HS, Kim JY, Kim SO, Yoo YH, Sung SH. Implication of the stereoisomers of ginsenoside derivatives in the antiproliferative effect of HSC-T6 cells. J Agric Food Chem. 2012;60(47):11759-64. doi: <a href="https://doi.org/10.1021/jf303714c">10.1021/jf303714c</a>                                                    | Korea     |
| 195 | 2012 | Zhan Q, Zhang F, Sun L, Wu Z, Chen W. Two new oleanane-type triterpenoids from Platycodi Radix and anti-proliferative activity in HSC-T6 cells. Molecules 2012;17(12):14899-907. doi: <a href="https://doi.org/10.3390/molecules171214899">10.3390/molecules171214899</a>                                                               | China     |
| 196 | 2013 | Fan HN, Wang HJ, Yang-Dan CR, Ren L, Wang C, Li YF, Deng Y. Protective effects of hydrogen sulfide on oxidative stress and fibrosis in hepatic stellate cells. Mol Med Rep. 2013;7(1):247-53. doi: <a href="https://doi.org/10.3892/mmr.2012.1153">10.3892/mmr.2012.1153</a>                                                            | China     |
| 197 | 2013 | Chen YC, Liaw CC, Cheng YB, Lin YC, Chen CH, Huang YT, Liou SS, Chen SY, Chien CT, Lee GC, Shen YC. Anti-liver fibrotic lignans from the fruits of Schisandra arisanensis and Schisandra sphenanthera. Bioorg Med Chem Lett. 2013;23(3):880-5. doi: <a href="https://doi.org/10.1016/j.bmcl.2012.11.040">10.1016/j.bmcl.2012.11.040</a> | Taiwan    |
| 198 | 2013 | Liu Q, Ahn JH, Kim SB, Lee C, Hwang BY, Lee MK. Sesquiterpene lactones from the roots of Lindera strychnifolia. Phytochemistry 2013;87:112-8. doi: <a href="https://doi.org/10.1016/j.phytochem.2012.11.004">10.1016/j.phytochem.2012.11.004</a>                                                                                        | Korea     |
| 199 | 2013 | Ding Z, Zhuo L. Attenuation of hepatic fibrosis by an imidazolium salt in thioacetamide-induced mouse model. J Gastroenterol Hepatol. 2013;28(1):188-201. doi: <a href="https://doi.org/10.1111/j.1440-1746.2012.07265.x">10.1111/j.1440-1746.2012.07265.x</a>                                                                          | Singapore |
| 200 | 2013 | Luo Z, Liu H, Sun X, Guo R, Cui R, Ma X, Yan M. RNA interference against discoidin domain receptor 2 ameliorates alcoholic liver disease in rats. PLoS One 2013;8(2):e55860. doi: <a href="https://doi.org/10.1371/journal.pone.0055860">10.1371/journal.pone.0055860</a>                                                               | China     |
| 201 | 2013 | Wang Q, Du H, Li M, Li Y, Liu S, Gao P, Zhang X, Cheng J. MAPK signal transduction pathway regulation: A novel mechanism of rat HSC-T6 cell apoptosis induced by FUZHENGHUAYU tablet. Evid Based Complement Alternat Med. 2013;2013:368103. doi: <a href="https://doi.org/10.1155/2013/368103">10.1155/2013/368103</a>                  | China     |
| 202 | 2013 | Wang Y, Huang Y, Guan F, Xiao Y, Deng J, Chen H, Chen X, Li J, Huang H, Shi C. Hypoxia-inducible factor-1alpha and MAPK co-regulate activation of hepatic stellate cells upon hypoxia stimulation. PLoS One 2013;8(9):e74051. doi: <a href="https://doi.org/10.1371/journal.pone.0074051">10.1371/journal.pone.0074051</a>              | China     |
| 203 | 2013 | Fan X, Zhang Q, Li S, Lv Y, Su H, Jiang H, Hao Z. Attenuation of CCl4-induced hepatic fibrosis in mice by vaccinating against                                                                                                                                                                                                           | China     |

|     |      |                                                                                                                                                                                                                                                                                                                                                                               |           |
|-----|------|-------------------------------------------------------------------------------------------------------------------------------------------------------------------------------------------------------------------------------------------------------------------------------------------------------------------------------------------------------------------------------|-----------|
|     |      | TGF- $\beta$ 1. PLoS One 2013;8(12):e82190. doi: <a href="https://doi.org/10.1371/journal.pone.0082190">10.1371/journal.pone.0082190</a>                                                                                                                                                                                                                                      |           |
| 204 | 2013 | Narmada BC, Chia SM, Tucker-Kellogg L, Yu H. HGF regulates the activation of TGF- $\beta$ 1 in rat hepatocytes and hepatic stellate cells. J Cell Physiol. 2013;228(2):393-401. doi: <a href="https://doi.org/10.1002/jcp.24143">10.1002/jcp.24143</a>                                                                                                                        | Singapore |
| 205 | 2013 | Wang YP, He Q, Wu F, Zhu LL, Liu W, Zhang YN, He YW. [Effects of Wnt3a on proliferation, activation and the expression of TGF $\beta$ /Smad in rat hepatic stellate cells]. Zhonghua Gan Zang Bing Za Zhi. 2013;21(2):111-5. Chinese. doi: <a href="https://doi.org/10.3760/cma.j.issn.1007-3418.2013.02.009">10.3760/cma.j.issn.1007-3418.2013.02.009</a>                    | China     |
| 206 | 2013 | Fan HN, Wang HJ, Ren L, Ren B, Dan CR, Li YF, Hou LZ, Deng Y. Decreased expression of p38 MAPK mediates protective effects of hydrogen sulfide on hepatic fibrosis. Eur Rev Med Pharmacol Sci. 2013;17(5):644-52. PMID: <a href="https://pubmed.ncbi.nlm.nih.gov/23543448/">23543448</a>                                                                                      | China     |
| 207 | 2013 | Tang Y, Hu C, Liu Y. Effect of bioactive peptide of Carapax Trionycis on TGF- $\beta$ 1-induced intracellular events in hepatic stellate cells. J Ethnopharmacol. 2013;148(1):69-73. doi: <a href="https://doi.org/10.1016/j.jep.2013.03.067">10.1016/j.jep.2013.03.067</a>                                                                                                   | China     |
| 208 | 2013 | Zan Y, Zhang Y, Tien P. Hepatitis B virus e antigen induces activation of rat hepatic stellate cells. Biochem Biophys Res Commun. 2013;435(3):391-6. doi: <a href="https://doi.org/10.1016/j.bbrc.2013.04.098">10.1016/j.bbrc.2013.04.098</a>                                                                                                                                 | China     |
| 209 | 2013 | Liu L, Fan H, Qi P, Mei Y, Zhou L, Cai L, Lin X, Lin J. Synthesis and hepatoprotective properties of Acanthus ilicifolius alkaloid A and its derivatives. Exp Ther Med. 2013;6(3):796-802. doi: <a href="https://doi.org/10.3892/etm.2013.1189">10.3892/etm.2013.1189</a>                                                                                                     | China     |
| 210 | 2013 | Zhang WY, Li Y, Li T, Ning ZW, Li W, Li X. [Aldosterone antagonist inhibits fibrosis-induced NOX4 protein expression in hepatic cells and tissues of rats]. Zhonghua Gan Zang Bing Za Zhi 2013;21(7):519-23. Chinese. doi: <a href="https://doi.org/10.3760/cma.j.issn.1007-3418.2013.07.011">10.3760/cma.j.issn.1007-3418.2013.07.011</a>                                    | China     |
| 211 | 2013 | Li XM, Dong L, Shi HT, Gao TJ, Jia M. [Effect of neferine on hepatic stellate cells in collagen-I, TIMP-1 and MMP-2]. Zhongguo Zhong Yao Za Zhi 2013;38(13):2206-9. Chinese. PMID: <a href="https://pubmed.ncbi.nlm.nih.gov/24079255/">24079255</a>                                                                                                                           | China     |
| 212 | 2013 | Bai JX, Dai L, Chen HG, Xu H, Yin RL, Han J, Yuan HL. [Study on rational daily administration frequency of Fufang Biejia Ruangan tablet based on integrated serum pharmacologic and pharmacokinetic model]. Zhongguo Zhong Yao Za Zhi 2013;38(14):2394-8. Chinese. PMID: <a href="https://pubmed.ncbi.nlm.nih.gov/24199579/">24199579</a>                                     | China     |
| 213 | 2013 | Xu L, Zheng N, He Q, Li R, Zhang K, Liang T. Puerarin, isolated from Pueraria lobata (Willd.), protects against hepatotoxicity via specific inhibition of the TGF- $\beta$ 1/Smad signaling pathway, thereby leading to anti- fibrotic effect. Phytomedicine 2013;20(13):1172-9. doi: <a href="https://doi.org/10.1016/j.phymed.2013.06.008">10.1016/j.phymed.2013.06.008</a> | China     |
| 214 | 2013 | Ren ZP, Sun LP, Xia YC, Tong QX. Effect of the protease inhibitor MG132 on the transforming growth factor- $\beta$ /Smad signaling pathway in HSC-T6 cells. J Huazhong Univ Sci Technolog Med Sci. 2013;33(4):501-4. doi: <a href="https://doi.org/10.1007/s11596-013-1149-0">10.1007/s11596-013-1149-0</a>                                                                   | China     |

|     |      |                                                                                                                                                                                                                                                                                                                                                                                      |        |
|-----|------|--------------------------------------------------------------------------------------------------------------------------------------------------------------------------------------------------------------------------------------------------------------------------------------------------------------------------------------------------------------------------------------|--------|
| 215 | 2013 | Liu M, He Y, Zhang J. [Effect of autophagy inhibitor 3-methyladenine on proliferation and activation of hepatic stellate cells]. Xi Bao Yu Fen Zi Mian Yi Xue Za Zhi 2013;29(8):809-12. Chinese. PMID: 23948405                                                                                                                                                                      | China  |
| 216 | 2013 | Fang L, Zhan S, Huang C, Cheng X, Lv X, Si H, Li J. TRPM7 channel regulates PDGF-BB-induced proliferation of hepatic stellate cells via PI3K and ERK pathways. Toxicol Appl Pharmacol. 2013;272(3):713-25. doi: 10.1016/j.taap.2013.08.009                                                                                                                                           | China  |
| 217 | 2013 | Yu HC, Bai L, Yue SQ, Wang DS, Wang L, Han H, Dou KF. Notch signal protects non-parenchymal cells from ischemia/reperfusion injury in vitro by repressing ROS. Ann Hepatol. 2013;12(5):815-21. PMID: 24018501                                                                                                                                                                        | China  |
| 218 | 2013 | Chen MF, Huang CC, Liu PS, Chen CH, Shiu LY. Saikosaponin a and saikosaponin d inhibit proliferation and migratory activity of rat HSC-T6 cells. J Med Food. 2013;16(9):793-800. doi: 10.1089/jmf.2013.2762                                                                                                                                                                          | Taiwan |
| 219 | 2013 | Li Y, Xia JY, Chen W, Deng CL. [Effects of Ling Qi Juan Gan capsule drug- containing serum on PDGF-induced proliferation and JAK/STAT signaling of HSC-T6 cells]. Zhonghua Gan Zang Bing Za Zhi 2013;21(9):663-7. Chinese. doi: 10.3760/cma.j.issn.1007-3418.2013.09.005                                                                                                             | China  |
| 220 | 2013 | Ohtera A, Miyamae Y, Nakai N, Kawachi A, Kawada K, Han J, Isoda H, Neffati M, Akita T, Maejima K, Masuda S, Kambe T, Mori N, Irie K, Nagao M. Identification of 6-octadecynoic acid from a methanol extract of Marrubium vulgare L. as a peroxisome proliferator-activated receptor $\gamma$ agonist. Biochem Biophys Res Commun. 2013;440(2):204-9. doi: 10.1016/j.bbrc.2013.09.003 | Japan  |
| 221 | 2013 | Zhang Z, Gao Z, Hu W, Yin S, Wang C, Zang Y, Chen J, Zhang J, Dong L. 3,3'-Diindolylmethane ameliorates experimental hepatic fibrosis via inhibiting miR-21 expression. Br J Pharmacol. 2013;170(3):649-60. doi: 10.1111/bph.12323                                                                                                                                                   | China  |
| 222 | 2013 | Hong IH, Park SJ, Goo MJ, Lee HR, Park JK, Ki MR, Kim SH, Lee EM, Kim AY, Jeong KS. JNK1 and JNK2 regulate $\alpha$ -SMA in hepatic stellate cells during CCl4 -induced fibrosis in the rat liver. Pathol Int. 2013;63(10):483-91. doi: 10.1111/pin.12094                                                                                                                            | Korea  |
| 223 | 2013 | Feng YJ, Wang YJ, Zhang FC, Zhou C, Quan QZ. [Effect of Hanfangji compound on proliferation of hepatic stellate cells and expressions of TTR, ITIH1 and SERPINF2]. Zhongguo Zhong Yao Za Zhi 2013;38(19):3338-42. Chinese. PMID: 24422404                                                                                                                                            | China  |
| 224 | 2013 | Li Y, Luo Y, Zhang X, Lin X, He M, Liao M. Combined taurine, epigallocatechin gallate and genistein therapy reduces HSC-T6 cell proliferation and modulates the expression of fibrogenic factors. Int J Mol Sci. 2013;14(10):20543-54. doi: 10.3390/ijms141020543. Erratum in: Int J Mol Sci. 2021;22(5): PMID: 24129183                                                             | China  |
| 225 | 2014 | Hao C, Xie Y, Peng M, Ma L, Zhou Y, Zhang Y, Kang W, Wang J, Bai X, Wang P, Jia Z. Inhibition of connective tissue growth factor suppresses hepatic stellate cell activation in vitro and prevents liver fibrosis in vivo. Clin Exp Med. 2014;14(2):141-50. doi: 10.1007/s10238-013-0229-6                                                                                           | China  |

|     |      |                                                                                                                                                                                                                                                                                                                                                                                                                                                                                            |        |
|-----|------|--------------------------------------------------------------------------------------------------------------------------------------------------------------------------------------------------------------------------------------------------------------------------------------------------------------------------------------------------------------------------------------------------------------------------------------------------------------------------------------------|--------|
| 226 | 2014 | Li B, Meng X, Zhu L, Jiao X, Zhang J. Application of high-speed counter- current chromatography for isolation of triterpenes from <i>Schisandra Chinensis</i> (Turcz.) Baill and induction apoptosis mechanism of HSC-T6. <i>Biomed Mater Eng.</i> 2014;24(1):969-77. doi: <a href="https://doi.org/10.3233/BME-130892">10.3233/BME-130892</a>                                                                                                                                             | China  |
| 227 | 2014 | Dong Y, Qu Y, Xu M, Wang X, Lu L. Catalase ameliorates hepatic fibrosis by inhibition of hepatic stellate cells activation. <i>Front Biosci. (Landmark Ed)</i> 2014;19:535-41. doi: <a href="https://doi.org/10.2741/4224">10.2741/4224</a>                                                                                                                                                                                                                                                | China  |
| 228 | 2014 | Jian YC, Wang JJ, Dong S, Hu JW, Hu LJ, Yang GM, Zheng YX, Xiong WJ. Wnt- induced secreted protein 1/CCN4 in liver fibrosis both in vitro and in vivo. <i>Clin Lab.</i> 2014;60(1):29-35. doi: <a href="https://doi.org/10.7754/clin.lab.2013.121035">10.7754/clin.lab.2013.121035</a>                                                                                                                                                                                                     | China  |
| 229 | 2014 | Wang H, Guan W, Yang W, Wang Q, Zhao H, Yang F, Lv X, Li J. Caffeine inhibits the activation of hepatic stellate cells induced by acetaldehyde via adenosine A2A receptor mediated by the cAMP/PKA/SRC/ERK1/2/P38 MAPK signal pathway. <i>PLoS One</i> 2014;9(3):e92482. doi: <a href="https://doi.org/10.1371/journal.pone.0092482">10.1371/journal.pone.0092482</a>                                                                                                                      | China  |
| 230 | 2014 | Zong Y, Zhong M, Li DM, Zhang BJ, Mai ZP, Huo XK, Huang SS, Zhang HL, Wang C, Ma XC, Yu SM, Yang DA. Phenolic constituents from the roots of <i>Phyllodium pulchellum</i> . <i>J Asian Nat Prod Res.</i> 2014;16(7):741-6. doi: <a href="https://doi.org/10.1080/10286020.2014.910197">10.1080/10286020.2014.910197</a>                                                                                                                                                                    | China  |
| 231 | 2014 | Tsai TH, Shih SC, Ho TC, Ma HI, Liu MY, Chen SL, Tsao YP. Pigment epithelium-derived factor 34-mer peptide prevents liver fibrosis and hepatic stellate cell activation through down-regulation of the PDGF receptor. <i>PLoS One</i> 2014;9(4):e95443. doi: <a href="https://doi.org/10.1371/journal.pone.0095443">10.1371/journal.pone.0095443</a> . Erratum in: <i>PLoS One</i> 2014;9(9): doi: <a href="https://doi.org/10.1371/journal.pone.0108835">10.1371/journal.pone.0108835</a> | China  |
| 232 | 2014 | Song Y, Zhan L, Yu M, Huang C, Meng X, Ma T, Zhang L, Li J. TRPV4 channel inhibits TGF- $\beta$ 1-induced proliferation of hepatic stellate cells. <i>PLoS One</i> 2014;9(7):e101179. doi: <a href="https://doi.org/10.1371/journal.pone.0101179">10.1371/journal.pone.0101179</a>                                                                                                                                                                                                         | China  |
| 233 | 2014 | Liu YW, Huang YT. Inhibitory effect of tanshinone IIA on rat hepatic stellate cells. <i>PLoS One</i> 2014;9(7):e103229. doi: <a href="https://doi.org/10.1371/journal.pone.0103229">10.1371/journal.pone.0103229</a>                                                                                                                                                                                                                                                                       | Taiwan |
| 234 | 2014 | Yang MC, Wang CJ, Liao PC, Yen CJ, Shan YS. Hepatic stellate cells secretes type I collagen to trigger epithelial mesenchymal transition of hepatoma cells. <i>Am J Cancer Res.</i> 2014;4(6):751-63. PMID: <a href="https://pubmed.ncbi.nlm.nih.gov/25520865/">25520865</a>                                                                                                                                                                                                               | China  |
| 235 | 2014 | Wang C, Zhong M, Zhang BJ, Huo XK, Huang SS, Yu SM, Ma XC. [Chemical constituents against hepatic fibrosis from <i>Phyllodium pulchellum</i> roots]. <i>Zhong Yao Cai</i> 2014;37(3):424-7. Chinese. PMID: <a href="https://pubmed.ncbi.nlm.nih.gov/25174106/">25174106</a>                                                                                                                                                                                                                | China  |
| 236 | 2014 | Cui X, Zhang X, Yin Q, Meng A, Su S, Jing X, Li H, Guan X, Li X, Liu S, Cheng M. F-actin cytoskeleton reorganization is associated with hepatic stellate cell activation. <i>Mol Med Rep.</i> 2014;9(5):1641-7. doi: <a href="https://doi.org/10.3892/mmr.2014.2036">10.3892/mmr.2014.2036</a>                                                                                                                                                                                             | China  |
| 237 | 2014 | Kuo LM, Kuo CY, Lin CY, Hung MF, Shen JJ, Hwang TL. Intracellular glutathione depletion by oridonin leads to apoptosis in                                                                                                                                                                                                                                                                                                                                                                  | Taiwan |



|     |      |                                                                                                                                                                                                                                                                                                                                                                                      |        |
|-----|------|--------------------------------------------------------------------------------------------------------------------------------------------------------------------------------------------------------------------------------------------------------------------------------------------------------------------------------------------------------------------------------------|--------|
|     |      | hepatic stellate cells. <i>Molecules</i> 2014;19(3):3327-44. doi: <a href="https://doi.org/10.3390/molecules19033327">10.3390/molecules19033327</a>                                                                                                                                                                                                                                  |        |
| 238 | 2014 | Bohanon FJ, Wang X, Ding C, Ding Y, Radhakrishnan GL, Rastellini C, Zhou J, Radhakrishnan RS. Oridonin inhibits hepatic stellate cell proliferation and fibrogenesis. <i>J Surg Res.</i> 2014;190(1):55-63. doi: <a href="https://doi.org/10.1016/j.jss.2014.03.036">10.1016/j.jss.2014.03.036</a>                                                                                   | USA    |
| 239 | 2014 | Su KY, Hsieh CY, Chen YW, Chuang CT, Chen CT, Chen YS. Taiwanese Green Propolis and Propolin G Protect the Liver from the Pathogenesis of Fibrosis via Eliminating TGF- $\beta$ -Induced Smad2/3 Phosphorylation. <i>J Agric Food Chem.</i> 2014;62(14):3192-201. doi: <a href="https://doi.org/10.1021/jf500096c">10.1021/jf500096c</a>                                             | Taiwan |
| 240 | 2014 | Ge WS, Wang YJ, Wu JX, Fan JG, Chen YW, Zhu L. $\beta$ -catenin is overexpressed in hepatic fibrosis and blockage of Wnt/ $\beta$ -catenin signaling inhibits hepatic stellate cell activation. <i>Mol Med Rep.</i> 2014;9(6):2145-51. doi: <a href="https://doi.org/10.3892/mmr.2014.2099">10.3892/mmr.2014.2099</a>                                                                | China  |
| 241 | 2014 | Wang F, Liu S, DU T, Chen H, Li Z, Yan J. NF- $\kappa$ B inhibition alleviates carbon tetrachloride-induced liver fibrosis via suppression of activated hepatic stellate cells. <i>Exp Ther Med.</i> 2014;8(1):95-9. doi: <a href="https://doi.org/10.3892/etm.2014.1682">10.3892/etm.2014.1682</a>                                                                                  | China  |
| 242 | 2014 | Wang XY, Chen GR, Deng ZY, Zhao J, Ge JF, Li N, Chen FH. [Chemical constituents from <i>Bidens bipinnata</i> ]. <i>Zhongguo Zhong Yao Za Zhi</i> 2014;39(10):1838-44. Chinese. PMID: <a href="https://pubmed.ncbi.nlm.nih.gov/25282892/">25282892</a>                                                                                                                                | China  |
| 243 | 2014 | Bai T, Yao YL, Jin XJ, Lian LH, Li Q, Yang N, Jin Q, Wu YL, Nan JX. Acanthoic acid, a diterpene in <i>Acanthopanax koreanum</i> , ameliorates the development of liver fibrosis via LXRs signals. <i>Chem Biol Interact.</i> 2014;218:63-70. doi: <a href="https://doi.org/10.1016/j.cbi.2014.04.016">10.1016/j.cbi.2014.04.016</a>                                                  | China  |
| 244 | 2014 | Chen J, Liu DG, Yang G, Kong LJ, Du YJ, Wang HY, Li FD, Pei FH, Song JT, Fan YJ, Liu AY, Wang XH, Li BX. Endostar, a novel human recombinant endostatin, attenuates liver fibrosis in CCl <sub>4</sub> -induced mice. <i>Exp Biol Med (Maywood)</i> 2014;239(8):998-1006. doi: <a href="https://doi.org/10.1177/1535370214532595">10.1177/1535370214532595</a>                       | China  |
| 245 | 2014 | Wang H, Ren Q, Chen W, Li R, Song L, Zhang N, Qi C, Zheng Y. [Role of PI3K/Akt signaling in hydrogen sulfide-induced alteration in expression of collagen I and III in hepatic stellate cells]. <i>Zhonghua Gan Zang Bing Za Zhi</i> 2014;22(6):430-3. Chinese. doi: <a href="https://doi.org/10.3760/cma.j.issn.1007-3418.2014.06.007">10.3760/cma.j.issn.1007-3418.2014.06.007</a> | China  |
| 246 | 2014 | Zhang Y, Zhang QQ, Guo XH, Zhang HY, Liu LX. IGFBRp1 induces liver fibrosis by inducing hepatic stellate cell activation and hepatocyte apoptosis via Smad2/3 signaling. <i>World J Gastroenterol.</i> 2014;20(21):6523-33. doi: <a href="https://doi.org/10.3748/wjg.v20.i21.6523">10.3748/wjg.v20.i21.6523</a>                                                                     | China  |
| 247 | 2014 | Kao YH, Lin YC, Tsai MS, Sun CK, Yuan SS, Chang CY, Jawan B, Lee PH. Involvement of the nuclear high mobility group B1 peptides released from injured hepatocytes in murine hepatic fibrogenesis. <i>Biochim Biophys Acta</i> 2014;1842(9):1720-32. doi: <a href="https://doi.org/10.1016/j.bbadis.2014.06.017">10.1016/j.bbadis.2014.06.017</a>                                     | Taiwan |
| 248 | 2014 | Zhang LJ, Sun MY, Ning BB, Zhang WM, Chen GF, Mu YP, Zhang H, Liu J, Bian YQ, Liu P. Xiayuxue Decoction ([symbols; see text]) attenuates hepatic stellate cell activation and sinusoidal endothelium defenestration in CCl <sub>4</sub> -induced fibrotic liver of                                                                                                                   | China  |

|     |      |                                                                                                                                                                                                                                                                                    |       |
|-----|------|------------------------------------------------------------------------------------------------------------------------------------------------------------------------------------------------------------------------------------------------------------------------------------|-------|
|     |      | mice. Chin J Integr Med. 2014;20(7):516-23. doi: 10.1007/s11655-014-1862-y                                                                                                                                                                                                         |       |
| 249 | 2014 | Qin W, Deng CL, Chen W, Gan Y. [Effects of lingqijuangan capsule medicated serum on apoptosis of activated rat hepatic stellate cells]. Sichuan Da Xue Xue Bao Yi Xue Ban 2014;45(4):595-600. Chinese. PMID: 25286683                                                              | China |
| 250 | 2014 | Fu MY, He YJ, Lv X, Liu ZH, Shen Y, Ye GR, Deng YM, Shu JC. Transforming growth factor- $\beta$ 1 reduces apoptosis via autophagy activation in hepatic stellate cells. Mol Med Rep. 2014;10(3):1282-8. doi: 10.3892/mmr.2014.2383                                                 | China |
| 251 | 2014 | Huang D, Jiang Y, Chen W, Yao F, Sun L. Polyphenols with anti-proliferative activities from Penthorum chinense Pursh. Molecules 2014;19(8):11045-55. doi: 10.3390/molecules190811045                                                                                               | China |
| 252 | 2014 | Ding X, Chen X, Cao Y, Jia D, Wang D, Zhu Z, Zhang J, Hong Z, Chai Y. Quality improvements of cell membrane chromatographic column. J Chromatogr A. 2014;1359:330-5. doi: 10.1016/j.chroma.2014.07.071                                                                             | China |
| 253 | 2014 | Yang MH, Kim NH, Heo JD, Sung SH, Jeong EJ. Hepatoprotective effects of Limonium tetragonum, edible medicinal halophyte growing near seashores. Pharmacogn Mag. 2014;10(Suppl 3):S563-8. doi: 10.4103/0973-1296.139783                                                             | Korea |
| 254 | 2014 | Fang L, Huang C, Meng X, Wu B, Ma T, Liu X, Zhu Q, Zhan S, Li J. TGF- $\beta$ 1-elevated TRPM7 channel regulates collagen expression in hepatic stellate cells via TGF- $\beta$ 1/Smad pathway. Toxicol Appl Pharmacol. 2014;280(2):335-44. doi: 10.1016/j.taap.2014.08.006        | China |
| 255 | 2014 | Chen G, Wang Y, Li M, Xu T, Wang X, Hong B, Niu Y. Curcumol induces HSC-T6 cell death through suppression of Bcl-2: involvement of PI3K and NF- $\kappa$ B pathways. Eur J Pharm Sci. 2014;65:21-8. doi: 10.1016/j.ejps.2014.09.001                                                | China |
| 256 | 2014 | Dai E, Zhang J, Zhang D, Yang L, Wang Y, Jiang X, Ye L, Li X, Liu H, Ma J, Jiang H. Rimonabant inhibits proliferation, collagen secretion and induces apoptosis in hepatic stellate cells. Hepatogastroenterology 2014;61(135):2052-61. PMID: 25713910                             | China |
| 257 | 2014 | Liu TT, Ding TL, Ma Y, Wei W. Selective $\alpha$ 1B- and $\alpha$ 1D-adrenoceptor antagonists suppress noradrenaline-induced activation, proliferation and ECM secretion of rat hepatic stellate cells in vitro. Acta Pharmacol Sin. 2014;35(11):1385-92. doi: 10.1038/aps.2014.84 | China |
| 258 | 2014 | Jo YH, Shin B, Liu Q, Lee KY, Oh DC, Hwang BY, Lee MK. Antiproliferative prenylated xanthenes and benzophenones from the roots of Cudrania tricuspidata in HSC-T6 cells. J Nat Prod. 2014;77(11):2361-6. doi: 10.1021/np5002797                                                    | Korea |
| 259 | 2014 | Zhao Y, Ma X, Wang J, Zhu Y, Li R, Wang J, He X, Shan L, Wang R, Wang L, Li Y, Xiao X. Paeoniflorin alleviates liver fibrosis by inhibiting HIF-1 $\alpha$ through mTOR-dependent pathway. Fitoterapia 2014;99:318-27. doi: 10.1016/j.fitote.2014.10.009                           | China |
| 260 | 2014 | Jiang Y, Wang C, Li YY, Wang XC, An JD, Wang YJ, Wang XJ. Mistletoe alkaloid fractions alleviates carbon tetrachloride-induced liver fibrosis through inhibition of hepatic stellate cell activation via TGF- $\beta$ /Smad interference. J Ethnopharmacol.                        | China |

|     |      |                                                                                                                                                                                                                                                                                                                                                            |       |
|-----|------|------------------------------------------------------------------------------------------------------------------------------------------------------------------------------------------------------------------------------------------------------------------------------------------------------------------------------------------------------------|-------|
|     |      | 2014;158 Pt A:230-8. doi: <a href="https://doi.org/10.1016/j.jep.2014.10.028">10.1016/j.jep.2014.10.028</a>                                                                                                                                                                                                                                                |       |
| 261 | 2014 | Mai ZP, Wang C, Wang Y, Zhang HL, Zhang BJ, Wang W, Huo XK, Huang SS, Wang CY, Liu KX, Ma XC, Wang XB. Bioactive metabolites of Schisanlactone E transformed by <i>Cunninghamella blakesleana</i> AS 3.970. Fitoterapia 2014;99:352-61. doi: <a href="https://doi.org/10.1016/j.fitote.2014.10.016">10.1016/j.fitote.2014.10.016</a>                       | China |
| 262 | 2014 | Kim HG, Kim JM, Han JM, Lee JS, Choi MK, Lee DS, Park YH, Son CG. Chunggan extract, a traditional herbal formula, ameliorated alcohol-induced hepatic injury in rat model. World J Gastroenterol. 2014;20(42):15703-14. doi: <a href="https://doi.org/10.3748/wjg.v20.i42.15703">10.3748/wjg.v20.i42.15703</a>                                             | Korea |
| 263 | 2015 | Li J, Li X, Xu W, Wang S, Hu Z, Zhang Q, Deng X, Wang J, Zhang J, Guo C. Antifibrotic effects of luteolin on hepatic stellate cells and liver fibrosis by targeting AKT/mTOR/p70S6K and TGF $\beta$ /Smad signalling pathways. Liver Int. 2015;35(4):1222-33. doi: <a href="https://doi.org/10.1111/liv.12638">10.1111/liv.12638</a>                       | China |
| 264 | 2015 | Xu T, Pan Z, Dong M, Yu C, Niu Y. Ferulic acid suppresses activation of hepatic stellate cells through ERK1/2 and Smad signaling pathways in vitro. Biochem Pharmacol. 2015;93(1):49-58. doi: <a href="https://doi.org/10.1016/j.bcp.2014.10.016">10.1016/j.bcp.2014.10.016</a>                                                                            | China |
| 265 | 2015 | Luo J, Zhang C, Zhu H, Jin X, Cao S, Jin M, Jiang Z, Zheng M, Li G. A new chromene from the fruiting bodies of <i>Chroogomphus rutilus</i> . Nat Prod Res. 2015;29(8):698-702. doi: <a href="https://doi.org/10.1080/14786419.2014.981813">10.1080/14786419.2014.981813</a>                                                                                | China |
| 266 | 2015 | Zhang DS, Li YY, Chen XJ, Li YJ, Liu ZY, Xie WJ, Sun ZL. BCL2 promotor methylation and miR-15a/16-1 upregulation is associated with sanguinarine- induced apoptotic death in rat HSC-T6 cells. J Pharmacol Sci. 2015;127(1):135-44. doi: <a href="https://doi.org/10.1016/j.jphs.2014.11.012">10.1016/j.jphs.2014.11.012</a>                               | China |
| 267 | 2015 | Jeong EJ, Kim NH, Heo JD, Lee KY, Rho JR, Kim YC, Sung SH. Antifibrotic compounds from <i>Liriodendron tulipifera</i> attenuating HSC-T6 proliferation and TNF- $\alpha$ production in RAW264.7 cells. Biol Pharm Bull. 2015;38(2):228-34. doi: <a href="https://doi.org/10.1248/bpb.b14-00583">10.1248/bpb.b14-00583</a>                                  | Korea |
| 268 | 2015 | Cheng J, Wang M, Ma H, Li H, Ren J, Wang R. [Adiponectin inhibits oxidative stress and modulates TGF- $\beta$ 1 and COL-1 expression via the AMPK pathway in HSC-T6 cells]. Zhonghua Gan Zang Bing Za Zhi. 2015;23(1):69-72. Chinese. doi: <a href="https://doi.org/10.3760/cma.j.issn.1007-3418.2015.01.016">10.3760/cma.j.issn.1007-3418.2015.01.016</a> | China |
| 269 | 2015 | Xu Y, Peng Z, Ji W, Li X, Lin X, Qian L, Li X, Chai X, Wu Q, Gao Q, Su C. A novel matrine ferivative WM130 inhibits activation of hepatic stellate cells and attenuates dimethylnitrosamine-induced liver fibrosis in rats. Biomed Res Int. 2015;2015:203978. doi: <a href="https://doi.org/10.1155/2015/203978">10.1155/2015/203978</a>                   | China |
| 270 | 2015 | Yang MF, Li DF, Nie YQ. Research of inhibition of survivin in rat HSC-T6 cell by siRNA interference. Bratisl Lek Listy 2015;116(7):446-50. doi: <a href="https://doi.org/10.4149/bll_2015_084">10.4149/bll_2015_084</a>                                                                                                                                    | China |

|     |      |                                                                                                                                                                                                                                                                                                                                                                                                                                                          |                |
|-----|------|----------------------------------------------------------------------------------------------------------------------------------------------------------------------------------------------------------------------------------------------------------------------------------------------------------------------------------------------------------------------------------------------------------------------------------------------------------|----------------|
| 271 | 2015 | Stone LC, Thorne LS, Weston CJ, Graham M, Hodges NJ. Cytochrome expression in the hepatic stellate cell line HSC-T6 is regulated by extracellular matrix proteins dependent on FAK-signalling. <i>Fibrogenesis Tissue Repair</i> 2015;8:15. doi: <a href="https://doi.org/10.1186/s13069-015-0032-y">10.1186/s13069-015-0032-y</a>                                                                                                                       | UK             |
| 272 | 2015 | He W, Shi F, Zhou ZW, Li B, Zhang K, Zhang X, Ouyang C, Zhou SF, Zhu X. A bioinformatic and mechanistic study elicits the antifibrotic effect of ursolic acid through the attenuation of oxidative stress with the involvement of ERK, PI3K/Akt, and p38 MAPK signaling pathways in human hepatic stellate cells and rat liver. <i>Drug Des Devel Ther.</i> 2015;9:3989-4104. doi: <a href="https://doi.org/10.2147/DDDT.S85426">10.2147/DDDT.S85426</a> | China /<br>USA |
| 273 | 2015 | Hu J, Cao G, Wu X, Cai H, Cai B. Tetramethylpyrazine inhibits activation of hepatic stellate cells through Hedgehog signaling pathways in vitro. <i>Biomed Res Int.</i> 2015;2015:603067. doi: <a href="https://doi.org/10.1155/2015/603067">10.1155/2015/603067</a>                                                                                                                                                                                     | China          |
| 274 | 2015 | Chen S, Chen Y, Chen B, Cai YJ, Zou ZL, Wang JG, Lin Z, Wang XD, Fu LY, Hu YR, Chen YP, Chen DZ. Plumbagin ameliorates CCl4-induced hepatic fibrosis in rats via the epidermal growth factor receptor signaling pathway. <i>Evid Based Complement Alternat Med.</i> 2015;2015:645727. doi: <a href="https://doi.org/10.1155/2015/645727">10.1155/2015/645727</a>                                                                                         | China          |
| 275 | 2015 | Tao LL, Zhai YZ, Ding D, Yin WH, Liu XP, Yu GY. The role of C/EBP- $\alpha$ expression in human liver and liver fibrosis and its relationship with autophagy. <i>Int J Clin Exp Pathol.</i> 2015;8(10):13102-7. PMID: <a href="https://pubmed.ncbi.nlm.nih.gov/26722507/">26722507</a>                                                                                                                                                                   | China          |
| 276 | 2015 | Xie WL, Jiang R, Shen XL, Chen ZY, Deng XM. Diosgenin attenuates hepatic stellate cell activation through transforming growth factor- $\beta$ /Smad signaling pathway. <i>Int J Clin Exp Med.</i> 2015;8(11):20323-9. PMID: <a href="https://pubmed.ncbi.nlm.nih.gov/26884947/">26884947</a>                                                                                                                                                             | China          |
| 277 | 2015 | Li J, Dong N, Cheng S, Li X, Wang W, Xiang Y. Tetramethylpyrazine inhibits CTGF and Smad2/3 expression and proliferation of hepatic stellate cells. <i>Biotechnol Biotechnol Equip.</i> 2015;29(1):124-31. doi: <a href="https://doi.org/10.1080/13102818.2014.984382">10.1080/13102818.2014.984382</a>                                                                                                                                                  | China          |
| 278 | 2015 | Lee PJ, Woo SJ, Jee JG, Sung SH, Kim HP. Bisdemethoxycurcumin Induces apoptosis in activated hepatic stellate cells via cannabinoid receptor 2. <i>Molecules</i> 2015;20(1):1277-92. doi: <a href="https://doi.org/10.3390/molecules20011277">10.3390/molecules20011277</a>                                                                                                                                                                              | Korea          |
| 279 | 2015 | Zhan L, Yang Y, Ma TT, Huang C, Meng XM, Zhang L, Li J. Transient receptor potential vanilloid 4 inhibits rat HSC-T6 apoptosis through induction of autophagy. <i>Mol Cell Biochem.</i> 2015;402(1-2):9-22. doi: <a href="https://doi.org/10.1007/s11010-014-2298-6">10.1007/s11010-014-2298-6</a>                                                                                                                                                       | China          |
| 280 | 2015 | Zhang K, Zhang YQ, Ai WB, Hu QT, Zhang QJ, Wan LY, Wang XL, Liu CB, Wu JF. Hes1, an important gene for activation of hepatic stellate cells, is regulated by Notch1 and TGF- $\beta$ /BMP signaling. <i>World J Gastroenterol.</i> 2015;21(3):878-87. doi: <a href="https://doi.org/10.3748/wjg.v21.i3.878">10.3748/wjg.v21.i3.878</a>                                                                                                                   | China          |
| 281 | 2015 | Chong LW, Hsu YC, Lee TF, Lin Y, Chiu YT, Yang KC, Wu JC, Huang YT. Fluvastatin attenuates hepatic steatosis-induced fibrogenesis in rats through inhibiting paracrine effect of hepatocyte on hepatic stellate cells. <i>BMC Gastroenterol.</i> 2015;15:22. doi: <a href="https://doi.org/10.1186/s12876-015-0248-8">10.1186/s12876-015-0248-8</a>                                                                                                      | Taiwan         |

|     |      |                                                                                                                                                                                                                                                                                                                                                           |       |
|-----|------|-----------------------------------------------------------------------------------------------------------------------------------------------------------------------------------------------------------------------------------------------------------------------------------------------------------------------------------------------------------|-------|
| 282 | 2015 | Lu CH, Hou QR, Deng LF, Fei C, Xu WP, Zhang Q, Wu KM, Ning BF, Xie WF, Zhang X. MicroRNA-370 attenuates hepatic fibrogenesis by targeting smoothened. <i>Dig Dis Sci.</i> 2015;60(7):2038-48. doi: <a href="https://doi.org/10.1007/s10620-015-3585-0">10.1007/s10620-015-3585-0</a>                                                                      | China |
| 283 | 2015 | Lin X, Kong LN, Huang C, Ma TT, Meng XM, He Y, Wang QQ, Li J. Hesperetin derivative-7 inhibits PDGF-BB-induced hepatic stellate cell activation and proliferation by targeting Wnt/ $\beta$ -catenin pathway. <i>Int Immunopharmacol.</i> 2015;25(2):311-20. doi: <a href="https://doi.org/10.1016/j.intimp.2015.02.009">10.1016/j.intimp.2015.02.009</a> | China |
| 284 | 2015 | Xiang XH, Jiang TP, Zhang S, Song J, Li X, Yang JY, Zhou S. Pirfenidone inhibits proliferation, arrests the cell cycle, and downregulates heat shock protein-47 and collagen type I in rat hepatic stellate cells in vitro. <i>Mol Med Rep.</i> 2015;12(1):309-14. doi: <a href="https://doi.org/10.3892/mmr.2015.3403">10.3892/mmr.2015.3403</a>         | China |
| 285 | 2015 | Wang J, Chu ES, Chen HY, Man K, Go MY, Huang XR, Lan HY, Sung JJ, Yu J. microRNA-29b prevents liver fibrosis by attenuating hepatic stellate cell activation and inducing apoptosis through targeting PI3K/AKT pathway. <i>Oncotarget</i> 2015;6(9):7325-38. doi: <a href="https://doi.org/10.18632/oncotarget.2621">10.18632/oncotarget.2621</a>         | China |
| 286 | 2015 | Ren B, Fan HN, Deng Y, Wang HJ, Ren L. [Effect of Echinococcus multilocularis Cyst Fluid on the Expression of Five MAPK-pathway Genes of Rat Hepatic Stellate Cells]. <i>Zhongguo Ji Sheng Chong Xue Yu Ji Sheng Chong Bing Za Zhi</i> 2015;33(2):114-7, 121. Chinese. PMID: <a href="https://pubmed.ncbi.nlm.nih.gov/26245121/">26245121</a>             | China |
| 287 | 2015 | Zhang X, Han X, Yin L, Xu L, Qi Y, Xu Y, Sun H, Lin Y, Liu K, Peng J. Potent effects of dioscin against liver fibrosis. <i>Sci Rep.</i> 2015;5:9713. doi: <a href="https://doi.org/10.1038/srep09713">10.1038/srep09713</a>                                                                                                                               | China |
| 288 | 2015 | Chen Z, Jin W, Liu H, Zhao Z, Cheng K. Discovery of Peptide ligands for hepatic stellate cells using phage display. <i>Mol Pharm.</i> 2015;12(6):2180-8. doi: <a href="https://doi.org/10.1021/acs.molpharmaceut.5b00177">10.1021/acs.molpharmaceut.5b00177</a>                                                                                           | USA   |
| 289 | 2015 | Liu K, Guo MG, Lou XL, Li XY, Xu Y, Ji WD, Huang XD, Yang JH, Duan JC. Hepatocyte nuclear factor 4 $\alpha$ induces a tendency of differentiation and activation of rat hepatic stellate cells. <i>World J Gastroenterol.</i> 2015;21(19):5856-66. doi: <a href="https://doi.org/10.3748/wjg.v21.i19.5856">10.3748/wjg.v21.i19.5856</a>                   | China |
| 290 | 2015 | He Y, Zhu J, Huang Y, Gao H, Zhao Y. Advanced glycation end product (AGE)-induced hepatic stellate cell activation via autophagy contributes to hepatitis C-related fibrosis. <i>Acta Diabetol.</i> 2015;52(5):959-69. doi: <a href="https://doi.org/10.1007/s00592-015-0763-7">10.1007/s00592-015-0763-7</a>                                             | China |
| 291 | 2015 | Li Y, Liu F, Ding F, Chen P, Tang M. Inhibition of liver fibrosis using vitamin A-coupled liposomes to deliver matrix metalloproteinase-2 siRNA in vitro. <i>Mol Med Rep.</i> 2015;12(3):3453-61. doi: <a href="https://doi.org/10.3892/mmr.2015.3842">10.3892/mmr.2015.3842</a>                                                                          | China |
| 292 | 2015 | Huang H, Zhou J, Cui Z, Wang B, Hu Y. Angiotensin II type 1 receptor- associated protein plays a role in regulating the local renin-angiotensin system in HSC-T6 cells. <i>Mol Med Rep.</i> 2015;12(3):3763-68. doi: <a href="https://doi.org/10.3892/mmr.2015.3849">10.3892/mmr.2015.3849</a>                                                            | China |

|     |      |                                                                                                                                                                                                                                                                                                                                                                                     |         |
|-----|------|-------------------------------------------------------------------------------------------------------------------------------------------------------------------------------------------------------------------------------------------------------------------------------------------------------------------------------------------------------------------------------------|---------|
| 293 | 2015 | Anavi S, Eisenberg-Bord M, Hahn-Obercyger M, Genin O, Pines M, Tirosh O. The role of iNOS in cholesterol-induced liver fibrosis. <i>Lab Invest.</i> 2015;95(8):914-24. doi: <a href="https://doi.org/10.1038/labinvest.2015.67">10.1038/labinvest.2015.67</a>                                                                                                                       | Israel  |
| 294 | 2015 | Wang Q, Wen R, Lin Q, Wang N, Lu P, Zhu X. Wogonoside shows antifibrotic effects in an experimental regression model of hepatic fibrosis. <i>Dig Dis Sci.</i> 2015;60(11):3329-39. doi: <a href="https://doi.org/10.1007/s10620-015-3751-4">10.1007/s10620-015-3751-4</a>                                                                                                           | China   |
| 295 | 2015 | Wu FR, Jiang L, He XL, Zhu PL, Li J. Effect of hesperidin on TGF-beta1/Smad signaling pathway in HSC. <i>Zhongguo Zhong Yao Za Zhi.</i> 2015;40(13):2639-43. PMID: <a href="https://pubmed.ncbi.nlm.nih.gov/26697692/">26697692</a>                                                                                                                                                 | China   |
| 296 | 2015 | Liu YW, Chiu YT, Fu SL, Huang YT. Osthole ameliorates hepatic fibrosis and inhibits hepatic stellate cell activation. <i>J Biomed Sci.</i> 2015;22(1):63. doi: <a href="https://doi.org/10.1186/s12929-015-0168-5">10.1186/s12929-015-0168-5</a>                                                                                                                                    | Taiwan  |
| 297 | 2015 | Lin YC, Luo HY, Jin QX. [Study on effect of total flavanones of <i>Sedum sarmentosum</i> on apoptosis of hepatic stellate cells and its mechanism]. <i>Zhongguo Zhong Yao Za Zhi</i> 2015;40(16):3273-7. Chinese. PMID: <a href="https://pubmed.ncbi.nlm.nih.gov/26790306/">26790306</a>                                                                                            | China   |
| 298 | 2015 | Bohanon FJ, Wang X, Graham BM, Ding C, Ding Y, Radhakrishnan GL, Rastellini C, Zhou J, Radhakrishnan RS. Enhanced effects of novel oridonin analog CYD0682 for hepatic fibrosis. <i>J Surg Res.</i> 2015;199(2):441-9. doi: <a href="https://doi.org/10.1016/j.jss.2015.07.042">10.1016/j.jss.2015.07.042</a>                                                                       | USA     |
| 299 | 2015 | Lu L, Wang J, Lu H, Zhang G, Liu Y, Wang J, Zhang Y, Shang H, Ji H, Chen X, Duan Y, Li Y. MicroRNA-130a and -130b enhance activation of hepatic stellate cells by suppressing PPAR $\gamma$ expression: A rat fibrosis model study. <i>Biochem Biophys Res Commun.</i> 2015;465(3):387-93. doi: <a href="https://doi.org/10.1016/j.bbrc.2015.08.012">10.1016/j.bbrc.2015.08.012</a> | China   |
| 300 | 2015 | Liu LH, Lai QN, Chen JY, Zhang JX, Cheng B. Overexpression of pim-3 and protective role in lipopolysaccharide-stimulated hepatic stellate cells. <i>World J Gastroenterol.</i> 2015;21(29):8858-67. doi: <a href="https://doi.org/10.3748/wjg.v21.i29.8858">10.3748/wjg.v21.i29.8858</a>                                                                                            | China   |
| 301 | 2015 | Wang Y, Zhang X, Yang Y, Yang X, Ye B. Study on the antifibrotic effects of recombinant shark hepatic stimulator analogue (r-sHSA) in vitro and in vivo. <i>Mar Drugs</i> 2015;13(8):5201-18. doi: <a href="https://doi.org/10.3390/md13085201">10.3390/md13085201</a>                                                                                                              | China   |
| 302 | 2015 | Lu S, Cheng M, Yang D, Liu Y, Guan L, Wu J. [Effects of blueberry on apoptosis and expression of Bcl-2 and Bax in HSC-T6]. <i>Zhonghua Yi Xue Za Zhi</i> 2015;95(31):2560-4. Chinese. PMID: <a href="https://pubmed.ncbi.nlm.nih.gov/26711393/">26711393</a>                                                                                                                        | China   |
| 303 | 2015 | Eichmann TO, Grumet L, Taschler U, Hartler J, Heier C, Woblistin A, Pajed L, Kollroser M, Rechberger G, Thallinger GG, Zechner R, Haemmerle G, Zimmermann R, Lass A. ATGL and CGI-58 are lipid droplet proteins of the hepatic stellate cell line HSC-T6. <i>J Lipid Res.</i> 2015;56(10):1972-84. doi: <a href="https://doi.org/10.1194/jlr.M062372">10.1194/jlr.M062372</a>       | Austria |
| 304 | 2015 | Bohanon FJ, Wang X, Graham BM, Prasai A, Vasudevan SJ, Ding C, Ding Y, Radhakrishnan GL, Rastellini C, Zhou J, Radhakrishnan RS. Enhanced anti-fibrogenic effects of novel oridonin derivative CYD0692 in hepatic stellate cells. <i>Mol Cell Biochem.</i> 2015;410(1-2):293-300. doi: <a href="https://doi.org/10.1007/s11010-015-2562-4">10.1007/s11010-015-2562-4</a>            | USA     |



|     |      |                                                                                                                                                                                                                                                                                                                                                                                                                      |                |
|-----|------|----------------------------------------------------------------------------------------------------------------------------------------------------------------------------------------------------------------------------------------------------------------------------------------------------------------------------------------------------------------------------------------------------------------------|----------------|
| 305 | 2015 | Choi JS, Kim JK, Yang YJ, Kim Y, Kim P, Park SG, Cho EY, Lee DH, Choi JW. Identification of cromolyn sodium as an anti-fibrotic agent targeting both hepatocytes and hepatic stellate cells. <i>Pharmacol Res.</i> 2015;102:176-83. doi: <a href="https://doi.org/10.1016/j.phrs.2015.10.002">10.1016/j.phrs.2015.10.002</a>                                                                                         | Korea          |
| 306 | 2015 | He YJ, Kuchta K, Lv X, Lin Y, Ye GR, Liu XY, Song HD, Wang LX, Kobayashi Y, Shu JC. Curcumin, the main active constituent of turmeric ( <i>Curcuma longa</i> L.), induces apoptosis in hepatic stellate cells by modulating the abundance of apoptosis-related growth factors. <i>Z Naturforsch C J Biosci.</i> 2015;70(11-12):281-5. doi: <a href="https://doi.org/10.1515/znc-2015-4143">10.1515/znc-2015-4143</a> | China / Japan  |
| 307 | 2015 | You SP, Zhao J, Ma L, Tudimat M, Zhang SL, Liu T. Preventive effects of phenylethanol glycosides from <i>Cistanche tubulosa</i> on bovine serum albumin-induced hepatic fibrosis in rats. <i>Daru</i> 2015;23:52. doi: <a href="https://doi.org/10.1186/s40199-015-0135-4">10.1186/s40199-015-0135-4</a>                                                                                                             | China          |
| 308 | 2015 | Liu M, Xu Y, Han X, Yin L, Xu L, Qi Y, Zhao Y, Liu K, Peng J. Dioscin alleviates alcoholic liver fibrosis by attenuating hepatic stellate cell activation via the TLR4/MyD88/NF- $\kappa$ B signaling pathway. <i>Sci Rep.</i> 2015;5:18038. doi: <a href="https://doi.org/10.1038/srep18038">10.1038/srep18038</a> . Erratum in: <i>Sci Rep.</i> 2020;10(1):18384. PMID: 26655640                                   | China          |
| 309 | 2016 | Chen J, Liu DG, Wang H, Wu XN, Cong M, You H, Jia JD. NIM811 downregulates transforming growth factor- $\beta$ signal transduction in vivo and in vitro. <i>Mol Med Rep.</i> 2016;13(1):522-8. doi: <a href="https://doi.org/10.3892/mmr.2015.4572">10.3892/mmr.2015.4572</a>                                                                                                                                        | China          |
| 310 | 2016 | Liu Z, Dou W, Zheng Y, Wen Q, Qin M, Wang X, Tang H, Zhang R, Lv D, Wang J, Zhao S. Curcumin upregulates Nrf2 nuclear translocation and protects rat hepatic stellate cells against oxidative stress. <i>Mol Med Rep.</i> 2016;13(2):1717-24. doi: <a href="https://doi.org/10.3892/mmr.2015.4690">10.3892/mmr.2015.4690</a>                                                                                         | China          |
| 311 | 2016 | Chen PJ, Cai SP, Yang Y, Li WX, Huang C, Meng XM, Li J. PTP1B confers liver fibrosis by regulating the activation of hepatic stellate cells. <i>Toxicol Appl Pharmacol.</i> 2016;292:8-18. doi: <a href="https://doi.org/10.1016/j.taap.2015.12.021">10.1016/j.taap.2015.12.021</a>                                                                                                                                  | China          |
| 312 | 2016 | Gu L, Tao X, Xu Y, Han X, Qi Y, Xu L, Yin L, Peng J. Dioscin alleviates BDL- and DMN-induced hepatic fibrosis via Sirt1/Nrf2-mediated inhibition of p38 MAPK pathway. <i>Toxicol Appl Pharmacol.</i> 2016;292:19-29. doi: <a href="https://doi.org/10.1016/j.taap.2015.12.024">10.1016/j.taap.2015.12.024</a> . Erratum in: <i>Toxicol Appl Pharmacol.</i> 2019;380:114708. PMID: 26747300                           | China          |
| 313 | 2016 | Jia D, Ni YR, Zhang YQ, Rao C, Hou J, Tang HQ, Liu CB, Wu JF. SP1 and UTE1 Decoy ODNs inhibit activation and proliferation of hepatic stellate cells by targeting tissue inhibitors of metalloproteinase 1. <i>Cell Biosci.</i> 2016;6:31. doi: <a href="https://doi.org/10.1186/s13578-016-0094-6">10.1186/s13578-016-0094-6</a>                                                                                    | China          |
| 314 | 2016 | Su M, Chao G, Liang M, Song J, Wu K. Anticytoproliferative effect of Vitamin C on rat hepatic stellate cell. <i>Am J Transl Res.</i> 2016;8(6):2820-5. PMID: 27398165                                                                                                                                                                                                                                                | China          |
| 315 | 2016 | Peterová E, Podmolíková L, Řezáčová M, Mrkvicová A. Fibroblast growth factor-1 suppresses TGF- $\beta$ -mediated myofibroblastic differentiation of rat hepatic stellate cells. <i>Acta Medica (Hradec Kralove)</i> 2016;59(4):124-32. doi: <a href="https://doi.org/10.14712/18059694.2017.39">10.14712/18059694.2017.39</a>                                                                                        | Czech Republic |

|     |      |                                                                                                                                                                                                                                                                                                                                                                                |        |
|-----|------|--------------------------------------------------------------------------------------------------------------------------------------------------------------------------------------------------------------------------------------------------------------------------------------------------------------------------------------------------------------------------------|--------|
| 316 | 2016 | Yu F, Lu Z, Huang K, Wang X, Xu Z, Chen B, Dong P, Zheng J. MicroRNA-17-5p-activated Wnt/ $\beta$ -catenin pathway contributes to the progression of liver fibrosis. <i>Oncotarget</i> 2016;7(1):81-93. doi: <a href="https://doi.org/10.18632/oncotarget.6447">10.18632/oncotarget.6447</a>                                                                                   | China  |
| 317 | 2016 | Wang H, Liu S, Wang Y, Chang B, Wang B. Nod-like receptor protein 3 inflammasome activation by Escherichia coli RNA induces transforming growth factor beta 1 secretion in hepatic stellate cells. <i>Bosn J Basic Med Sci.</i> 2016;16(2):126-31. doi: <a href="https://doi.org/10.17305/bjbms.2016.699">10.17305/bjbms.2016.699</a>                                          | China  |
| 318 | 2016 | Zhang X, Zhang J, Jia L, Xiao S. Dicliptera Chinensis polysaccharides target TGF- $\beta$ /Smad pathway and inhibit stellate cells activation in rats with dimethylnitrosamine-induced hepatic fibrosis. <i>Cell Mol Biol. (Noisy-le-grand)</i> 2016;62(1):99-103. PMID: <a href="https://pubmed.ncbi.nlm.nih.gov/26828995/">26828995</a>                                      | China  |
| 319 | 2016 | Chen L, Guo YZ, Li AD, Ma JJ, Hao HY, Zhang D, Wang Y, Ji CG, Qi W, Wang J, Jiang HQ. Knockdown of astrocyte elevated gene-1 inhibits activation of hepatic stellate cells. <i>Dig Dis Sci.</i> 2016;61(7):1961-71. doi: <a href="https://doi.org/10.1007/s10620-016-4075-8">10.1007/s10620-016-4075-8</a>                                                                     | China  |
| 320 | 2016 | Zhou D, He LN, Wang J, Ding YN, Chen YW, Fan JG. [Binding characteristics of chemosynthetic Ac-SDKP analogue FAM-Aca-SDKP to hepatic stellate cell-T6 cells]. <i>Zhonghua Gan Zang Bing Za Zhi</i> 2016;24(3):186-90. Chinese. doi: <a href="https://doi.org/10.3760/cma.j.issn.1007-3418.2016.03.006">10.3760/cma.j.issn.1007-3418.2016.03.006</a>                            | China  |
| 321 | 2016 | Yuan J, Liu YY, Ma XJ, Li JB. [Effect of high fat on fibrosis in rat hepatic stellate cells]. <i>Zhonghua Gan Zang Bing Za Zhi</i> 2016;24(3):191-5. Chinese. doi: <a href="https://doi.org/10.3760/cma.j.issn.1007-3418.2016.03.007">10.3760/cma.j.issn.1007-3418.2016.03.007</a>                                                                                             | China  |
| 322 | 2016 | Tai CJ, Choong CY, Lin YC, Shi YC, Tai CJ. The anti-hepatic fibrosis activity of ergosterol depended on upregulation of PPARgamma in HSC-T6 cells. <i>Food Funct.</i> 2016;7(4):1915-23. doi: <a href="https://doi.org/10.1039/c6fo00117c">10.1039/c6fo00117c</a>                                                                                                              | Taiwan |
| 323 | 2016 | Wu P, Huang R, Xiong YL, Wu C. Protective effects of curcumin against liver fibrosis through modulating DNA methylation. <i>Chin J Nat Med.</i> 2016;14(4):255-64. doi: <a href="https://doi.org/10.1016/S1875-5364(16)30025-5">10.1016/S1875-5364(16)30025-5</a>                                                                                                              | China  |
| 324 | 2016 | Jia Y, Yuan L, Xu T, Li H, Yang G, Jiang M, Zhang C, Li C. Herbal medicine Gan-fu-kang downregulates Wnt/Ca <sup>2+</sup> signaling to attenuate liver fibrogenesis in vitro and in vivo. <i>Mol Med Rep.</i> 2016;13(6):4705-14. doi: <a href="https://doi.org/10.3892/mmr.2016.5148">10.3892/mmr.2016.5148</a>                                                               | China  |
| 325 | 2016 | Zhang Y, Zhao X, Chang Y, Zhang Y, Chu X, Zhang X, Liu Z, Guo H, Wang N, Gao Y, Zhang J, Chu L. Calcium channel blockers ameliorate iron overload- associated hepatic fibrosis by altering iron transport and stellate cell apoptosis. <i>Toxicol Appl Pharmacol.</i> 2016;301:50-60. doi: <a href="https://doi.org/10.1016/j.taap.2016.04.008">10.1016/j.taap.2016.04.008</a> | China  |
| 326 | 2016 | He YH, Li Z, Ni MM, Zhang XY, Li MF, Meng XM, Huang C, Li J. Cryptolepine derivative-6h inhibits liver fibrosis in TGF- $\beta$ 1-induced HSC-T6 cells by targeting the Shh pathway. <i>Can J Physiol Pharmacol.</i> 2016;94(9):987-95. doi: <a href="https://doi.org/10.1139/cjpp-2016-0157">10.1139/cjpp-2016-0157</a>                                                       | China  |
| 327 | 2016 | Li X, Jin Q, Wu YL, Sun P, Jiang S, Zhang Y, Zhang DQ, Zhang YJ, Lian LH, Nan JX. Tetrandrine regulates hepatic stellate cell                                                                                                                                                                                                                                                  | China  |

|     |      |                                                                                                                                                                                                                                                                                                                                                  |        |
|-----|------|--------------------------------------------------------------------------------------------------------------------------------------------------------------------------------------------------------------------------------------------------------------------------------------------------------------------------------------------------|--------|
|     |      | activation via TAK1 and NF- $\kappa$ B signaling. <i>Int Immunopharmacol.</i> 2016;36:263-70. doi: <a href="https://doi.org/10.1016/j.intimp.2016.04.039">10.1016/j.intimp.2016.04.039</a>                                                                                                                                                       |        |
| 328 | 2016 | Yang JJ, Liu LP, Tao H, Hu W, Shi P, Deng ZY, Li J. MeCP2 silencing of LncRNA H19 controls hepatic stellate cell proliferation by targeting IGF1R. <i>Toxicology</i> 2016;359-360:39-46. doi: <a href="https://doi.org/10.1016/j.tox.2016.06.016">10.1016/j.tox.2016.06.016</a>                                                                  | China  |
| 329 | 2016 | Miyamae Y, Nishito Y, Nakai N, Nagumo Y, Usui T, Masuda S, Kambe T, Nagao M. Tetrandrine induces lipid accumulation through blockade of autophagy in a hepatic stellate cell line. <i>Biochem Biophys Res Commun.</i> 2016;477(1):40-6. doi: <a href="https://doi.org/10.1016/j.bbrc.2016.06.018">10.1016/j.bbrc.2016.06.018</a>                 | Japan  |
| 330 | 2016 | Zhou DD, Wang X, Wang Y, Xiang XJ, Liang ZC, Zhou Y, Xu A, Bi CH, Zhang L. MicroRNA-145 inhibits hepatic stellate cell activation and proliferation by targeting ZEB2 through Wnt/ $\beta$ -catenin pathway. <i>Mol Immunol.</i> 2016;75:151-60. doi: <a href="https://doi.org/10.1016/j.molimm.2016.05.018">10.1016/j.molimm.2016.05.018</a>    | China  |
| 331 | 2016 | Huang Q, Wei L, Liang C, Nie J, Lu S, Lu C, Tan S, Lv S, Zhuo L, Lu Z, Lin X. Loss of Raf kinase inhibitor protein is associated with malignant progression in hepatic fibrosis. <i>Biomed Pharmacother.</i> 2016;82:669-76. doi: <a href="https://doi.org/10.1016/j.biopha.2016.06.007">10.1016/j.biopha.2016.06.007</a>                        | China  |
| 332 | 2016 | Feng Y, Ying HY, Qu Y, Cai XB, Xu MY, Lu LG. Novel matrine derivative MD-1 attenuates hepatic fibrosis by inhibiting EGFR activation of hepatic stellate cells. <i>Protein Cell.</i> 2016;7(9):662-72. doi: <a href="https://doi.org/10.1007/s13238-016-0285-2">10.1007/s13238-016-0285-2</a>                                                    | China  |
| 333 | 2016 | Wu YL, Zhang YJ, Yao YL, Li ZM, Han X, Lian LH, Zhao YQ, Nan JX. Cucurbitacin E ameliorates hepatic fibrosis in vivo and in vitro through activation of AMPK and blocking mTOR-dependent signaling pathway. <i>Toxicol Lett.</i> 2016;258:147-58. doi: <a href="https://doi.org/10.1016/j.toxlet.2016.06.2102">10.1016/j.toxlet.2016.06.2102</a> | China  |
| 334 | 2016 | Wan LY, Zhang YQ, Li JM, Tang HQ, Chen MD, Ni YR, Huang H, Liu CB, Wu JF. Liganded vitamin D receptor through its interacting repressor inhibits the expression of type I collagen $\alpha$ 1. <i>DNA Cell Biol.</i> 2016;35(9):498-505. doi: <a href="https://doi.org/10.1089/dna.2016.3367">10.1089/dna.2016.3367</a>                          | China  |
| 335 | 2016 | Lee SY, Lee J, Lee H, Kim B, Lew J, Baek N, Kim SH. MicroRNA134 mediated upregulation of JNK and downregulation of NF $\kappa$ B signalings are critically involved in dieckol induced antihepatic fibrosis. <i>J Agric Food Chem.</i> 2016;64(27):5508-14. doi: <a href="https://doi.org/10.1021/acs.jafc.6b01945">10.1021/acs.jafc.6b01945</a> | Korea  |
| 336 | 2016 | Li X, Wu XQ, Xu T, Li XF, Yang Y, Li WX, Huang C, Meng XM, Li J. Role of histone deacetylases(HDACs) in progression and reversal of liver fibrosis. <i>Toxicol Appl Pharmacol.</i> 2016;306:58-68. doi: <a href="https://doi.org/10.1016/j.taap.2016.07.003">10.1016/j.taap.2016.07.003</a>                                                      | China  |
| 337 | 2016 | Twu YC, Lee TS, Lin YL, Hsu SM, Wang YH, Liao CY, Wang CK, Liang YC, Liao YJ. Niemann-Pick type C2 protein mediates hepatic stellate cells activation by regulating free cholesterol accumulation. <i>Int J Mol Sci.</i> 2016;17(7):1122. doi: <a href="https://doi.org/10.3390/ijms17071122">10.3390/ijms17071122</a>                           | Taiwan |
| 338 | 2016 | Lee HS, Shin HS, Choi J, Bae SJ, Wee HJ, Son T, Seo JH, Park JH, Kim SW, Kim KW. AMP-activated protein kinase activator, HL156A reduces thioacetamide- induced liver fibrosis in mice and inhibits the activation of cultured hepatic stellate cells and                                                                                         | Korea  |

|     |      |                                                                                                                                                                                                                                                                                                                                                                  |        |
|-----|------|------------------------------------------------------------------------------------------------------------------------------------------------------------------------------------------------------------------------------------------------------------------------------------------------------------------------------------------------------------------|--------|
|     |      | macrophages. <i>Int J Oncol.</i> 2016;49(4):1407-14. doi: <a href="https://doi.org/10.3892/ijo.2016.3627">10.3892/ijo.2016.3627</a>                                                                                                                                                                                                                              |        |
| 339 | 2016 | Chen MF, Huang SJ, Huang CC, Liu PS, Lin KI, Liu CW, Hsieh WC, Shiu LY, Chen CH. Saikosaponin d induces cell death through caspase-3-dependent, caspase-3-independent and mitochondrial pathways in mammalian hepatic stellate cells. <i>BMC Cancer</i> 2016;16:532. doi: <a href="https://doi.org/10.1186/s12885-016-2599-0">10.1186/s12885-016-2599-0</a>      | Taiwan |
| 340 | 2016 | Fan EY, He SQ, Wen B, Sun HT, Jia WY, Chen GX. [Effects of Biejiajian Pill on Proliferation and Apoptosis of Hepatic Stellate Cells in Mice]. <i>Zhongguo Zhong Xi Yi Jie He Za Zhi</i> 2016;36(8):960-6. Chinese. PMID: <a href="https://pubmed.ncbi.nlm.nih.gov/30640992/">30640992</a>                                                                        | China  |
| 341 | 2016 | Liu XY, Liu RX, Hou F, Cui LJ, Li CY, Chi C, Yi E, Wen Y, Yin CH. Fibronectin expression is critical for liver fibrogenesis in vivo and in vitro. <i>Mol Med Rep.</i> 2016;14(4):3669-75. doi: <a href="https://doi.org/10.3892/mmr.2016.5673">10.3892/mmr.2016.5673</a>                                                                                         | China  |
| 342 | 2016 | Liu Y, Yang P, Chen N, Lin S, Liu M. Effects of recombinant human adenovirus-p53 on the regression of hepatic fibrosis. <i>Int J Mol Med.</i> 2016;38(4):1093-100. doi: <a href="https://doi.org/10.3892/ijmm.2016.2716">10.3892/ijmm.2016.2716</a>                                                                                                              | China  |
| 343 | 2016 | Tseng TH, Lin WL, Chen ZH, Lee YJ, Shie MS, Lee KF, Shen CH, Kuo HC. Moniliformediquinone as a potential therapeutic agent, inactivation of hepatic stellate cell and inhibition of liver fibrosis in vivo. <i>J Transl Med.</i> 2016;14(1):263. doi: <a href="https://doi.org/10.1186/s12967-016-1022-6">10.1186/s12967-016-1022-6</a>                          | Taiwan |
| 344 | 2016 | Bai G, Yan G, Wang G, Wan P, Zhang R. Anti-hepatic fibrosis effects of a novel turtle shell decoction by inhibiting hepatic stellate cell proliferation and blocking TGF- $\beta$ 1/Smad signaling pathway in rats. <i>Oncol Rep.</i> 2016;36(5):2902-10. doi: <a href="https://doi.org/10.3892/or.2016.5078">10.3892/or.2016.5078</a>                           | China  |
| 345 | 2016 | He L, Li Z, Zhou D, Ding Y, Xu L, Chen Y, Fan J. Galanin receptor 2 mediates antifibrogenic effects of galanin on hepatic stellate cells. <i>Exp Ther Med.</i> 2016;12(5):3375-80. doi: <a href="https://doi.org/10.3892/etm.2016.3764">10.3892/etm.2016.3764</a>                                                                                                | China  |
| 346 | 2016 | Zhao J, Peng L, Cui R, Guo X, Yan M. Dimethyl $\alpha$ -ketoglutarate reduces CCl4-induced liver fibrosis through inhibition of autophagy in hepatic stellate cells. <i>Biochem Biophys Res Commun.</i> 2016;481(1-2):90-6. doi: <a href="https://doi.org/10.1016/j.bbrc.2016.11.010">10.1016/j.bbrc.2016.11.010</a>                                             | China  |
| 347 | 2016 | Cai SP, Cheng XY, Chen PJ, Pan XY, Xu T, Huang C, Meng XM, Li J. Transmembrane protein 88 attenuates liver fibrosis by promoting apoptosis and reversion of activated hepatic stellate cells. <i>Mol Immunol.</i> 2016;80:58-67. doi: <a href="https://doi.org/10.1016/j.molimm.2016.11.002">10.1016/j.molimm.2016.11.002</a>                                    | China  |
| 348 | 2016 | Bi S, Chu F, Wang M, Li B, Mao P, Zhang H, Wang P, Guo W, Xu L, Ren L, Lei H, Zhang Y. Ligustrazine-oleanolic acid glycine derivative, G-TOA, selectively inhibited the proliferation and induced apoptosis of activated HSC-T6 cells. <i>Molecules</i> 2016;21(11):1599. doi: <a href="https://doi.org/10.3390/molecules21111599">10.3390/molecules21111599</a> | China  |
| 349 | 2016 | Cheng CF, Pan TM. Ankaflavin and Monascin Induce Apoptosis in activated hepatic stellate cells through suppression of the                                                                                                                                                                                                                                        | Taiwan |

|     |      |                                                                                                                                                                                                                                                                                                                                                                |        |
|-----|------|----------------------------------------------------------------------------------------------------------------------------------------------------------------------------------------------------------------------------------------------------------------------------------------------------------------------------------------------------------------|--------|
|     |      | Akt/NF- $\kappa$ B/p38 signaling pathway. J Agric Food Chem. 2016;64(49):9326-34. doi: <a href="https://doi.org/10.1021/acs.jafc.6b03700">10.1021/acs.jafc.6b03700</a>                                                                                                                                                                                         |        |
| 350 | 2017 | Li WX, Chen X, Yang Y, Huang HM, Li HD, Huang C, Meng XM, Li J. Hesperitin derivative-11 suppress hepatic stellate cell activation and proliferation by targeting PTEN/AKT pathway. Toxicology 2017;381:75-86. doi: <a href="https://doi.org/10.1016/j.tox.2016.11.004">10.1016/j.tox.2016.11.004</a>                                                          | China  |
| 351 | 2017 | 351: Wu Y, Bu F, Yu H, Li W, Huang C, Meng X, Zhang L, Ma T, Li J. Methylation of Septin9 mediated by DNMT3a enhances hepatic stellate cells activation and liver fibrogenesis. Toxicol Appl Pharmacol. 2017;315:35-49. doi: <a href="https://doi.org/10.1016/j.taap.2016.12.002">10.1016/j.taap.2016.12.002</a>                                               | China  |
| 352 | 2017 | Chen G, Li J, Yan S, Lin H, Wu J, Zhai X, Song Y, Li J. Biotransformation of 20(R)-panaxatriol by Mucor racemosus and the anti-hepatic fibrosis activity of some products. Nat Prod Res. 2017;31(16):1880-5. doi: <a href="https://doi.org/10.1080/14786419.2016.1263850">10.1080/14786419.2016.1263850</a>                                                    | China  |
| 353 | 2017 | Chen CH, Chen MF, Huang SJ, Huang CY, Wang HK, Hsieh WC, Huang CH, Liu LF, Shiu LY. Saikosaponin A induces apoptosis through mitochondria-dependent pathway in hepatic stellate cells. Am J Chin Med. 2017;45(2):351-68. doi: <a href="https://doi.org/10.1142/S0192415X17500227">10.1142/S0192415X17500227</a>                                                | Taiwan |
| 354 | 2017 | Li B, Cong M, Zhu Y, Xiong Y, Jin W, Wan Y, Zhou Y, Ao Y, Wang H. Indole-3-carbinol induces apoptosis of hepatic stellate cells through K63 de-ubiquitination of RIP1 in rats. Cell Physiol Biochem. 2017;41(4):1481-90. doi: <a href="https://doi.org/10.1159/000470650">10.1159/000470650</a>                                                                | China  |
| 355 | 2017 | Liu J, Li Y, Liu L, Wang Z, Shi C, Cheng Z, Zhang X, Ding F, Chen PS. Double knockdown of PHD1 and Keap1 attenuated hypoxia-induced injuries in hepatocytes. Front Physiol. 2017;8:291. doi: <a href="https://doi.org/10.3389/fphys.2017.00291">10.3389/fphys.2017.00291</a>                                                                                   | China  |
| 356 | 2017 | Chen Q, Zhang H, Cao Y, Li Y, Sun S, Zhang J, Zhang G. Schisandrin B attenuates CCl4-induced liver fibrosis in rats by regulation of Nrf2-ARE and TGF- $\beta$ /Smad signaling pathways. Drug Des Devel Ther. 2017;11:2179-91. doi: <a href="https://doi.org/10.2147/DDDT.S137507">10.2147/DDDT.S137507</a>                                                    | China  |
| 357 | 2017 | Chen Z, Liu H, Jain A, Zhang L, Liu C, Cheng K. Discovery of aptamer ligands for hepatic stellate cells using SELEX. Theranostics 2017;7(12):2982-95. doi: <a href="https://doi.org/10.7150/thno.19374">10.7150/thno.19374</a>                                                                                                                                 | USA    |
| 358 | 2017 | Song LY, Ma YT, Wu CF, Wang CJ, Fang WJ, Liu SK. MicroRNA-195 activates hepatic stellate cells in vitro by targeting Smad7. Biomed Res Int. 2017;2017:1945631. doi: <a href="https://doi.org/10.1155/2017/1945631">10.1155/2017/1945631</a>                                                                                                                    | China  |
| 359 | 2017 | Yin L, Qi Y, Xu Y, Xu L, Han X, Tao X, Song S, Peng J. Dioscin inhibits HSC-T6 cell migration via adjusting SDC-4 expression: Insights from iTRAQ-based quantitative proteomics. Front Pharmacol. 2017;8:665. doi: <a href="https://doi.org/10.3389/fphar.2017.00665">10.3389/fphar.2017.00665</a> . Erratum in: Front Pharmacol. 2019;10:1036. PMID: 29033837 | China  |
| 360 | 2017 | Bai F, Huang Q, Nie J, Lu S, Lu C, Zhu X, Wang Y, Zhuo L, Lu Z, Lin X. Trolline ameliorates liver fibrosis by inhibiting the NF- $\kappa$ B pathway, promoting HSC apoptosis and suppressing autophagy. Cell Physiol Biochem. 2017;44(2):436-46. doi: <a href="https://doi.org/10.1159/000485009">10.1159/000485009</a>                                        | China  |

|     |      |                                                                                                                                                                                                                                                                                                             |        |
|-----|------|-------------------------------------------------------------------------------------------------------------------------------------------------------------------------------------------------------------------------------------------------------------------------------------------------------------|--------|
| 361 | 2017 | Wang YH, Li RK, Fu Y, Li J, Yang XM, Zhang YL, Zhu L, Yang Q, Gu JR, Xing X, Zhang ZG. Exemestane attenuates hepatic fibrosis in rats by inhibiting activation of hepatic stellate cells and promoting the secretion of interleukin 10. J Immunol Res. 2017;2017:3072745. doi: 10.1155/2017/3072745         | China  |
| 362 | 2017 | Zhou D, Wang J, He LN, Li BH, Ding YN, Chen YW, Fan JG. Prolyl oligopeptidase attenuates hepatic stellate cell activation through induction of Smad7 and PPAR- $\gamma$ . Exp Ther Med. 2017;13(2):780-6. doi: 10.3892/etm.2017.4033                                                                        | China  |
| 363 | 2017 | Chang YC, Hwang TL, Kuo LM, Sung PJ. Pinnisterols D-J, New 11-Acetoxy-9,11-secoosterols with a 1,4-Quinone Moiety from Formosan Gorgonian Coral Pinnigorgia sp. (Gorgoniidae). Mar Drugs 2017;15(1):11. doi: 10.3390/md15010011                                                                             | Taiwan |
| 364 | 2017 | Jain A, Barve A, Zhao Z, Jin W, Cheng K. Comparison of Avidin, Neutravidin, and streptavidin as nanocarriers for efficient siRNA delivery. Mol Pharm. 2017;14(5):1517-27. doi: 10.1021/acs.molpharmaceut.6b00933                                                                                            | USA    |
| 365 | 2017 | Chen XJ, Liu WJ, Wen ML, Liang H, Wu SM, Zhu YZ, Zhao JY, Dong XQ, Li MG, Bian L, Zou CG, Ma LQ. Ameliorative effects of Compound K and ginsenoside Rh1 on non-alcoholic fatty liver disease in rats. Sci Rep. 2017;7:41144. doi: 10.1038/srep41144                                                         | China  |
| 366 | 2017 | Lu C, Zou Y, Liu Y, Niu Y. Rosmarinic acid counteracts activation of hepatic stellate cells via inhibiting the ROS-dependent MMP-2 activity: Involvement of Nrf2 antioxidant system. Toxicol Appl Pharmacol. 2017;318:69-78. doi: 10.1016/j.taap.2017.01.008                                                | China  |
| 367 | 2017 | Ni YH, Huo LJ, Li TT. [Effect of interleukin-22 on proliferation and activation of hepatic stellate cells induced by acetaldehyde and related mechanism]. Zhonghua Gan Zang Bing Za Zhi 2017;25(1):9-14. Chinese. doi: 10.3760/cma.j.issn.1007-3418.2017.01.004                                             | China  |
| 368 | 2017 | Hao LS, Liu YL, Zhang GL, Chen J, Song XJ, Wang YL, Wang J, Jin LM. [Effects of wild-type PTEN overexpression and its mutation on F-actin in activated hepatic stellate cells]. Zhonghua Gan Zang Bing Za Zhi 2017;25(1):21-6. Chinese. doi: 10.3760/cma.j.issn.1007-3418.2017.01.006                       | China  |
| 369 | 2017 | Cipriani S, Carino A, Masullo D, Zampella A, Distrutti E, Fiorucci S. Decoding the role of the nuclear receptor SHP in regulating hepatic stellate cells and liver fibrogenesis. Sci Rep. 2017;7:41055. doi: 10.1038/srep41055                                                                              | Italy  |
| 370 | 2017 | Yang N, Dang S, Shi J, Wu F, Li M, Zhang X, Li Y, Jia X, Zhai S. Caffeic acid phenethyl ester attenuates liver fibrosis via inhibition of TGF- $\beta$ 1/Smad3 pathway and induction of autophagy pathway. Biochem Biophys Res Commun. 2017;486(1):22-8. doi: 10.1016/j.bbrc.2017.02.057                    | China  |
| 371 | 2017 | Yang N, Shi JJ, Wu FP, Li M, Zhang X, Li YP, Zhai S, Jia XL, Dang SS. Caffeic acid phenethyl ester up-regulates antioxidant levels in hepatic stellate cell line T6 via an Nrf2-mediated mitogen activated protein kinases pathway. World J Gastroenterol. 2017;23(7):1203-14. doi: 10.3748/wjg.v23.i7.1203 | China  |



|     |      |                                                                                                                                                                                                                                                                                                                                                                                     |       |
|-----|------|-------------------------------------------------------------------------------------------------------------------------------------------------------------------------------------------------------------------------------------------------------------------------------------------------------------------------------------------------------------------------------------|-------|
| 372 | 2017 | Kang KB, Kim HW, Kim JW, Oh WK, Kim J, Sung SH. Catechin-Bound Ceanothane- Type Triterpenoid Derivatives from the Roots of Zizyphus jujuba. J Nat Prod. 2017;80(4):1048-54. doi: <a href="https://doi.org/10.1021/acs.jnatprod.6b01103">10.1021/acs.jnatprod.6b01103</a>                                                                                                            | Korea |
| 373 | 2017 | Kim JY, An HJ, Kim WH, Park YY, Park KD, Park KK. Apamin suppresses biliary fibrosis and activation of hepatic stellate cells. Int J Mol Med. 2017;39(5):1188-94. doi: <a href="https://doi.org/10.3892/ijmm.2017.2922">10.3892/ijmm.2017.2922</a>                                                                                                                                  | Korea |
| 374 | 2017 | Cheng C, Yu S, Kong R, Yuan Q, Ma Y, Yang W, Cao G, Xie L. CTRP3 attenuates hepatic stellate cell activation through transforming growth factor- $\beta$ /Smad signaling pathway. Biomed Pharmacother. 2017;89:1387-91. doi: <a href="https://doi.org/10.1016/j.biopha.2017.03.021">10.1016/j.biopha.2017.03.021</a>                                                                | China |
| 375 | 2017 | Hao LS, Zhang JQ, Liu B, Zhang GL, Chen J, Wang YL, Zhang MT, Zhang PL. [Influence of PTEN down-regulation by in vitro RNA interference on the migration of HSC-T6 cell line]. Zhonghua Gan Zang Bing Za Zhi 2017;25(3):223-5. Chinese. doi: <a href="https://doi.org/10.3760/cma.j.issn.1007-3418.2017.03.012">10.3760/cma.j.issn.1007-3418.2017.03.012</a>                        | China |
| 376 | 2017 | Ni YH, Huo LJ, Li TT. Antioxidant axis Nrf2-keap1-ARE in inhibition of alcoholic liver fibrosis by IL-22. World J Gastroenterol. 2017;23(11):2002-11. doi: <a href="https://doi.org/10.3748/wjg.v23.i11.2002">10.3748/wjg.v23.i11.2002</a>                                                                                                                                          | China |
| 377 | 2017 | Yang Y, Chen XX, Li WX, Wu XQ, Huang C, Xie J, Zhao YX, Meng XM, Li J. EZH2-mediated repression of Dkk1 promotes hepatic stellate cell activation and hepatic fibrosis. J Cell Mol Med. 2017;21(10):2317-28. doi: <a href="https://doi.org/10.1111/jcmm.13153">10.1111/jcmm.13153</a>                                                                                               | China |
| 378 | 2017 | Shi B, Shi J, Qin H. Effect of medicated serum of Curcuma Radix extract on mRNA expression of TIMP-1, MMPs-13 and $\alpha$ 1-collagen of HSC-T6 cell. Saudi Pharm J. 2017;25(4):509-12. doi: <a href="https://doi.org/10.1016/j.jsps.2017.04.015">10.1016/j.jsps.2017.04.015</a>                                                                                                    | China |
| 379 | 2017 | El-Lakkany NM, El-Maadawy WH, Seif El-Din SH, Hammam OA, Mohamed SH, Ezzat SM, Safar MM, Saleh S. Rosmarinic acid attenuates hepatic fibrogenesis via suppression of hepatic stellate cell activation/proliferation and induction of apoptosis. Asian Pac J Trop Med. 2017;10(5):444-53. doi: <a href="https://doi.org/10.1016/j.apjtm.2017.05.012">10.1016/j.apjtm.2017.05.012</a> | Egypt |
| 380 | 2017 | Zhang YQ, Wan LY, He XM, Ni YR, Wang C, Liu CB, Wu JF. Gremlin1 accelerates hepatic stellate cell activation through upregulation of TGF-beta expression. DNA Cell Biol. 2017;36(7):603-10. doi: <a href="https://doi.org/10.1089/dna.2017.3707">10.1089/dna.2017.3707</a>                                                                                                          | China |
| 381 | 2017 | Guo Z, Li D, Peng H, Kang J, Jiang X, Xie X, Sun D, Jiang H. Specific hepatic stellate cell-penetrating peptide targeted delivery of a KLA peptide reduces collagen accumulation by inducing apoptosis. J Drug Target 2017;25(8):715-23. doi: <a href="https://doi.org/10.1080/1061186X.2017.1322598">10.1080/1061186X.2017.1322598</a>                                             | China |
| 382 | 2017 | Liu X, Su J, Shi Y, Guo Y, Suheryani I, Zhao S, Deng Y, Meng W, Chen Y, Sun L, Dai R. Herbal formula, Baogan Yihao (BGYH), prevented dimethylnitrosamine(DMN)-induced liver injury in rats. Drug Dev Res. 2017;78(3-4):155-63. doi: <a href="https://doi.org/10.1002/ddr.21388">10.1002/ddr.21388</a>                                                                               | China |
| 383 | 2017 | Liu H, Chen Z, Jin W, Barve A, Wan YY, Cheng K. Silencing of $\alpha$ -complex protein-2 reverses alcohol- and cytokine-induced                                                                                                                                                                                                                                                     | USA   |

|     |      |                                                                                                                                                                                                                                                                                                                                                                                                            |                |
|-----|------|------------------------------------------------------------------------------------------------------------------------------------------------------------------------------------------------------------------------------------------------------------------------------------------------------------------------------------------------------------------------------------------------------------|----------------|
|     |      | fibrogenesis in hepatic stellate cells. Liver Res. 2017;1(1):70-9. doi: <a href="https://doi.org/10.1016/j.livres.2017.05.003">10.1016/j.livres.2017.05.003</a>                                                                                                                                                                                                                                            |                |
| 384 | 2017 | Hu D, Hu Y, Xu W, Yu H, Yang N, Ni S, Fu R. miR-203 inhibits the expression of collagen-related genes and the proliferation of hepatic stellate cells through a SMAD3-dependent mechanism. Mol Med Rep. 2017;16(2):1248-54. doi: <a href="https://doi.org/10.3892/mmr.2017.6702">10.3892/mmr.2017.6702</a>                                                                                                 | China          |
| 385 | 2017 | Yan S, Wan LY, Ju XJ, Wu JF, Zhang L, Li M, Liu Z, Wang W, Xie R, Chu LY. K <sup>+</sup> -responsive block copolymer micelles for targeted intracellular drug delivery. Macromol Biosci. 2017;17(9). doi: <a href="https://doi.org/10.1002/mabi.201700143">10.1002/mabi.201700143</a>                                                                                                                      | China          |
| 386 | 2017 | Ge S, Xiong Y, Wu X, Xie J, Liu F, He J, Xiang T, Cheng N, Lai L, Zhong Y. Role of growth factor receptor-bound 2 in CCl <sub>4</sub> -induced hepatic fibrosis. Biomed Pharmacother. 2017;92:942-51. doi: <a href="https://doi.org/10.1016/j.biopha.2017.05.142">10.1016/j.biopha.2017.05.142</a>                                                                                                         | China          |
| 387 | 2017 | Liu X, Zhao X. Scoparone attenuates hepatic stellate cell activation through inhibiting TGF- $\beta$ /Smad signaling pathway. Biomed Pharmacother. 2017;93:57-61. doi: <a href="https://doi.org/10.1016/j.biopha.2017.06.006">10.1016/j.biopha.2017.06.006</a>                                                                                                                                             | China          |
| 388 | 2017 | He YJ, Kuchta K, Deng YM, Cameron S, Lin Y, Liu XY, Ye GR, Lv X, Kobayashi Y, Shu JC. Curcumin promotes apoptosis of activated hepatic stellate cells by inhibiting protein expression of the MyD88 pathway. Planta Med. 2017;83(18):1392-6. doi: <a href="https://doi.org/10.1055/s-0043-113044">10.1055/s-0043-113044</a>                                                                                | Japan          |
| 389 | 2017 | Peng L, Jia X, Zhao J, Cui R, Yan M. Substance P promotes hepatic stellate cell proliferation and activation via the TGF- $\beta$ 1/Smad-3 signaling pathway. Toxicol Appl Pharmacol. 2017;329:293-300. doi: <a href="https://doi.org/10.1016/j.taap.2017.06.020">10.1016/j.taap.2017.06.020</a>                                                                                                           | China /<br>USA |
| 390 | 2017 | Zhang J, Song Y, Wang QH, Li L, Ji D, Gu W, Hao M, Lu TL, Mao CQ. [Effects of Curcumae Rhizoma/vinegar-processed Curcumae Rhizoma on immune hepatic fibrosis, proliferation of HSC-T6 and expression of $\alpha$ -SMA and Procollagen I]. Zhongguo Zhong Yao Za Zhi 2017;42(13):2538-45. Chinese. doi: <a href="https://doi.org/10.19540/j.cnki.cjcmm.20170610.001">10.19540/j.cnki.cjcmm.20170610.001</a> | China          |
| 391 | 2017 | Kim JY, An HJ, Kim WH, Gwon MG, Gu H, Park YY, Park KK. Anti-fibrotic effects of synthetic oligodeoxynucleotide for TGF- $\beta$ 1 and Smad in an animal model of liver cirrhosis. Mol Ther Nucleic Acids 2017;8:250-63. doi: <a href="https://doi.org/10.1016/j.omtn.2017.06.022">10.1016/j.omtn.2017.06.022</a>                                                                                          | Korea          |
| 392 | 2017 | Kang KB, Jun JB, Kim JW, Kim HW, Sung SH. Ceanothane- and lupane-type triterpene esters from the roots of Hovenia dulcis and their antiproliferative activity on HSC-T6 cells. Phytochemistry 2017;142:60-7. doi: <a href="https://doi.org/10.1016/j.phytochem.2017.06.014">10.1016/j.phytochem.2017.06.014</a>                                                                                            | Korea          |
| 393 | 2017 | Kao YH, Chen PH, Wu TY, Lin YC, Tsai MS, Lee PH, Tai TS, Chang HR, Sun CK. Lipopolysaccharides induce Smad2 phosphorylation through PI3K/Akt and MAPK cascades in HSC-T6 hepatic stellate cells. Life Sci. 2017;184:37-46. doi: <a href="https://doi.org/10.1016/j.lfs.2017.07.004">10.1016/j.lfs.2017.07.004</a>                                                                                          | Taiwan         |
| 394 | 2017 | Bai GP, Yan GH, Wang GJ, Wan P, Liu XF, Wang H, Zhang RH. Effects of lentiviral vector-mediated shRNA silencing of TGF $\beta$ 1 on the expression of Col1a1 in rat hepatic stellate cells. Mol Med Rep. 2017;16(3):2785-90. doi: <a href="https://doi.org/10.3892/mmr.2017.6945">10.3892/mmr.2017.6945</a>                                                                                                | China          |
| 395 | 2017 | Jiang M, Wu YL, Li X, Zhang Y, Xia KL, Cui BW, Lian LH, Nan JX. Oligomeric proanthocyanidin derived from grape seeds                                                                                                                                                                                                                                                                                       | China          |

|     |      |                                                                                                                                                                                                                                                                                                                                                                                                           |       |
|-----|------|-----------------------------------------------------------------------------------------------------------------------------------------------------------------------------------------------------------------------------------------------------------------------------------------------------------------------------------------------------------------------------------------------------------|-------|
|     |      | inhibited NF- $\kappa$ B signaling in activated HSC: Involvement of JNK/ERK MAPK and PI3K/Akt pathways. Biomed Pharmacother. 2017;93:674-80. doi: <a href="https://doi.org/10.1016/j.biopha.2017.06.105">10.1016/j.biopha.2017.06.105</a>                                                                                                                                                                 |       |
| 396 | 2017 | Chen J, Yu Y, Li S, Liu Y, Zhou S, Cao S, Yin J, Li G. MicroRNA-30a ameliorates hepatic fibrosis by inhibiting Beclin1-mediated autophagy. J Cell Mol Med. 2017;21(12):3679-92. doi: <a href="https://doi.org/10.1111/jcmm.13278">10.1111/jcmm.13278</a>                                                                                                                                                  | China |
| 397 | 2017 | Hu Z, You P, Xiong S, Gao J, Tang Y, Ye X, Xia Y, Zhang D, Liu Y. Carapax Trionycis extracts inhibit fibrogenesis of activated hepatic stellate cells via TGF- $\beta$ 1/Smad and NF $\kappa$ B signaling. Biomed Pharmacother. 2017;95:11-7. doi: <a href="https://doi.org/10.1016/j.biopha.2017.08.011">10.1016/j.biopha.2017.08.011</a>                                                                | China |
| 398 | 2017 | Liu Y, Pan X, Li S, Yu Y, Chen J, Yin J, Li G. Endoplasmic reticulum stress restrains hepatocyte growth factor expression in hepatic stellate cells and rat acute liver failure model. Chem Biol Interact. 2017;277:43-54. doi: <a href="https://doi.org/10.1016/j.cbi.2017.08.015">10.1016/j.cbi.2017.08.015</a>                                                                                         | China |
| 399 | 2017 | Tao LL, Ding D, Yin WH, Peng JY, Hou CJ, Liu XP, Chen YL. TSA increases C/EBP- $\alpha$ expression by increasing its lysine acetylation in hepatic stellate cells. Mol Med Rep. 2017;16(5):6088-93. doi: <a href="https://doi.org/10.3892/mmr.2017.7358">10.3892/mmr.2017.7358</a>                                                                                                                        | China |
| 400 | 2017 | Koppula S, Yum MJ, Kim JS, Shin GM, Chae YJ, Yoon T, Chun CS, Lee JD, Song M. Anti-fibrotic effects of <i>Orostachys japonicus</i> A. Berger (Crassulaceae) on hepatic stellate cells and thioacetamide-induced fibrosis in rats. Nutr Res Pract. 2017;11(6):470-8. doi: <a href="https://doi.org/10.4162/nrp.2017.11.6.470">10.4162/nrp.2017.11.6.470</a>                                                | Korea |
| 401 | 2017 | Yum MJ, Koppula S, Kim JS, Shin GM, Chae YJ, Yoon T, Chun CS, Lee JD, Song M. Protective effects of <i>Ampelopsis brevipedunculata</i> against in vitro hepatic stellate cells system and thioacetamide-induced liver fibrosis rat model. Pharm Biol. 2017;55(1):1577-85. doi: <a href="https://doi.org/10.1080/13880209.2017.1311928">10.1080/13880209.2017.1311928</a>                                  | Korea |
| 402 | 2017 | Kim JS, Koppula S, Yum MJ, Shin GM, Chae YJ, Hong SM, Lee JD, Song M. Anti- fibrotic effects of <i>Cuscuta chinensis</i> with in vitro hepatic stellate cells and a thioacetamide-induced experimental rat model. Pharm Biol. 2017;55(1):1909-19. doi: <a href="https://doi.org/10.1080/13880209.2017.1340965">10.1080/13880209.2017.1340965</a>                                                          | Korea |
| 403 | 2018 | Liu H, Wang X, Han R, Zuo K, Yuan X, Li Y, Zhou J, Yan L, Chu Y. Isolation and molecular cloning of hepatocyte growth factor from guinea pig (gHGF), and expression of truncated variant of gHGF with improved anti-fibrotic activity in <i>Escherichia coli</i> . Int J Biol Macromol. 2018;106:908-16. doi: <a href="https://doi.org/10.1016/j.ijbiomac.2017.08.087">10.1016/j.ijbiomac.2017.08.087</a> | China |
| 404 | 2018 | Zhao Z, Li Y, Jain A, Chen Z, Liu H, Jin W, Cheng K. Development of a peptide-modified siRNA nanocomplex for hepatic stellate cells. Nanomedicine 2018;14(1):51-61. doi: <a href="https://doi.org/10.1016/j.nano.2017.08.017">10.1016/j.nano.2017.08.017</a>                                                                                                                                              | USA   |
| 405 | 2018 | Wu L, Qiu W, Sun J, Wang J. SENP1 attenuates the liver fibrosis through down-regulating the expression of SMAD2. Biochem Biophys Res Commun. 2018;495(1):755-60. doi: <a href="https://doi.org/10.1016/j.bbrc.2017.11.047">10.1016/j.bbrc.2017.11.047</a>                                                                                                                                                 | China |

|     |      |                                                                                                                                                                                                                                                                                                                                                    |             |
|-----|------|----------------------------------------------------------------------------------------------------------------------------------------------------------------------------------------------------------------------------------------------------------------------------------------------------------------------------------------------------|-------------|
| 406 | 2018 | Xu DD, Li XF, Li YH, Liu YH, Huang C, Meng XM, Li J. TIPE2 attenuates liver fibrosis by reversing the activated hepatic stellate cells. <i>Biochem Biophys Res Commun.</i> 2018;498(1):199-206. doi: <a href="https://doi.org/10.1016/j.bbrc.2017.11.178">10.1016/j.bbrc.2017.11.178</a>                                                           | China       |
| 407 | 2018 | Que R, Shen Y, Ren J, Tao Z, Zhu X, Li Y. Estrogen receptor- $\beta$ -dependent effects of saikosaponin-d on the suppression of oxidative stress-induced rat hepatic stellate cell activation. <i>Int J Mol Med.</i> 2018;41(3):1357-64. doi: <a href="https://doi.org/10.3892/ijmm.2017.3349">10.3892/ijmm.2017.3349</a>                          | China       |
| 408 | 2018 | Zhang F, Lu S, He J, Jin H, Wang F, Wu L, Shao J, Chen A, Zheng S. Ligand activation of PPAR $\gamma$ by ligustrazine suppresses pericyte functions of hepatic stellate cells via SMRT-mediated transrepression of HIF-1 $\alpha$ . <i>Theranostics</i> 2018;8(3):610-26. doi: <a href="https://doi.org/10.7150/thno.22237">10.7150/thno.22237</a> | China / USA |
| 409 | 2018 | Cao H, Li S, Xie R, Xu N, Qian Y, Chen H, Hu Q, Quan Y, Yu Z, Liu J, Xiang M. Exploring the mechanism of dangguiliuhuang decoction against hepatic fibrosis by network pharmacology and experimental validation. <i>Front Pharmacol.</i> 2018;9:187. doi: <a href="https://doi.org/10.3389/fphar.2018.00187">10.3389/fphar.2018.00187</a>          | China       |
| 410 | 2018 | Pan XY, Yang Y, Meng HW, Li HD, Chen X, Huang HM, Bu FT, Yu HX, Wang Q, Huang C, Meng XM, Li J. DNA methylation of PTGIS enhances hepatic stellate cells activation and liver fibrogenesis. <i>Front Pharmacol.</i> 2018;9:553. doi: <a href="https://doi.org/10.3389/fphar.2018.00553">10.3389/fphar.2018.00553</a>                               | China       |
| 411 | 2018 | Jiang ZJ, Shen QH, Chen HY, Yang Z, Shuai MQ, Zheng S. Galectin-1 restores immune tolerance to liver transplantation through activation of hepatic stellate cells. <i>Cell Physiol Biochem.</i> 2018;48(3):863-79. doi: <a href="https://doi.org/10.1159/000491955">10.1159/000491955</a>                                                          | China       |
| 412 | 2018 | Zhang XL, Chen ZN, Huang QF, Bai FC, Nie JL, Lu SJ, Wei JB, Lin X. Methyl helicaterate inhibits hepatic stellate cell activation through modulation of apoptosis and autophagy. <i>Cell Physiol Biochem.</i> 2018;51(2):897-908. doi: <a href="https://doi.org/10.1159/000495390">10.1159/000495390</a>                                            | China       |
| 413 | 2018 | Hu YB, Ye XT, Zhou QQ, Fu RQ. Sestrin 2 attenuates rat hepatic stellate cell (HSC) activation and liver fibrosis via an mTOR/AMPK-dependent mechanism. <i>Cell Physiol Biochem.</i> 2018;51(5):2111-22. doi: <a href="https://doi.org/10.1159/000495829">10.1159/000495829</a>                                                                     | China       |
| 414 | 2018 | Xie ZY, Xiao ZH, Wang FF. Inhibition of autophagy reverses alcohol-induced hepatic stellate cells activation through activation of Nrf2-Keap1-ARE signaling pathway. <i>Biochimie</i> 2018;147:55-62. doi: <a href="https://doi.org/10.1016/j.biochi.2017.12.013">10.1016/j.biochi.2017.12.013</a>                                                 | China       |
| 415 | 2018 | Kuo LM, Chen PJ, Sung PJ, Chang YC, Ho CT, Wu YH, Hwang TL. The bioactive extract of Pinnigorgia sp. induces apoptosis of hepatic stellate cells via ROS-ERK/JNK-caspase-3 signaling. <i>Mar Drugs</i> 2018;16(1):19. doi: <a href="https://doi.org/10.3390/md16010019">10.3390/md16010019</a>                                                     | Taiwan      |
| 416 | 2018 | Dong Z, Gao Q, Guo H. Glaucocalyxin A attenuates the activation of hepatic stellate cells through the TGF- $\beta$ 1/Smad signaling pathway. <i>DNA Cell Biol.</i> 2018;37(3):227-32. doi: <a href="https://doi.org/10.1089/dna.2017.3992">10.1089/dna.2017.3992</a>                                                                               | China       |
| 417 | 2018 | Song J, Han X, Yao YL, Li YM, Zhang J, Shao DY, Hou LS, Fan Y, Song SZ, Lian LH, Nan JX, Wu YL. Acanthoic acid suppresses lipin1/2 via TLR4 and IRAK4 signalling pathways in EtOH- and lipopolysaccharide-induced hepatic lipogenesis. <i>J Pharm</i>                                                                                              | China       |

|     |      |                                                                                                                                                                                                                                                                                                                                                                                        |       |
|-----|------|----------------------------------------------------------------------------------------------------------------------------------------------------------------------------------------------------------------------------------------------------------------------------------------------------------------------------------------------------------------------------------------|-------|
|     |      | Pharmacol. 2018;70(3):393-403. doi: <a href="https://doi.org/10.1111/jphp.12877">10.1111/jphp.12877</a>                                                                                                                                                                                                                                                                                |       |
| 418 | 2018 | Wu X, Zhi F, Lun W, Deng Q, Zhang W. Baicalin inhibits PDGF-BB-induced hepatic stellate cell proliferation, apoptosis, invasion, migration and activation via the miR-3595/ACSL4 axis. Int J Mol Med. 2018;41(4):1992-2002. doi: <a href="https://doi.org/10.3892/ijmm.2018.3427">10.3892/ijmm.2018.3427</a>                                                                           | China |
| 419 | 2018 | Chen E, Cen Y, Lu D, Luo W, Jiang H. IL-22 inactivates hepatic stellate cells via downregulation of the TGF- $\beta$ 1/Notch signaling pathway. Mol Med Rep. 2018;17(4):5449-53. doi: <a href="https://doi.org/10.3892/mmr.2018.8516">10.3892/mmr.2018.8516</a>                                                                                                                        | China |
| 420 | 2018 | Zhou F, Wang A, Li D, Wang Y, Lin L. Pinocembrin from <i>Penthorum chinense</i> Pursh suppresses hepatic stellate cells activation through a unified SIRT3-TGF- $\beta$ -Smad signaling pathway. Toxicol Appl Pharmacol. 2018;341:38-50. doi: <a href="https://doi.org/10.1016/j.taap.2018.01.009">10.1016/j.taap.2018.01.009</a>                                                      | China |
| 421 | 2018 | Sun H, Chen G, Wen B, Sun J, An H, Pang J, Xu W, Yang X, He S. Oligo- peptide I-C-F-6 inhibits hepatic stellate cell activation and ameliorates CCl4-induced liver fibrosis by suppressing NF- $\kappa$ B signaling and Wnt/ $\beta$ -catenin signaling. J Pharmacol Sci. 2018;136(3):133-41. doi: <a href="https://doi.org/10.1016/j.jphs.2018.01.003">10.1016/j.jphs.2018.01.003</a> | China |
| 422 | 2018 | Luo H, Zhao F, Zhang F, Liu N. Influence of amygdalin on PDG, IGF and PDGFR expression in HSC-T6 cells. Exp Ther Med. 2018;15(4):3693-8. doi: <a href="https://doi.org/10.3892/etm.2018.5886">10.3892/etm.2018.5886</a>                                                                                                                                                                | China |
| 423 | 2018 | Wang XY, Gao H, Xie XJ, Jurhiin J, Zhang MZ, Zhou YP, Liu R, Ning M, Han J, Tang HF. Triterpenoid Saponins from <i>Anemone rivularis</i> var. <i>Flore-Minore</i> and Their Anti-Proliferative Activity on HSC-T6 Cells. Molecules. 2018;23(2):491. doi: <a href="https://doi.org/10.3390/molecules23020491">10.3390/molecules23020491</a>                                             | China |
| 424 | 2018 | Bu FT, Chen Y, Yu HX, Chen X, Yang Y, Pan XY, Wang Q, Wu YT, Huang C, Meng XM, Li J. SENP2 alleviates CCl4-induced liver fibrosis by promoting activated hepatic stellate cell apoptosis and reversion. Toxicol Lett. 2018;289:86-98. doi: <a href="https://doi.org/10.1016/j.toxlet.2018.03.010">10.1016/j.toxlet.2018.03.010</a>                                                     | China |
| 425 | 2018 | Qin L, Qin J, Zhen X, Yang Q, Huang L. Curcumin protects against hepatic stellate cells activation and migration by inhibiting the CXCL12/CXCR4 biological axis in liver fibrosis : A study in vitro and in vivo. Biomed Pharmacother. 2018;101:599-607. doi: <a href="https://doi.org/10.1016/j.biopha.2018.02.091">10.1016/j.biopha.2018.02.091</a>                                  | China |
| 426 | 2018 | El-Lakkany NM, El-Maadawy WH, Seif El-Din SH, Saleh S, Safar MM, Ezzat SM, Mohamed SH, Botros SS, Demerdash Z, Hammam OA. Antifibrotic effects of gallic acid on hepatic stellate cells: In vitro and in vivo mechanistic study. J Tradit Complement Med. 2018;9(1):45-53. doi: <a href="https://doi.org/10.1016/j.jtcme.2018.01.010">10.1016/j.jtcme.2018.01.010</a>                  | Egypt |
| 427 | 2018 | Zhang Y, Yu X, Wang Z, Yin M, Zhao Z, Li Y, Li W. Pokeweed antiviral protein attenuates liver fibrosis in mice through regulating Wnt/Jnk mediated glucose metabolism. Saudi J Gastroenterol. 2018;24(3):157-64. doi: <a href="https://doi.org/10.4103/sjg.SJG_470_17">10.4103/sjg.SJG_470_17</a>                                                                                      | China |

|     |      |                                                                                                                                                                                                                                                                                                                                                                                                                                     |                |
|-----|------|-------------------------------------------------------------------------------------------------------------------------------------------------------------------------------------------------------------------------------------------------------------------------------------------------------------------------------------------------------------------------------------------------------------------------------------|----------------|
| 428 | 2018 | Gong Z, Tang J, Xiang T, Lin J, Deng C, Peng Y, Zheng J, Hu G. Genome-wide identification of long noncoding RNAs in CCl4-induced liver fibrosis via RNA sequencing. <i>Mol Med Rep.</i> 2018;18(1):299-307. doi: <a href="https://doi.org/10.3892/mmr.2018.8986">10.3892/mmr.2018.8986</a>                                                                                                                                          | China          |
| 429 | 2018 | Wei X, Chen Y, Huang W. Ginsenoside Rg1 ameliorates liver fibrosis via suppressing epithelial to mesenchymal transition and reactive oxygen species production in vitro and in vivo. <i>Biofactors</i> 2018;44(4):327-35. doi: <a href="https://doi.org/10.1002/biof.1432">10.1002/biof.1432</a>                                                                                                                                    | China          |
| 430 | 2018 | Chung YH, Huang YH, Chu TH, Chen CL, Lin PR, Huang SC, Wu DC, Huang CC, Hu TH, Kao YH, Tai MH. BMP-2 restoration aids in recovery from liver fibrosis by attenuating TGF- $\beta$ 1 signaling. <i>Lab Invest.</i> 2018;98(8):999-1013. doi: <a href="https://doi.org/10.1038/s41374-018-0069-9">10.1038/s41374-018-0069-9</a>                                                                                                       | Taiwan         |
| 431 | 2018 | Cummins CB, Wang X, Nunez Lopez O, Graham G, Tie HY, Zhou J, Radhakrishnan RS. Luteolin-mediated inhibition of hepatic stellate cell activation via suppression of the STAT3 pathway. <i>Int J Mol Sci.</i> 2018;19(6):1567. doi: <a href="https://doi.org/10.3390/ijms19061567">10.3390/ijms19061567</a>                                                                                                                           | China /<br>USA |
| 432 | 2018 | Ma X, Luo Q, Zhu H, Liu X, Dong Z, Zhang K, Zou Y, Wu J, Ge J, Sun A. Aldehyde dehydrogenase 2 activation ameliorates CCl4-induced chronic liver fibrosis in mice by up-regulating Nrf2/HO-1 antioxidant pathway. <i>J Cell Mol Med.</i> 2018;22(8):3965-78. doi: <a href="https://doi.org/10.1111/jcmm.13677">10.1111/jcmm.13677</a>                                                                                               | China          |
| 433 | 2018 | Cummins CB, Wang X, Xu J, Hughes BD, Ding Y, Chen H, Zhou J, Radhakrishnan RS. Antifibrosis effect of novel oridonin analog CYD0618 via suppression of the NF- $\kappa$ B pathway. <i>J Surg Res.</i> 2018;232:283-92. doi: <a href="https://doi.org/10.1016/j.jss.2018.06.040">10.1016/j.jss.2018.06.040</a>                                                                                                                       | USA            |
| 434 | 2018 | Qin GJ, Zhao YZ, Liu YX, Li C, Cao J, Cheng QC, Xiao XH, Lu Q. [Study on the effects of total flavonoids from litchi nucleus on nuclear translocation of nuclear factor-kappa B and related protein expression in rat hepatic stellate cell]. <i>Zhonghua Gan Zang Bing Za Zhi.</i> 2018;26(7):535-9. Chinese. doi: <a href="https://doi.org/10.3760/cma.j.issn.1007-3418.2018.07.011">10.3760/cma.j.issn.1007-3418.2018.07.011</a> | China          |
| 435 | 2018 | Cai X, Li Z, Zhang Q, Qu Y, Xu M, Wan X, Lu L. CXCL6-EGFR-induced Kupffer cells secrete TGF- $\beta$ 1 promoting hepatic stellate cell activation via the SMAD2/BRD4/C-MYC/EZH2 pathway in liver fibrosis. <i>J Cell Mol Med.</i> 2018;22(10):5050-61. doi: <a href="https://doi.org/10.1111/jcmm.13787">10.1111/jcmm.13787</a>                                                                                                     | China          |
| 436 | 2018 | Wang X, Niu C, Zhang X, Dong M. Emodin suppresses activation of hepatic stellate cells through p38 mitogen-activated protein kinase and Smad signaling pathways in vitro. <i>Phytother Res.</i> 2018;32(12):2436-6. doi: <a href="https://doi.org/10.1002/ptr.6182">10.1002/ptr.6182</a>                                                                                                                                            | China          |
| 437 | 2018 | Hu Y, Hu D, Yu H, Xu W, Fu R. Hypoxia-inducible factor 1 $\alpha$ and ROCK1 regulate proliferation and collagen synthesis in hepatic stellate cells under hypoxia. <i>Mol Med Rep.</i> 2018;18(4):3997-4003. doi: <a href="https://doi.org/10.3892/mmr.2018.9397">10.3892/mmr.2018.9397</a>                                                                                                                                         | China          |
| 438 | 2018 | Li Y, Zhu M, Huo Y, Zhang X, Liao M. Anti-fibrosis activity of combination therapy with epigallocatechin gallate, taurine and genistein by regulating glycolysis, gluconeogenesis, and ribosomal and lysosomal signaling pathways in HSC-T6 cells. <i>Exp Ther Med.</i> 2018;16(6):4329-38. doi: <a href="https://doi.org/10.3892/etm.2018.6743">10.3892/etm.2018.6743</a>                                                          | China          |



|     |      |                                                                                                                                                                                                                                                                                                                                                                                                                    |                    |
|-----|------|--------------------------------------------------------------------------------------------------------------------------------------------------------------------------------------------------------------------------------------------------------------------------------------------------------------------------------------------------------------------------------------------------------------------|--------------------|
| 439 | 2018 | Shi Y, Wu YF, Long CZ, He P, Gu JY, Yang L, Wang YP. [Study of antioxidant effect of cannabinoid receptor type 2 agonist on rat hepatic stellate cell line]. <i>Zhonghua Gan Zang Bing Za Zhi</i> 2018;26(9):660-5. Chinese. doi: <a href="https://doi.org/10.3760/cma.j.issn.1007-3418.2018.09.005">10.3760/cma.j.issn.1007-3418.2018.09.005</a>                                                                  | China              |
| 440 | 2018 | Chen X, Li WX, Chen Y, Li XF, Li HD, Huang HM, Bu FT, Pan XY, Yang Y, Huang C, Meng XM, Li J. Suppression of SUN2 by DNA methylation is associated with HSCs activation and hepatic fibrosis. <i>Cell Death Dis.</i> 2018;9(10):1021. doi: <a href="https://doi.org/10.1038/s41419-018-1032-9">10.1038/s41419-018-1032-9</a>                                                                                       | China              |
| 441 | 2018 | Yu Q, Xiong XQ, Zhao L, Xu TT, Bi H, Fu R, Wang QH. Biodistribution and toxicity assessment of superparamagnetic iron oxide nanoparticles in vitro and in vivo. <i>Curr Med Sci.</i> 2018;38(6):1096-102. doi: <a href="https://doi.org/10.1007/s11596-018-1989-8">10.1007/s11596-018-1989-8</a>                                                                                                                   | China              |
| 442 | 2018 | Shin GM, Koppula S, Chae YJ, Kim HS, Lee JD, Kim MK, Song M. Anti- hepatofibrosis effect of <i>Allium senescens</i> in activated hepatic stellate cells and thioacetamide-induced fibrosis rat model. <i>Pharm Biol.</i> 2018;56(1):632-42. doi: <a href="https://doi.org/10.1080/13880209.2018.1529801">10.1080/13880209.2018.1529801</a>                                                                         | Korea              |
| 443 | 2019 | Zhang M, Zhao X, Geng J, Liu H, Zeng F, Qin Y, Li J, Liu C, Wang H. Efficient penetration of Scp01-b and its DNA transfer abilities into cells. <i>J Cell Physiol.</i> 2019;234(5):6539-47. doi: <a href="https://doi.org/10.1002/jcp.27392">10.1002/jcp.27392</a>                                                                                                                                                 | China /<br>USA     |
| 444 | 2019 | Wang Y, Sun Y, Zuo L, Wang Y, Huang Y. ASIC1a promotes high glucose and PDGF-induced hepatic stellate cell activation by inducing autophagy through CaMKK $\beta$ /ERK signaling pathway. <i>Toxicol Lett.</i> 2019;300:1-9. doi: <a href="https://doi.org/10.1016/j.toxlet.2018.10.003">10.1016/j.toxlet.2018.10.003</a>                                                                                          | China              |
| 445 | 2019 | Fan Y, Du Z, Steib CJ, Ding Q, Lu P, Tian D, Liu M. Effect of SEPT6 on the biological behavior of hepatic stellate cells and liver fibrosis in rats and its mechanism. <i>Lab Invest.</i> 2019;99(1):17-36. doi: <a href="https://doi.org/10.1038/s41374-018-0133-5">10.1038/s41374-018-0133-5</a>                                                                                                                 | China /<br>Germany |
| 446 | 2019 | Lin IY, Chiou YS, Wu LC, Tsai CY, Chen CT, Chuang WC, Lee MC, Lin CC, Lin TT, Chen SC, Pan MH, Ma N. CCM111 prevents hepatic fibrosis via cooperative inhibition of TGF- $\beta$ , Wnt and STAT3 signaling pathways. <i>J Food Drug Anal.</i> 2019;27(1):184-94. doi: <a href="https://doi.org/10.1016/j.jfda.2018.09.008">10.1016/j.jfda.2018.09.008</a>                                                          | Taiwan             |
| 447 | 2019 | Huang Q, Zhang X, Bai F, Nie J, Wen S, Wei Y, Wei J, Huang R, He M, Lu Z, Lin X. Methyl helicerte ameliorates liver fibrosis by regulating miR-21-mediated ERK and TGF- $\beta$ 1/Smads pathways. <i>Int Immunopharmacol.</i> 2019;66:41-51. doi: <a href="https://doi.org/10.1016/j.intimp.2018.11.006">10.1016/j.intimp.2018.11.006</a> . Erratum in: <i>Int Immunopharmacol.</i> 2020;79:106117. PMID: 30419452 | China /<br>USA     |
| 448 | 2019 | Ullah A, Wang K, Wu P, Oupicky D, Sun M. CXCR4-targeted liposomal mediated co-delivery of pirfenidone and AMD3100 for the treatment of TGF $\beta$ -induced HSC-T6 cells activation. <i>Int J Nanomedicine</i> 2019;14:2927-44. doi: <a href="https://doi.org/10.2147/IJN.S171280">10.2147/IJN.S171280</a>                                                                                                         | China /<br>USA     |
| 449 | 2019 | Huang C, Gan D, Luo F, Wan S, Chen J, Wang A, Li B, Zhu X. Interaction mechanisms between the NOX4/ROS and RhoA/ROCK1 signaling pathways as new anti-fibrosis targets of ursolic acid in hepatic stellate cells. <i>Front Pharmacol.</i> 2019;10:431. doi: <a href="https://doi.org/10.3389/fphar.2019.00431">10.3389/fphar.2019.00431</a>                                                                         | China              |

|     |      |                                                                                                                                                                                                                                                                                                                                                                                                                                      |       |
|-----|------|--------------------------------------------------------------------------------------------------------------------------------------------------------------------------------------------------------------------------------------------------------------------------------------------------------------------------------------------------------------------------------------------------------------------------------------|-------|
| 450 | 2019 | Chen Y, Zhou G, Ma B, Tong J, Wang Y. Active constituent in the ethyl acetate extract fraction of Terminalia bellirica fruit exhibits antioxidation, antifibrosis, and proapoptosis capabilities in vitro. Oxid Med Cell Longev. 2019;2019:5176090. doi: <a href="https://doi.org/10.1155/2019/5176090">10.1155/2019/5176090</a>                                                                                                     | China |
| 451 | 2019 | Li Y, Zhang T, Liu Q, Zhang J, Li R, Pu S, Wu T, Ma L, He J. Mixed micelles loaded with the 5-benzylidenethiazolidine-2,4-dione derivative SKLB023 for efficient treatment of non-alcoholic steatohepatitis. Int J Nanomedicine 2019;14:3943-53. doi: <a href="https://doi.org/10.2147/IJN.S202821">10.2147/IJN.S202821</a>                                                                                                          | China |
| 452 | 2019 | Pan XY, You HM, Wang L, Bi YH, Yang Y, Meng HW, Meng XM, Ma TT, Huang C, Li J. Methylation of RCAN1.4 mediated by DNMT1 and DNMT3b enhances hepatic stellate cell activation and liver fibrogenesis through Calcineurin/NFAT3 signaling. Theranostics 2019;9(15):4308-23. doi: <a href="https://doi.org/10.7150/thno.32710">10.7150/thno.32710</a>                                                                                   | China |
| 453 | 2019 | Yin L, Qi Y, Xu Y, Xu L, Han X, Tao X, Song S, Peng J. Corrigendum: Dioscin inhibits HSC-T6 cell migration via adjusting SDC-4 expression: Insights from iTRAQ-based quantitative proteomics. Front Pharmacol. 2019;10:1036. doi: <a href="https://doi.org/10.3389/fphar.2019.01036">10.3389/fphar.2019.01036</a> . Erratum for: Front Pharmacol. 2017;8:665. PMID: <a href="https://pubmed.ncbi.nlm.nih.gov/31579122/">31579122</a> | China |
| 454 | 2019 | Kumar V, Dong Y, Kumar V, Almawash S, Mahato RI. The use of micelles to deliver potential hedgehog pathway inhibitor for the treatment of liver fibrosis. Theranostics 2019;9(25):7537-55. doi: <a href="https://doi.org/10.7150/thno.38913">10.7150/thno.38913</a>                                                                                                                                                                  | USA   |
| 455 | 2019 | Tan YF, Tang L, OuYang WX, Jiang T, Zhang H, Li SJ. $\beta$ -catenin-coordinated lncRNA MALAT1 up-regulation of ZEB-1 could enhance the telomerase activity in HGF-mediated differentiation of bone marrow mesenchymal stem cells into hepatocytes. Pathol Res Pract. 2019;215(3):546-54. doi: <a href="https://doi.org/10.1016/j.prp.2019.01.002">10.1016/j.prp.2019.01.002</a>                                                     | China |
| 456 | 2019 | Yu HX, Yao Y, Bu FT, Chen Y, Wu YT, Yang Y, Chen X, Zhu Y, Wang Q, Pan XY, Meng XM, Huang C, Li J. Blockade of YAP alleviates hepatic fibrosis through accelerating apoptosis and reversion of activated hepatic stellate cells. Mol Immunol. 2019;107:29-40. doi: <a href="https://doi.org/10.1016/j.molimm.2019.01.004">10.1016/j.molimm.2019.01.004</a>                                                                           | China |
| 457 | 2019 | Liu Q, Sun F, Deng Y, Dai R, Lv F. HPLC-ESI-MSn identification and NMR characterization of glucosyloxybenzyl 2R-benzylmalate deriva- Tives from Arundina Graminifolia and their anti-liver fibrotic effects in vitro. Molecules 2019;24(3):525. doi: <a href="https://doi.org/10.3390/molecules24030525">10.3390/molecules24030525</a>                                                                                               | China |
| 458 | 2019 | Zuo JJ, Shen CY, Shen BD, Liu Y, Zhong RN, Liu X, Wang XH, Yuan HL. [Preparation and in vitro anti-hepatic fibrosis evaluation of herpetone nanosuspensions]. Zhongguo Zhong Yao Za Zhi 2019;44(6):1164-9. Chinese. doi: <a href="https://doi.org/10.19540/j.cnki.cjcmm.20181224.001">10.19540/j.cnki.cjcmm.20181224.001</a>                                                                                                         | China |
| 459 | 2019 | Zhang X, Zhou J, Zhu Y, He L, Pang Z, Wang Z, Xu C, Zhang C, Hao Q, Li W, Zhang W, Zhang Y, Li M. d-amino acid modification protects N-acetyl-seryl- aspartyl-lysyl-proline from physiological hydroxylation and increases its antifibrotic                                                                                                                                                                                          | China |

|     |      |                                                                                                                                                                                                                                                                                                                                          |             |
|-----|------|------------------------------------------------------------------------------------------------------------------------------------------------------------------------------------------------------------------------------------------------------------------------------------------------------------------------------------------|-------------|
|     |      | effects on hepatic fibrosis. IUBMB Life 2019;71(9):1302-12. doi: <a href="https://doi.org/10.1002/iub.2037">10.1002/iub.2037</a>                                                                                                                                                                                                         |             |
| 460 | 2019 | Wang YZ, Zhang W, Wang YH, Fu XL, Xue CQ. Repression of liver cirrhosis achieved by inhibitory effect of miR-454 on hepatic stellate cells activation and proliferation via Wnt10a. J Biochem. 2019;165(4):361-7. doi: <a href="https://doi.org/10.1093/jb/mvy111">10.1093/jb/mvy111</a>                                                 | China       |
| 461 | 2019 | Lin X, Li J, Xing YQ. Geniposide, a sonic hedgehog signaling inhibitor, inhibits the activation of hepatic stellate cell. Int Immunopharmacol. 2019;72:330-8. doi: <a href="https://doi.org/10.1016/j.intimp.2019.04.016">10.1016/j.intimp.2019.04.016</a>                                                                               | China       |
| 462 | 2019 | Wei Y, Zhang X, Wen S, Huang S, Huang Q, Lu S, Bai F, Nie J, Wei J, Lu Z, Lin X. Methyl helicaterate inhibits hepatic stellate cell activation through downregulating the ERK1/2 signaling pathway. J Cell Biochem. 2019;120(9):14936-45. doi: <a href="https://doi.org/10.1002/jcb.28756">10.1002/jcb.28756</a>                         | China / USA |
| 463 | 2019 | Han J, Zhang X, Lau JK, Fu K, Lau HC, Xu W, Chu ES, Lan H, Yu J. Bone marrow-derived macrophage contributes to fibrosing steatohepatitis through activating hepatic stellate cells. J Pathol. 2019;248(4):488-500. doi: <a href="https://doi.org/10.1002/path.5275">10.1002/path.5275</a>                                                | China       |
| 464 | 2019 | Hsu WH, Liao SC, Chyan YJ, Huang KW, Hsu SL, Chen YC, Siu ML, Chang CC, Chung YS, Huang CF. Graptopetalum paraguayense inhibits liver fibrosis by blocking TGF- $\beta$ signaling in vivo and in vitro. Int J Mol Sci. 2019;20(10):2592. doi: <a href="https://doi.org/10.3390/ijms20102592">10.3390/ijms20102592</a>                    | Taiwan      |
| 465 | 2019 | Liu X, Zhang M, Zhang H, Zhao A, Sun J, Tang W. [Role of PPAR- $\gamma$ -regulated autophagy in genistein-induced inhibition of hepatic stellate cell activation]. Nan Fang Yi Ke Da Xue Xue Bao 2019;39(5):561-5. Chinese. doi: <a href="https://doi.org/10.12122/j.issn.1673-4254.2019.05.10">10.12122/j.issn.1673-4254.2019.05.10</a> | China       |
| 466 | 2019 | Moon MY, Kim HJ, Kim MJ, Uhm S, Park JW, Suk KT, Park JB, Kim DJ, Kim SE. Rap1 regulates hepatic stellate cell migration through the modulation of RhoA activity in response to TGF- $\beta$ 1. Int J Mol Med. 2019;44(2):491-502. doi: <a href="https://doi.org/10.3892/ijmm.2019.4215">10.3892/ijmm.2019.4215</a>                      | Korea       |
| 467 | 2019 | Wu SM, Li TH, Yun H, Ai HW, Zhang KH. miR-140-3p knockdown suppresses cell proliferation and fibrogenesis in hepatic stellate cells via PTEN-mediated AKT/mTOR signaling. Yonsei Med J. 2019;60(6):561-9. doi: <a href="https://doi.org/10.3349/ymj.2019.60.6.561">10.3349/ymj.2019.60.6.561</a>                                         | China       |
| 468 | 2019 | Song LY, Ma YT, Fang WJ, He Y, Wu JL, Zuo SR, Deng ZZ, Wang SF, Liu SK. Inhibitory effects of oxymatrine on hepatic stellate cells activation through TGF- $\beta$ /miR-195/Smad signaling pathway. BMC Complement Altern Med. 2019;19(1):138. doi: <a href="https://doi.org/10.1186/s12906-019-2560-2">10.1186/s12906-019-2560-2</a>    | China       |
| 469 | 2019 | Cao G, Zhu R, Jiang T, Tang D, Kwan HY, Su T. Danshensu, a novel indoleamine 2,3-dioxygenase1 inhibitor, exerts anti-hepatic fibrosis effects via inhibition of JAK2-STAT3 signaling. Phytomedicine 2019;63:153055. doi: <a href="https://doi.org/10.1016/j.phymed.2019.153055">10.1016/j.phymed.2019.153055</a>                         | China       |
| 470 | 2019 | Du XS, Li HD, Yang XJ, Li JJ, Xu JJ, Chen Y, Xu QQ, Yang L, He CS, Huang C, Meng XM, Li J. Wogonin attenuates liver fibrosis via regulating hepatic stellate cell activation and apoptosis. Int Immunopharmacol. 2019;75:105671. doi: <a href="https://doi.org/10.1016/j.intimp.2019.105671">10.1016/j.intimp.2019.105671</a>            | China       |

|     |      |                                                                                                                                                                                                                                                                                                                                                                                                                                                              |       |
|-----|------|--------------------------------------------------------------------------------------------------------------------------------------------------------------------------------------------------------------------------------------------------------------------------------------------------------------------------------------------------------------------------------------------------------------------------------------------------------------|-------|
|     |      | <a href="https://doi.org/10.1016/j.intimp.2019.05.056">10.1016/j.intimp.2019.05.056</a>                                                                                                                                                                                                                                                                                                                                                                      |       |
| 471 | 2019 | Wang Y, Yan D. Plantamajoside exerts antifibrosis effects in the liver by inhibiting hepatic stellate cell activation. <i>Exp Ther Med.</i> 2019;18(4):2421-8. doi: <a href="https://doi.org/10.3892/etm.2019.7843">10.3892/etm.2019.7843</a>                                                                                                                                                                                                                | China |
| 472 | 2019 | Ganbold M, Shimamoto Y, Ferdousi F, Tominaga K, Isoda H. Antifibrotic effect of methylated quercetin derivatives on TGFβ-induced hepatic stellate cells. <i>Biochem Biophys Rep.</i> 2019;20:100678. doi: <a href="https://doi.org/10.1016/j.bbrep.2019.100678">10.1016/j.bbrep.2019.100678</a>                                                                                                                                                              | Japan |
| 473 | 2019 | Ji H, Ji H, Wang B. [Aldosterone promotes migration of rat hepatic stellate cells via activation of RhoA/ROCK signaling pathway]. <i>Xi Bao Yu Fen Zi Mian Yi Xue Za Zhi</i> 2019;35(9):812-6. Chinese. PMID: <a href="https://pubmed.ncbi.nlm.nih.gov/31750823/">31750823</a>                                                                                                                                                                               | China |
| 474 | 2019 | Chen Z, Yao L, Liu Y, Pan Z, Peng S, Wan G, Cheng J, Wang J, Cao W. Astragaloside IV regulates NF-κB-mediated cellular senescence and apoptosis of hepatic stellate cells to suppress PDGF-BB-induced activation. <i>Exp Ther Med.</i> 2019;18(5):3741-50. doi: <a href="https://doi.org/10.3892/etm.2019.8047">10.3892/etm.2019.8047</a>                                                                                                                    | China |
| 475 | 2019 | He H, Dai J, Feng J, He Q, Chen X, Dai W, Xu A, Huang H. FBXO31 modulates activation of hepatic stellate cells and liver fibrogenesis by promoting ubiquitination of Smad7. <i>J Cell Biochem.</i> 2019;121(8-9):3711-9. doi: <a href="https://doi.org/10.1002/jcb.29528">10.1002/jcb.29528</a>                                                                                                                                                              | China |
| 476 | 2019 | Choi JH, Kim SM, Lee GH, Jin SW, Lee HS, Chung YC, Jeong HG. Platycodin A, Platycodi Radix-derived saponin, suppresses TGF-1-induced activation of hepatic stellate cells via blocking SMAD and activating the PPAR signaling pathway. <i>Cells</i> 2019;8(12):1544. doi: <a href="https://doi.org/10.3390/cells8121544">10.3390/cells8121544</a>                                                                                                            | Korea |
| 477 | 2019 | Zhang T, Hao H, Zhou ZQ, Zeng T, Zhang JM, Zhou XY. Lipoxin A4 inhibited the activation of hepatic stellate cells -T6 cells by modulating profibrotic cytokines and NF-κB signaling pathway. <i>Prostaglandins Other Lipid Mediat.</i> 2020;146:106380. doi: <a href="https://doi.org/10.1016/j.prostaglandins.2019.106380">10.1016/j.prostaglandins.2019.106380</a>                                                                                         | China |
| 478 | 2019 | Tao Y, Qiu T, Yao X, Jiang L, Wang N, Jia X, Wei S, Wang Z, Pei P, Zhang J, Zhu Y, Yang G, Liu X, Liu S, Sun X. Autophagic-CTSB-inflammasome axis modulates hepatic stellate cells activation in arsenic-induced liver fibrosis. <i>Chemosphere</i> 2020;242:124959. doi: <a href="https://doi.org/10.1016/j.chemosphere.2019.124959">10.1016/j.chemosphere.2019.124959</a>                                                                                  | China |
| 479 | 2019 | Huang D, Dong Z, Sun L, Chen W, Sun L. Two neolignans from <i>Penthorum chinense</i> and their antiproliferative activities. <i>Nat Prod Res.</i> 2020;34(11):1515-20. doi: <a href="https://doi.org/10.1080/14786419.2018.1517261">10.1080/14786419.2018.1517261</a>                                                                                                                                                                                        | China |
| 480 | 2019 | Hao LS, Zhang PL, Liu B, Zhang GL, Chen J, Song J, Zhang MT, Jin LM. [Effect of downregulation of phosphatase and tensin homolog gene expression on p130crk-related substrate protein and paxillin signal transduction in activated hepatic stellate cells in vitro]. <i>Zhonghua Gan Zang Bing Za Zhi</i> 2019;27(12):989-93. Chinese. doi: <a href="https://doi.org/10.3760/cma.j.issn.1007-3418.2019.12.011">10.3760/cma.j.issn.1007-3418.2019.12.011</a> | China |
| 481 | 2020 | Rao C, Ni YR, Zhao YM, Zhang YQ, Zhou RT, Liu CB, Han L, Wu JF. Class C1 decoy oligodeoxynucleotide inhibits profibrotic                                                                                                                                                                                                                                                                                                                                     | China |

|     |      |                                                                                                                                                                                                                                                                                                                |        |
|-----|------|----------------------------------------------------------------------------------------------------------------------------------------------------------------------------------------------------------------------------------------------------------------------------------------------------------------|--------|
|     |      | genes expression in rat hepatic stellate cells. Mol Med Rep. 2020;21(2):667-74. doi: 10.3892/mmr.2019.10881                                                                                                                                                                                                    |        |
| 482 | 2020 | Zhu H, Shan Y, Ge K, Lu J, Kong W, Jia C. Specific overexpression of mitofusin-2 in hepatic stellate cells ameliorates liver fibrosis in mice model. Hum Gene Ther. 2020;31(1-2):103-9. doi: 10.1089/hum.2019.153                                                                                              | China  |
| 483 | 2020 | Yu L, Wang L, Yi H, Wu X. LRP6-CRISPR prevents activation of hepatic stellate cells and liver fibrogenesis in rats. Am J Transl Res. 2020;12(2):397-408. PMID: 32194892                                                                                                                                        | China  |
| 484 | 2020 | Du J, Ren W, Zhang Q, Fu N, Han F, Cui P, Li W, Kong L, Zhao S, Wang R, Zhang Y, Yang L, Kong L, Nan Y. Heme oxygenase-1 suppresses Wnt signaling pathway in nonalcoholic steatohepatitis-related liver fibrosis. Biomed Res Int. 2020;2020:4910601. doi: 10.1155/2020/4910601                                 | China  |
| 485 | 2020 | Wu JS, Chiu V, Lan CC, Wang MC, Tzeng IS, Kuo CY, Hsieh PC. Chrysophanol prevents lipopolysaccharide-induced hepatic stellate cell activation by upregulating apoptosis, oxidative stress, and the unfolded protein response. Evid Based Complement Alternat Med. 2020;2020:8426051. doi: 10.1155/2020/8426051 | Taiwan |
| 486 | 2020 | Chen G, Zhu Y, Liang X, Wang X, Yu W, Guo J, Zhu L, Ma R. The effect of lecithins coupled decorin nanoliposomes on treatment of carbon tetrachloride-induced liver fibrosis. Biomed Res Int. 2020;2020:8815904. doi: 10.1155/2020/8815904                                                                      | China  |
| 487 | 2020 | Chang Y, Xia L, Song M, Tang M, Patpur BK, Li J, Yang W, Yang C. The in vitro effects of phospholipase D1-mTOR axis in liver fibrogenesis. Life Sci. 2020;251:117595. doi: 10.1016/j.lfs.2020.117595                                                                                                           | China  |
| 488 | 2020 | Zhang Q, Mohammed EAH, Wang Y, Bai Z, Zhao Q, He D, Wang Z. Synthesis and anti-hepaticfibrosis of glycyrrhetic acid derivatives with inhibiting COX-2. Bioorg Chem. 2020;99:103804. doi: 10.1016/j.bioorg.2020.103804                                                                                          | China  |
| 489 | 2020 | Yin L, Zhang Y, Shi H, Feng Y, Zhang Z, Zhang L. Proteomic profiling of hepatic stellate cells in alcohol liver fibrosis reveals proteins involved in collagen production. Alcohol 2020;86:81-91. doi: 10.1016/j.alcohol.2020.02.167                                                                           | China  |
| 490 | 2020 | Liang H, Wang X, Si C, Duan Y, Chen B, Liang H, Yang D. Downregulation of miR-141 deactivates hepatic stellate cells by targeting the PTEN/AKT/mTOR pathway. Int J Mol Med. 2020;46(1):406-14. doi: 10.3892/ijmm.2020.4578                                                                                     | China  |
| 491 | 2020 | Hu Z, Su H, Zeng Y, Lin C, Guo Z, Zhong F, Jiang K, Yuan G, He S. Tetramethylpyrazine ameliorates hepatic fibrosis through autophagy-mediated inflammation. Biochem Cell Biol. 2020;98(3):327-37. doi: 10.1139/bcb-2019-0059                                                                                   | China  |
| 492 | 2020 | Dong Z, Li S, Si L, Ma R, Bao L, Bo A. Identification lncRNA LOC102551149/miR-23a-5p pathway in hepatic fibrosis. Eur J Clin Invest. 2020;50(6):e13243. doi: 10.1111/eci.13243                                                                                                                                 | China  |
| 493 | 2020 | Yang H, Zhao LF, Zhang L, Zhang XH, Zhang XQ. [Rosiglitazone inhibits hepatic stellate cell proliferation by regulating peroxisome proliferator- activated receptor gamma/ heme oxygenase-1 expression]. Zhonghua Gan Zang Bing Za Zhi                                                                         | China  |

|     |      |                                                                                                                                                                                                                                                                                                                                                                                                                                                     |        |
|-----|------|-----------------------------------------------------------------------------------------------------------------------------------------------------------------------------------------------------------------------------------------------------------------------------------------------------------------------------------------------------------------------------------------------------------------------------------------------------|--------|
|     |      | 2020;28(5):410-5. Chinese. doi: <a href="https://doi.org/10.3760/cma.j.cn501113-20190430-00150">10.3760/cma.j.cn501113-20190430-00150</a>                                                                                                                                                                                                                                                                                                           |        |
| 494 | 2020 | Asada K, Kaji K, Sato S, Seki K, Shimozaoto N, Kawaratani H, Takaya H, Sawada Y, Nakanishi K, Furukawa M, Kitade M, Moriya K, Namisaki T, Noguchi R, Akahane T, Yoshiji H. Hydralazine sensitizes to the antifibrotic effect of 5-aza-2'-deoxycytidine in hepatic stellate cells. <i>Biology (Basel)</i> 2020;9(6):117. doi: <a href="https://doi.org/10.3390/biology9060117">10.3390/biology9060117</a>                                            | Japan  |
| 495 | 2020 | Du QH, Zhang CJ, Li WH, Mu Y, Xu Y, Lowe S, Han L, Yu X, Wang SY, Li Y, Li J. Gan Shen Fu Fang ameliorates liver fibrosis in vitro and in vivo by inhibiting the inflammatory response and extracellular signal- regulated kinase phosphorylation. <i>World J Gastroenterol.</i> 2020;26(21):2810-20. doi: <a href="https://doi.org/10.3748/wjg.v26.i21.2810">10.3748/wjg.v26.i21.2810</a>                                                          | China  |
| 496 | 2020 | Liu X, Mi X, Wang Z, Zhang M, Hou J, Jiang S, Wang Y, Chen C, Li W. Ginsenoside Rg3 promotes regression from hepatic fibrosis through reducing inflammation-mediated autophagy signaling pathway. <i>Cell Death Dis.</i> 2020;11(6):454. doi: <a href="https://doi.org/10.1038/s41419-020-2597-7">10.1038/s41419-020-2597-7</a>                                                                                                                     | China  |
| 497 | 2020 | Noguchi R, Kaji K, Namisaki T, Moriya K, Kawaratani H, Kitade M, Takaya H, Aihara Y, Douhara A, Asada K, Nishimura N, Miyata T, Yoshiji H. Novel oral plasminogen activator inhibitor-1 inhibitor TM5275 attenuates hepatic fibrosis under metabolic syndrome via suppression of activated hepatic stellate cells in rats. <i>Mol Med Rep.</i> 2020;22(4):2948-56. doi: <a href="https://doi.org/10.3892/mmr.2020.11360">10.3892/mmr.2020.11360</a> | Japan  |
| 498 | 2020 | Xiong J, Ni J, Chen C, Wang K. miR-148a-3p regulates alcoholic liver fibrosis through targeting ERBB3. <i>Int J Mol Med.</i> 2020;46(3):1003-12. doi: <a href="https://doi.org/10.3892/ijmm.2020.4655">10.3892/ijmm.2020.4655</a>                                                                                                                                                                                                                   | China  |
| 499 | 2020 | Xiao L, Zhang H, Yang X, Mahati S, Wu G, Xiaheding Y, Bao YX, Xiao H. Role of phosphatidylinositol 3-kinase signaling pathway in radiation-induced liver injury. <i>Kaohsiung J Med Sci.</i> 2020;36(12):990-7. doi: <a href="https://doi.org/10.1002/kjm2.12279">10.1002/kjm2.12279</a>                                                                                                                                                            | China  |
| 500 | 2020 | Yang YR, Bu FT, Yang Y, Li H, Huang C, Meng XM, Zhang L, Lv XW, Li J. LEFTY2 alleviates hepatic stellate cell activation and liver fibrosis by regulating the TGF- $\beta$ 1/Smad3 pathway. <i>Mol Immunol.</i> 2020;126:31-9. doi: <a href="https://doi.org/10.1016/j.molimm.2020.07.012">10.1016/j.molimm.2020.07.012</a>                                                                                                                         | China  |
| 501 | 2020 | Kuo CY, Chiu V, Hsieh PC, Huang CY, Huang SJ, Tzeng IS, Tsai FM, Chen ML, Liu CT, Chen YR. Chrysophanol attenuates hepatitis B virus X protein-induced hepatic stellate cell fibrosis by regulating endoplasmic reticulum stress and ferroptosis. <i>J Pharmacol Sci.</i> 2020;144(3):172-82. doi: <a href="https://doi.org/10.1016/j.jphs.2020.07.014">10.1016/j.jphs.2020.07.014</a>                                                              | Taiwan |
| 502 | 2020 | Ma Y, Li Y, Zhang H, Wang Y, Wu C, Huang W. Malvidin induces hepatic stellate cell apoptosis via the endoplasmic reticulum stress pathway and mitochondrial pathway. <i>Food Sci Nutr.</i> 2020;8(9):5095-106. doi: <a href="https://doi.org/10.1002/fsn3.1810">10.1002/fsn3.1810</a>                                                                                                                                                               | China  |
| 503 | 2020 | Kao YH, Lin YC, Lee PH, Lin CW, Chen PH, Tai TS, Chang YC, Chou MH, Chang CY, Sun CK. Infusion of human mesenchymal stem cells improves regenerative niche in thioacetamide-injured mouse liver. <i>Tissue Eng Regen Med.</i> 2020;17(5):671-82. doi: <a href="https://doi.org/10.1007/s13770-020-00274-4">10.1007/s13770-020-00274-4</a>                                                                                                           | Taiwan |



|     |      |                                                                                                                                                                                                                                                                                                                                                                           |             |
|-----|------|---------------------------------------------------------------------------------------------------------------------------------------------------------------------------------------------------------------------------------------------------------------------------------------------------------------------------------------------------------------------------|-------------|
| 504 | 2020 | Zhu H, He C, Zhao H, Jiang W, Xu S, Li J, Ma T, Huang C. Sennoside A prevents liver fibrosis by binding DNMT1 and suppressing DNMT1-mediated PTEN hypermethylation in HSC activation and proliferation. <i>FASEB J.</i> 2020;34(11):14558-71. doi: <a href="https://doi.org/10.1096/fj.202000494RR">10.1096/fj.202000494RR</a>                                            | China       |
| 505 | 2020 | Zhu Y, Pan X, Du N, Li K, Hu Y, Wang L, Zhang J, Liu Y, Zuo L, Meng X, Hu C, Wu X, Jin J, Wu W, Chen X, Wu F, Huang Y. ASIC1a regulates miR-350/SPRY2 by N6 -methyladenosine to promote liver fibrosis. <i>FASEB J.</i> 2020;34(11):14371-88. doi: <a href="https://doi.org/10.1096/fj.202001337R">10.1096/fj.202001337R</a>                                              | China       |
| 506 | 2020 | Zhu L, Mou Q, Wang Y, Zhu Z, Cheng M. Resveratrol contributes to the inhibition of liver fibrosis by inducing autophagy via the microRNA-20a-mediated activation of the PTEN/PI3K/AKT signaling pathway. <i>Int J Mol Med.</i> 2020;46(6):2035-46. doi: <a href="https://doi.org/10.3892/ijmm.2020.4748">10.3892/ijmm.2020.4748</a>                                       | China       |
| 507 | 2020 | Cuiqiong W, Chao X, Xinling F, Yinyan J. Schisandrin B suppresses liver fibrosis in rats by targeting miR-101-5p through the TGF- $\beta$ signaling pathway. <i>Artif Cells Nanomed Biotechnol.</i> 2020;48(1):473-8. doi: <a href="https://doi.org/10.1080/21691401.2020.1717507">10.1080/21691401.2020.1717507</a>                                                      | China       |
| 508 | 2020 | Gu YF, Zhang Y, Yue FL, Li ST, Zhang ZQ, Li J, Bai X. Synthesis of novel 2-(pyridin-2-yl) pyrimidine derivatives and study of their anti-fibrosis activity. <i>Molecules</i> 2020;25(22):5226. doi: <a href="https://doi.org/10.3390/molecules25225226">10.3390/molecules25225226</a>                                                                                     | China       |
| 509 | 2021 | Li J, Dong S, Ye M, Peng G, Luo J, Wang C, Wang J, Zhao Q, Chang Y, Wang H. MicroRNA-489-3p represses hepatic stellate cells activation by negatively regulating the JAG1/Notch3 signaling pathway. <i>Dig Dis Sci.</i> 2021;66(1):143-50. doi: <a href="https://doi.org/10.1007/s10620-020-06174-w">10.1007/s10620-020-06174-w</a>                                       | China       |
| 510 | 2021 | An L, Lin Y, Li L, Kong M, Lou Y, Wu J, Liu Z. Integrating network pharmacology and experimental validation to investigate the effects and mechanism of Astragalus flavonoids against hepatic fibrosis. <i>Front Pharmacol.</i> 2021;11:618262. doi: <a href="https://doi.org/10.3389/fphar.2020.618262">10.3389/fphar.2020.618262</a>                                    | China       |
| 511 | 2021 | Lin X, Li Y, Zhang X, Wei Y, Wen S, Lu Z, Huang Q, Wei J. Tormentic acid inhibits hepatic stellate cells activation via blocking PI3K/Akt/mTOR and NF- $\kappa$ B signalling pathways. <i>Cell Biochem Funct.</i> 2021;39(1):77-87. doi: <a href="https://doi.org/10.1002/cbf.3564">10.1002/cbf.3564</a> . <i>Retraction in: Cell Biochem Funct.</i> 2021; PMID: 32564421 | China / USA |
| 512 | 2021 | Lee IH, Im E, Lee HJ, Sim DY, Lee JH, Jung JH, Park JE, Shim BS, Kim SH. Apoptotic and antihepatofibrotic effect of honokiol via activation of GSK3 $\beta$ and suppression of Wnt/ $\beta$ -catenin pathway in hepatic stellate cells. <i>Phytother Res.</i> 2021;35(1):452-62. doi: <a href="https://doi.org/10.1002/ptr.6824">10.1002/ptr.6824</a>                     | Korea       |
| 513 | 2021 | Jia WQ, Zhou TC, Dai JW, Liu ZN, Zhang YF, Zang DD, Lv XW. CD73 regulates hepatic stellate cells activation and proliferation through Wnt/ $\beta$ -catenin signaling pathway. <i>Eur J Pharmacol.</i> 2021;890:173667. doi: <a href="https://doi.org/10.1016/j.ejphar.2020.173667">10.1016/j.ejphar.2020.173667</a>                                                      | China       |
| 514 | 2021 | Li B, Liu J, Xin X, Zhang L, Zhou J, Xia C, Zhu W, Yu H. MiR-34c promotes hepatic stellate cell activation and liver fibrogenesis                                                                                                                                                                                                                                         | China       |

|     |      |                                                                                                                                                                                                                                                                                                                                                            |       |
|-----|------|------------------------------------------------------------------------------------------------------------------------------------------------------------------------------------------------------------------------------------------------------------------------------------------------------------------------------------------------------------|-------|
|     |      | by suppressing ACSL1 expression. Int J Med Sci. 2021;18(3):615-25. doi: 10.7150/ijms.51589                                                                                                                                                                                                                                                                 |       |
| 515 | 2021 | Kong L, Huang H, Luan S, Liu H, Ye M, Wu F. Inhibition of ASIC1a-mediated ERS improves the activation of HSCs and copper transport under copper load. Front Pharmacol. 2021;12:653272. doi: 10.3389/fphar.2021.653272                                                                                                                                      | China |
| 516 | 2021 | Fang B, Wen S, Li Y, Bai F, Wei Y, Xiong Y, Huang Q, Lin X. Prediction and verification of target of helenalin against hepatic stellate cell activation based on miR-200a-mediated PI3K/Akt and NF-κB pathways. Int Immunopharmacol. 2021;92:107208. doi: 10.1016/j.intimp.2020.107208                                                                     | China |
| 517 | 2021 | Sommerhalder C, Cummins CB, Wang X, Ramdas D, Lopez ON, Gu Y, Zhou J, Radhakrishnan RS. HJC0416 attenuates fibrogenesis in activated hepatic stellate cells via STAT3 and NF-κB pathways. J Surg Res. 2021;261:334-42. doi: 10.1016/j.jss.2020.12.045                                                                                                      | USA   |
| 518 | 2021 | Zhang SP, Zhang C, Li LH, Chen YY, Zhu L, Liu XP, Li P. [Prediction of anti-liver fibrosis effect of Piperis Longi Fructus based on network pharmacology]. Zhongguo Zhong Yao Za Zhi 2021;46(4):845-54. Chinese. doi: 10.19540/j.cnki.cjmm.20201118.402                                                                                                    | China |
| 519 | 2021 | Gao HJ, Pang HS, Sun XD, Zhang T, Jing T, Wang XL, Mo XJ, Hu W. [Effects of persistent Echinococcus multilocularis infections on hepatic fibrosis in mice]. Zhongguo Xue Xi Chong Bing Fang Zhi Za Zhi 2021;33(1):54-61. Chinese. doi: 10.16250/j.32.1374.2020282                                                                                          | China |
| 520 | 2021 | Huang W, Ji R, Ge S, Zhou D, Liu Z, Sun Y, Huang W, Lu C. MicroRNA-92b-3p promotes the progression of liver fibrosis by targeting CREB3L2 through the JAK/STAT signaling pathway. Pathol Res Pract. 2021;219:153367. doi: 10.1016/j.prp.2021.153367                                                                                                        | China |
| 521 | 2021 | Mo C, Xie S, Zeng T, Lai Y, Huang S, Zhou C, Yan W, Huang S, Gao L, Lv Z. Ginsenoside-Rg1 acts as an IDO1 inhibitor, protects against liver fibrosis via alleviating IDO1-mediated the inhibition of DCs maturation. Phytomedicine 2021;84:153524. doi: 10.1016/j.phymed.2021.153524                                                                       | China |
| 522 | 2021 | Cai S, Wu L, Yuan S, Liu G, Wang Y, Fang L, Xu D. Carvacrol alleviates liver fibrosis by inhibiting TRPM7 and modulating the MAPK signaling pathway. Eur J Pharmacol. 2021;898:173982. doi: 10.1016/j.ejphar.2021.173982                                                                                                                                   | China |
| 523 | 2021 | Li Y, Luo Y, Zhang X, Lin X, He M, Liao M. Correction: Yan, L., et al. Combined taurine, epigallocatechin gallate and genistein therapy reduces HSC-T6 cell proliferation and modulates the expression of fibrogenic factors. Int. J. Mol. Sci. 2013, 14(10), 20543-54. doi: 10.3390/ijms22052343. Erratum: Int J Mol Sci. 2021;22(5):2343. PMID: 33653018 | China |
| 524 | 2021 | Zhang YJ, He Q, You SJ, Ma JJ, Wu XM, Liu C. Mechanism of hepatic stellate cell proliferation and apoptosis in rats by promoting circulation, removing stasis, and dredging collaterals based on the theory of liver collateral disease. Ann Palliat Med. 2021;10(4):3648-56. doi: 10.21037/apm-20-1545                                                    | China |

|     |      |                                                                                                                                                                                                                                                                                                                                                                                                                                                                    |       |
|-----|------|--------------------------------------------------------------------------------------------------------------------------------------------------------------------------------------------------------------------------------------------------------------------------------------------------------------------------------------------------------------------------------------------------------------------------------------------------------------------|-------|
| 525 | 2021 | Liang J, Yuan H, Xu L, Wang F, Bao X, Yan Y, Wang H, Zhang C, Jin R, Ma L, Zhang J, Huri L, Su X, Xiao R, Ma Y. Study on the effect of Mongolian medicine Qiwei Qinggan powder on hepatic fibrosis through JAK2/STAT3 pathway. <i>Biosci Biotechnol Biochem.</i> 2021;85(4):775-85. doi: <a href="https://doi.org/10.1093/bbb/zbab001">10.1093/bbb/zbab001</a>                                                                                                     | China |
| 526 | 2021 | Park JW, Kim MJ, Kim SE, Kim HJ, Jeon YC, Shin HY, Park SJ, Jang MK, Kim DJ, Park CK, Choi EK. Increased expression of S100B and RAGE in a mouse model of bile duct ligation-induced liver fibrosis. <i>J Korean Med Sci.</i> 2021;36(14):e90. doi: <a href="https://doi.org/10.3346/jkms.2021.36.e90">10.3346/jkms.2021.36.e90</a>                                                                                                                                | Korea |
| 527 | 2021 | Cui B, Yang Z, Wang S, Guo M, Li Q, Zhang Q, Bi X. The protective role of protocatechuic acid against chemically induced liver fibrosis in vitro and in vivo. <i>Pharmazie</i> 2021;76(5):232-8. doi: <a href="https://doi.org/10.1691/ph.2021.0909">10.1691/ph.2021.0909</a>                                                                                                                                                                                      | China |
| 528 | 2021 | Shuai C, Xia GQ, Yuan F, Wang S, Lv XW. CD39-mediated ATP-adenosine signalling promotes hepatic stellate cell activation and alcoholic liver disease. <i>Eur J Pharmacol.</i> 2021;905:174198. doi: <a href="https://doi.org/10.1016/j.ejphar.2021.174198">10.1016/j.ejphar.2021.174198</a>                                                                                                                                                                        | China |
| 529 | 2021 | Wang H, Che J, Cui K, Zhuang W, Li H, Sun J, Chen J, Wang C. Schisantherin A ameliorates liver fibrosis through TGF- $\beta$ 1-mediated activation of TAK1/MAPK and NF- $\kappa$ B pathways in vitro and in vivo. <i>Phytomedicine</i> 2021;88:153609. doi: <a href="https://doi.org/10.1016/j.phymed.2021.153609">10.1016/j.phymed.2021.153609</a>                                                                                                                | China |
| 530 | 2021 | Zhang C, Li L, Hou S, Shi Z, Xu W, Wang Q, He Y, Gong Y, Fang Z, Yang Y. Astragaloside IV inhibits hepatocellular carcinoma by continually suppressing the development of fibrosis and regulating pSmad3C/3L and Nrf2/HO-1 pathways. <i>J Ethnopharmacol.</i> 2021;279:114350. doi: <a href="https://doi.org/10.1016/j.jep.2021.114350">10.1016/j.jep.2021.114350</a>                                                                                              | China |
| 531 | 2021 | Fan X, Deng J, Shi T, Wen H, Li J, Liang Z, Lei F, Liu D, Zhang H, Liang Y, Hao X, Wang Z. Design, synthesis and bioactivity study of evodiamine derivatives as multifunctional agents for the treatment of hepatocellular carcinoma. <i>Bioorg Chem.</i> 2021;114:105154. doi: <a href="https://doi.org/10.1016/j.bioorg.2021.105154">10.1016/j.bioorg.2021.105154</a>                                                                                            | China |
| 532 | 2021 | Huang Z, Ding M, Dong Y, Ma M, Song X, Liu Y, Gao Z, Guan H, Chu Y, Feng H, Wang X, Liu H. Targeted truncated TGF- $\beta$ receptor type II delivery to fibrotic liver by PDGF $\beta$ receptor-binding peptide modification for improving the anti- fibrotic activity against hepatic fibrosis in vitro and in vivo. <i>Int J Biol Macromol.</i> 2021;188:941-9. doi: <a href="https://doi.org/10.1016/j.ijbiomac.2021.08.055">10.1016/j.ijbiomac.2021.08.055</a> | China |
| 533 | 2021 | Jiang H, Liu J, Zhang K, Zeng Q. Saikosaponin D inhibits the proliferation and promotes the apoptosis of rat hepatic stellate cells by inducing autophagosome formation. <i>Evid Based Complement Alternat Med.</i> 2021;2021:5451758. doi: <a href="https://doi.org/10.1155/2021/5451758">10.1155/2021/5451758</a>                                                                                                                                                | China |
| 534 | 2021 | Zhang J, Yang L, Han X, Li C, Liu R, Ma Z, Han B, Xie R, Yang Q. [Endoplasmic reticulum stress in hepatic stellate cells induced by tunicamycin promotes apoptosis and cell cycle arrest]. <i>Xi Bao Yu Fen Zi Mian Yi Xue Za Zhi.</i> 2021;37(9):794-800. PMID: <a href="https://pubmed.ncbi.nlm.nih.gov/34533126/">34533126</a>                                                                                                                                  | China |

|     |      |                                                                                                                                                                                                                                                                                                                                                                                                            |                |
|-----|------|------------------------------------------------------------------------------------------------------------------------------------------------------------------------------------------------------------------------------------------------------------------------------------------------------------------------------------------------------------------------------------------------------------|----------------|
| 535 | 2021 | Zhang C, Yan Y, Gao X, Ma Y. [Therapeutic mechanism of the Mongolian medicine Qiwei Qinggan Powder against liver fibrosis based on UHPLC-TOF-MS combined with network pharmacological methods]. <i>Nan Fang Yi Ke Da Xue Xue Bao.</i> 2021;41(8):1131-41. doi: <a href="https://doi.org/10.12122/j.issn.1673-4254.2021.08.02">10.12122/j.issn.1673-4254.2021.08.02</a>                                     | China          |
| 536 | 2021 | Gu Z, Fang L, Ma P. The angiotensin-converting enzyme inhibitor, captopril, suppressed hepatic stellate cell activation via NF-kappaB or wnt3α/β-catenin pathway. <i>Bioengineered</i> 2021;12(1):8370-7. doi: <a href="https://doi.org/10.1080/21655979.2021.1987091">10.1080/21655979.2021.1987091</a>                                                                                                   | China          |
| 537 | 2021 | Wu TH, Wang PW, Lin TY, Yang PM, Li WT, Yeh CT, Pan TL. Antioxidant properties of red raspberry extract alleviate hepatic fibrosis via inducing apoptosis and transdifferentiation of activated hepatic stellate cells. <i>Biomed Pharmacother.</i> 2021;144:112284. doi: <a href="https://doi.org/10.1016/j.biopha.2021.112284">10.1016/j.biopha.2021.112284</a>                                          | Taiwan         |
| 538 | 2021 | Zhang L, Gao J, Zhou D, Wang X, Li J, Wang J, Chen H, Xie X, Chen T. Profiles of messenger RNAs and MicroRNAs in hypoxia-induced hepatic stellate cells. <i>Ann Transl Med.</i> 2021;9(18):1451. doi: <a href="https://doi.org/10.21037/atm-21-4215">10.21037/atm-21-4215</a>                                                                                                                              | China          |
| 539 | 2021 | Li Z, Zhao L, Xia Y, Chen J, Hua M, Sun Y. Schisandrin B attenuates hepatic stellate cell activation and promotes apoptosis to protect against liver fibrosis. <i>Molecules</i> 2021;26(22):6882. doi: <a href="https://doi.org/10.3390/molecules26226882">10.3390/molecules26226882</a>                                                                                                                   | China          |
| 540 | 2021 | Lee SW, Kim SM, Hur W, Kang BY, Lee HL, Nam H, Yoo SH, Sung PS, Kwon JH, Jang JW, Kim SJ, Yoon SK. Tenofovir disoproxil fumarate directly ameliorates liver fibrosis by inducing hepatic stellate cell apoptosis via downregulation of PI3K/Akt/mTOR signaling pathway. <i>PLoS One</i> 2021;16(12):e0261067. doi: <a href="https://doi.org/10.1371/journal.pone.0261067">10.1371/journal.pone.0261067</a> | China          |
| 541 | 2022 | Krishnan V, Subramaniam S, Chia-Chuan C, Venkatachalam B, Thomas Cheeran A, Chi-Ying F H. Anticancer activity of <i>Leonurus sibiricus</i> L.: Possible involvement of intrinsic apoptotic pathway. <i>Nutr Cancer</i> 2022;74(1):225-36. doi: <a href="https://doi.org/10.1080/01635581.2020.1870702">10.1080/01635581.2020.1870702</a>                                                                   | India / Taiwan |
| 542 | 2022 | Yuan S, Wei C, Liu G, Zhang L, Li J, Li L, Cai S, Fang L. Sorafenib attenuates liver fibrosis by triggering hepatic stellate cell ferroptosis via HIF-1α/SLC7A11 pathway. <i>Cell Prolif.</i> 2022;55(1):e13158. doi: <a href="https://doi.org/10.1111/cpr.13158">10.1111/cpr.13158</a>                                                                                                                    | China          |
| 543 | 2022 | Fu W, Zhao Y, Xie J, Yang Y, Xiao P. Identification of anti-hepatic fibrosis components in <i>Periplaneta americana</i> based on spectrum-effect relationship and chemical component separation. <i>Biomed Chromatogr.</i> 2022;36(3):e5286. doi: <a href="https://doi.org/10.1002/bmc.5286">10.1002/bmc.5286</a>                                                                                          | Korea          |
| 544 | 2022 | Lin L, Li J, Yang S, Zhang R, Hu C, Chen Y, Tian Z, Ma W, Feng Y, Liu N, Liu J, Yang Y, Chen T, Zhao Y, He Y, Yan T. MAPK p38/Ulk1 pathway inhibits autophagy and induces IL-1β expression in hepatic stellate cells. <i>Am J Physiol Gastrointest Liver Physiol.</i> 2022;322(3):G360-G367. doi: <a href="https://doi.org/10.1152/ajpgi.00230.2021">10.1152/ajpgi.00230.2021</a>                          | China          |
| 545 | 2022 | Yang H, Zhang L, Chen J, Zhang X, Zhao Z, Zhao L. Heme Oxygenase-1 inhibits the proliferation of hepatic stellate cells by activating PPARγ and suppressing NF-κB. <i>Comput Math Methods Med.</i> 2022;2022:8920861. doi: <a href="https://doi.org/10.1155/2022/8920861">10.1155/2022/8920861</a>                                                                                                         | China          |

|     |      |                                                                                                                                                                                                                                                                                                                                                                                                                                                       |        |
|-----|------|-------------------------------------------------------------------------------------------------------------------------------------------------------------------------------------------------------------------------------------------------------------------------------------------------------------------------------------------------------------------------------------------------------------------------------------------------------|--------|
| 546 | 2022 | Chen Z, Lin Z, Yu J, Zhong H, Zhuo X, Jia C, Wan Y. Mitofusin-2 restrains hepatic stellate cells' proliferation via PI3K/Akt signaling pathway and inhibits liver fibrosis in rats. <i>J Healthc Eng.</i> 2022;2022:6731335. doi: <a href="https://doi.org/10.1155/2022/6731335">10.1155/2022/6731335</a>                                                                                                                                             | China  |
| 547 | 2022 | Wan LY, Peng H, Ni YR, Jiang XP, Wang JJ, Zhang YQ, Ma L, Li R, Han L, Tan Y, Li JM, Cai WL, Yuan WF, Liang JJ, Huang L, Wu X, Zhou Q, Cheng QN, Yang X, Liu MY, Ai WB, Liu CB, Zhang H, Wu JF. The miR-23b/27b/24-1 cluster inhibits hepatic fibrosis by inactivating hepatic stellate cells. <i>Cell Mol Gastroenterol Hepatol.</i> 2022;13(5):1393-412. doi: <a href="https://doi.org/10.1016/j.jcmgh.2022.01.016">10.1016/j.jcmgh.2022.01.016</a> | China  |
| 548 | 2022 | He Z, Chen S, Pan T, Li A, Wang K, Lin Z, Liu W, Wang Y, Wang Y. Ginsenoside Rg2 ameliorating CDAHFD-induced hepatic fibrosis by regulating AKT/mTOR-mediated autophagy. <i>J Agric Food Chem.</i> 2022;70(6):1911-22. doi: <a href="https://doi.org/10.1021/acs.jafc.1c07578">10.1021/acs.jafc.1c07578</a>                                                                                                                                           | China  |
| 549 | 2022 | Zhang T, Yang Y, Wang B, Wang L, Wang D, Cao N, Shi J. XSSJS inhibits hepatic fibrosis by promoting the miR-29b-3p/VEGFA axis in vitro and in vivo. <i>Biosci Rep.</i> 2022;42(2):BSR20212241. doi: <a href="https://doi.org/10.1042/BSR20212241">10.1042/BSR20212241</a>                                                                                                                                                                             | China  |
| 550 | 2022 | Hao LS, Song J, Zhang MT, Song XJ, Jiang MY, Ji JX, Mo YB, Wang J. [Effects of adenovirus-mediated shRNA down-regulates PTEN expression on fibril-binding proteins vinculin, filamin A and cortactin in activated hepatic stellate cells]. <i>Zhonghua Gan Zang Bing Za Zhi.</i> 2022;30(1):38-44. doi: <a href="https://doi.org/10.3760/cma.j.cn501113-20201230-00691">10.3760/cma.j.cn501113-20201230-00691</a>                                     | China  |
| 551 | 2022 | Liu Z, Xiang H, Xiang D, Xiao S, Xiang H, Xiao J, Ren H, Hu P, Liu H, Peng M. Revealing potential anti-fibrotic mechanism of Ganxianfang formula based on RNA sequence. <i>Chin Med.</i> 2022;17(1):23. doi: <a href="https://doi.org/10.1186/s13020-022-00579-7">10.1186/s13020-022-00579-7</a>                                                                                                                                                      | China  |
| 552 | 2022 | Chen D, Chen J, Chen Y, Chen F, Wang X, Huang Y. Interleukin-10 regulates starvation-induced autophagy through the STAT3-mTOR-p70s6k axis in hepatic stellate cells. <i>Exp Biol Med (Maywood)</i> 2022;15353702221080435. doi: <a href="https://doi.org/10.1177/15353702221080435">10.1177/15353702221080435</a>                                                                                                                                     | China  |
| 553 | 2022 | Gao J, Shi Y, Han Y, Tang X, Bi R, Pan L, Lai X. One-way intestinal perfusion of PVP/VA-poloxamer 188-curcuma longa L. extract solid dispersion in rats in vivo and its effect on HSC-T6 cell proliferation. <i>AAPS PharmSciTech.</i> 2022;23(3):83. doi: <a href="https://doi.org/10.1208/s12249-022-02228-6">10.1208/s12249-022-02228-6</a>                                                                                                        | China  |
| 554 | 2022 | Li J, Feng W, Dai R, Li B. Rational design, synthesis and activities of phenanthrene derivatives against hepatic fibrosis. <i>Fitoterapia</i> 2022;105176. doi: <a href="https://doi.org/10.1016/j.fitote.2022.105176">10.1016/j.fitote.2022.105176</a>                                                                                                                                                                                               | China  |
| 555 | 2022 | Rauchbach E, Zeigerman H, Abu-Halaka D, Tirosh O. Cholesterol induces oxidative stress, mitochondrial damage and death in hepatic stellate cells to mitigate liver fibrosis in mice model of NASH. <i>Antioxidants (Basel)</i> 2022;11(3):536. doi: <a href="https://doi.org/10.3390/antiox11030536">10.3390/antiox11030536</a>                                                                                                                       | Israel |
| 556 | 2022 | Jiang YC, Han X, Dou JY, Yuan MH, Zhou MJ, Cui ZY, Lian LH, Nan JX, Zhang X, Wu YL. Protective role of Siberian onions against toxin-induced liver dysfunction: an insight into health-promoting effects. <i>Food Funct.</i> 2022;13(8):4678-90. doi: <a href="https://doi.org/10.1039/d1fo00000a">10.1039/d1fo00000a</a>                                                                                                                             | China  |

|     |      |                                                                                                                                                                                                                                                                                                                                                                                          |                                           |
|-----|------|------------------------------------------------------------------------------------------------------------------------------------------------------------------------------------------------------------------------------------------------------------------------------------------------------------------------------------------------------------------------------------------|-------------------------------------------|
|     |      | <a href="https://doi.org/10.1039/d1fo04404d">10.1039/d1fo04404d</a>                                                                                                                                                                                                                                                                                                                      |                                           |
| 557 | 2022 | Qiu JL, Zhang GF, Chai YN, Han XY, Zheng HT, Li XF, Duan F, Chen LY. Ligustrazine attenuates liver fibrosis by targeting miR-145 mediated TGF- $\beta$ /Smad signaling in an animal model of biliary atresia. J Pharmacol Exp Ther. 2022;JPET-AR-2021-001020. doi: <a href="https://doi.org/10.1124/jpet.121.001020">10.1124/jpet.121.001020</a> . Epub ahead of print.                  | China                                     |
| 558 | 2022 | Li BL, Liang HJ, Li QR, Wang Q, Ao ZY, Fan YW, Zhang WJ, Lian X, Chen JY, Yuan J, Wu JW. Euryachincoside, a novel phenolic glycoside with anti-hepatic fibrosis activity from Eurya chinensis. Planta Med. 2022. doi: <a href="https://doi.org/10.1055/a-1828-2671">10.1055/a-1828-2671</a> . Epub ahead of print.                                                                       | China                                     |
| 559 | 2022 | Liu Z, Zhou S, Zhang Y, Zhao M. Rat bone marrow mesenchymal stem cells (BMSCs) inhibit liver fibrosis by activating GSK3 $\beta$ and inhibiting the Wnt3a/ $\beta$ -catenin pathway. Infect Agent Cancer. 2022;17(1):17. doi: <a href="https://doi.org/10.1186/s13027-022-00432-4">10.1186/s13027-022-00432-4</a>                                                                        | China                                     |
| 560 | 2022 | Huang S, Wang Y, Xie S, Lai Y, Mo C, Zeng T, Kuang S, Zhou C, Zeng Z, Chen Y, Huang S, Gao L, Lv Z. Isoliquiritigenin alleviates liver fibrosis through caveolin-1-mediated hepatic stellate cells ferroptosis in zebrafish and mice. Phytomedicine 2022;101:154117. doi: <a href="https://doi.org/10.1016/j.phymed.2022.154117">10.1016/j.phymed.2022.154117</a> . Epub ahead of print. | China                                     |
| 561 | 2022 | Chen S, He Z, Xie W, Chen X, Lin Z, Ma J, Liu Z, Yang S, Wang Y. Ginsenoside Rh2 attenuates CDAHFD-induced liver fibrosis in mice by improving intestinal microbial composition and regulating LPS-mediated autophagy. Phytomedicine 2022;101:154121. doi: <a href="https://doi.org/10.1016/j.phymed.2022.154121">10.1016/j.phymed.2022.154121</a> . Epub ahead of print.                | China                                     |
| 562 | 2022 | Schröder SK, Schüler HM, Petersen KV, Tesauro C, Knudsen BR, Pedersen FS, Krus F, Buhl EM, Roeb E, Roderfeld M, Borojevic R, Almeida JL, Weiskirchen R. Genetic and molecular characterization of the immortalized murine hepatic stellate cell line GRX. Cells 2022;11:1504. doi: <a href="https://doi.org/10.3390/cells11091504">10.3390/cells11091504</a>                             | Germany /<br>Denmark /<br>USA /<br>Brazil |
