# Supplementary material for: Genetic Characterization of Rat Hepatic Stellate Cell Line HSC-T6 for In Vitro Cell Line Authentication
Source: Cells. 2022 May 29;11(11):1783. doi: 10.3390/cells11111783 (PMC9179542; doi:10.3390/cells11111783)
Supplement: Supplementary file 1 [file cells-11-01783-s001.zip]

Archive with 5 entries (5 files):
- Figure S1 to Figure S6.pdf
- Figure S7.pdf
- Table S1.pdf
- Table S2.pdf
- Table S3.xlsx
