# Supplementary material for: Genetic Characterization of Rat Hepatic Stellate Cell Line HSC-T6 for In Vitro Cell Line Authentication
Source: Cells. 2022 May 29;11(11):1783. doi: 10.3390/cells11111783 (PMC9179542; doi:10.3390/cells11111783)
Supplement: Supplementary file 1 [file cells-11-01783-s001.zip › Table S3.xlsx]

## Sheet: merged_abundances
Table S3. Gene expression in HSC-T6 cells under basal culture conditions as determined by next generation mRNA sequencing
Transcript_Id	Transcript_length	Effective_length	Estimated_counts	TPM	Gene_Id	Gene_name	Gene_description
ENSRNOT00000030919.5	830	631.767	231412	9890.55	ENSRNOG00000022619.6	Fth1	ferritin heavy chain 1 [Source:RGD Symbol;Acc:2635]
ENSRNOT00000022846.5	472	275.844	77933.1	7628.69	ENSRNOG00000042499.1	LOC100364435	thymosin, beta 10-like [Source:RGD Symbol;Acc:2321025]
ENSRNOT00000013608.6	1389	1190.77	278132	6306.9	ENSRNOG00000009439.6	Eef1a1	eukaryotic translation elongation factor 1 alpha 1 [Source:RGD Symbol;Acc:67387]
ENSRNOT00000001265.5	483	286.505	62847.4	5923.06	ENSRNOG00000000957.5	Rpl21	ribosomal protein L21 [Source:RGD Symbol;Acc:68390]
ENSRNOT00000013745.7	740	541.804	110733	5518.57	ENSRNOG00000010208.7	Timp1	TIMP metallopeptidase inhibitor 1 [Source:RGD Symbol;Acc:621675]
ENSRNOT00000018820.5	496	299.114	61076.3	5513.49	ENSRNOG00000013874.5	Rplp1	ribosomal protein lateral stalk subunit P1 [Source:RGD Symbol;Acc:621774]
ENSRNOT00000005577.7	305	126.419	23400.9	4998.15	ENSRNOG00000004196.7	LOC108352650	40S ribosomal protein S29 [Source:RGD Symbol;Acc:11376557]
ENSRNOT00000013538.6	505	307.942	54763	4801.86	ENSRNOG00000009884.6	Lgals1	galectin 1 [Source:RGD Symbol;Acc:69355]
ENSRNOT00000050443.4	1002	803.767	136895	4598.86	ENSRNOG00000018630.7	LOC108351137	glyceraldehyde-3-phosphate dehydrogenase [Source:RGD Symbol;Acc:11369796]
ENSRNOT00000042459.4	1263	1064.77	172698	4379.5	ENSRNOG00000034254.4	Actb	actin, beta [Source:RGD Symbol;Acc:628837]
ENSRNOT00000041328.3	1295	1096.77	172352	4243.2	ENSRNOG00000030963.3	LOC108351137	glyceraldehyde-3-phosphate dehydrogenase [Source:RGD Symbol;Acc:11369796]
ENSRNOT00000001518.6	1093	894.767	138921	4192.27	ENSRNOG00000001148.6	Rplp0	ribosomal protein lateral stalk subunit P0 [Source:RGD Symbol;Acc:621247]
ENSRNOT00000028315.6	552	354.27	54272.4	4136.53	ENSRNOG00000020843.6	LOC100360087	ferritin light chain 1-like [Source:RGD Symbol;Acc:2322860]
ENSRNOT00000013393.6	297	120.157	18079.3	4062.77	ENSRNOG00000010105.6	S100a11	S100 calcium binding protein A11 [Source:RGD Symbol;Acc:1303295]
ENSRNOT00000089027.1	1656	1457.77	217545	4029.51	ENSRNOG00000051885.1	LOC100360413	eukaryotic translation elongation factor 1 alpha 1-like [Source:RGD Symbol;Acc:2322143]
ENSRNOT00000022897.4	342	156.866	20334	3500.14	ENSRNOG00000016961.4	Rps27	ribosomal protein S27 [Source:RGD Symbol;Acc:621045]
ENSRNOT00000022184.4	543	345.316	43777.1	3423.11	ENSRNOG00000016411.4	Rps12	ribosomal protein S12 [Source:RGD Symbol;Acc:62024]
ENSRNOT00000068323.1	339	154.312	19404	3395.34	ENSRNOG00000042886.1	Rps28	ribosomal protein S28 [Source:RGD Symbol;Acc:621046]
ENSRNOT00000001383.7	793	594.767	72994.4	3313.86	ENSRNOG00000001049.7	Tpt1	tumor protein, translationally-controlled 1 [Source:RGD Symbol;Acc:621623]
ENSRNOT00000035657.3	564	366.186	44067.6	3249.44	ENSRNOG00000023344.3	Rpl23a	ribosomal protein L23a [Source:RGD Symbol;Acc:1304897]
ENSRNOT00000066885.3	824	625.767	66589	2873.3	ENSRNOG00000042271.3	Ubb	ubiquitin B [Source:RGD Symbol;Acc:621562]
ENSRNOT00000091873.1	743	544.785	57315.4	2840.77	ENSRNOG00000027864.5	Ppia	peptidylprolyl isomerase A [Source:RGD Symbol;Acc:3372]
ENSRNOT00000057931.4	427	233.09	24422.5	2829.16	ENSRNOG00000038074.4	LOC498555	similar to 60S acidic ribosomal protein P2 [Source:RGD Symbol;Acc:1590791]
ENSRNOT00000044711.4	908	709.767	73181.1	2784.03	ENSRNOG00000031506.4	Ftl1	ferritin light chain 1 [Source:RGD Symbol;Acc:61813]
ENSRNOT00000006359.5	703	504.821	51918.6	2777.01	ENSRNOG00000004741.5	Rpl19	ribosomal protein L19 [Source:RGD Symbol;Acc:621183]
ENSRNOT00000022348.6	510	312.818	31557.3	2723.95	ENSRNOG00000016580.6	Rps23	ribosomal protein S23 [Source:RGD Symbol;Acc:621039]
ENSRNOT00000025225.5	1017	818.767	81992.8	2704	ENSRNOG00000018645.5	Rpsa	ribosomal protein SA [Source:RGD Symbol;Acc:71026]
ENSRNOT00000025093.6	1164	965.767	95361.3	2666.19	ENSRNOG00000018584.6	LOC100359583	hypothetical protein LOC100359583 [Source:RGD Symbol;Acc:2323611]
ENSRNOT00000034951.5	897	698.767	68542.9	2648.63	ENSRNOG00000025936.5	Rpl6	ribosomal protein L6 [Source:RGD Symbol;Acc:619826]
ENSRNOT00000081355.1	1608	1409.77	137130	2626.48	ENSRNOG00000053468.1	Tuba1b	tubulin, alpha 1B [Source:RGD Symbol;Acc:1565476]
ENSRNOT00000047936.5	554	356.234	34411.5	2608.31	ENSRNOG00000032803.5	Rpl21	ribosomal protein L21 [Source:RGD Symbol;Acc:68390]
ENSRNOT00000046519.4	347	161.163	15216.2	2549.36	ENSRNOG00000034180.4	Rpl37	ribosomal protein L37 [Source:RGD Symbol;Acc:621204]
ENSRNOT00000014493.5	541	343.328	32336.5	2543.17	ENSRNOG00000010746.5	Rpl32	ribosomal protein L32 [Source:RGD Symbol;Acc:621203]
ENSRNOT00000016447.6	315	134.378	12551	2521.98	ENSRNOG00000012081.6	Txn1	thioredoxin 1 [Source:RGD Symbol;Acc:621157]
ENSRNOT00000041984.3	832	633.767	57686.8	2457.75	ENSRNOG00000032635.3	LOC100360117	ribosomal protein L8-like [Source:RGD Symbol;Acc:2322732]
ENSRNOT00000029791.4	552	354.27	30468	2322.21	ENSRNOG00000024603.4	Rps15	ribosomal protein S15 [Source:RGD Symbol;Acc:62026]
ENSRNOT00000019162.6	446	250.866	21408.9	2304.33	ENSRNOG00000014272.6	Rpl35	ribosomal protein L35 [Source:RGD Symbol;Acc:1303007]
ENSRNOT00000019508.6	882	683.767	58040.8	2292.01	ENSRNOG00000014179.7	Rps2	ribosomal protein S2 [Source:RGD Symbol;Acc:619887]
ENSRNOT00000081747.1	696	497.821	41901.7	2272.74	ENSRNOG00000054626.1	Rps8	ribosomal protein S8 [Source:RGD Symbol;Acc:61910]
ENSRNOT00000051134.1	348	162.01	13552.3	2258.72	ENSRNOG00000029512.1	LOC100361854	ribosomal protein S26-like [Source:RGD Symbol;Acc:2319323]
ENSRNOT00000014849.4	630	431.926	36069.7	2254.89	ENSRNOG00000011138.4	Rpl29	ribosomal protein L29 [Source:RGD Symbol;Acc:62069]
ENSRNOT00000066159.3	443	248.084	20385	2218.72	ENSRNOG00000042233.3	Rpl41	ribosomal protein L41 [Source:RGD Symbol;Acc:621210]
ENSRNOT00000017486.7	2063	1864.77	151129	2188.34	ENSRNOG00000012840.7	Sparc	secreted protein acidic and cysteine rich [Source:RGD Symbol;Acc:3742]
ENSRNOT00000010383.7	780	581.767	45955.2	2132.93	ENSRNOG00000007663.7	LOC100911372	40S ribosomal protein S6-like [Source:RGD Symbol;Acc:6493116]
ENSRNOT00000004956.4	4765	4566.77	360058	2128.9	ENSRNOG00000003357.4	Col3a1	collagen type III alpha 1 chain [Source:RGD Symbol;Acc:71029]
ENSRNOT00000025421.6	662	463.837	36487	2124.05	ENSRNOG00000018795.6	Rpl18a	ribosomal protein L18A [Source:RGD Symbol;Acc:1302976]
ENSRNOT00000028481.6	572	374.137	29366.2	2119.38	ENSRNOG00000020982.6	LOC687780	similar to Finkel-Biskis-Reilly murine sarcoma virusubiquitously expressed [Source:RGD Symbol;Acc:1597505]
ENSRNOT00000092456.1	357	169.824	13170.1	2094.02	ENSRNOG00000043348.3	LOC103693375	60S ribosomal protein L39 [Source:RGD Symbol;Acc:9312086]
ENSRNOT00000044275.3	1315	1116.77	86049.5	2080.54	ENSRNOG00000008414.8	Bsg	basigin (Ok blood group) [Source:RGD Symbol;Acc:2220]
ENSRNOT00000028060.6	476	279.723	21325.7	2058.57	ENSRNOG00000020674.6	Rpl27	ribosomal protein L27 [Source:RGD Symbol;Acc:621192]
ENSRNOT00000024430.5	1857	1658.77	126231	2054.81	ENSRNOG00000018087.5	Vim	vimentin [Source:RGD Symbol;Acc:621646]
ENSRNOT00000005311.6	5825	5626.77	423802	2033.74	ENSRNOG00000003897.6	Col1a1	collagen type I alpha 1 chain [Source:RGD Symbol;Acc:61817]
ENSRNOT00000004091.6	1865	1666.77	124881	2023.08	ENSRNOG00000003029.6	Calr	calreticulin [Source:RGD Symbol;Acc:620288]
ENSRNOT00000049535.2	545	347.305	25859.4	2010.48	ENSRNOG00000034246.2	Rps27a	ribosomal protein S27a [Source:RGD Symbol;Acc:6489478]
ENSRNOT00000081802.1	1136	937.767	68980	1986.18	ENSRNOG00000060098.1	Ptms	parathymosin [Source:RGD Symbol;Acc:621529]
ENSRNOT00000041813.5	503	306.003	22228.7	1961.46	ENSRNOG00000029627.5	LOC100359951	ribosomal protein S20-like [Source:RGD Symbol;Acc:2323094]
ENSRNOT00000067032.3	1298	1099.77	78901.4	1937.2	ENSRNOG00000016896.8	Rpl3	ribosomal protein L3 [Source:RGD Symbol;Acc:735105]
ENSRNOT00000076978.3	949	750.767	52978	1905.38	ENSRNOG00000003201.9	Rps4x	ribosomal protein S4, X-linked [Source:RGD Symbol;Acc:2324318]
ENSRNOT00000079854.1	2128	1929.77	136022	1903.24	ENSRNOG00000061216.1	Tubb5	tubulin, beta 5 class I [Source:RGD Symbol;Acc:628596]
ENSRNOT00000071965.2	1742	1543.77	108354	1895.2	ENSRNOG00000050585.2	Pgam1	phosphoglycerate mutase 1 [Source:RGD Symbol;Acc:3312]
ENSRNOT00000027305.7	1395	1196.77	83776.8	1890.19	ENSRNOG00000020075.7	Eef1g	eukaryotic translation elongation factor 1 gamma [Source:RGD Symbol;Acc:1302939]
ENSRNOT00000083951.1	765	566.767	39119.9	1863.74	ENSRNOG00000056765.1	Rpl10	ribosomal protein L10 [Source:RGD Symbol;Acc:621178]
ENSRNOT00000080216.1	1323	1124.77	75841.9	1820.7	ENSRNOG00000034254.4	Actb	actin, beta [Source:RGD Symbol;Acc:628837]
ENSRNOT00000017468.2	1600	1401.77	94377.7	1817.96	ENSRNOG00000013009.2	Ldha	lactate dehydrogenase A [Source:RGD Symbol;Acc:2996]
ENSRNOT00000079310.1	1901	1702.77	114224	1811.31	ENSRNOG00000053452.1	LOC100361457	actin, gamma 1 propeptide-like [Source:RGD Symbol;Acc:2320108]
ENSRNOT00000026576.7	806	607.767	40450.8	1797.14	ENSRNOG00000019578.7	Rps16	ribosomal protein S16 [Source:RGD Symbol;Acc:621031]
ENSRNOT00000012775.7	2190	1991.77	130796	1773.16	ENSRNOG00000008639.7	Pabpc1	poly(A) binding protein, cytoplasmic 1 [Source:RGD Symbol;Acc:619838]
ENSRNOT00000016329.6	1100	901.767	58984.2	1766.17	ENSRNOG00000011893.6	Rps3a	ribosomal protein S3a [Source:RGD Symbol;Acc:62078]
ENSRNOT00000002194.7	509	311.849	20280.9	1756.04	ENSRNOG00000001611.7	Rpl24	ribosomal protein L24 [Source:RGD Symbol;Acc:621191]
ENSRNOT00000034694.2	523	325.562	20904.1	1733.76	ENSRNOG00000028021.2	Rps13	ribosomal protein S13 [Source:RGD Symbol;Acc:621027]
ENSRNOT00000066328.3	616	417.968	26792.4	1730.85	ENSRNOG00000020595.8	Rps11	ribosomal protein S11 [Source:RGD Symbol;Acc:621026]
ENSRNOT00000042661.2	303	124.811	7879	1704.55	ENSRNOG00000030747.2	LOC685963	similar to 60S ribosomal protein L38 [Source:RGD Symbol;Acc:1587812]
ENSRNOT00000087162.1	519	321.627	20030.8	1681.66	ENSRNOG00000059900.1	Bst2	bone marrow stromal cell antigen 2 [Source:RGD Symbol;Acc:727849]
ENSRNOT00000015962.6	1105	906.767	56094	1670.37	ENSRNOG00000020660.7	Cfl1	cofilin 1 [Source:RGD Symbol;Acc:69285]
ENSRNOT00000005471.7	562	364.198	22136	1641.17	ENSRNOG00000004107.7	Rpl23	ribosomal protein L23 [Source:RGD Symbol;Acc:62067]
ENSRNOT00000010180.5	860	661.767	40181	1639.48	ENSRNOG00000007650.5	Cd63	Cd63 molecule [Source:RGD Symbol;Acc:62080]
ENSRNOT00000027073.6	504	306.973	18582	1634.5	ENSRNOG00000019974.6	Uba52	ubiquitin A-52 residue ribosomal protein fusion product 1 [Source:RGD Symbol;Acc:68344]
ENSRNOT00000047450.3	2917	2718.77	163339	1622.22	ENSRNOG00000020266.5	Eef2	eukaryotic translation elongation factor 2 [Source:RGD Symbol;Acc:61979]
ENSRNOT00000024106.7	1730	1531.77	91510.8	1613.13	ENSRNOG00000017895.7	Eno1	enolase 1 [Source:RGD Symbol;Acc:2553]
ENSRNOT00000028555.6	613	414.968	24708	1607.73	ENSRNOG00000021035.6	Rpl18	ribosomal protein L18 [Source:RGD Symbol;Acc:621182]
ENSRNOT00000042688.2	461	265.314	15781	1606.07	ENSRNOG00000032825.2	LOC100362027	ribosomal protein L30-like [Source:RGD Symbol;Acc:2318953]
ENSRNOT00000023017.5	1827	1628.77	96205	1594.89	ENSRNOG00000017123.5	B2m	beta-2 microglobulin [Source:RGD Symbol;Acc:2189]
ENSRNOT00000077564.1	348	162.01	9248.5	1541.42	ENSRNOG00000056076.1	LOC103694877	macrophage migration inhibitory factor [Source:RGD Symbol;Acc:9444736]
ENSRNOT00000008608.4	348	162.01	9248.5	1541.42	ENSRNOG00000006589.4	Mif	macrophage migration inhibitory factor [Source:RGD Symbol;Acc:621163]
ENSRNOT00000013159.5	2100	1901.77	108142	1535.42	ENSRNOG00000009920.5	LOC680121	similar to heat shock protein 8 [Source:RGD Symbol;Acc:1595502]
ENSRNOT00000057587.2	348	162.01	9144.9	1524.15	ENSRNOG00000005975.6	Rpl30	ribosomal protein L30 [Source:RGD Symbol;Acc:621201]
ENSRNOT00000073160.2	474	277.779	15668.4	1523.06	ENSRNOG00000048199.2	Rps19l2	ribosomal protein S19-like2 [Source:RGD Symbol;Acc:68440]
ENSRNOT00000071708.2	594	395.982	22313	1521.51	ENSRNOG00000047931.2	Tmsb4x	thymosin beta 4, X-linked [Source:RGD Symbol;Acc:621622]
ENSRNOT00000022983.6	2052	1853.77	104266	1518.72	ENSRNOG00000016831.6	Serpinh1	serpin family H member 1 [Source:RGD Symbol;Acc:69302]
ENSRNOT00000013588.7	525	327.54	18093.4	1491.58	ENSRNOG00000010189.8	Rps24	ribosomal protein S24 [Source:RGD Symbol;Acc:621040]
ENSRNOT00000059501.2	456	260.481	14281	1480.38	ENSRNOG00000018774.5	LOC100911847	40S ribosomal protein S14-like [Source:RGD Symbol;Acc:6490698]
ENSRNOT00000038677.5	1376	1177.77	64351.7	1475.34	ENSRNOG00000010362.7	Anxa2	annexin A2 [Source:RGD Symbol;Acc:621170]
ENSRNOT00000080988.1	1442	1243.77	67767.9	1471.21	ENSRNOG00000052802.1	Aldoa	aldolase, fructose-bisphosphate A [Source:RGD Symbol;Acc:2089]
ENSRNOT00000026341.5	681	482.821	26158	1462.88	ENSRNOG00000019459.5	Oaz1	ornithine decarboxylase antizyme 1 [Source:RGD Symbol;Acc:3219]
ENSRNOT00000005588.7	574	376.124	20362.2	1461.79	ENSRNOG00000004214.7	Rpl26	ribosomal protein L26 [Source:RGD Symbol;Acc:1310607]
ENSRNOT00000021725.7	586	388.073	20685.3	1439.26	ENSRNOG00000016220.7	Rpl12	ribosomal protein L12 [Source:RGD Symbol;Acc:1565106]
ENSRNOT00000015332.7	1973	1774.77	94485.5	1437.52	ENSRNOG00000011329.7	Pkm	pyruvate kinase M1/2 [Source:RGD Symbol;Acc:3337]
ENSRNOT00000020647.6	1444	1245.77	66011.2	1430.78	ENSRNOG00000015290.6	Tpi1	triosephosphate isomerase 1 [Source:RGD Symbol;Acc:3896]
ENSRNOT00000008276.3	712	513.821	27174.7	1428.05	ENSRNOG00000006283.3	LOC100359922	60S ribosomal protein L13-like [Source:RGD Symbol;Acc:2323122]
ENSRNOT00000012296.7	798	599.767	31220	1405.53	ENSRNOG00000009263.8	Ifi27	interferon, alpha-inducible protein 27 [Source:RGD Symbol;Acc:69404]
ENSRNOT00000077604.1	1693	1494.77	77740.1	1404.31	ENSRNOG00000058249.1	Pgk1	phosphoglycerate kinase 1 [Source:RGD Symbol;Acc:619878]
ENSRNOT00000091207.1	174	39.0581	1999	1381.95	ENSRNOG00000061425.1	Cox14	cytochrome c oxidase assembly factor COX14 [Source:RGD Symbol;Acc:1598052]
ENSRNOT00000051411.4	183	43.8393	2209.83	1361.09	ENSRNOG00000031802.4	LOC691427	similar to 6.8 kDa mitochondrial proteolipid [Source:RGD Symbol;Acc:1583946]
ENSRNOT00000029546.5	375	185.349	9335.77	1360.04	ENSRNOG00000027503.5	Rps25	ribosomal protein s25 [Source:RGD Symbol;Acc:621043]
ENSRNOT00000050223.3	1655	1456.77	72433	1342.57	ENSRNOG00000006532.5	H3f3a	H3 histone family member 3A [Source:RGD Symbol;Acc:2319910]
ENSRNOT00000027246.5	527	329.507	16345.2	1339.42	ENSRNOG00000037897.3	Rps19l2	ribosomal protein S19-like2 [Source:RGD Symbol;Acc:68440]
ENSRNOT00000092476.1	544	346.316	17106.3	1333.75	ENSRNOG00000028505.6	Rps18	ribosomal protein S18 [Source:RGD Symbol;Acc:3595]
ENSRNOT00000078975.1	378	188.015	9222.95	1324.55	ENSRNOG00000054489.1	AABR07042821.1
ENSRNOT00000076052.2	976	777.767	37769.7	1311.25	ENSRNOG00000016810.7	Stmn1	stathmin 1 [Source:RGD Symbol;Acc:2992]
ENSRNOT00000027976.6	1039	840.767	40761.6	1309.08	ENSRNOG00000062298.1	Rpl13a	ribosomal protein L13A [Source:RGD Symbol;Acc:628697]
ENSRNOT00000025217.6	567	369.161	17847.3	1305.41	ENSRNOG00000018680.6	Rpl17	ribosomal protein L17 [Source:RGD Symbol;Acc:1303019]
ENSRNOT00000059735.3	4977	4778.77	230608	1303.02	ENSRNOG00000002052.6	Ccdc80	coiled-coil domain containing 80 [Source:RGD Symbol;Acc:69421]
ENSRNOT00000092867.1	701	502.821	24243.3	1301.87	ENSRNOG00000008551.7	Rps7	ribosomal protein S7 [Source:RGD Symbol;Acc:61907]
ENSRNOT00000014904.7	464	268.135	12598.5	1268.69	ENSRNOG00000011104.7	LOC100360057	ribosomal protein L22-like [Source:RGD Symbol;Acc:2322888]
ENSRNOT00000000603.7	715	516.821	24260.9	1267.53	ENSRNOG00000000505.7	Rpl10a	ribosomal protein L10A [Source:RGD Symbol;Acc:620497]
ENSRNOT00000054958.2	2489	2290.77	107345	1265.3	ENSRNOG00000036689.2	P4hb	prolyl 4-hydroxylase subunit beta [Source:RGD Symbol;Acc:3244]
ENSRNOT00000032015.5	451	255.637	11938	1260.95	ENSRNOG00000026605.5	Ifi27l2b	interferon, alpha-inducible protein 27 like 2B [Source:RGD Symbol;Acc:1559721]
ENSRNOT00000030428.3	1069	870.767	40336.4	1250.8	ENSRNOG00000023529.3	Rpl5	ribosomal protein L5 [Source:RGD Symbol;Acc:619825]
ENSRNOT00000083427.1	716	517.821	23917.6	1247.18	ENSRNOG00000019007.7	Rpl14	ribosomal protein L14 [Source:RGD Symbol;Acc:621180]
ENSRNOT00000075397.1	5046	4847.77	222303	1238.21	ENSRNOG00000046005.1	Scd2	stearoyl-Coenzyme A desaturase 2 [Source:RGD Symbol;Acc:621177]
ENSRNOT00000084027.1	246	83.0308	3776.18	1228.02	ENSRNOG00000060449.1	Rps21	ribosomal protein S21 [Source:RGD Symbol;Acc:621038]
ENSRNOT00000009046.8	354	167.16	7533.42	1216.89	ENSRNOG00000016387.8	Rpl34	ribosomal protein L34 [Source:RGD Symbol;Acc:1309402]
ENSRNOT00000001315.6	1516	1317.77	58648	1201.73	ENSRNOG00000000991.6	Arpc1b	actin related protein 2/3 complex, subunit 1B [Source:RGD Symbol;Acc:2155]
ENSRNOT00000040261.2	348	162.01	7188.61	1198.11	ENSRNOG00000032303.2	LOC108349682	60S ribosomal protein L35a [Source:RGD Symbol;Acc:11401413]
ENSRNOT00000082953.1	1226	1027.77	45568.6	1197.19	ENSRNOG00000051615.1	Hmgn2	high mobility group nucleosomal binding domain 2 [Source:RGD Symbol;Acc:620649]
ENSRNOT00000001894.5	1526	1327.77	57940.7	1178.29	ENSRNOG00000025001.6	Pcolce	procollagen C-endopeptidase enhancer [Source:RGD Symbol;Acc:3270]
ENSRNOT00000023935.5	809	610.767	26599	1175.93	ENSRNOG00000017418.5	Rps3	ribosomal protein S3 [Source:RGD Symbol;Acc:619888]
ENSRNOT00000026528.7	765	566.767	24421.1	1163.46	ENSRNOG00000019453.7	Rps5	ribosomal protein S5 [Source:RGD Symbol;Acc:3601]
ENSRNOT00000020265.7	700	501.821	21469.8	1155.24	ENSRNOG00000015078.7	Ifitm3	interferon induced transmembrane protein 3 [Source:RGD Symbol;Acc:1595844]
ENSRNOT00000084232.1	1209	1010.77	43198.4	1154.01	ENSRNOG00000052620.1	Rack1	receptor for activated C kinase 1 [Source:RGD Symbol;Acc:69229]
ENSRNOT00000024678.5	393	201.641	8540.16	1143.61	ENSRNOG00000018320.6	Rps15a	ribosomal protein S15a [Source:RGD Symbol;Acc:619939]
ENSRNOT00000042736.1	498	301.074	12509.8	1121.93	ENSRNOG00000028993.1	LOC102555453	60S ribosomal protein L12-like [Source:RGD Symbol;Acc:7600399]
ENSRNOT00000013461.7	1387	1188.77	49206.8	1117.69	ENSRNOG00000009378.7	Rpl4	ribosomal protein L4 [Source:RGD Symbol;Acc:619824]
ENSRNOT00000092061.1	582	384.099	15854	1114.52	ENSRNOG00000052025.1	Tle5	TLE family member 5, transcriptional modulator [Source:RGD Symbol;Acc:2731]
ENSRNOT00000046240.4	1095	896.767	36833	1109.04	ENSRNOG00000030871.4	Calm2	calmodulin 2 [Source:RGD Symbol;Acc:2258]
ENSRNOT00000015612.5	472	275.844	11253	1101.53	ENSRNOG00000011647.5	S100a6	S100 calcium binding protein A6 [Source:RGD Symbol;Acc:620264]
ENSRNOT00000030043.5	537	339.373	13767	1095.35	ENSRNOG00000026260.6	Rpl11	ribosomal protein L11 [Source:RGD Symbol;Acc:1308681]
ENSRNOT00000023132.5	889	690.767	27901.5	1090.65	ENSRNOG00000017194.5	Prdx1	peroxiredoxin 1 [Source:RGD Symbol;Acc:620039]
ENSRNOT00000028754.5	495	298.144	11839	1072.21	ENSRNOG00000021177.5	Cox8a	cytochrome c oxidase subunit 8A [Source:RGD Symbol;Acc:620638]
ENSRNOT00000035628.5	1794	1595.77	63196.3	1069.33	ENSRNOG00000008195.6	Ywhaz	tyrosine 3-monooxygenase/tryptophan 5-monooxygenase activation protein, zeta [Source:RGD Symbol;Acc:3980]
ENSRNOT00000041241.3	348	162.01	6413	1068.84	ENSRNOG00000033615.3	Mt-nd3	mitochondrially encoded NADH dehydrogenase 3 [Source:RGD Symbol;Acc:620557]
ENSRNOT00000026920.6	2338	2139.77	83653.5	1055.62	ENSRNOG00000019834.6	Hsp90ab1	heat shock protein 90 alpha family class B member 1 [Source:RGD Symbol;Acc:1303075]
ENSRNOT00000006591.7	1279	1080.77	42102.7	1051.89	ENSRNOG00000004616.8	Npm1	nucleophosmin 1 [Source:RGD Symbol;Acc:3192]
ENSRNOT00000005370.6	816	617.767	24005	1049.22	ENSRNOG00000003975.6	Pfn1	profilin 1 [Source:RGD Symbol;Acc:621825]
ENSRNOT00000003965.4	1773	1574.77	61112	1047.86	ENSRNOG00000002840.4	Atp5f1b	ATP synthase F1 subunit beta [Source:RGD Symbol;Acc:621368]
ENSRNOT00000019247.5	1057	858.767	32937.8	1035.64	ENSRNOG00000014214.5	Rpl27a	ribosomal protein L27a [Source:RGD Symbol;Acc:1309771]
ENSRNOT00000082300.1	267	97.7441	3687.2	1018.58	ENSRNOG00000051624.1	Hspe1	heat shock protein family E (Hsp10) member 1 [Source:RGD Symbol;Acc:2844]
ENSRNOT00000015152.6	1059	860.767	32468.4	1018.51	ENSRNOG00000011175.8	Hnrnpa2b1	heterogeneous nuclear ribonucleoprotein A2/B1 [Source:RGD Symbol;Acc:1310403]
ENSRNOT00000004867.6	285	111.013	4182.8	1017.38	ENSRNOG00000003670.6	Sumo2	small ubiquitin-like modifier 2 [Source:RGD Symbol;Acc:621761]
ENSRNOT00000064931.2	308	128.745	4786	1003.77	ENSRNOG00000042869.2	Atp5md	ATP synthase membrane subunit DAPIT [Source:RGD Symbol;Acc:631426]
ENSRNOT00000056151.4	541	343.328	12637	993.862	ENSRNOG00000015277.7	Serf2	small EDRK-rich factor 2 [Source:RGD Symbol;Acc:1588368]
ENSRNOT00000001545.4	549	351.293	12916	992.772	ENSRNOG00000001170.4	Cox6a1	cytochrome c oxidase subunit 6A1 [Source:RGD Symbol;Acc:2384]
ENSRNOT00000020478.7	1881	1682.77	60895	977.122	ENSRNOG00000015018.7	Pdia3	protein disulfide isomerase family A, member 3 [Source:RGD Symbol;Acc:68430]
ENSRNOT00000028557.7	2335	2136.77	77032.3	973.435	ENSRNOG00000021031.7	Grn	granulin precursor [Source:RGD Symbol;Acc:61983]
ENSRNOT00000001911.4	1624	1425.77	51278	971.122	ENSRNOG00000001409.4	Gnb2	G protein subunit beta 2 [Source:RGD Symbol;Acc:69319]
ENSRNOT00000021073.5	1021	822.767	29563.5	970.221	ENSRNOG00000015496.6	Tpm4	tropomyosin 4 [Source:RGD Symbol;Acc:3899]
ENSRNOT00000033537.5	419	225.555	8030	961.291	ENSRNOG00000027049.6	Atp5mf	ATP synthase membrane subunit f [Source:RGD Symbol;Acc:1596067]
ENSRNOT00000020676.6	617	418.968	14867	958.149	ENSRNOG00000015320.7	Atp5mc2	ATP synthase membrane subunit c locus 2 [Source:RGD Symbol;Acc:620051]
ENSRNOT00000029435.5	2799	2600.77	91596.5	950.974	ENSRNOG00000026963.6	Hsp90b1	heat shock protein 90 beta family member 1 [Source:RGD Symbol;Acc:1310482]
ENSRNOT00000050156.3	1545	1346.77	47305	948.431	ENSRNOG00000034234.3	Mt-co1	mitochondrially encoded cytochrome c oxidase I [Source:RGD Symbol;Acc:621871]
ENSRNOT00000024601.4	769	570.767	19930	942.844	ENSRNOG00000018237.4	Gstp1	glutathione S-transferase pi 1 [Source:RGD Symbol;Acc:2758]
ENSRNOT00000070805.1	225	68.7669	2390	938.446	ENSRNOG00000046316.1	Tomm6	translocase of outer mitochondrial membrane 6 [Source:RGD Symbol;Acc:1583567]
ENSRNOT00000078872.1	1140	941.767	32096.7	920.256	ENSRNOG00000052968.1	Hnrnpa3	heterogeneous nuclear ribonucleoprotein A3 [Source:RGD Symbol;Acc:727807]
ENSRNOT00000051693.4	343	157.788	5358.68	917.013	ENSRNOG00000033916.4	AC141489.1
ENSRNOT00000083156.1	1617	1418.77	48132	916.039	ENSRNOG00000060728.1	Tuba1a	tubulin, alpha 1A [Source:RGD Symbol;Acc:619717]
ENSRNOT00000030221.6	339	154.312	5174	905.353	ENSRNOG00000023086.6	LOC100360828	cAMP-regulated phosphoprotein 19-like [Source:RGD Symbol;Acc:2321330]
ENSRNOT00000085692.1	2545	2346.77	78529	903.548	ENSRNOG00000057823.1	Ubc	ubiquitin C [Source:RGD Symbol;Acc:621244]
ENSRNOT00000023806.3	1068	869.767	28455	883.379	ENSRNOG00000017708.3	AABR07073038.1	poly(rC) binding protein 1 [Source:NCBI gene;Acc:500242]
ENSRNOT00000009665.6	1282	1083.77	35287	879.164	ENSRNOG00000006865.6	Laptm4a	lysosomal protein transmembrane 4 alpha [Source:RGD Symbol;Acc:735179]
ENSRNOT00000022864.5	489	292.312	9345.71	863.29	ENSRNOG00000016912.6	Btf3	basic transcription factor 3 [Source:RGD Symbol;Acc:1308095]
ENSRNOT00000014910.5	652	453.837	14480	861.509	ENSRNOG00000011222.5	Dynll1	dynein light chain LC8-type 1 [Source:RGD Symbol;Acc:619866]
ENSRNOT00000086603.1	327	144.229	4588	858.937	ENSRNOG00000058914.1	Rbx1	ring-box 1 [Source:RGD Symbol;Acc:1308453]
ENSRNOT00000001247.7	1104	905.767	28488.9	849.28	ENSRNOG00000000938.7	Ran	RAN, member RAS oncogene family [Source:RGD Symbol;Acc:620367]
ENSRNOT00000085201.1	2426	2227.77	69424.5	841.461	ENSRNOG00000055962.1	Bgn	biglycan [Source:RGD Symbol;Acc:2207]
ENSRNOT00000044551.4	798	599.767	18527.6	834.119	ENSRNOG00000047737.1	Rpl7a	ribosomal protein L7a [Source:RGD Symbol;Acc:1307586]
ENSRNOT00000006754.6	798	599.767	18527.6	834.119	ENSRNOG00000049097.1	Rpl7a	ribosomal protein L7a [Source:RGD Symbol;Acc:1307586]
ENSRNOT00000071215.2	1116	917.767	27921.1	821.469	ENSRNOG00000047374.2	Gnas	GNAS complex locus [Source:RGD Symbol;Acc:2716]
ENSRNOT00000043171.2	321	139.194	4196.72	814.106	ENSRNOG00000031315.2	Rpl36al	ribosomal protein L36a-like [Source:RGD Symbol;Acc:621156]
ENSRNOT00000089074.1	677	478.821	14420	813.172	ENSRNOG00000054140.1	Myl6	myosin light chain 6 [Source:RGD Symbol;Acc:1589019]
ENSRNOT00000051895.2	474	277.779	8325	809.237	ENSRNOG00000030237.2	Cox7c	cytochrome c oxidase subunit 7C [Source:RGD Symbol;Acc:2300145]
ENSRNOT00000007100.5	1738	1539.77	45847	803.983	ENSRNOG00000005290.5	Ywhae	tyrosine 3-monooxygenase/tryptophan 5-monooxygenase activation protein, epsilon [Source:RGD Symbol;Acc:62000]
ENSRNOT00000000696.5	2568	2369.77	70366	801.767	ENSRNOG00000000571.6	Psap	prosaposin [Source:RGD Symbol;Acc:3423]
ENSRNOT00000009503.7	1502	1303.77	38376	794.787	ENSRNOG00000005890.7	Serbp1	Serpine1 mRNA binding protein 1 [Source:RGD Symbol;Acc:619907]
ENSRNOT00000013919.6	384	193.465	5694.03	794.711	ENSRNOG00000010306.6	H2az1	H2A.Z variant histone 1 [Source:RGD Symbol;Acc:621464]
ENSRNOT00000035240.4	573	375.137	10951	788.233	ENSRNOG00000023226.4	S100a10	S100 calcium binding protein A10 [Source:RGD Symbol;Acc:628655]
ENSRNOT00000087768.1	454	258.516	7524.92	785.97	ENSRNOG00000004814.6	Elob	elongin B [Source:RGD Symbol;Acc:621200]
ENSRNOT00000025282.6	1392	1193.77	34368.4	777.376	ENSRNOG00000018708.6	Ppp1ca	protein phosphatase 1 catalytic subunit alpha [Source:RGD Symbol;Acc:3375]
ENSRNOT00000021048.7	974	775.767	22291	775.871	ENSRNOG00000015278.7	Myl12a	myosin light chain 12A [Source:RGD Symbol;Acc:1309537]
ENSRNOT00000022977.5	946	747.767	21230.2	766.618	ENSRNOG00000016930.5	Ube2s	ubiquitin-conjugating enzyme E2S [Source:RGD Symbol;Acc:1564746]
ENSRNOT00000011208.7	1297	1098.77	30720	754.93	ENSRNOG00000008301.7	Tagln2	transgelin 2 [Source:RGD Symbol;Acc:1310840]
ENSRNOT00000086622.1	747	548.785	15260.7	750.865	ENSRNOG00000058909.1	Rps9	ribosomal protein S9 [Source:RGD Symbol;Acc:619889]
ENSRNOT00000065304.4	1401	1202.77	33271.9	746.943	ENSRNOG00000017801.7	Atf4	activating transcription factor 4 [Source:RGD Symbol;Acc:621863]
ENSRNOT00000071664.2	1584	1385.77	38244	745.185	ENSRNOG00000050519.2	Rhoa	ras homolog family member A [Source:RGD Symbol;Acc:619921]
ENSRNOT00000050090.3	240	78.9438	2177	744.613	ENSRNOG00000032740.3	Tmem258b	transmembrane protein 258 B [Source:RGD Symbol;Acc:1586604]
ENSRNOT00000043704.5	318	136.82	3764.9	743.013	ENSRNOG00000033473.5	Rpl36	ribosomal protein L36 [Source:RGD Symbol;Acc:62085]
ENSRNOT00000091596.1	1711	1512.77	41203	735.44	ENSRNOG00000036839.4	Hnrnpa1	heterogeneous nuclear ribonucleoprotein A1 [Source:RGD Symbol;Acc:69234]
ENSRNOT00000025462.6	1643	1444.77	39208	732.771	ENSRNOG00000018566.6	Ctsl	cathepsin L [Source:RGD Symbol;Acc:2448]
ENSRNOT00000004702.7	294	117.902	3184	729.196	ENSRNOG00000003542.7	Hcfc1r1	host cell factor C1 regulator 1 [Source:RGD Symbol;Acc:727975]
ENSRNOT00000001500.6	1096	897.767	24175	727.1	ENSRNOG00000001136.6	Pebp1	phosphatidylethanolamine binding protein 1 [Source:RGD Symbol;Acc:62017]
ENSRNOT00000031796.4	912	713.767	19115.4	723.134	ENSRNOG00000025602.4	Cdk4	cyclin-dependent kinase 4 [Source:RGD Symbol;Acc:621120]
ENSRNOT00000007367.6	1185	986.767	26408.4	722.634	ENSRNOG00000005387.6	Rbm3	RNA binding motif protein 3 [Source:RGD Symbol;Acc:620145]
ENSRNOT00000084674.1	898	699.767	18618.8	718.439	ENSRNOG00000055579.1	Tmbim6	transmembrane BAX inhibitor motif containing 6 [Source:RGD Symbol;Acc:3842]
ENSRNOT00000004799.5	876	677.767	18022	717.982	ENSRNOG00000003520.5	Prdx2	peroxiredoxin 2 [Source:RGD Symbol;Acc:3838]
ENSRNOT00000027860.4	2056	1857.77	48921	711.042	ENSRNOG00000020533.4	Htra1	HtrA serine peptidase 1 [Source:RGD Symbol;Acc:69235]
ENSRNOT00000022095.7	1644	1445.77	38052.8	710.688	ENSRNOG00000016460.7	Clu	clusterin [Source:RGD Symbol;Acc:3907]
ENSRNOT00000014407.5	448	252.765	6576	702.484	ENSRNOG00000010807.5	Cox6c	cytochrome c oxidase subunit 6C [Source:RGD Symbol;Acc:620616]
ENSRNOT00000003550.7	863	664.767	17239	700.219	ENSRNOG00000002632.8	Naca	nascent polypeptide associated complex subunit alpha [Source:RGD Symbol;Acc:1308642]
ENSRNOT00000023072.5	1253	1054.77	27171	695.569	ENSRNOG00000016727.5	Akr1a1	aldo-keto reductase family 1 member A1 [Source:RGD Symbol;Acc:68346]
ENSRNOT00000027734.5	763	564.785	14542	695.235	ENSRNOG00000020460.5	Banf1	barrier to autointegration factor 1 [Source:RGD Symbol;Acc:620662]
ENSRNOT00000033687.1	579	381.111	9788	693.479	ENSRNOG00000027722.1	H1f10	H1.10 linker histone [Source:RGD Symbol;Acc:1565596]
ENSRNOT00000038927.5	693	494.821	12644.5	689.993	ENSRNOG00000026716.5	LOC100360449	ribosomal protein L9-like [Source:RGD Symbol;Acc:2322107]
ENSRNOT00000080028.1	897	698.767	17781	687.092	ENSRNOG00000060229.1	Arf1	ADP-ribosylation factor 1 [Source:RGD Symbol;Acc:621270]
ENSRNOT00000004329.7	411	218.217	5536.45	685.069	ENSRNOG00000003220.7	H3f3b	H3 histone family member 3B [Source:RGD Symbol;Acc:621095]
ENSRNOT00000080421.1	972	773.767	19565.2	682.755	ENSRNOG00000058412.1	Morf4l1	mortality factor 4 like 1 [Source:RGD Symbol;Acc:1307938]
ENSRNOT00000078349.1	2770	2571.77	64336.4	675.486	ENSRNOG00000011796.7	C1r	complement C1r [Source:RGD Symbol;Acc:1309091]
ENSRNOT00000075126.1	1181	982.767	24406	670.559	ENSRNOG00000048226.1	Hmgn1	high mobility group nucleosome binding domain 1 [Source:RGD Symbol;Acc:1307761]
ENSRNOT00000009511.5	555	357.234	8868	670.292	ENSRNOG00000007048.5	Rap1b	RAP1B, member of RAS oncogene family [Source:RGD Symbol;Acc:620577]
ENSRNOT00000074829.2	1768	1569.77	38854	668.331	ENSRNOG00000050197.2	Pdia6	protein disulfide isomerase family A, member 6 [Source:RGD Symbol;Acc:628688]
ENSRNOT00000014177.5	1942	1743.77	42974	665.439	ENSRNOG00000010331.5	Ctsb	cathepsin B [Source:RGD Symbol;Acc:621509]
ENSRNOT00000043250.5	498	301.074	7388.37	662.622	ENSRNOG00000052141.1	Rps10	ribosomal protein S10 [Source:RGD Symbol;Acc:621024]
ENSRNOT00000046799.2	450	254.662	6215.96	659.075	ENSRNOG00000032605.2	Rpl32	ribosomal protein L32 [Source:RGD Symbol;Acc:621203]
ENSRNOT00000001310.7	1237	1038.77	25193.9	654.89	ENSRNOG00000000990.7	Pdap1	PDGFA associated protein 1 [Source:RGD Symbol;Acc:620442]
ENSRNOT00000022343.7	1197	998.767	24176	653.599	ENSRNOG00000016478.7	Eif5a	eukaryotic translation initiation factor 5A [Source:RGD Symbol;Acc:1308029]
ENSRNOT00000071617.1	258	91.2957	2206	652.449	ENSRNOG00000046560.1	AC109096.1
ENSRNOT00000018038.5	517	319.67	7679	648.626	ENSRNOG00000013300.5	Atp5if1	ATP synthase inhibitory factor subunit 1 [Source:RGD Symbol;Acc:2181]
ENSRNOT00000023724.6	822	623.767	14915	645.643	ENSRNOG00000017417.6	Gabarap	GABA type A receptor-associated protein [Source:RGD Symbol;Acc:61911]
ENSRNOT00000015875.7	1504	1305.77	30873.8	638.433	ENSRNOG00000023786.6	Ybx1	Y box binding protein 1 [Source:RGD Symbol;Acc:61843]
ENSRNOT00000024033.5	731	532.804	12590	638.043	ENSRNOG00000017817.5	Cox4i1	cytochrome c oxidase subunit 4i1 [Source:RGD Symbol;Acc:68374]
ENSRNOT00000012478.5	1350	1151.77	27046	634.059	ENSRNOG00000009266.6	Anp32b	acidic nuclear phosphoprotein 32 family member B [Source:RGD Symbol;Acc:621285]
ENSRNOT00000073429.2	2217	2018.77	47004	628.695	ENSRNOG00000046345.2	Rpn1	ribophorin I [Source:RGD Symbol;Acc:3594]
ENSRNOT00000017635.6	1152	953.767	22120.1	626.233	ENSRNOG00000013167.6	Hmgb2	high mobility group box 2 [Source:RGD Symbol;Acc:69291]
ENSRNOT00000029025.5	923	724.767	16763.7	624.542	ENSRNOG00000013536.7	Cdc42	cell division cycle 42 [Source:RGD Symbol;Acc:71043]
ENSRNOT00000066084.1	478	281.657	6482.96	621.503	ENSRNOG00000042903.1	Cox7a2l2	cytochrome c oxidase subunit VIIa polypeptide 2-like 2 [Source:RGD Symbol;Acc:1589992]
ENSRNOT00000059599.3	1773	1574.77	36187	620.479	ENSRNOG00000029941.3	Grina	glutamate ionotropic receptor NMDA type subunit associated protein 1 [Source:RGD Symbol;Acc:628873]
ENSRNOT00000050059.4	2414	2215.77	50885.8	620.103	ENSRNOG00000001454.7	Eif4h	eukaryotic translation initiation factor 4H [Source:RGD Symbol;Acc:1359222]
ENSRNOT00000025067.6	2562	2363.77	53672	613.104	ENSRNOG00000018294.6	Hspa5	heat shock protein family A (Hsp70) member 5 [Source:RGD Symbol;Acc:2843]
ENSRNOT00000028887.6	1160	961.767	21786	611.644	ENSRNOG00000021264.6	Pcna	proliferating cell nuclear antigen [Source:RGD Symbol;Acc:3269]
ENSRNOT00000008736.6	1151	952.767	21561	611.045	ENSRNOG00000006542.6	Atp6v0c	ATPase H+ transporting V0 subunit C [Source:RGD Symbol;Acc:621394]
ENSRNOT00000004320.3	2198	1999.77	45110	609.094	ENSRNOG00000003217.3	Lgals3bp	galectin 3 binding protein [Source:RGD Symbol;Acc:620837]
ENSRNOT00000021091.6	390	198.854	4456	605.066	ENSRNOG00000015703.6	Hypk	Huntingtin interacting protein K [Source:RGD Symbol;Acc:1311457]
ENSRNOT00000003075.7	1134	935.767	20860	601.919	ENSRNOG00000022256.6	Cxcl10	C-X-C motif chemokine ligand 10 [Source:RGD Symbol;Acc:620209]
ENSRNOT00000015325.6	906	707.767	15695.6	598.795	ENSRNOG00000011175.8	Hnrnpa2b1	heterogeneous nuclear ribonucleoprotein A2/B1 [Source:RGD Symbol;Acc:1310403]
ENSRNOT00000022828.7	980	781.767	17286	597.047	ENSRNOG00000016781.7	Ppib	peptidylprolyl isomerase B [Source:RGD Symbol;Acc:620312]
ENSRNOT00000086986.1	2661	2462.77	54244.5	594.735	ENSRNOG00000019834.6	Hsp90ab1	heat shock protein 90 alpha family class B member 1 [Source:RGD Symbol;Acc:1303075]
ENSRNOT00000001417.5	2078	1879.77	41250.9	592.544	ENSRNOG00000001068.7	Rac1	Rac family small GTPase 1 [Source:RGD Symbol;Acc:619755]
ENSRNOT00000055302.3	1465	1266.77	27775.4	592.045	ENSRNOG00000036852.3	Pcbp2	poly(rC) binding protein 2 [Source:RGD Symbol;Acc:1309626]
ENSRNOT00000091906.1	787	588.767	12849.2	589.283	ENSRNOG00000059900.1	Bst2	bone marrow stromal cell antigen 2 [Source:RGD Symbol;Acc:727849]
ENSRNOT00000022892.5	1853	1654.77	35927	586.24	ENSRNOG00000017032.5	Atp5f1a	ATP synthase F1 subunit alpha [Source:RGD Symbol;Acc:619993]
ENSRNOT00000070897.1	2121	1922.77	41729	586.007	ENSRNOG00000050655.1	P4ha1	prolyl 4-hydroxylase subunit alpha 1 [Source:RGD Symbol;Acc:621000]
ENSRNOT00000086310.1	2758	2559.77	55486.2	585.296	ENSRNOG00000059714.1	Hsp90aa1	heat shock protein 90 alpha family class A member 1 [Source:RGD Symbol;Acc:631409]
ENSRNOT00000023567.8	1758	1559.77	33774.3	584.679	ENSRNOG00000017441.8	Tpm3	tropomyosin 3 [Source:RGD Symbol;Acc:621546]
ENSRNOT00000017301.4	300	122.512	2650	584.063	ENSRNOG00000012748.4	Vamp8	vesicle-associated membrane protein 8 [Source:RGD Symbol;Acc:620421]
ENSRNOT00000022256.4	333	149.184	3212	581.357	ENSRNOG00000016561.4	Pclaf	PCNA clamp associated factor [Source:RGD Symbol;Acc:1303041]
ENSRNOT00000032613.4	2014	1815.77	38993	579.853	ENSRNOG00000023150.5	Gpi	glucose-6-phosphate isomerase [Source:RGD Symbol;Acc:2727]
ENSRNOT00000003611.3	746	547.785	11755	579.433	ENSRNOG00000002671.3	Nme2	NME/NM23 nucleoside diphosphate kinase 2 [Source:RGD Symbol;Acc:619877]
ENSRNOT00000034712.4	198	52.2488	1116.65	577.075	ENSRNOG00000025388.5	Mrpl33	mitochondrial ribosomal protein L33 [Source:RGD Symbol;Acc:2322809]
ENSRNOT00000080218.1	2386	2187.77	46738.7	576.855	ENSRNOG00000008639.7	Pabpc1	poly(A) binding protein, cytoplasmic 1 [Source:RGD Symbol;Acc:619838]
ENSRNOT00000002885.6	656	457.837	9732	573.961	ENSRNOG00000002115.6	Sod1	superoxide dismutase 1 [Source:RGD Symbol;Acc:3731]
ENSRNOT00000000072.2	289	114.025	2405	569.514	ENSRNOG00000000064.4	Atp5me	ATP synthase membrane subunit e [Source:RGD Symbol;Acc:621377]
ENSRNOT00000049683.3	784	585.767	12164	560.716	ENSRNOG00000030700.3	Mt-co3	mitochondrially encoded cytochrome c oxidase III [Source:RGD Symbol;Acc:621873]
ENSRNOT00000041033.4	1388	1189.77	24703	560.633	ENSRNOG00000033765.4	Eif1	eukaryotic translation initiation factor 1 [Source:RGD Symbol;Acc:1306308]
ENSRNOT00000074617.2	862	663.767	13705.8	557.544	ENSRNOG00000048109.2	LOC100365839	40S ribosomal protein S3a-like [Source:RGD Symbol;Acc:2318248]
ENSRNOT00000008728.5	2329	2130.77	43162	546.961	ENSRNOG00000006228.5	Pdia4	protein disulfide isomerase family A, member 4 [Source:RGD Symbol;Acc:619835]
ENSRNOT00000010759.6	1865	1666.77	33663.3	545.347	ENSRNOG00000008140.6	Rpl15	ribosomal protein L15 [Source:RGD Symbol;Acc:621181]
ENSRNOT00000049048.1	1770	1571.77	31735.5	545.19	ENSRNOG00000030628.2	Eif4a1	eukaryotic translation initiation factor 4A1 [Source:RGD Symbol;Acc:735141]
ENSRNOT00000014785.5	3658	3459.77	69756	544.41	ENSRNOG00000010966.6	Itgb1	integrin subunit beta 1 [Source:RGD Symbol;Acc:2927]
ENSRNOT00000007794.6	1686	1487.77	29823	541.262	ENSRNOG00000005924.6	Dstn	destrin, actin depolymerizing factor [Source:RGD Symbol;Acc:1588366]
ENSRNOT00000022550.6	2203	2004.77	40148.1	540.745	ENSRNOG00000016592.6	Gnai2	G protein subunit alpha i2 [Source:RGD Symbol;Acc:620243]
ENSRNOT00000049001.3	995	796.767	15955.5	540.718	ENSRNOG00000032401.3	H3f3c	H3 histone family member 3C [Source:RGD Symbol;Acc:2321290]
ENSRNOT00000046201.3	204	55.888	1106	534.352	ENSRNOG00000033299.3	Mt-atp8	mitochondrially encoded ATP synthase 8 [Source:RGD Symbol;Acc:621240]
ENSRNOT00000083843.1	2144	1945.77	38368.5	532.445	ENSRNOG00000014562.6	Hnrnpf	heterogeneous nuclear ribonucleoprotein F [Source:RGD Symbol;Acc:620366]
ENSRNOT00000024712.5	2582	2383.77	46934.7	531.645	ENSRNOG00000018273.7	Ncl	nucleolin [Source:RGD Symbol;Acc:3153]
ENSRNOT00000014807.6	1069	870.767	17070	529.325	ENSRNOG00000010977.6	Igfbp6	insulin-like growth factor binding protein 6 [Source:RGD Symbol;Acc:2877]
ENSRNOT00000001816.6	1876	1677.77	32838	528.489	ENSRNOG00000001344.7	Aldh2	aldehyde dehydrogenase 2 family member [Source:RGD Symbol;Acc:69219]
ENSRNOT00000068683.3	2481	2282.77	44663	528.296	ENSRNOG00000031743.5	Gbp2	guanylate binding protein 2 [Source:RGD Symbol;Acc:621810]
ENSRNOT00000079251.1	698	499.821	9746.95	526.557	ENSRNOG00000059837.1	Cdkn2a	cyclin-dependent kinase inhibitor 2A [Source:RGD Symbol;Acc:2323]
ENSRNOT00000089759.1	1554	1355.77	26343.4	524.66	ENSRNOG00000055319.1	Mrfap1	Morf4 family associated protein 1 [Source:RGD Symbol;Acc:628631]
ENSRNOT00000042614.2	418	224.638	4314.97	518.663	ENSRNOG00000031127.2	Snrpe	small nuclear ribonucleoprotein polypeptide E [Source:RGD Symbol;Acc:2321675]
ENSRNOT00000047553.4	642	443.896	8509.84	517.644	ENSRNOG00000034130.4	LOC108349189	high mobility group protein B1 pseudogene [Source:RGD Symbol;Acc:11468204]
ENSRNOT00000058436.3	805	606.767	11575	515.097	ENSRNOG00000038375.3	AABR07026311.1
ENSRNOT00000025525.4	600	401.968	7657.88	514.408	ENSRNOG00000018816.4	Cox5a	cytochrome c oxidase subunit 5A [Source:RGD Symbol;Acc:620607]
ENSRNOT00000025887.5	1000	801.767	15250.7	513.609	ENSRNOG00000019041.6	Psme1	proteasome activator subunit 1 [Source:RGD Symbol;Acc:3429]
ENSRNOT00000071796.2	589	391.047	7432.15	513.188	ENSRNOG00000049229.2	Pomp	proteasome maturation protein [Source:RGD Symbol;Acc:1305831]
ENSRNOT00000047593.5	2048	1849.77	35084.5	512.141	ENSRNOG00000034093.4	AABR07011951.1
ENSRNOT00000055285.4	1234	1035.77	19635.2	511.876	ENSRNOG00000036839.4	Hnrnpa1	heterogeneous nuclear ribonucleoprotein A1 [Source:RGD Symbol;Acc:69234]
ENSRNOT00000020216.3	663	464.837	8811.54	511.85	ENSRNOG00000014936.3	Ifitm2	interferon induced transmembrane protein 2 [Source:RGD Symbol;Acc:69332]
ENSRNOT00000003247.5	1809	1610.77	30501	511.296	ENSRNOG00000002389.5	Morf4l2	mortality factor 4 like 2 [Source:RGD Symbol;Acc:1359471]
ENSRNOT00000058234.3	726	527.804	9933	508.158	ENSRNOG00000001596.7	Atp5mc3	ATP synthase membrane subunit c locus 3 [Source:RGD Symbol;Acc:620052]
ENSRNOT00000074685.2	565	367.174	6894.97	507.051	ENSRNOG00000046889.3	Dbi	diazepam binding inhibitor, acyl-CoA binding protein [Source:RGD Symbol;Acc:2490]
ENSRNOT00000054957.2	1880	1681.77	31573	506.922	ENSRNOG00000036688.2	Arhgdia	Rho GDP dissociation inhibitor alpha [Source:RGD Symbol;Acc:1359547]
ENSRNOT00000041789.2	1511	1312.77	24522	504.382	ENSRNOG00000016638.5	Gnb1	G protein subunit beta 1 [Source:RGD Symbol;Acc:2718]
ENSRNOT00000064679.2	1449	1250.77	23332	503.694	ENSRNOG00000004060.7	Calm1	calmodulin 1 [Source:RGD Symbol;Acc:2257]
ENSRNOT00000075493.2	723	524.804	9782	503.294	ENSRNOG00000049075.2	Fabp5	fatty acid binding protein 5 [Source:RGD Symbol;Acc:70997]
ENSRNOT00000076021.1	389	197.935	3674	501.196	ENSRNOG00000000996.7	Arpc1a	actin related protein 2/3 complex, subunit 1A [Source:RGD Symbol;Acc:620834]
ENSRNOT00000027980.7	472	275.844	5116.85	500.877	ENSRNOG00000020602.7	Ndufa13	NADH:ubiquinone oxidoreductase subunit A13 [Source:RGD Symbol;Acc:6492821]
ENSRNOT00000018074.6	1221	1022.77	18899	498.946	ENSRNOG00000013452.6	Rcn1	reticulocalbin 1 [Source:RGD Symbol;Acc:1311292]
ENSRNOT00000087928.1	1340	1141.77	20843.4	492.926	ENSRNOG00000052802.1	Aldoa	aldolase, fructose-bisphosphate A [Source:RGD Symbol;Acc:2089]
ENSRNOT00000005786.6	1258	1059.77	19215	489.577	ENSRNOG00000004252.6	LOC108348062	eukaryotic translation initiation factor 3 subunit H [Source:RGD Symbol;Acc:11498408]
ENSRNOT00000050204.4	932	733.767	13296.9	489.309	ENSRNOG00000031889.4	AABR07065438.1	ribosomal protein L6, pseudo 1 [Source:NCBI gene;Acc:500714]
ENSRNOT00000033450.3	1533	1334.77	24184.2	489.236	ENSRNOG00000021438.3	Tuba1c	tubulin, alpha 1C [Source:RGD Symbol;Acc:1307226]
ENSRNOT00000031555.5	879	680.767	12317	488.537	ENSRNOG00000023546.5	Hspb1	heat shock protein family B (small) member 1 [Source:RGD Symbol;Acc:61306]
ENSRNOT00000028793.6	2757	2558.77	46126	486.75	ENSRNOG00000021201.7	Txnip	thioredoxin interacting protein [Source:RGD Symbol;Acc:620886]
ENSRNOT00000067875.4	1467	1268.77	22525.2	479.377	ENSRNOG00000043451.4	Spp1	secreted phosphoprotein 1 [Source:RGD Symbol;Acc:3752]
ENSRNOT00000037608.4	1170	971.767	17174	477.2	ENSRNOG00000021808.4	Tecr	trans-2,3-enoyl-CoA reductase [Source:RGD Symbol;Acc:620376]
ENSRNOT00000008356.5	3210	3011.77	53184.9	476.824	ENSRNOG00000006197.7	Calu	calumenin [Source:RGD Symbol;Acc:620383]
ENSRNOT00000009333.6	1263	1064.77	18765.5	475.879	ENSRNOG00000007091.8	Ly6e	lymphocyte antigen 6 family member E [Source:RGD Symbol;Acc:1565342]
ENSRNOT00000037639.6	1189	990.767	17428	474.971	ENSRNOG00000023686.6	Upk3b	uroplakin 3B [Source:RGD Symbol;Acc:1309615]
ENSRNOT00000022487.5	484	287.467	5045	473.876	ENSRNOG00000016660.5	Cox5b	cytochrome c oxidase subunit 5B [Source:RGD Symbol;Acc:620608]
ENSRNOT00000011494.4	1347	1148.77	20135.4	473.281	ENSRNOG00000008289.7	Slc25a3	solute carrier family 25 member 3 [Source:RGD Symbol;Acc:70986]
ENSRNOT00000023664.6	1415	1216.77	21318	473.075	ENSRNOG00000017469.6	Anxa1	annexin A1 [Source:RGD Symbol;Acc:2118]
ENSRNOT00000033056.5	1592	1393.77	24334.2	471.431	ENSRNOG00000003645.8	Hnrnpab	heterogeneous nuclear ribonucleoprotein A/B [Source:RGD Symbol;Acc:69255]
ENSRNOT00000064535.2	4988	4789.77	83159	468.798	ENSRNOG00000017158.6	Eif4g2	eukaryotic translation initiation factor 4, gamma 2 [Source:RGD Symbol;Acc:1305294]
ENSRNOT00000088391.1	5349	5150.77	89241.6	467.828	ENSRNOG00000058898.1	Nedd4	NEDD4 E3 ubiquitin protein ligase [Source:RGD Symbol;Acc:3157]
ENSRNOT00000046108.3	681	482.821	8347	466.805	ENSRNOG00000031979.3	Mt-atp6	mitochondrially encoded ATP synthase 6 [Source:RGD Symbol;Acc:621239]
ENSRNOT00000005286.7	2105	1906.77	32863.9	465.385	ENSRNOG00000003890.7	Nap1l1	nucleosome assembly protein 1-like 1 [Source:RGD Symbol;Acc:71094]
ENSRNOT00000029829.4	1899	1700.77	29142	462.664	ENSRNOG00000021828.4	Coro1b	coronin 1B [Source:RGD Symbol;Acc:2382]
ENSRNOT00000061231.4	903	704.767	12069	462.399	ENSRNOG00000039876.4	LOC681410	heterogeneous nuclear ribonucleoprotein A0 [Source:MGI Symbol;Acc:MGI:1924384]
ENSRNOT00000068435.3	1172	973.767	16660	461.966	ENSRNOG00000029682.5	Clic1	chloride intracellular channel 1 [Source:RGD Symbol;Acc:1303043]
ENSRNOT00000093233.1	741	542.785	9258.94	460.6	ENSRNOG00000002052.6	Ccdc80	coiled-coil domain containing 80 [Source:RGD Symbol;Acc:69421]
ENSRNOT00000086293.1	847	648.767	11038.9	459.439	ENSRNOG00000047706.3	LOC103690108	class I histocompatibility antigen, Non-RT1.A alpha-1 chain-like [Source:RGD Symbol;Acc:9113230]
ENSRNOT00000016423.6	4464	4265.77	72282.3	457.537	ENSRNOG00000011292.6	NEWGENE_621351	collagen, type I, alpha 2 [Source:RGD Symbol;Acc:9452897]
ENSRNOT00000001958.4	1319	1120.77	18946	456.45	ENSRNOG00000001440.4	Mdh2	malate dehydrogenase 2 [Source:RGD Symbol;Acc:619719]
ENSRNOT00000028687.3	816	617.767	10442	456.405	ENSRNOG00000021125.8	Prdx5	peroxiredoxin 5 [Source:RGD Symbol;Acc:71007]
ENSRNOT00000050213.3	1499	1300.77	21948.7	455.618	ENSRNOG00000032902.3	Ybx1-ps3	Y box protein 1 related, pseudogene 3 [Source:RGD Symbol;Acc:1590933]
ENSRNOT00000083666.1	1470	1271.77	21452.2	455.466	ENSRNOG00000011329.7	Pkm	pyruvate kinase M1/2 [Source:RGD Symbol;Acc:3337]
ENSRNOT00000000580.4	324	141.697	2381	453.721	ENSRNOG00000000488.4	Hmga1	high mobility group AT-hook 1 [Source:RGD Symbol;Acc:628699]
ENSRNOT00000076181.1	3801	3602.77	60472.5	453.224	ENSRNOG00000030118.7	Msn	moesin [Source:RGD Symbol;Acc:621260]
ENSRNOT00000051207.3	849	650.767	10919.2	453.063	ENSRNOG00000031244.3	LOC108349606	60S ribosomal protein L7a-like [Source:RGD Symbol;Acc:11408721]
ENSRNOT00000001438.7	1791	1592.77	26717	452.925	ENSRNOG00000001083.7	Kdelr2	KDEL endoplasmic reticulum protein retention receptor 2 [Source:RGD Symbol;Acc:1304618]
ENSRNOT00000048490.2	2380	2181.77	36569	452.58	ENSRNOG00000030680.4	Ddx5	DEAD-box helicase 5 [Source:RGD Symbol;Acc:619906]
ENSRNOT00000048198.5	493	296.194	4962.32	452.376	ENSRNOG00000031022.5	LOC108348287	60S ribosomal protein L36a [Source:RGD Symbol;Acc:11421250]
ENSRNOT00000003219.3	2016	1817.77	30407	451.675	ENSRNOG00000002358.5	Scpep1	serine carboxypeptidase 1 [Source:RGD Symbol;Acc:620067]
ENSRNOT00000011316.6	324	141.697	2363	450.291	ENSRNOG00000008461.6	Smdt1	single-pass membrane protein with aspartate-rich tail 1 [Source:RGD Symbol;Acc:1311310]
ENSRNOT00000056704.3	3672	3473.77	57907.2	450.115	ENSRNOG00000030183.5	Plod2	procollagen lysine, 2-oxoglutarate 5-dioxygenase 2 [Source:RGD Symbol;Acc:3353]
ENSRNOT00000043230.5	646	447.852	7398.26	446.053	ENSRNOG00000002255.8	Fam162a	family with sequence similarity 162, member A [Source:RGD Symbol;Acc:1590883]
ENSRNOT00000082151.1	3513	3314.77	54730	445.824	ENSRNOG00000018404.7	Aars	alanyl-tRNA synthetase [Source:RGD Symbol;Acc:1304832]
ENSRNOT00000010117.5	549	351.293	5793.85	445.337	ENSRNOG00000007407.6	Ndufa12	NADH:ubiquinone oxidoreductase subunit A12 [Source:RGD Symbol;Acc:1311462]
ENSRNOT00000023037.5	1755	1556.77	25659	445.048	ENSRNOG00000016271.5	Itm2b	integral membrane protein 2B [Source:RGD Symbol;Acc:620727]
ENSRNOT00000070925.2	2074	1875.77	30623	440.819	ENSRNOG00000047276.2	AABR07044711.1	M2 pyruvate kinase-like [Source:NCBI gene;Acc:100362738]
ENSRNOT00000079469.1	234	74.8182	1213	437.769	ENSRNOG00000057601.1	AABR07044080.2
ENSRNOT00000031891.4	1814	1615.77	26078.5	435.807	ENSRNOG00000023360.4	Fus	FUS RNA binding protein [Source:RGD Symbol;Acc:1308864]
ENSRNOT00000025495.7	306	127.175	2051.04	435.474	ENSRNOG00000018775.7	Cystm1	cysteine-rich transmembrane module containing 1 [Source:RGD Symbol;Acc:2323233]
ENSRNOT00000092713.1	274	102.833	1657.92	435.332	ENSRNOG00000062039.1	AABR07044420.2
ENSRNOT00000019554.6	1543	1344.77	21664	434.994	ENSRNOG00000014453.6	Anxa5	annexin A5 [Source:RGD Symbol;Acc:2120]
ENSRNOT00000030857.5	186	45.5044	732.626	434.73	ENSRNOG00000047922.2	AABR07046628.1
ENSRNOT00000006859.5	930	731.767	11753.7	433.705	ENSRNOG00000005116.5	LOC108353446	40S ribosomal protein S2 pseudogene [Source:RGD Symbol;Acc:11481307]
ENSRNOT00000015828.7	1717	1518.77	24384.3	433.521	ENSRNOG00000011814.7	Cbx3	chromobox 3 [Source:RGD Symbol;Acc:1549705]
ENSRNOT00000081787.1	870	671.767	10741.7	431.761	ENSRNOG00000025892.6	Set	SET nuclear proto-oncogene [Source:RGD Symbol;Acc:1307467]
ENSRNOT00000064180.3	543	345.316	5514	431.162	ENSRNOG00000014405.7	Aprt	adenine phosphoribosyl transferase [Source:RGD Symbol;Acc:1307758]
ENSRNOT00000037611.5	6306	6107.77	97416.6	430.667	ENSRNOG00000049236.2	Myh9l1	myosin heavy chain 9-like 1 [Source:RGD Symbol;Acc:6492022]
ENSRNOT00000025888.7	405	212.751	3390.79	430.348	ENSRNOG00000019106.7	Rps17	ribosomal protein S17 [Source:RGD Symbol;Acc:62027]
ENSRNOT00000045401.4	434	239.659	3799.66	428.098	ENSRNOG00000039249.3	AABR07035539.1	ribosomal protein L31-like 4 [Source:NCBI gene;Acc:100361974]
ENSRNOT00000001794.7	2433	2234.77	35398	427.698	ENSRNOG00000001316.7	Anapc5	anaphase-promoting complex subunit 5 [Source:RGD Symbol;Acc:1306125]
ENSRNOT00000057158.3	464	268.135	4236.33	426.607	ENSRNOG00000037673.3	AABR07071891.1
ENSRNOT00000024253.5	2002	1803.77	28330.3	424.093	ENSRNOG00000017510.8	Mfge8	milk fat globule-EGF factor 8 protein [Source:RGD Symbol;Acc:3083]
ENSRNOT00000022377.5	216	63.2405	992	423.552	ENSRNOG00000016686.6	Tmem167a	transmembrane protein 167A [Source:RGD Symbol;Acc:2323318]
ENSRNOT00000013863.5	1647	1448.77	22598.6	421.186	ENSRNOG00000010170.5	Tubb4b	tubulin, beta 4B class IVb [Source:RGD Symbol;Acc:735101]
ENSRNOT00000013884.6	1642	1443.77	22470	420.24	ENSRNOG00000010239.6	Cnbp	CCHC-type zinc finger, nucleic acid binding protein [Source:RGD Symbol;Acc:621807]
ENSRNOT00000073688.2	570	372.161	5783.84	419.639	ENSRNOG00000048342.2	Tbca	tubulin folding cofactor A [Source:RGD Symbol;Acc:1311538]
ENSRNOT00000043693.3	684	485.821	7548	419.514	ENSRNOG00000030371.3	Mt-co2	mitochondrially encoded cytochrome c oxidase II [Source:RGD Symbol;Acc:621872]
ENSRNOT00000005073.7	4482	4283.77	66272	417.73	ENSRNOG00000003736.7	Col5a2	collagen type V alpha 2 chain [Source:RGD Symbol;Acc:70921]
ENSRNOT00000005909.6	1165	966.767	14854	414.871	ENSRNOG00000004411.6	Tspan8	tetraspanin 8 [Source:RGD Symbol;Acc:621783]
ENSRNOT00000077687.1	1098	899.767	13772.5	413.308	ENSRNOG00000036852.3	Pcbp2	poly(rC) binding protein 2 [Source:RGD Symbol;Acc:1309626]
ENSRNOT00000042827.5	342	156.866	2400	413.119	ENSRNOG00000002280.6	Sh3bgrl	SH3 domain binding glutamate-rich protein like [Source:RGD Symbol;Acc:1560520]
ENSRNOT00000026580.6	2349	2150.77	32879.8	412.788	ENSRNOG00000019629.7	Lamp1	lysosomal-associated membrane protein 1 [Source:RGD Symbol;Acc:2989]
ENSRNOT00000027123.6	1007	808.767	12342.9	412.085	ENSRNOG00000019940.6	Ssr2	signal sequence receptor subunit 2 [Source:RGD Symbol;Acc:1308365]
ENSRNOT00000092558.1	545	347.305	5284.73	410.869	ENSRNOG00000001068.7	Rac1	Rac family small GTPase 1 [Source:RGD Symbol;Acc:619755]
ENSRNOT00000006804.5	1154	955.767	14505	409.786	ENSRNOG00000005041.5	Crip2	cysteine-rich protein 2 [Source:RGD Symbol;Acc:1302959]
ENSRNOT00000033907.5	465	269.072	4059.75	407.401	ENSRNOG00000000490.7	Rps10	ribosomal protein S10 [Source:RGD Symbol;Acc:621024]
ENSRNOT00000014704.4	1290	1091.77	16450	406.843	ENSRNOG00000010830.4	Slc25a4	solute carrier family 25 member 4 [Source:RGD Symbol;Acc:620352]
ENSRNOT00000028084.5	2611	2412.77	36032	403.24	ENSRNOG00000020684.5	Vat1	vesicle amine transport 1 [Source:RGD Symbol;Acc:1308943]
ENSRNOT00000025925.3	1662	1463.77	21854.9	403.151	ENSRNOG00000019070.4	St13	ST13, Hsp70 interacting protein [Source:RGD Symbol;Acc:621312]
ENSRNOT00000064418.2	505	307.942	4587	402.208	ENSRNOG00000042696.2	Micos10	mitochondrial contact site and cristae organizing system subunit 10 [Source:RGD Symbol;Acc:1560187]
ENSRNOT00000001319.7	1105	906.767	13471	401.139	ENSRNOG00000000996.7	Arpc1a	actin related protein 2/3 complex, subunit 1A [Source:RGD Symbol;Acc:620834]
ENSRNOT00000022231.6	3261	3062.77	45394	400.199	ENSRNOG00000016316.6	Mcm2	minichromosome maintenance complex component 2 [Source:RGD Symbol;Acc:1305577]
ENSRNOT00000004836.6	794	595.767	8806.89	399.151	ENSRNOG00000003626.6	Atp5pd	ATP synthase peripheral stalk subunit d [Source:RGD Symbol;Acc:620083]
ENSRNOT00000002579.5	1052	853.767	12610	398.811	ENSRNOG00000001884.5	Ranbp1	RAN binding protein 1 [Source:RGD Symbol;Acc:1310521]
ENSRNOT00000028188.7	4236	4037.77	59145	395.519	ENSRNOG00000020715.7	Ddb1	damage-specific DNA binding protein 1 [Source:RGD Symbol;Acc:621889]
ENSRNOT00000026633.7	1221	1022.77	14963	395.033	ENSRNOG00000019556.7	Cd9	CD9 molecule [Source:RGD Symbol;Acc:2318]
ENSRNOT00000009152.5	602	403.968	5900.99	394.429	ENSRNOG00000006762.5	Snu13	small nuclear ribonucleoprotein 13 [Source:RGD Symbol;Acc:1303103]
ENSRNOT00000050302.4	1013	814.767	11849	392.681	ENSRNOG00000034198.4	Tceal9	transcription elongation factor A like 9 [Source:RGD Symbol;Acc:1592975]
ENSRNOT00000026696.6	2834	2635.77	38312	392.481	ENSRNOG00000019525.6	Hspa9	heat shock protein family A (Hsp70) member 9 [Source:RGD Symbol;Acc:1311806]
ENSRNOT00000030558.5	685	486.821	7052	391.142	ENSRNOG00000022860.5	Swi5	SWI5 homologous recombination repair protein [Source:RGD Symbol;Acc:1559966]
ENSRNOT00000007676.7	1214	1015.77	14688.7	390.464	ENSRNOG00000005828.7	Skp1	S-phase kinase-associated protein 1 [Source:RGD Symbol;Acc:1359648]
ENSRNOT00000030761.4	1269	1070.77	15483.7	390.454	ENSRNOG00000023385.5	Rpl37a	ribosomal protein L37a [Source:RGD Symbol;Acc:2319947]
ENSRNOT00000038691.5	348	162.01	2339.79	389.966	ENSRNOG00000002116.6	Rplp2	ribosomal protein lateral stalk subunit P2 [Source:RGD Symbol;Acc:621775]
ENSRNOT00000057030.2	348	162.01	2339.79	389.966	ENSRNOG00000037607.2	LOC100911575	60S acidic ribosomal protein P2-like [Source:RGD Symbol;Acc:6491911]
ENSRNOT00000032026.3	601	402.968	5774.77	386.95	ENSRNOG00000024309.4	Cox6b1	cytochrome c oxidase subunit 6B1 [Source:RGD Symbol;Acc:1584097]
ENSRNOT00000011508.6	1074	875.767	12509	385.678	ENSRNOG00000008163.6	Atp6v1g1	ATPase H+ transporting V1 subunit G1 [Source:RGD Symbol;Acc:1310088]
ENSRNOT00000045256.3	1067	868.767	12351.2	383.882	ENSRNOG00000039496.2	Plp2	proteolipid protein 2 [Source:RGD Symbol;Acc:1587363]
ENSRNOT00000025980.7	2000	1801.77	25554.1	382.959	ENSRNOG00000019113.7	Hnrnpk	heterogeneous nuclear ribonucleoprotein K [Source:RGD Symbol;Acc:71058]
ENSRNOT00000048554.5	1617	1418.77	20119.9	382.918	ENSRNOG00000025274.6	Hexb	hexosaminidase subunit beta [Source:RGD Symbol;Acc:1307607]
ENSRNOT00000000772.7	590	392.047	5525.83	380.584	ENSRNOG00000000622.7	Hint1	histidine triad nucleotide binding protein 1 [Source:RGD Symbol;Acc:1593411]
ENSRNOT00000022196.5	685	486.821	6852	380.049	ENSRNOG00000016272.5	Edf1	endothelial differentiation-related factor 1 [Source:RGD Symbol;Acc:1308073]
ENSRNOT00000001820.4	1173	974.767	13665	378.53	ENSRNOG00000001346.4	Cops6	COP9 signalosome subunit 6 [Source:RGD Symbol;Acc:1309919]
ENSRNOT00000009737.3	643	444.896	6232.99	378.293	ENSRNOG00000007392.3	Atp6v1f	ATPase H+ transporting V1 subunit F [Source:RGD Symbol;Acc:621552]
ENSRNOT00000044477.3	3344	3145.77	44032.9	377.957	ENSRNOG00000033790.4	Hnrnpu	heterogeneous nuclear ribonucleoprotein U [Source:RGD Symbol;Acc:620372]
ENSRNOT00000028743.7	2101	1902.77	26618	377.73	ENSRNOG00000021164.7	Stip1	stress-induced phosphoprotein 1 [Source:RGD Symbol;Acc:621599]
ENSRNOT00000001924.8	459	263.349	3673.35	376.636	ENSRNOG00000001420.8	Fis1	fission, mitochondrial 1 [Source:RGD Symbol;Acc:1306668]
ENSRNOT00000027917.7	1418	1219.77	17005.1	376.438	ENSRNOG00000043007.3	Rcn3	reticulocalbin 3 [Source:RGD Symbol;Acc:1359365]
ENSRNOT00000004911.5	2411	2212.77	30573.5	373.079	ENSRNOG00000003689.6	Nono	non-POU domain containing, octamer-binding [Source:RGD Symbol;Acc:1549738]
ENSRNOT00000037043.3	461	265.314	3650.94	371.566	ENSRNOG00000028690.3	LOC100362366	40S ribosomal protein S17-like [Source:RGD Symbol;Acc:2318320]
ENSRNOT00000022367.3	416	222.813	3061.47	371.007	ENSRNOG00000016507.3	LOC687679	similar to small nuclear ribonucleoprotein polypeptide G [Source:RGD Symbol;Acc:1583028]
ENSRNOT00000091288.1	276	104.274	1428	369.778	ENSRNOG00000060293.1	Ndufa3	NADH:ubiquinone oxidoreductase subunit A3 [Source:RGD Symbol;Acc:1588687]
ENSRNOT00000004290.4	1661	1462.77	20026	369.667	ENSRNOG00000003148.5	Timp2	TIMP metallopeptidase inhibitor 2 [Source:RGD Symbol;Acc:61312]
ENSRNOT00000026279.7	1338	1139.77	15527.9	367.865	ENSRNOG00000019246.7	Psme2	proteasome activator subunit 2 [Source:RGD Symbol;Acc:3430]
ENSRNOT00000066589.2	2227	2028.77	27593	367.247	ENSRNOG00000014525.5	Hspd1	heat shock protein family D (Hsp60) member 1 [Source:RGD Symbol;Acc:621314]
ENSRNOT00000003787.7	1659	1460.77	19863.7	367.173	ENSRNOG00000002642.7	Ptges3	prostaglandin E synthase 3 [Source:RGD Symbol;Acc:1561913]
ENSRNOT00000002695.5	2553	2354.77	32006.3	367.01	ENSRNOG00000001963.7	Mx2	MX dynamin like GTPase 2 [Source:RGD Symbol;Acc:628821]
ENSRNOT00000074226.3	4520	4321.77	58703.4	366.769	ENSRNOG00000014426.7	Lox	lysyl oxidase [Source:RGD Symbol;Acc:3015]
ENSRNOT00000022603.5	1112	913.767	12407	366.625	ENSRNOG00000016770.5	Calm2	calmodulin 2 [Source:RGD Symbol;Acc:2258]
ENSRNOT00000015579.6	1990	1791.77	24040	362.28	ENSRNOG00000011559.7	Cnn3	calponin 3 [Source:RGD Symbol;Acc:71044]
ENSRNOT00000010061.3	1610	1411.77	18936	362.173	ENSRNOG00000007029.3	Dnaja1	DnaJ heat shock protein family (Hsp40) member A1 [Source:RGD Symbol;Acc:620942]
ENSRNOT00000037946.5	1992	1793.77	24049	362.011	ENSRNOG00000021317.5	Cct2	chaperonin containing TCP1 subunit 2 [Source:RGD Symbol;Acc:1359143]
ENSRNOT00000090007.1	478	281.657	3774	361.803	ENSRNOG00000054689.1	Cox7b	cytochrome c oxidase subunit 7B [Source:RGD Symbol;Acc:727789]
ENSRNOT00000049000.6	1098	899.767	12031.5	361.061	ENSRNOG00000016731.8	Tpm2	tropomyosin 2 [Source:RGD Symbol;Acc:1559479]
ENSRNOT00000067391.1	382	191.663	2552.76	359.635	ENSRNOG00000043098.1	Mt2A	metallothionein 2A [Source:RGD Symbol;Acc:1592345]
ENSRNOT00000023786.5	1434	1235.77	16442	359.26	ENSRNOG00000017447.5	Eif2s2	eukaryotic translation initiation factor 2 subunit beta [Source:RGD Symbol;Acc:735192]
ENSRNOT00000001419.5	1226	1027.77	13636	358.248	ENSRNOG00000001070.5	Cdk2ap1	cyclin-dependent kinase 2 associated protein 1 [Source:RGD Symbol;Acc:1308664]
ENSRNOT00000028390.5	2435	2236.77	29611	357.457	ENSRNOG00000020889.7	Nucb1	nucleobindin 1 [Source:RGD Symbol;Acc:620030]
ENSRNOT00000074446.2	756	557.785	7381.99	357.353	ENSRNOG00000050563.2	Sub1	SUB1 regulator of transcription [Source:RGD Symbol;Acc:621582]
ENSRNOT00000015886.6	1744	1545.77	20456	357.329	ENSRNOG00000011632.6	Cct5	chaperonin containing TCP1 subunit 5 [Source:RGD Symbol;Acc:735161]
ENSRNOT00000028179.4	519	321.627	4254.21	357.156	ENSRNOG00000020771.4	Sap18	Sin3A associated protein 18 [Source:RGD Symbol;Acc:1310388]
ENSRNOT00000018723.6	1399	1200.77	15840	356.195	ENSRNOG00000013961.6	Ghitm	growth hormone inducible transmembrane protein [Source:RGD Symbol;Acc:1359301]
ENSRNOT00000025988.4	640	441.896	5825	355.932	ENSRNOG00000019206.4	Nupr1	nuclear protein 1, transcriptional regulator [Source:RGD Symbol;Acc:69363]
ENSRNOT00000024464.4	1154	955.767	12587	355.6	ENSRNOG00000018109.4	Clic4	chloride intracellular channel 4 [Source:RGD Symbol;Acc:61857]
ENSRNOT00000034740.4	1017	818.767	10756	354.716	ENSRNOG00000024186.4	Eef1b2	eukaryotic translation elongation factor 1 beta 2 [Source:RGD Symbol;Acc:1311415]
ENSRNOT00000033015.4	1857	1658.77	21759.6	354.206	ENSRNOG00000020255.6	Sars1	seryl-tRNA synthetase 1 [Source:RGD Symbol;Acc:628813]
ENSRNOT00000039551.6	4363	4164.77	54598.9	353.984	ENSRNOG00000023383.6	Ddx3x	DEAD-box helicase 3, X-linked [Source:RGD Symbol;Acc:1564771]
ENSRNOT00000000783.4	1187	988.767	12947.4	353.574	ENSRNOG00000000632.6	Cdk1	cyclin-dependent kinase 1 [Source:RGD Symbol;Acc:2319]
ENSRNOT00000026783.5	3206	3007.77	39337	353.141	ENSRNOG00000019778.6	Cavin1	caveolae associated protein 1 [Source:RGD Symbol;Acc:1307685]
ENSRNOT00000033733.5	1144	945.767	12351.7	352.641	ENSRNOG00000013508.7	Rpl31	ribosomal protein L31 [Source:RGD Symbol;Acc:621202]
ENSRNOT00000019772.6	8331	8132.77	106197	352.585	ENSRNOG00000014288.8	Fn1	fibronectin 1 [Source:RGD Symbol;Acc:2624]
ENSRNOT00000000177.4	1747	1548.77	20177	351.772	ENSRNOG00000000164.4	Lamp2	lysosomal-associated membrane protein 2 [Source:RGD Symbol;Acc:2990]
ENSRNOT00000012616.7	704	505.821	6588	351.68	ENSRNOG00000009364.7	Ndufb9	NADH:ubiquinone oxidoreductase subunit B9 [Source:RGD Symbol;Acc:1307114]
ENSRNOT00000042547.4	860	661.767	8572.24	349.768	ENSRNOG00000031864.4	AABR07021871.1
ENSRNOT00000026395.3	2183	1984.77	25695	349.567	ENSRNOG00000019445.3	Msln	mesothelin [Source:RGD Symbol;Acc:69333]
ENSRNOT00000018009.6	1975	1776.77	22985	349.305	ENSRNOG00000013360.6	Prkcsh	protein kinase C substrate 80K-H [Source:RGD Symbol;Acc:1309628]
ENSRNOT00000007175.6	785	586.767	7557	347.756	ENSRNOG00000005195.6	Cst3	cystatin C [Source:RGD Symbol;Acc:2432]
ENSRNOT00000020364.6	2276	2077.77	26739.5	347.494	ENSRNOG00000014992.6	M6pr	mannose-6-phosphate receptor, cation dependent [Source:RGD Symbol;Acc:1359355]
ENSRNOT00000023504.6	1973	1774.77	22824	347.249	ENSRNOG00000017414.7	Irf7	interferon regulatory factor 7 [Source:RGD Symbol;Acc:1307828]
ENSRNOT00000021030.5	2486	2287.77	29289.9	345.698	ENSRNOG00000015630.5	Cct7	chaperonin containing TCP1 subunit 7 [Source:RGD Symbol;Acc:1306422]
ENSRNOT00000012608.4	1497	1298.77	16524	343.538	ENSRNOG00000008822.5	Fkbp1a	FKBP prolyl isomerase 1A [Source:RGD Symbol;Acc:2617]
ENSRNOT00000090819.1	585	387.073	4907.6	342.347	ENSRNOG00000058909.1	Rps9	ribosomal protein S9 [Source:RGD Symbol;Acc:619889]
ENSRNOT00000001397.4	1958	1759.77	22289.9	342.015	ENSRNOG00000001053.5	Tmed2	transmembrane p24 trafficking protein 2 [Source:RGD Symbol;Acc:69243]
ENSRNOT00000043610.2	429	234.963	2968.36	341.121	ENSRNOG00000033024.2	AC099453.1
ENSRNOT00000091057.1	2302	2103.77	26369.8	338.454	ENSRNOG00000002746.7	Fstl1	follistatin-like 1 [Source:RGD Symbol;Acc:68955]
ENSRNOT00000001467.7	582	384.099	4812	338.278	ENSRNOG00000001106.7	Denr	density regulated reinitiation and release factor [Source:RGD Symbol;Acc:1584200]
ENSRNOT00000027749.4	463	267.206	3347	338.22	ENSRNOG00000020442.4	Ubl5	ubiquitin-like 5 [Source:RGD Symbol;Acc:1564644]
ENSRNOT00000068497.3	3224	3025.77	37806	337.378	ENSRNOG00000020412.7	Sf3b2	splicing factor 3b, subunit 2 [Source:RGD Symbol;Acc:1307159]
ENSRNOT00000011665.4	558	360.21	4499	337.249	ENSRNOG00000008689.8	Cbx1	chromobox 1 [Source:RGD Symbol;Acc:1310714]
ENSRNOT00000001593.4	640	441.896	5517	337.111	ENSRNOG00000001201.4	Cstb	cystatin B [Source:RGD Symbol;Acc:2435]
ENSRNOT00000036366.6	1067	868.767	10846.3	337.108	ENSRNOG00000014635.8	Clta	clathrin, light chain A [Source:RGD Symbol;Acc:70919]
ENSRNOT00000046874.2	633	434.911	5428.88	337.055	ENSRNOG00000033321.2	Hmgb2l1	high mobility group box 2-like 1 [Source:RGD Symbol;Acc:1564519]
ENSRNOT00000016076.5	1256	1057.77	13179	336.421	ENSRNOG00000012062.5	Npc2	NPC intracellular cholesterol transporter 2 [Source:RGD Symbol;Acc:628756]
ENSRNOT00000049857.4	1073	874.767	10869.1	335.5	ENSRNOG00000006961.7	Snrpb	small nuclear ribonucleoprotein polypeptides B and B1 [Source:RGD Symbol;Acc:621301]
ENSRNOT00000021017.7	1327	1128.77	13994	334.756	ENSRNOG00000015221.7	Eif3f	eukaryotic translation initiation factor 3, subunit F [Source:RGD Symbol;Acc:1306112]
ENSRNOT00000057898.3	389	197.935	2453.65	334.72	ENSRNOG00000038047.3	Mt1	metallothionein 1 [Source:RGD Symbol;Acc:3117]
ENSRNOT00000015956.6	2358	2159.77	26686	333.632	ENSRNOG00000011782.6	Got2	glutamic-oxaloacetic transaminase 2 [Source:RGD Symbol;Acc:2722]
ENSRNOT00000035650.2	3870	3671.77	45287	333.035	ENSRNOG00000019724.6	Ganab	glucosidase II alpha subunit [Source:RGD Symbol;Acc:1309775]
ENSRNOT00000083839.1	410	217.276	2669	331.687	ENSRNOG00000059061.1	Uqcr10	ubiquinol-cytochrome c reductase, complex III subunit X [Source:RGD Symbol;Acc:1595126]
ENSRNOT00000028656.4	729	530.804	6514	331.364	ENSRNOG00000021104.4	Emp3	epithelial membrane protein 3 [Source:RGD Symbol;Acc:621094]
ENSRNOT00000010512.6	1286	1087.77	13308	330.345	ENSRNOG00000007901.6	Tmed10	transmembrane p24 trafficking protein 10 [Source:RGD Symbol;Acc:620970]
ENSRNOT00000019039.7	705	506.821	6195	330.049	ENSRNOG00000014078.7	Ndufb8	NADH:ubiquinone oxidoreductase subunit B8 [Source:RGD Symbol;Acc:1309129]
ENSRNOT00000026651.5	1065	866.767	10594	330.027	ENSRNOG00000019666.7	Ubxn1	UBX domain protein 1 [Source:RGD Symbol;Acc:1309471]
ENSRNOT00000045156.5	366	177.591	2169.99	329.935	ENSRNOG00000033803.5	LOC100360841	ribosomal protein L37-like [Source:RGD Symbol;Acc:2321317]
ENSRNOT00000006209.5	3556	3357.77	41002	329.72	ENSRNOG00000004420.5	Rad21	RAD21 cohesin complex component [Source:RGD Symbol;Acc:1594529]
ENSRNOT00000028695.5	572	374.137	4565	329.459	ENSRNOG00000021132.5	Trmt112	tRNA methyltransferase subunit 11-2 [Source:RGD Symbol;Acc:1309710]
ENSRNOT00000011499.7	902	703.767	8561	328.463	ENSRNOG00000008673.7	Arpc3	actin related protein 2/3 complex, subunit 3 [Source:RGD Symbol;Acc:1311985]
ENSRNOT00000075371.1	750	551.785	6698	327.768	ENSRNOG00000047598.1	Ctdsp2	CTD small phosphatase 2 [Source:RGD Symbol;Acc:2319209]
ENSRNOT00000066014.3	719	520.821	6320.13	327.664	ENSRNOG00000004883.7	Erh	ERH, mRNA splicing and mitosis factor [Source:RGD Symbol;Acc:1595409]
ENSRNOT00000014153.7	2176	1977.77	23979	327.377	ENSRNOG00000010635.7	Igfbp4	insulin-like growth factor binding protein 4 [Source:RGD Symbol;Acc:2875]
ENSRNOT00000028627.4	1441	1242.77	15020	326.341	ENSRNOG00000021082.4	Kdelr1	KDEL endoplasmic reticulum protein retention receptor 1 [Source:RGD Symbol;Acc:1306764]
ENSRNOT00000080520.1	1573	1374.77	16591.4	325.871	ENSRNOG00000020587.6	Efemp2	EGF containing fibulin extracellular matrix protein 2 [Source:RGD Symbol;Acc:1359496]
ENSRNOT00000017692.5	1603	1404.77	16947	325.746	ENSRNOG00000012623.5	Arf4	ADP-ribosylation factor 4 [Source:RGD Symbol;Acc:621275]
ENSRNOT00000084836.1	291	115.588	1394	325.642	ENSRNOG00000059270.1	AC119015.4
ENSRNOT00000016885.5	831	632.767	7617	325.036	ENSRNOG00000012582.5	Eif4ebp1	eukaryotic translation initiation factor 4E binding protein 1 [Source:RGD Symbol;Acc:620259]
ENSRNOT00000027407.4	2022	1823.77	21941	324.847	ENSRNOG00000020206.7	Ctsd	cathepsin D [Source:RGD Symbol;Acc:621511]
ENSRNOT00000073915.2	1021	822.767	9876	324.112	ENSRNOG00000046313.2	Basp1	brain abundant, membrane attached signal protein 1 [Source:RGD Symbol;Acc:621491]
ENSRNOT00000084200.1	138	22.2045	266	323.468	ENSRNOG00000053437.1	AC103090.1
ENSRNOT00000036140.6	1393	1194.77	14273	322.569	ENSRNOG00000021882.6	Tmed9	transmembrane p24 trafficking protein 9 [Source:RGD Symbol;Acc:1307627]
ENSRNOT00000001825.5	2484	2285.77	27213	321.466	ENSRNOG00000001349.5	Mcm7	minichromosome maintenance complex component 7 [Source:RGD Symbol;Acc:1303018]
ENSRNOT00000067228.3	1774	1575.77	18754	321.361	ENSRNOG00000015079.7	Ddost	dolichyl-diphosphooligosaccharide--protein glycosyltransferase non-catalytic subunit [Source:RGD Symbol;Acc:1308970]
ENSRNOT00000077786.1	2099	1900.77	22578	320.736	ENSRNOG00000051650.1	Ywhaq	tyrosine 3-monooxygenase/tryptophan 5-monooxygenase activation protein, theta [Source:RGD Symbol;Acc:3979]
ENSRNOT00000049609.4	994	795.767	9426.2	319.847	ENSRNOG00000032840.4	Sumo4	small ubiquitin-like modifier 4 [Source:RGD Symbol;Acc:1595256]
ENSRNOT00000027260.4	1030	831.767	9830	319.112	ENSRNOG00000020060.4	Atf5	activating transcription factor 5 [Source:RGD Symbol;Acc:628902]
ENSRNOT00000066676.1	1922	1723.77	20331	318.472	ENSRNOG00000005157.6	Rbbp7	RB binding protein 7, chromatin remodeling factor [Source:RGD Symbol;Acc:620125]
ENSRNOT00000024406.6	477	280.695	3308.7	318.284	ENSRNOG00000017907.6	Ube2i	ubiquitin-conjugating enzyme E2I [Source:RGD Symbol;Acc:3926]
ENSRNOT00000079085.1	2403	2204.77	25965	317.992	ENSRNOG00000054172.1	Ctnnb1	catenin beta 1 [Source:RGD Symbol;Acc:70487]
ENSRNOT00000049942.4	4986	4787.77	56377	317.951	ENSRNOG00000003343.6	Canx	calnexin [Source:RGD Symbol;Acc:2266]
ENSRNOT00000044975.4	1727	1528.77	17951	317.058	ENSRNOG00000029500.5	Tapbp	TAP binding protein [Source:RGD Symbol;Acc:3819]
ENSRNOT00000012854.6	2010	1811.77	21245.7	316.636	ENSRNOG00000009568.6	Hdac1	histone deacetylase 1 [Source:RGD Symbol;Acc:1309799]
ENSRNOT00000022134.7	1102	903.767	10590.3	316.404	ENSRNOG00000016410.8	Prelid1	PRELI domain containing 1 [Source:RGD Symbol;Acc:1308082]
ENSRNOT00000014780.6	2368	2169.77	25380	315.842	ENSRNOG00000011052.6	Gars	glycyl-tRNA synthetase [Source:RGD Symbol;Acc:1307856]
ENSRNOT00000010601.6	2548	2349.77	27476	315.733	ENSRNOG00000008016.6	Ckap4	cytoskeleton-associated protein 4 [Source:RGD Symbol;Acc:1311989]
ENSRNOT00000008522.5	621	422.968	4908	313.32	ENSRNOG00000005963.7	Rab2a	RAB2A, member RAS oncogene family [Source:RGD Symbol;Acc:68323]
ENSRNOT00000039263.5	1314	1115.77	12945	313.271	ENSRNOG00000021802.5	Isg15	ISG15 ubiquitin-like modifier [Source:RGD Symbol;Acc:1310312]
ENSRNOT00000018043.8	2067	1868.77	21636	312.617	ENSRNOG00000013443.8	Tm9sf3	transmembrane 9 superfamily member 3 [Source:RGD Symbol;Acc:1564625]
ENSRNOT00000024119.4	1282	1083.77	12536	312.33	ENSRNOG00000017914.4	Cavin3	caveolae associated protein 3 [Source:RGD Symbol;Acc:628755]
ENSRNOT00000058092.4	1800	1601.77	18526.2	312.304	ENSRNOG00000001709.7	Ap2m1	adaptor related protein complex 2 subunit mu 1 [Source:RGD Symbol;Acc:620135]
ENSRNOT00000078939.1	2520	2321.77	26847.6	312.232	ENSRNOG00000018991.6	Gsn	gelsolin [Source:RGD Symbol;Acc:1303089]
ENSRNOT00000014033.5	3699	3500.77	40384	311.485	ENSRNOG00000010103.6	Eif4b	eukaryotic translation initiation factor 4B [Source:RGD Symbol;Acc:1306479]
ENSRNOT00000071913.2	375	185.349	2137	311.318	ENSRNOG00000049912.2	Atp5f1e	ATP synthase F1 subunit epsilon [Source:RGD Symbol;Acc:621374]
ENSRNOT00000030892.4	456	260.481	3003	311.294	ENSRNOG00000026616.4	Ndufb2	NADH:ubiquinone oxidoreductase subunit B2 [Source:RGD Symbol;Acc:1308130]
ENSRNOT00000014089.4	839	640.767	7382	311.075	ENSRNOG00000010549.4	Tspo	translocator protein [Source:RGD Symbol;Acc:2228]
ENSRNOT00000015808.7	1312	1113.77	12820	310.803	ENSRNOG00000011857.7	Mtpn	myotrophin [Source:RGD Symbol;Acc:619806]
ENSRNOT00000091448.1	2275	2076.77	23888.1	310.589	ENSRNOG00000023383.6	Ddx3x	DEAD-box helicase 3, X-linked [Source:RGD Symbol;Acc:1564771]
ENSRNOT00000070862.2	577	379.111	4353	310.037	ENSRNOG00000048320.2	Ndufa11	NADH:ubiquinone oxidoreductase subunit A11 [Source:RGD Symbol;Acc:1303292]
ENSRNOT00000013563.7	2045	1846.77	21170	309.528	ENSRNOG00000009683.7	Sdcbp	syndecan binding protein [Source:RGD Symbol;Acc:621497]
ENSRNOT00000077903.1	452	256.594	2928.89	308.211	ENSRNOG00000008605.4	Ost4	oligosaccharyltransferase complex subunit 4, non-catalytic [Source:RGD Symbol;Acc:2300150]
ENSRNOT00000058943.4	1531	1332.77	15189.5	307.737	ENSRNOG00000017127.6	Rpl28	ribosomal protein L28 [Source:RGD Symbol;Acc:621193]
ENSRNOT00000014439.4	1591	1392.77	15838	307.053	ENSRNOG00000010747.4	Dap	death-associated protein [Source:RGD Symbol;Acc:620641]
ENSRNOT00000046102.2	3194	2995.77	34010	306.542	ENSRNOG00000034242.3	Vcp	valosin-containing protein [Source:RGD Symbol;Acc:621595]
ENSRNOT00000041210.5	718	519.821	5892.11	306.061	ENSRNOG00000029115.5	LOC102555453	60S ribosomal protein L12-like [Source:RGD Symbol;Acc:7600399]
ENSRNOT00000075819.2	528	330.485	3741.56	305.698	ENSRNOG00000047225.2	Tma7	translation machinery associated 7 homolog [Source:RGD Symbol;Acc:1584795]
ENSRNOT00000023963.4	522	324.594	3661	304.544	ENSRNOG00000017622.4	Npm3	nucleophosmin/nucleoplasmin, 3 [Source:RGD Symbol;Acc:1565542]
ENSRNOT00000027756.6	1359	1160.77	13090	304.499	ENSRNOG00000020440.6	Fads2	fatty acid desaturase 2 [Source:RGD Symbol;Acc:68339]
ENSRNOT00000028484.4	839	640.767	7202	303.49	ENSRNOG00000020979.5	Psmb4	proteasome 20S subunit beta 4 [Source:RGD Symbol;Acc:61877]
ENSRNOT00000074325.1	1140	941.767	10555	302.626	ENSRNOG00000047746.1	AABR07000398.1
ENSRNOT00000073834.2	874	675.767	7545	301.477	ENSRNOG00000049920.2	Psma2	proteasome 20S subunit alpha 2 [Source:RGD Symbol;Acc:61842]
ENSRNOT00000011163.3	2530	2331.77	26024.8	301.366	ENSRNOG00000008450.3	LOC100359539	ribonucleotide reductase M2 polypeptide [Source:RGD Symbol;Acc:2323655]
ENSRNOT00000008041.7	3613	3414.77	37930	299.925	ENSRNOG00000005796.7	Ctnna1	catenin alpha 1 [Source:RGD Symbol;Acc:1359485]
ENSRNOT00000011082.4	2075	1876.77	20844	299.89	ENSRNOG00000008106.4	Shmt2	serine hydroxymethyltransferase 2 [Source:RGD Symbol;Acc:1308582]
ENSRNOT00000008477.5	1800	1601.77	17741.7	299.08	ENSRNOG00000006375.6	Vdac1	voltage-dependent anion channel 1 [Source:RGD Symbol;Acc:621575]
ENSRNOT00000005270.3	889	690.767	7613	297.588	ENSRNOG00000003863.3	Trir	telomerase RNA component interacting RNase [Source:RGD Symbol;Acc:1564093]
ENSRNOT00000016330.5	2912	2713.77	29765	296.159	ENSRNOG00000011971.8	C1s	complement C1s [Source:RGD Symbol;Acc:619983]
ENSRNOT00000066028.1	2266	2067.77	22593.5	295.034	ENSRNOG00000015857.6	Ctsa	cathepsin A [Source:RGD Symbol;Acc:1309070]
ENSRNOT00000073028.2	699	500.821	5466	294.699	ENSRNOG00000050735.2	Cd99	CD99 molecule (Xg blood group) [Source:RGD Symbol;Acc:1594332]
ENSRNOT00000091901.1	2828	2629.77	28669.9	294.374	ENSRNOG00000008825.6	Ssrp1	structure specific recognition protein 1 [Source:RGD Symbol;Acc:621143]
ENSRNOT00000051749.2	721	522.804	5698	294.29	ENSRNOG00000021151.4	Ppp1r14b	protein phosphatase 1, regulatory (inhibitor) subunit 14B [Source:RGD Symbol;Acc:628702]
ENSRNOT00000043005.2	466	270.017	2941.23	294.122	ENSRNOG00000031579.2	LOC100363469	ribosomal protein S24-like [Source:RGD Symbol;Acc:2322976]
ENSRNOT00000075610.2	2437	2238.77	24379	294.034	ENSRNOG00000010947.8	Mmp14	matrix metallopeptidase 14 [Source:RGD Symbol;Acc:620198]
ENSRNOT00000089292.1	4119	3920.77	42622.9	293.537	ENSRNOG00000011292.6	NEWGENE_621351	collagen, type I, alpha 2 [Source:RGD Symbol;Acc:9452897]
ENSRNOT00000089564.1	4119	3920.77	42622.9	293.537	ENSRNOG00000052925.1	NEWGENE_621351	collagen, type I, alpha 2 [Source:RGD Symbol;Acc:9452897]
ENSRNOT00000075517.3	644	445.882	4845.96	293.461	ENSRNOG00000050410.3	Snrpd3	small nuclear ribonucleoprotein D3 polypeptide [Source:RGD Symbol;Acc:1597573]
ENSRNOT00000011580.6	2653	2454.77	26609.1	292.693	ENSRNOG00000008676.6	Emp1	epithelial membrane protein 1 [Source:RGD Symbol;Acc:2552]
ENSRNOT00000024947.4	1751	1552.77	16811.7	292.345	ENSRNOG00000018371.4	Tubb6	tubulin, beta 6 class V [Source:RGD Symbol;Acc:1305887]
ENSRNOT00000009549.2	934	735.767	7944.64	291.558	ENSRNOG00000007221.2	Dut	deoxyuridine triphosphatase [Source:RGD Symbol;Acc:620849]
ENSRNOT00000078617.1	2387	2188.77	23620.4	291.392	ENSRNOG00000057706.1	Kdm5c	lysine demethylase 5C [Source:RGD Symbol;Acc:1560601]
ENSRNOT00000001822.5	1091	892.767	9568.26	289.392	ENSRNOG00000001348.5	Erp29	endoplasmic reticulum protein 29 [Source:RGD Symbol;Acc:619781]
ENSRNOT00000027494.7	2074	1875.77	20096	289.282	ENSRNOG00000020235.8	Hnrnpl	heterogeneous nuclear ribonucleoprotein L [Source:RGD Symbol;Acc:71059]
ENSRNOT00000025196.3	2054	1855.77	19881	289.272	ENSRNOG00000018487.3	Slc3a2	solute carrier family 3 member 2 [Source:RGD Symbol;Acc:3073]
ENSRNOT00000017234.5	1816	1617.77	17286.2	288.52	ENSRNOG00000042261.3	Hdgf	heparin binding growth factor [Source:RGD Symbol;Acc:70961]
ENSRNOT00000071153.1	1434	1235.77	13191	288.225	ENSRNOG00000049876.1	Prkar1a	protein kinase cAMP-dependent type I regulatory subunit alpha [Source:RGD Symbol;Acc:3391]
ENSRNOT00000022467.7	1494	1295.77	13738.8	286.294	ENSRNOG00000016589.7	Mlf2	myeloid leukemia factor 2 [Source:RGD Symbol;Acc:1306294]
ENSRNOT00000008329.7	562	364.198	3855	285.81	ENSRNOG00000006345.7	Sec61b	Sec61 translocon beta subunit [Source:RGD Symbol;Acc:1304997]
ENSRNOT00000022047.5	1116	917.767	9701	285.414	ENSRNOG00000016133.5	Sumo1	small ubiquitin-like modifier 1 [Source:RGD Symbol;Acc:1306919]
ENSRNOT00000078761.1	2375	2176.77	22993.3	285.22	ENSRNOG00000001269.6	Ppp1cc	protein phosphatase 1 catalytic subunit gamma [Source:RGD Symbol;Acc:3377]
ENSRNOT00000024952.6	2169	1970.77	20775	284.641	ENSRNOG00000018091.6	Gdi2	GDP dissociation inhibitor 2 [Source:RGD Symbol;Acc:61802]
ENSRNOT00000001227.7	2200	2001.77	21091.6	284.503	ENSRNOG00000000923.8	Cct6a	chaperonin containing TCP1 subunit 6A [Source:RGD Symbol;Acc:1304763]
ENSRNOT00000075602.2	459	263.349	2771	284.116	ENSRNOG00000047250.2	Gmfb	glia maturation factor, beta [Source:RGD Symbol;Acc:70910]
ENSRNOT00000086193.1	1446	1247.77	13039.9	282.183	ENSRNOG00000046272.2	LOC103689931	heterogeneous nuclear ribonucleoprotein A/B [Source:RGD Symbol;Acc:9343685]
ENSRNOT00000067702.2	750	551.785	5759.02	281.818	ENSRNOG00000042523.2	Ube2d2	ubiquitin-conjugating enzyme E2D 2 [Source:RGD Symbol;Acc:1591897]
ENSRNOT00000006239.7	858	659.767	6885	281.776	ENSRNOG00000004628.7	Dazap2	DAZ associated protein 2 [Source:RGD Symbol;Acc:1307407]
ENSRNOT00000026416.6	2554	2355.77	24581	281.746	ENSRNOG00000019507.6	Hnrnpul2	heterogeneous nuclear ribonucleoprotein U-like 2 [Source:RGD Symbol;Acc:1562784]
ENSRNOT00000065065.2	1271	1072.77	11182.2	281.458	ENSRNOG00000043377.4	Fdps	farnesyl diphosphate synthase [Source:RGD Symbol;Acc:68953]
ENSRNOT00000003674.7	454	258.516	2694	281.385	ENSRNOG00000002721.7	Ndufb4	NADH:ubiquinone oxidoreductase subunit B4 [Source:RGD Symbol;Acc:1307072]
ENSRNOT00000035890.5	555	357.234	3722	281.329	ENSRNOG00000028717.5	Ndufb7	NADH:ubiquinone oxidoreductase subunit B7 [Source:RGD Symbol;Acc:1308550]
ENSRNOT00000016432.6	2075	1876.77	19471.6	280.144	ENSRNOG00000012247.6	Rab7a	RAB7A, member RAS oncogene family [Source:RGD Symbol;Acc:61908]
ENSRNOT00000018454.5	3032	2833.77	29357	279.73	ENSRNOG00000013743.5	Sec61a1	Sec61 translocon alpha 1 subunit [Source:RGD Symbol;Acc:68321]
ENSRNOT00000091050.1	1203	1004.77	10387.2	279.143	ENSRNOG00000055579.1	Tmbim6	transmembrane BAX inhibitor motif containing 6 [Source:RGD Symbol;Acc:3842]
ENSRNOT00000010253.4	836	637.767	6587	278.88	ENSRNOG00000007356.4	Chmp3	charged multivesicular body protein 3 [Source:RGD Symbol;Acc:708556]
ENSRNOT00000065593.3	1596	1397.77	14429.8	278.752	ENSRNOG00000031993.5	Prim1	DNA primase subunit 1 [Source:RGD Symbol;Acc:621380]
ENSRNOT00000028744.6	3173	2974.77	30707	278.725	ENSRNOG00000021168.7	Anp32e	acidic nuclear phosphoprotein 32 family member E [Source:RGD Symbol;Acc:1310611]
ENSRNOT00000019265.6	1428	1229.77	12678.9	278.388	ENSRNOG00000014289.7	Arpc2	actin related protein 2/3 complex, subunit 2 [Source:RGD Symbol;Acc:1305848]
ENSRNOT00000073020.2	258	91.2957	941	278.311	ENSRNOG00000049032.2	AABR07029573.1
ENSRNOT00000071439.1	750	551.785	5685.12	278.202	ENSRNOG00000050669.2	LOC100911515	triosephosphate isomerase-like [Source:RGD Symbol;Acc:6492323]
ENSRNOT00000066204.3	1531	1332.77	13701.3	277.586	ENSRNOG00000013741.7	Ube2d3	ubiquitin-conjugating enzyme E2D 3 [Source:RGD Symbol;Acc:619912]
ENSRNOT00000068135.2	2536	2337.77	24029	277.54	ENSRNOG00000007492.7	Rpn2	ribophorin II [Source:RGD Symbol;Acc:62075]
ENSRNOT00000018310.7	2620	2421.77	24885	277.457	ENSRNOG00000013469.7	Txndc5	thioredoxin domain containing 5 [Source:RGD Symbol;Acc:2323973]
ENSRNOT00000025782.6	3036	2837.77	29149	277.356	ENSRNOG00000018761.6	Eif3c	eukaryotic translation initiation factor 3, subunit C [Source:RGD Symbol;Acc:1308871]
ENSRNOT00000056173.2	1803	1604.77	16472	277.157	ENSRNOG00000019328.6	Phgdh	phosphoglycerate dehydrogenase [Source:RGD Symbol;Acc:61987]
ENSRNOT00000051368.4	766	567.767	5820.64	276.816	ENSRNOG00000025731.6	Ptma	prothymosin alpha [Source:RGD Symbol;Acc:61829]
ENSRNOT00000019624.5	683	484.821	4968	276.689	ENSRNOG00000014568.5	Ndufb10	NADH:ubiquinone oxidoreductase subunit B10 [Source:RGD Symbol;Acc:1310782]
ENSRNOT00000026249.5	1210	1011.77	10345.4	276.096	ENSRNOG00000019326.5	Cfdp1	craniofacial development protein 1 [Source:RGD Symbol;Acc:735080]
ENSRNOT00000085894.1	1727	1528.77	15602.9	275.584	ENSRNOG00000018184.8	Tpm1	tropomyosin 1 [Source:RGD Symbol;Acc:3898]
ENSRNOT00000016751.6	547	349.305	3556	274.883	ENSRNOG00000012550.6	Uqcrh	ubiquinol-cytochrome c reductase hinge protein [Source:RGD Symbol;Acc:1305987]
ENSRNOT00000077930.1	201	53.9878	549	274.579	ENSRNOG00000057080.1	AABR07030926.1
ENSRNOT00000002732.6	823	624.767	6342	274.094	ENSRNOG00000001991.7	Atp5po	ATP synthase peripheral stalk subunit OSCP [Source:RGD Symbol;Acc:621379]
ENSRNOT00000084481.1	1410	1211.77	12230.8	272.538	ENSRNOG00000004992.7	Rab1a	RAB1A, member RAS oncogene family [Source:RGD Symbol;Acc:619736]
ENSRNOT00000022747.5	508	310.87	3125	271.433	ENSRNOG00000016952.5	Uqcr11	ubiquinol-cytochrome c reductase, complex III subunit XI [Source:RGD Symbol;Acc:1590985]
ENSRNOT00000001360.3	1672	1473.77	14805.1	271.253	ENSRNOG00000001030.8	Tsc22d1	TSC22 domain family, member 1 [Source:RGD Symbol;Acc:3850]
ENSRNOT00000056174.4	1750	1551.77	15560	270.754	ENSRNOG00000037198.4	Usp18	ubiquitin specific peptidase 18 [Source:RGD Symbol;Acc:1359153]
ENSRNOT00000001115.6	1700	1501.77	15013.9	269.949	ENSRNOG00000000841.7	Ddx39b	DExD-box helicase 39B [Source:RGD Symbol;Acc:70923]
ENSRNOT00000018562.4	1476	1277.77	12766	269.77	ENSRNOG00000013668.4	Capg	capping actin protein, gelsolin like [Source:RGD Symbol;Acc:1311724]
ENSRNOT00000019994.5	712	513.821	5132	269.691	ENSRNOG00000014908.5	Sf3b5	splicing factor 3b, subunit 5 [Source:RGD Symbol;Acc:1586993]
ENSRNOT00000040802.5	2568	2369.77	23627	269.212	ENSRNOG00000032989.5	Lrrn4	leucine rich repeat neuronal 4 [Source:RGD Symbol;Acc:1305256]
ENSRNOT00000085237.1	2240	2041.77	20335.3	268.928	ENSRNOG00000016758.7	Loxl2	lysyl oxidase-like 2 [Source:RGD Symbol;Acc:1308435]
ENSRNOT00000014058.7	1200	1001.77	9973.11	268.816	ENSRNOG00000010452.7	Cycs	cytochrome c, somatic [Source:RGD Symbol;Acc:2451]
ENSRNOT00000080485.1	1402	1203.77	11960.8	268.293	ENSRNOG00000017405.7	Raly	RALY heterogeneous nuclear ribonucleoprotein [Source:RGD Symbol;Acc:1307228]
ENSRNOT00000089407.1	1212	1013.77	10056.7	267.86	ENSRNOG00000016896.8	Rpl3	ribosomal protein L3 [Source:RGD Symbol;Acc:735105]
ENSRNOT00000084730.1	3410	3211.77	31789.4	267.257	ENSRNOG00000001436.5	Ywhag	tyrosine 3-monooxygenase/tryptophan 5-monooxygenase activation protein, gamma [Source:RGD Symbol;Acc:62002]
ENSRNOT00000014603.5	2061	1862.77	18418.9	266.99	ENSRNOG00000010833.5	Mthfd2	methylenetetrahydrofolate dehydrogenase (NADP+ dependent) 2, methenyltetrahydrofolate cyclohydrolase [Source:RGD Symbol;Acc:1311313]
ENSRNOT00000006607.5	1670	1471.77	14548	266.904	ENSRNOG00000004959.7	Actr2	actin related protein 2 [Source:RGD Symbol;Acc:1310826]
ENSRNOT00000007583.7	1180	981.767	9697	266.698	ENSRNOG00000005513.7	Srsf5	serine and arginine rich splicing factor 5 [Source:RGD Symbol;Acc:3664]
ENSRNOT00000012428.7	3288	3089.77	30460	266.192	ENSRNOG00000009152.7	Caprin1	cell cycle associated protein 1 [Source:RGD Symbol;Acc:1305707]
ENSRNOT00000048429.1	318	136.82	1347.89	266.01	ENSRNOG00000032885.1	LOC100363502	cytochrome c, somatic-like [Source:RGD Symbol;Acc:2322845]
ENSRNOT00000092432.1	744	545.785	5364.54	265.4	ENSRNOG00000001009.7	Bri3	brain protein I3 [Source:RGD Symbol;Acc:1309187]
ENSRNOT00000014912.6	2555	2356.77	23116	264.842	ENSRNOG00000011148.6	Ssr3	signal sequence receptor subunit 3 [Source:RGD Symbol;Acc:621630]
ENSRNOT00000091551.1	1173	974.767	9505.19	263.3	ENSRNOG00000054286.1	Rrm2	ribonucleotide reductase regulatory subunit M2 [Source:RGD Symbol;Acc:1598310]
ENSRNOT00000019323.5	1030	831.767	8094	262.756	ENSRNOG00000014058.5	Tomm22	translocase of outer mitochondrial membrane 22 [Source:RGD Symbol;Acc:1303260]
ENSRNOT00000000528.6	1072	873.767	8495.63	262.537	ENSRNOG00000000456.6	Psmb8	proteasome 20S subunit beta 8 [Source:RGD Symbol;Acc:3426]
ENSRNOT00000023606.6	1585	1386.77	13478.9	262.448	ENSRNOG00000017235.6	Atp6v0d1	ATPase H+ transporting V0 subunit D1 [Source:RGD Symbol;Acc:1306159]
ENSRNOT00000021535.5	1950	1751.77	16998	262.007	ENSRNOG00000015812.5	Tm4sf1	transmembrane 4 L six family member 1 [Source:RGD Symbol;Acc:1309652]
ENSRNOT00000014817.6	1427	1228.77	11922	261.982	ENSRNOG00000011020.6	Eif3l	eukaryotic translation initiation factor 3, subunit L [Source:RGD Symbol;Acc:1308230]
ENSRNOT00000074211.1	729	530.804	5147.53	261.852	ENSRNOG00000048194.1	LOC100912380	calpain small subunit 1-like [Source:RGD Symbol;Acc:6487412]
ENSRNOT00000072756.1	729	530.804	5147.53	261.852	ENSRNOG00000045747.1	Capns1	calpain, small subunit 1 [Source:RGD Symbol;Acc:2270]
ENSRNOT00000067854.2	658	459.837	4459	261.833	ENSRNOG00000025715.5	Dynlrb1	dynein light chain roadblock-type 1 [Source:RGD Symbol;Acc:619910]
ENSRNOT00000085344.1	5589	5390.77	52129	261.108	ENSRNOG00000053047.1	Top2a	DNA topoisomerase II alpha [Source:RGD Symbol;Acc:62048]
ENSRNOT00000072464.2	404	211.823	2048	261.064	ENSRNOG00000045555.2	LOC100910944	reactive oxygen species modulator 1-like [Source:RGD Symbol;Acc:6496011]
ENSRNOT00000024261.4	3191	2992.77	28898	260.727	ENSRNOG00000017952.4	Septin2	septin 2 [Source:RGD Symbol;Acc:620056]
ENSRNOT00000010433.7	2949	2750.77	26558	260.695	ENSRNOG00000007763.7	Plod1	procollagen-lysine, 2-oxoglutarate 5-dioxygenase 1 [Source:RGD Symbol;Acc:621382]
ENSRNOT00000047717.4	1639	1440.77	13906	260.615	ENSRNOG00000031965.4	Impdh2	inosine monophosphate dehydrogenase 2 [Source:RGD Symbol;Acc:735092]
ENSRNOT00000071817.2	683	484.821	4673.21	260.271	ENSRNOG00000051180.1	LOC100911516	coiled-coil-helix-coiled-coil-helix domain-containing protein 2, mitochondrial-like [Source:RGD Symbol;Acc:6492335]
ENSRNOT00000017000.4	285	111.013	1070	260.257	ENSRNOG00000012410.4	S100a1	S100 calcium binding protein A1 [Source:RGD Symbol;Acc:3614]
ENSRNOT00000019059.5	1668	1469.77	14138.9	259.752	ENSRNOG00000013949.7	Idh2	isocitrate dehydrogenase (NADP(+)) 2 [Source:RGD Symbol;Acc:1597139]
ENSRNOT00000027773.7	3870	3671.77	35268	259.356	ENSRNOG00000020433.7	Actn4	actinin alpha 4 [Source:RGD Symbol;Acc:61816]
ENSRNOT00000005014.4	907	708.767	6805	259.248	ENSRNOG00000003763.7	Prdx4	peroxiredoxin 4 [Source:RGD Symbol;Acc:620043]
ENSRNOT00000026767.7	669	470.837	4519.85	259.206	ENSRNOG00000019773.7	Egln1	egl-9 family hypoxia-inducible factor 1 [Source:RGD Symbol;Acc:631375]
ENSRNOT00000009815.5	561	363.198	3467	257.752	ENSRNOG00000007235.5	Atp5mc1	ATP synthase membrane subunit c locus 1 [Source:RGD Symbol;Acc:61933]
ENSRNOT00000037517.5	1086	887.767	8427	256.31	ENSRNOG00000006949.6	C1qbp	complement C1q binding protein [Source:RGD Symbol;Acc:2230]
ENSRNOT00000020325.7	1894	1695.77	16065	255.803	ENSRNOG00000014645.7	Aldh7a1	aldehyde dehydrogenase 7 family, member A1 [Source:RGD Symbol;Acc:1308614]
ENSRNOT00000027215.6	1589	1390.77	13173	255.753	ENSRNOG00000019981.6	Sdf4	stromal cell derived factor 4 [Source:RGD Symbol;Acc:621521]
ENSRNOT00000005601.4	2241	2042.77	19312.3	255.274	ENSRNOG00000013141.6	Eno2	enolase 2 [Source:RGD Symbol;Acc:2554]
ENSRNOT00000084917.1	1142	943.767	8909.28	254.9	ENSRNOG00000061216.1	Tubb5	tubulin, beta 5 class I [Source:RGD Symbol;Acc:628596]
ENSRNOT00000066133.3	2072	1873.77	17667.3	254.593	ENSRNOG00000017106.6	Csnk1a1	casein kinase 1, alpha 1 [Source:RGD Symbol;Acc:71098]
ENSRNOT00000079907.1	1058	859.767	8096.34	254.272	ENSRNOG00000060329.1	Emb	embigin [Source:RGD Symbol;Acc:621067]
ENSRNOT00000011937.5	1422	1223.77	11507	253.895	ENSRNOG00000008994.5	Arpc4	actin related protein 2/3 complex, subunit 4 [Source:RGD Symbol;Acc:1310096]
ENSRNOT00000076198.1	1477	1278.77	12013.9	253.679	ENSRNOG00000051193.1	AABR07010030.2
ENSRNOT00000088998.1	102	11.9431	112	253.217	ENSRNOG00000058059.1	AABR07037112.1
ENSRNOT00000011429.7	1313	1114.77	10442	252.924	ENSRNOG00000008103.7	Mdh1	malate dehydrogenase 1 [Source:RGD Symbol;Acc:3072]
ENSRNOT00000017409.7	1299	1100.77	10305	252.781	ENSRNOG00000012738.7	Eif3m	eukaryotic translation initiation factor 3, subunit M [Source:RGD Symbol;Acc:1565840]
ENSRNOT00000068185.3	1500	1301.77	12176.5	252.569	ENSRNOG00000005480.8	Ybx3	Y box binding protein 3 [Source:RGD Symbol;Acc:621056]
ENSRNOT00000084271.1	3052	2853.77	26655.1	252.205	ENSRNOG00000014336.7	Mcm5	minichromosome maintenance complex component 5 [Source:RGD Symbol;Acc:1306616]
ENSRNOT00000064700.3	1931	1732.77	16125	251.276	ENSRNOG00000009592.6	Cyb5r3	cytochrome b5 reductase 3 [Source:RGD Symbol;Acc:2502]
ENSRNOT00000039400.5	237	76.8897	715	251.09	ENSRNOG00000024813.5	Mzt1	mitotic spindle organizing protein 1 [Source:RGD Symbol;Acc:1592140]
ENSRNOT00000022138.6	1052	853.767	7862.69	248.67	ENSRNOG00000016530.7	Nsa2	NSA2 ribosome biogenesis factor [Source:RGD Symbol;Acc:621335]
ENSRNOT00000001921.4	2750	2551.77	23495	248.613	ENSRNOG00000001417.5	Plod3	procollagen-lysine, 2-oxoglutarate 5-dioxygenase 3 [Source:RGD Symbol;Acc:631339]
ENSRNOT00000010429.2	1057	858.767	7901	248.427	ENSRNOG00000007806.2	Arf5	ADP-ribosylation factor 5 [Source:RGD Symbol;Acc:621278]
ENSRNOT00000012295.6	1858	1659.77	15251.6	248.119	ENSRNOG00000009029.7	Nptn	neuroplastin [Source:RGD Symbol;Acc:620296]
ENSRNOT00000001625.5	2753	2554.77	23472	248.079	ENSRNOG00000001214.5	Pfkl	phosphofructokinase, liver type [Source:RGD Symbol;Acc:3311]
ENSRNOT00000019351.5	2148	1949.77	17902	247.919	ENSRNOG00000013774.5	Lmnb1	lamin B1 [Source:RGD Symbol;Acc:620522]
ENSRNOT00000020020.5	804	605.767	5528	246.407	ENSRNOG00000014890.5	Mrpl43	mitochondrial ribosomal protein L43 [Source:RGD Symbol;Acc:1307593]
ENSRNOT00000017090.5	1903	1704.77	15542.5	246.176	ENSRNOG00000012269.5	Lpcat3	lysophosphatidylcholine acyltransferase 3 [Source:RGD Symbol;Acc:1310223]
ENSRNOT00000086427.1	459	263.349	2400.12	246.089	ENSRNOG00000053633.1	LOC103690354	ribonuclease pancreatic beta-type [Source:RGD Symbol;Acc:9117758]
ENSRNOT00000008972.6	3166	2967.77	27025.3	245.885	ENSRNOG00000006197.7	Calu	calumenin [Source:RGD Symbol;Acc:620383]
ENSRNOT00000016881.5	1354	1155.77	10520.4	245.783	ENSRNOG00000012641.5	Sfr1	SWI5-dependent homologous recombination repair protein 1 [Source:RGD Symbol;Acc:1305481]
ENSRNOT00000074415.2	1113	914.767	8300	244.996	ENSRNOG00000050044.2	Ptp4a2	protein tyrosine phosphatase 4A2 [Source:RGD Symbol;Acc:619786]
ENSRNOT00000085644.1	622	423.968	3846.52	244.977	ENSRNOG00000054140.1	Myl6	myosin light chain 6 [Source:RGD Symbol;Acc:1589019]
ENSRNOT00000049822.3	1304	1105.77	10032	244.971	ENSRNOG00000012455.6	Tardbp	TAR DNA binding protein [Source:RGD Symbol;Acc:1310906]
ENSRNOT00000035788.5	1006	807.767	7322	244.757	ENSRNOG00000026124.5	Id3	inhibitor of DNA binding 3, HLH protein [Source:RGD Symbol;Acc:2860]
ENSRNOT00000075790.2	372	182.762	1655	244.514	ENSRNOG00000046172.2	Sf3b6	splicing factor 3B, subunit 6 [Source:RGD Symbol;Acc:2318878]
ENSRNOT00000056169.3	1104	905.767	8197.4	244.372	ENSRNOG00000013577.7	Kdelr3	KDEL endoplasmic reticulum protein retention receptor 3 [Source:RGD Symbol;Acc:1311536]
ENSRNOT00000041880.3	541	343.328	3095.86	243.48	ENSRNOG00000042499.1	LOC100364435	thymosin, beta 10-like [Source:RGD Symbol;Acc:2321025]
ENSRNOT00000075674.2	1711	1512.77	13614.9	243.015	ENSRNOG00000047287.2	Nucks1	nuclear casein kinase and cyclin-dependent kinase substrate 1 [Source:RGD Symbol;Acc:620993]
ENSRNOT00000027028.6	399	207.209	1863	242.771	ENSRNOG00000019936.7	Anapc15	anaphase promoting complex subunit 15 [Source:RGD Symbol;Acc:1311634]
ENSRNOT00000077528.1	3118	2919.77	26248.2	242.741	ENSRNOG00000057706.1	Kdm5c	lysine demethylase 5C [Source:RGD Symbol;Acc:1560601]
ENSRNOT00000021862.6	2077	1878.77	16872	242.485	ENSRNOG00000016064.6	Tkt	transketolase [Source:RGD Symbol;Acc:621036]
ENSRNOT00000010579.7	950	751.767	6751	242.48	ENSRNOG00000007743.7	Mgst1	microsomal glutathione S-transferase 1 [Source:RGD Symbol;Acc:70927]
ENSRNOT00000048125.4	1192	993.767	8923.99	242.474	ENSRNOG00000015733.6	Myl12b	myosin light chain 12B [Source:RGD Symbol;Acc:628855]
ENSRNOT00000008120.4	1651	1452.77	13034.1	242.256	ENSRNOG00000025481.4	Dctn2	dynactin subunit 2 [Source:RGD Symbol;Acc:1303182]
ENSRNOT00000085843.1	2077	1878.77	16849.4	242.16	ENSRNOG00000057676.1	Polr2m	RNA polymerase II subunit M [Source:RGD Symbol;Acc:619847]
ENSRNOT00000024656.3	729	530.804	4730	240.613	ENSRNOG00000018207.4	Dynlt1	dynein light chain Tctex-type 1 [Source:RGD Symbol;Acc:620261]
ENSRNOT00000088821.1	1308	1109.77	9869.83	240.143	ENSRNOG00000001709.7	Ap2m1	adaptor related protein complex 2 subunit mu 1 [Source:RGD Symbol;Acc:620135]
ENSRNOT00000045753.2	1825	1626.77	14466	240.112	ENSRNOG00000039666.3	Srpx	sushi-repeat-containing protein, X-linked [Source:RGD Symbol;Acc:70950]
ENSRNOT00000007567.4	785	586.767	5214.98	239.982	ENSRNOG00000005512.4	Ndufa4	NDUFA4, mitochondrial complex associated [Source:RGD Symbol;Acc:1584719]
ENSRNOT00000028373.6	2114	1915.77	17023	239.93	ENSRNOG00000020897.6	Prpf19	pre-mRNA processing factor 19 [Source:RGD Symbol;Acc:708496]
ENSRNOT00000011557.5	709	510.821	4536	239.77	ENSRNOG00000008733.5	Lsm3	LSM3 homolog, U6 small nuclear RNA and mRNA degradation associated [Source:RGD Symbol;Acc:1305971]
ENSRNOT00000019234.4	615	416.968	3698	239.472	ENSRNOG00000014130.4	Cks2	CDC28 protein kinase regulatory subunit 2 [Source:RGD Symbol;Acc:1562047]
ENSRNOT00000010185.6	1242	1043.77	9177	237.404	ENSRNOG00000006818.6	Arl6ip5	ADP-ribosylation factor like GTPase 6 interacting protein 5 [Source:RGD Symbol;Acc:708572]
ENSRNOT00000021221.4	929	730.767	6423.78	237.358	ENSRNOG00000015844.4	Snrpd2	small nuclear ribonucleoprotein D2 polypeptide [Source:RGD Symbol;Acc:1593018]
ENSRNOT00000021751.4	2551	2352.77	20636	236.831	ENSRNOG00000016152.4	Dek	DEK proto-oncogene [Source:RGD Symbol;Acc:1303246]
ENSRNOT00000046126.3	2142	1943.77	17035	236.64	ENSRNOG00000019456.6	Kars	lysyl-tRNA synthetase [Source:RGD Symbol;Acc:1359653]
ENSRNOT00000020670.4	799	600.767	5263.68	236.578	ENSRNOG00000014625.4	Atp5f1d	ATP synthase F1 subunit delta [Source:RGD Symbol;Acc:621372]
ENSRNOT00000001123.7	928	729.767	6390.41	236.448	ENSRNOG00000000847.8	Csnk2b	casein kinase 2 beta [Source:RGD Symbol;Acc:619978]
ENSRNOT00000039997.4	604	405.968	3550	236.117	ENSRNOG00000028411.6	Pcnp	PEST proteolytic signal containing nuclear protein [Source:RGD Symbol;Acc:1563775]
ENSRNOT00000067739.2	1901	1702.77	14873	235.849	ENSRNOG00000000248.6	Srsf2	serine and arginine rich splicing factor 2 [Source:RGD Symbol;Acc:1359422]
ENSRNOT00000024863.6	1237	1038.77	9029	234.7	ENSRNOG00000018367.6	Taldo1	transaldolase 1 [Source:RGD Symbol;Acc:620674]
ENSRNOT00000025939.4	657	458.837	3986.51	234.598	ENSRNOG00000018937.4	Gstm7	glutathione S-transferase, mu 7 [Source:RGD Symbol;Acc:621287]
ENSRNOT00000082066.1	1890	1691.77	14691	234.478	ENSRNOG00000055446.1	Amfr	autocrine motility factor receptor [Source:RGD Symbol;Acc:1311551]
ENSRNOT00000024264.8	2605	2406.77	20885.4	234.315	ENSRNOG00000017852.8	Nars1	asparaginyl-tRNA synthetase 1 [Source:RGD Symbol;Acc:1307238]
ENSRNOT00000002924.5	2671	2472.77	21432	234.03	ENSRNOG00000002125.5	Ccni	cyclin I [Source:RGD Symbol;Acc:1309209]
ENSRNOT00000014216.5	948	749.767	6496.72	233.969	ENSRNOG00000010645.5	Lgals3	galectin 3 [Source:RGD Symbol;Acc:69356]
ENSRNOT00000001066.6	1493	1294.77	11197	233.508	ENSRNOG00000029360.5	Serinc1	serine incorporator 1 [Source:RGD Symbol;Acc:727843]
ENSRNOT00000024156.5	1614	1415.77	12233	233.309	ENSRNOG00000017854.5	Ucp2	uncoupling protein 2 [Source:RGD Symbol;Acc:3932]
ENSRNOT00000087627.1	689	490.821	4224.14	232.384	ENSRNOG00000033611.5	Wdr83os	WD repeat domain 83 opposite strand [Source:RGD Symbol;Acc:1564058]
ENSRNOT00000038612.5	3295	3096.77	26607.3	231.998	ENSRNOG00000024128.6	Aco2	aconitase 2 [Source:RGD Symbol;Acc:621360]
ENSRNOT00000018711.4	2560	2361.77	20272	231.766	ENSRNOG00000013492.4	Cap1	cyclase associated actin cytoskeleton regulatory protein 1 [Source:RGD Symbol;Acc:620309]
ENSRNOT00000014464.7	2625	2426.77	20788	231.3	ENSRNOG00000010668.7	Anxa6	annexin A6 [Source:RGD Symbol;Acc:621172]
ENSRNOT00000006906.3	443	248.084	2123.7	231.146	ENSRNOG00000005203.3	Sec61g	Sec61 translocon gamma subunit [Source:RGD Symbol;Acc:1596170]
ENSRNOT00000051155.3	4386	4187.77	35793.9	230.79	ENSRNOG00000031479.4	Hdlbp	high density lipoprotein binding protein [Source:RGD Symbol;Acc:620962]
ENSRNOT00000082686.1	922	723.767	6180	230.558	ENSRNOG00000056853.1	Psma7	proteasome 20S subunit alpha 7 [Source:RGD Symbol;Acc:61851]
ENSRNOT00000000532.7	917	718.767	6125.37	230.11	ENSRNOG00000000459.7	Psmb9	proteasome 20S subunit beta 9 [Source:RGD Symbol;Acc:3427]
ENSRNOT00000024711.5	924	725.767	6179.37	229.899	ENSRNOG00000018289.6	Park7	Parkinsonism associated deglycase [Source:RGD Symbol;Acc:621808]
ENSRNOT00000019107.7	844	645.767	5493	229.681	ENSRNOG00000014201.7	Manf	mesencephalic astrocyte-derived neurotrophic factor [Source:RGD Symbol;Acc:1307252]
ENSRNOT00000017532.5	2928	2729.77	23180	229.287	ENSRNOG00000013057.6	Prc1	protein regulator of cytokinesis 1 [Source:RGD Symbol;Acc:1311754]
ENSRNOT00000065962.1	376	186.24	1580	229.073	ENSRNOG00000043114.1	Tomm7	translocase of outer mitochondrial membrane 7 [Source:RGD Symbol;Acc:1591393]
ENSRNOT00000011945.4	2306	2107.77	17848	228.643	ENSRNOG00000008816.4	Gpnmb	glycoprotein nmb [Source:RGD Symbol;Acc:71008]
ENSRNOT00000090085.1	968	769.767	6514.3	228.507	ENSRNOG00000053557.1	LOC102553386	SUMO-conjugating enzyme UBC9-like [Source:RGD Symbol;Acc:7518044]
ENSRNOT00000026197.6	1382	1183.77	9990	227.872	ENSRNOG00000019277.8	Vdac3	voltage-dependent anion channel 3 [Source:RGD Symbol;Acc:621577]
ENSRNOT00000002358.6	2946	2747.77	23130	227.293	ENSRNOG00000001719.6	Psmd2	proteasome 26S subunit, non-ATPase 2 [Source:RGD Symbol;Acc:1305752]
ENSRNOT00000081761.2	429	234.963	1977.6	227.264	ENSRNOG00000052226.2	LOC108348144	NADH dehydrogenase [ubiquinone] 1 alpha subcomplex subunit 1 [Source:RGD Symbol;Acc:11430296]
ENSRNOT00000019531.4	1832	1633.77	13728.9	226.902	ENSRNOG00000014160.4	Tcp1	t-complex 1 [Source:RGD Symbol;Acc:3832]
ENSRNOT00000007623.7	943	744.767	6242	226.305	ENSRNOG00000005763.7	Arl1	ADP-ribosylation factor like GTPase 1 [Source:RGD Symbol;Acc:621326]
ENSRNOT00000038138.4	1406	1207.77	10118.1	226.208	ENSRNOG00000020527.5	Drap1	Dr1 associated protein 1 [Source:RGD Symbol;Acc:1308477]
ENSRNOT00000024436.7	1956	1757.77	14695.8	225.748	ENSRNOG00000018159.7	Anxa4	annexin A4 [Source:RGD Symbol;Acc:621171]
ENSRNOT00000046035.4	475	278.76	2329.21	225.615	ENSRNOG00000032204.4	Uqcrb	ubiquinol-cytochrome c reductase binding protein [Source:RGD Symbol;Acc:1311971]
ENSRNOT00000092513.1	528	330.485	2759.38	225.45	ENSRNOG00000018320.6	Rps15a	ribosomal protein S15a [Source:RGD Symbol;Acc:619939]
ENSRNOT00000015186.5	1482	1283.77	10716	225.392	ENSRNOG00000010958.5	Prdx3	peroxiredoxin 3 [Source:RGD Symbol;Acc:620040]
ENSRNOT00000012455.5	1666	1467.77	12233	225.044	ENSRNOG00000009325.5	Fuca1	alpha-L-fucosidase 1 [Source:RGD Symbol;Acc:2636]
ENSRNOT00000010895.6	2857	2658.77	22158	225.031	ENSRNOG00000007519.6	Tmem43	transmembrane protein 43 [Source:RGD Symbol;Acc:1549711]
ENSRNOT00000077884.1	3285	3086.77	25685.4	224.685	ENSRNOG00000054775.1	Fkbp11	FKBP prolyl isomerase 11 [Source:RGD Symbol;Acc:1306161]
ENSRNOT00000022341.4	1160	961.767	7993	224.404	ENSRNOG00000016587.4	Ninj1	ninjurin 1 [Source:RGD Symbol;Acc:3179]
ENSRNOT00000028496.4	1445	1246.77	10296	222.984	ENSRNOG00000020994.6	Slc25a39	solute carrier family 25, member 39 [Source:RGD Symbol;Acc:1306193]
ENSRNOT00000059255.5	1989	1790.77	14787.6	222.971	ENSRNOG00000003147.8	Sqstm1	sequestosome 1 [Source:RGD Symbol;Acc:69287]
ENSRNOT00000010101.5	1984	1785.77	14712	222.453	ENSRNOG00000007089.5	Lgmn	legumain [Source:RGD Symbol;Acc:619832]
ENSRNOT00000016509.6	560	362.198	2982	222.307	ENSRNOG00000012383.6	Ndufc2	NADH:ubiquinone oxidoreductase subunit C2 [Source:RGD Symbol;Acc:1307511]
ENSRNOT00000088623.1	6350	6151.77	50337.8	220.946	ENSRNOG00000007133.7	Plxnb2	plexin B2 [Source:RGD Symbol;Acc:1305495]
ENSRNOT00000027088.2	980	781.767	6392	220.775	ENSRNOG00000019980.2	Tomm20	translocase of outer mitochondrial membrane 20 [Source:RGD Symbol;Acc:708467]
ENSRNOT00000072930.2	195	50.5576	412.417	220.263	ENSRNOG00000050796.2	AABR07026893.1
ENSRNOT00000028176.6	1679	1480.77	12062.1	219.951	ENSRNOG00000020763.8	Snrnp70	small nuclear ribonucleoprotein U1 subunit 70 [Source:RGD Symbol;Acc:1307120]
ENSRNOT00000026974.6	571	373.161	3037.95	219.824	ENSRNOG00000019908.6	Lamtor2	late endosomal/lysosomal adaptor, MAPK and MTOR activator 2 [Source:RGD Symbol;Acc:1562501]
ENSRNOT00000082846.1	1606	1407.77	11460	219.809	ENSRNOG00000058539.1	Ccnb1	cyclin B1 [Source:RGD Symbol;Acc:2291]
ENSRNOT00000049812.3	2737	2538.77	20637.8	219.498	ENSRNOG00000021202.8	Rtn3	reticulon 3 [Source:RGD Symbol;Acc:620988]
ENSRNOT00000056592.3	2611	2412.77	19613	219.493	ENSRNOG00000015642.6	Pabpc4	poly(A) binding protein, cytoplasmic 4 [Source:RGD Symbol;Acc:1305015]
ENSRNOT00000011991.5	1745	1546.77	12567	219.38	ENSRNOG00000008937.5	Csrp1	cysteine and glycine-rich protein 1 [Source:RGD Symbol;Acc:62053]
ENSRNOT00000001918.6	1344	1145.77	9309	219.38	ENSRNOG00000001415.6	Ap1s1	adaptor related protein complex 1 subunit sigma 1 [Source:RGD Symbol;Acc:1305911]
ENSRNOT00000087625.1	1781	1582.77	12838	219.014	ENSRNOG00000053583.1	Mapk3	mitogen activated protein kinase 3 [Source:RGD Symbol;Acc:3046]
ENSRNOT00000013224.6	1491	1292.77	10478	218.851	ENSRNOG00000009778.6	Tmem59	transmembrane protein 59 [Source:RGD Symbol;Acc:1310313]
ENSRNOT00000075273.2	270	99.8642	809	218.741	ENSRNOG00000047309.2	Smim10l1	small integral membrane protein 10 like 1 [Source:MGI Symbol;Acc:MGI:1914379]
ENSRNOT00000075270.1	2622	2423.77	19621	218.586	ENSRNOG00000046794.1	Khdrbs1	KH RNA binding domain containing, signal transduction associated 1 [Source:RGD Symbol;Acc:621459]
ENSRNOT00000064068.3	1785	1586.77	12837.2	218.448	ENSRNOG00000028062.7	Arpc5	actin related protein 2/3 complex, subunit 5 [Source:RGD Symbol;Acc:1311791]
ENSRNOT00000018173.6	1189	990.767	8013.95	218.407	ENSRNOG00000013493.6	Psma4	proteasome 20S subunit alpha 4 [Source:RGD Symbol;Acc:61846]
ENSRNOT00000000635.6	1802	1603.77	12961.3	218.222	ENSRNOG00000000527.6	Mtch1	mitochondrial carrier 1 [Source:RGD Symbol;Acc:1309262]
ENSRNOT00000011174.5	1640	1441.77	11644.3	218.076	ENSRNOG00000007998.5	Ssb	small RNA binding exonuclease protection factor La [Source:RGD Symbol;Acc:620804]
ENSRNOT00000008940.6	1284	1085.77	8759	217.826	ENSRNOG00000006327.6	Rcc2	regulator of chromosome condensation 2 [Source:RGD Symbol;Acc:1309986]
ENSRNOT00000060514.3	1279	1080.77	8701.71	217.402	ENSRNOG00000011621.7	Hnrnpc	heterogeneous nuclear ribonucleoprotein C [Source:RGD Symbol;Acc:1309982]
ENSRNOT00000022573.5	1838	1639.77	13190	217.197	ENSRNOG00000016251.5	Dnaja2	DnaJ heat shock protein family (Hsp40) member A2 [Source:RGD Symbol;Acc:71001]
ENSRNOT00000015085.6	1260	1061.77	8532.25	216.983	ENSRNOG00000039980.4	Slc25a5	solute carrier family 25 member 5 [Source:RGD Symbol;Acc:620353]
ENSRNOT00000049895.3	2684	2485.77	19974	216.968	ENSRNOG00000025570.5	Os9	OS9, endoplasmic reticulum lectin [Source:RGD Symbol;Acc:1359574]
ENSRNOT00000001872.5	2190	1991.77	15986	216.717	ENSRNOG00000001385.5	Plbd2	phospholipase B domain containing 2 [Source:RGD Symbol;Acc:708461]
ENSRNOT00000079380.1	1307	1108.77	8894.38	216.604	ENSRNOG00000051720.1	Nudc	nuclear distribution C, dynein complex regulator [Source:RGD Symbol;Acc:3215]
ENSRNOT00000004969.6	2917	2718.77	21774	216.251	ENSRNOG00000003703.6	Mcm6	minichromosome maintenance complex component 6 [Source:RGD Symbol;Acc:61967]
ENSRNOT00000001695.6	3695	3496.77	28004	216.244	ENSRNOG00000001254.6	Col6a2	collagen type VI alpha 2 chain [Source:RGD Symbol;Acc:1305585]
ENSRNOT00000040229.3	1656	1457.77	11670	216.159	ENSRNOG00000037162.3	Slbp	stem-loop binding protein [Source:RGD Symbol;Acc:1584682]
ENSRNOT00000027985.7	1106	907.767	7259	215.92	ENSRNOG00000020619.7	Eif3g	eukaryotic translation initiation factor 3, subunit G [Source:RGD Symbol;Acc:1307191]
ENSRNOT00000083750.1	1512	1313.77	10503	215.867	ENSRNOG00000055257.1	Selenof	selenoprotein F [Source:RGD Symbol;Acc:621291]
ENSRNOT00000040430.4	3636	3437.77	27473	215.785	ENSRNOG00000030019.4	Atp1a1	ATPase Na+/K+ transporting subunit alpha 1 [Source:RGD Symbol;Acc:2167]
ENSRNOT00000086065.1	838	639.767	5092	214.911	ENSRNOG00000058288.1	Tcf19	transcription factor 19 [Source:RGD Symbol;Acc:1302974]
ENSRNOT00000008737.6	2845	2646.77	21035	214.594	ENSRNOG00000006444.6	Fkbp4	FKBP prolyl isomerase 4 [Source:RGD Symbol;Acc:628729]
ENSRNOT00000021391.6	1704	1505.77	11965	214.559	ENSRNOG00000015914.7	U2af2	U2 small nuclear RNA auxiliary factor 2 [Source:RGD Symbol;Acc:1310690]
ENSRNOT00000028438.4	532	334.452	2656	214.43	ENSRNOG00000020941.4	Psenen	presenilin enhancer gamma secretase subunit [Source:RGD Symbol;Acc:1312037]
ENSRNOT00000020323.3	763	564.785	4483.12	214.333	ENSRNOG00000015131.6	Ube2c	ubiquitin-conjugating enzyme E2C [Source:RGD Symbol;Acc:1305382]
ENSRNOT00000010826.3	793	594.767	4712	213.919	ENSRNOG00000007971.6	Wbp2	WW domain binding protein 2 [Source:RGD Symbol;Acc:620032]
ENSRNOT00000064916.2	770	571.767	4520.11	213.462	ENSRNOG00000019895.6	Nedd8	NEDD8 ubiquitin like modifier [Source:RGD Symbol;Acc:3158]
ENSRNOT00000023060.5	2066	1867.77	14747.5	213.2	ENSRNOG00000017073.5	Ca9	carbonic anhydrase 9 [Source:RGD Symbol;Acc:1306426]
ENSRNOT00000023535.5	1921	1722.77	13587	212.955	ENSRNOG00000017359.5	Itm2c	integral membrane protein 2C [Source:RGD Symbol;Acc:1309503]
ENSRNOT00000066947.3	5125	4926.77	38848	212.911	ENSRNOG00000010117.7	Eif3a	eukaryotic translation initiation factor 3, subunit A [Source:RGD Symbol;Acc:1307269]
ENSRNOT00000002037.6	1068	869.767	6847	212.563	ENSRNOG00000001488.6	Psmb1	proteasome 20S subunit beta 1 [Source:RGD Symbol;Acc:621092]
ENSRNOT00000085214.1	4801	4602.77	36098.9	211.771	ENSRNOG00000002393.7	Eprs	glutamyl-prolyl-tRNA synthetase [Source:RGD Symbol;Acc:1310952]
ENSRNOT00000015958.4	653	454.837	3565	211.639	ENSRNOG00000011821.4	S100a4	S100 calcium-binding protein A4 [Source:RGD Symbol;Acc:3245]
ENSRNOT00000047750.4	1244	1045.77	8196.56	211.635	ENSRNOG00000033057.4	AABR07025010.1
ENSRNOT00000083472.1	925	726.767	5686.39	211.268	ENSRNOG00000006789.6	Ddit3	DNA-damage inducible transcript 3 [Source:RGD Symbol;Acc:62391]
ENSRNOT00000028725.6	633	434.911	3400	211.091	ENSRNOG00000021153.6	Fkbp2	FKBP prolyl isomerase 2 [Source:RGD Symbol;Acc:1560660]
ENSRNOT00000074058.2	3135	2936.77	22927.7	210.806	ENSRNOG00000045752.2	Rrm1	ribonucleotide reductase catalytic subunit M1 [Source:RGD Symbol;Acc:1592569]
ENSRNOT00000091765.1	2229	2030.77	15833.2	210.523	ENSRNOG00000014562.6	Hnrnpf	heterogeneous nuclear ribonucleoprotein F [Source:RGD Symbol;Acc:620366]
ENSRNOT00000015009.6	627	428.954	3339	210.183	ENSRNOG00000011214.6	Polr2f	RNA polymerase II subunit F [Source:RGD Symbol;Acc:708567]
ENSRNOT00000074081.2	951	752.767	5859	210.162	ENSRNOG00000045860.2	U2af1	U2 small nuclear RNA auxiliary factor 1 [Source:RGD Symbol;Acc:1584190]
ENSRNOT00000018462.6	1700	1501.77	11645.4	209.384	ENSRNOG00000013505.6	Vdac2	voltage-dependent anion channel 2 [Source:RGD Symbol;Acc:621576]
ENSRNOT00000011272.7	477	280.695	2173.97	209.127	ENSRNOG00000008512.7	Btf3l4	basic transcription factor 3-like 4 [Source:RGD Symbol;Acc:1311774]
ENSRNOT00000020795.6	1952	1753.77	13481.3	207.564	ENSRNOG00000015329.6	Kpna2	karyopherin subunit alpha 2 [Source:RGD Symbol;Acc:621419]
ENSRNOT00000066253.2	969	770.767	5918.76	207.347	ENSRNOG00000001062.6	Kmt5a	lysine methyltransferase 5A [Source:RGD Symbol;Acc:1587560]
ENSRNOT00000027273.7	3662	3463.77	26595	207.321	ENSRNOG00000020129.7	Cdh3	cadherin 3 [Source:RGD Symbol;Acc:621089]
ENSRNOT00000050878.4	477	280.695	2154	207.206	ENSRNOG00000028884.4	Atp5mg	ATP synthase membrane subunit g [Source:RGD Symbol;Acc:1303259]
ENSRNOT00000042098.3	1143	944.767	7245	207.064	ENSRNOG00000031766.3	Mt-cyb	mitochondrially encoded cytochrome b [Source:RGD Symbol;Acc:620081]
ENSRNOT00000031164.3	2418	2219.77	17015.7	206.982	ENSRNOG00000028629.3	Akt1	AKT serine/threonine kinase 1 [Source:RGD Symbol;Acc:2081]
ENSRNOT00000021372.6	567	369.161	2828	206.849	ENSRNOG00000015953.6	Oaz2	ornithine decarboxylase antizyme 2 [Source:RGD Symbol;Acc:1562933]
ENSRNOT00000024677.6	2538	2339.77	17917.4	206.772	ENSRNOG00000018233.6	Gas6	growth arrest specific 6 [Source:RGD Symbol;Acc:61913]
ENSRNOT00000035048.4	1750	1551.77	11843.3	206.082	ENSRNOG00000025580.5	LOC100912618	ubiquitin-conjugating enzyme E2 variant 1-like [Source:RGD Symbol;Acc:6486058]
ENSRNOT00000078775.1	336	151.697	1156.94	205.933	ENSRNOG00000055634.1	AABR07024908.1
ENSRNOT00000060444.1	2919	2720.77	20732	205.751	ENSRNOG00000001253.6	Eif3b	eukaryotic translation initiation factor 3, subunit B [Source:RGD Symbol;Acc:1309018]
ENSRNOT00000016137.6	2625	2426.77	18461.2	205.411	ENSRNOG00000010474.7	Hmces	5-hydroxymethylcytosine binding, ES cell specific [Source:RGD Symbol;Acc:1559800]
ENSRNOT00000025380.6	210	59.5604	453.084	205.406	ENSRNOG00000049442.2	AABR07026317.1
ENSRNOT00000020681.6	1604	1405.77	10666.7	204.884	ENSRNOG00000014765.6	Vapa	VAMP associated protein A [Source:RGD Symbol;Acc:61803]
ENSRNOT00000091464.1	1336	1137.77	8629.14	204.788	ENSRNOG00000012999.7	Phb2	prohibitin 2 [Source:RGD Symbol;Acc:620203]
ENSRNOT00000028971.4	3409	3210.77	24326.9	204.583	ENSRNOG00000021338.4	Tmem132a	transmembrane protein 132A [Source:RGD Symbol;Acc:727936]
ENSRNOT00000013600.4	1102	903.767	6842	204.417	ENSRNOG00000010184.4	Brk1	BRICK1 subunit of SCAR/WAVE actin nucleating complex [Source:RGD Symbol;Acc:1598136]
ENSRNOT00000045063.3	4380	4181.77	31617	204.151	ENSRNOG00000016398.6	Clstn1	calsyntenin 1 [Source:RGD Symbol;Acc:1306458]
ENSRNOT00000001499.6	1514	1315.77	9946	204.108	ENSRNOG00000001135.6	Wsb2	WD repeat and SOCS box-containing 2 [Source:RGD Symbol;Acc:1359599]
ENSRNOT00000025510.4	1277	1078.77	8144.81	203.866	ENSRNOG00000018818.6	Txnl1	thioredoxin-like 1 [Source:RGD Symbol;Acc:621717]
ENSRNOT00000026705.6	3075	2876.77	21701.7	203.695	ENSRNOG00000019638.7	Lmna	lamin A/C [Source:RGD Symbol;Acc:620456]
ENSRNOT00000041638.6	2336	2137.77	16078.6	203.086	ENSRNOG00000004621.8	Rtn4	reticulon 4 [Source:RGD Symbol;Acc:620989]
ENSRNOT00000004351.4	1492	1293.77	9728	203.029	ENSRNOG00000003232.4	Slc9a3r1	SLC9A3 regulator 1 [Source:RGD Symbol;Acc:708538]
ENSRNOT00000091399.1	1049	850.767	6379.74	202.481	ENSRNOG00000058484.1	Anp32a	acidic nuclear phosphoprotein 32 family member A [Source:RGD Symbol;Acc:11508551]
ENSRNOT00000048504.5	773	574.767	4309.97	202.476	ENSRNOG00000042094.3	Prr13	proline rich 13 [Source:RGD Symbol;Acc:1307129]
ENSRNOT00000025570.3	8069	7870.77	58887.4	202.021	ENSRNOG00000018668.3	Glg1	golgi glycoprotein 1 [Source:RGD Symbol;Acc:69345]
ENSRNOT00000019040.4	2417	2218.77	16568.8	201.638	ENSRNOG00000014165.7	Ssr1	signal sequence receptor subunit 1 [Source:RGD Symbol;Acc:1310961]
ENSRNOT00000077765.1	216	63.2405	472	201.529	ENSRNOG00000059487.1	AABR07045405.1
ENSRNOT00000015946.4	1174	975.767	7281	201.482	ENSRNOG00000011745.4	Psma1	proteasome 20S subunit alpha 1 [Source:RGD Symbol;Acc:61841]
ENSRNOT00000036910.5	4509	4310.77	32158	201.431	ENSRNOG00000018823.7	Nisch	nischarin [Source:RGD Symbol;Acc:1306950]
ENSRNOT00000019707.6	977	778.767	5805	201.273	ENSRNOG00000014633.6	Vps28	VPS28 subunit of ESCRT-I [Source:RGD Symbol;Acc:1306537]
ENSRNOT00000040993.4	1039	840.767	6260	201.043	ENSRNOG00000031033.4	Mt-nd2	mitochondrially encoded NADH dehydrogenase 2 [Source:RGD Symbol;Acc:620556]
ENSRNOT00000017067.7	1195	996.767	7395	200.325	ENSRNOG00000012457.7	Cyc1	cytochrome c-1 [Source:RGD Symbol;Acc:1306597]
ENSRNOT00000012879.3	1338	1139.77	8441	199.972	ENSRNOG00000009513.3	Akr1b1	aldo-keto reductase family 1 member B [Source:RGD Symbol;Acc:2092]
ENSRNOT00000021803.7	741	542.785	4017	199.832	ENSRNOG00000016269.7	Rpl7l1	ribosomal protein L7-like 1 [Source:RGD Symbol;Acc:1308469]
ENSRNOT00000002116.4	909	710.767	5256.57	199.695	ENSRNOG00000001551.4	Atp5pf	ATP synthase peripheral stalk subunit F6 [Source:RGD Symbol;Acc:621376]
ENSRNOT00000019486.4	1777	1578.77	11662	199.456	ENSRNOG00000013977.4	Bzw1	basic leucine zipper and W2 domains 1 [Source:RGD Symbol;Acc:735129]
ENSRNOT00000027739.4	435	240.553	1775	199.241	ENSRNOG00000020467.4	Nrep	neuronal regeneration related protein [Source:RGD Symbol;Acc:631411]
ENSRNOT00000011484.4	517	319.67	2357	199.09	ENSRNOG00000008569.4	Ndufa6	NADH:ubiquinone oxidoreductase subunit A6 [Source:RGD Symbol;Acc:1309818]
ENSRNOT00000023485.4	1353	1154.77	8514	199.081	ENSRNOG00000017416.4	Ppic	peptidylprolyl isomerase C [Source:RGD Symbol;Acc:1303221]
ENSRNOT00000033726.5	1498	1299.77	9577	198.955	ENSRNOG00000023520.5	Cs	citrate synthase [Source:RGD Symbol;Acc:620330]
ENSRNOT00000024609.6	1085	886.767	6532	198.897	ENSRNOG00000018281.6	Uqcrfs1	ubiquinol-cytochrome c reductase, Rieske iron-sulfur polypeptide 1 [Source:RGD Symbol;Acc:628838]
ENSRNOT00000072494.2	660	461.837	3401	198.842	ENSRNOG00000049931.2	LOC288913	similar to LEYDIG CELL TUMOR 10 KD PROTEIN [Source:RGD Symbol;Acc:735128]
ENSRNOT00000044841.6	579	381.111	2804	198.663	ENSRNOG00000059116.1	AABR07035818.1
ENSRNOT00000018499.5	1710	1511.77	11119	198.597	ENSRNOG00000013562.5	Ndfip1	Nedd4 family interacting protein 1 [Source:RGD Symbol;Acc:1310053]
ENSRNOT00000013582.6	1137	938.767	6904	198.579	ENSRNOG00000009982.6	Pnp	purine nucleoside phosphorylase [Source:RGD Symbol;Acc:1597189]
ENSRNOT00000010308.7	1620	1421.77	10389	197.303	ENSRNOG00000007330.7	Capzb	capping actin protein of muscle Z-line subunit beta [Source:RGD Symbol;Acc:1359099]
ENSRNOT00000048529.4	2136	1937.77	14157	197.27	ENSRNOG00000031312.5	Tnfrsf1a	TNF receptor superfamily member 1A [Source:RGD Symbol;Acc:621237]
ENSRNOT00000026792.5	2767	2568.77	18720	196.776	ENSRNOG00000019725.5	Actr1a	actin related protein 1A [Source:RGD Symbol;Acc:1307025]
ENSRNOT00000000334.6	2822	2623.77	19100.2	196.564	ENSRNOG00000000304.7	Cd164	CD164 molecule [Source:RGD Symbol;Acc:70942]
ENSRNOT00000087540.1	1837	1638.77	11923	196.453	ENSRNOG00000057934.1	Tmx1	thioredoxin-related transmembrane protein 1 [Source:RGD Symbol;Acc:1308455]
ENSRNOT00000020707.7	1072	873.767	6349	196.201	ENSRNOG00000025040.6	Gng10	G protein subunit gamma 10 [Source:RGD Symbol;Acc:621514]
ENSRNOT00000048854.6	3388	3189.77	23116.7	195.686	ENSRNOG00000006997.8	App	amyloid beta precursor protein [Source:RGD Symbol;Acc:2139]
ENSRNOT00000025824.6	2128	1929.77	13962.9	195.371	ENSRNOG00000019090.6	Cct3	chaperonin containing TCP1 subunit 3 [Source:RGD Symbol;Acc:735038]
ENSRNOT00000010593.7	980	781.767	5655	195.32	ENSRNOG00000007967.7	Sdhb	succinate dehydrogenase complex iron sulfur subunit B [Source:RGD Symbol;Acc:1308598]
ENSRNOT00000067011.2	881	682.767	4937.05	195.248	ENSRNOG00000003772.7	Csrp2	cysteine and glycine-rich protein 2 [Source:RGD Symbol;Acc:61950]
ENSRNOT00000009431.6	5151	4952.77	35812.4	195.244	ENSRNOG00000006992.6	Rpl7	ribosomal protein L7 [Source:RGD Symbol;Acc:735169]
ENSRNOT00000026153.5	1576	1377.77	9957.99	195.158	ENSRNOG00000019281.5	Glmp	glycosylated lysosomal membrane protein [Source:RGD Symbol;Acc:1303130]
ENSRNOT00000086608.1	824	625.767	4520	195.037	ENSRNOG00000052730.1	Psmb3	proteasome 20S subunit beta 3 [Source:RGD Symbol;Acc:61875]
ENSRNOT00000071885.2	2942	2743.77	19796	194.815	ENSRNOG00000049033.2	Racgap1	Rac GTPase-activating protein 1 [Source:RGD Symbol;Acc:1305912]
ENSRNOT00000046746.3	2945	2746.77	19817.4	194.813	ENSRNOG00000018524.6	Ezr	ezrin [Source:RGD Symbol;Acc:621161]
ENSRNOT00000027834.4	3416	3217.77	23153	194.287	ENSRNOG00000020480.5	Fads1	fatty acid desaturase 1 [Source:RGD Symbol;Acc:621678]
ENSRNOT00000086591.1	1261	1062.77	7637.82	194.054	ENSRNOG00000051482.1	Hmg1l1	high-mobility group (nonhistone chromosomal) protein 1-like 1 [Source:RGD Symbol;Acc:1587112]
ENSRNOT00000017271.3	1705	1506.77	10812	193.754	ENSRNOG00000012640.3	Dpp7	dipeptidylpeptidase 7 [Source:RGD Symbol;Acc:71073]
ENSRNOT00000001570.4	2748	2549.77	18291.4	193.703	ENSRNOG00000001187.5	Oasl	2'-5'-oligoadenylate synthetase-like [Source:RGD Symbol;Acc:1308586]
ENSRNOT00000029996.2	2969	2770.77	19863	193.569	ENSRNOG00000027487.2	Trim28	tripartite motif-containing 28 [Source:RGD Symbol;Acc:620289]
ENSRNOT00000009404.6	2333	2134.77	15296.7	193.481	ENSRNOG00000006462.7	Ero1a	endoplasmic reticulum oxidoreductase 1 alpha [Source:RGD Symbol;Acc:621713]
ENSRNOT00000036666.5	3789	3590.77	25724	193.438	ENSRNOG00000004072.6	Myo1c	myosin 1C [Source:RGD Symbol;Acc:620443]
ENSRNOT00000054955.2	1335	1136.77	8139.24	193.332	ENSRNOG00000036687.3	Alyref	Aly/REF export factor [Source:RGD Symbol;Acc:1594679]
ENSRNOT00000010409.4	1104	905.767	6480	193.174	ENSRNOG00000006331.4	Elovl5	ELOVL fatty acid elongase 5 [Source:RGD Symbol;Acc:620583]
ENSRNOT00000087522.1	880	681.767	4860.12	192.487	ENSRNOG00000020495.7	Eif3k	eukaryotic translation initiation factor 3, subunit K [Source:RGD Symbol;Acc:1309221]
ENSRNOT00000015757.3	1626	1427.77	10175	192.428	ENSRNOG00000011414.5	Psmc3	proteasome 26S subunit, ATPase 3 [Source:RGD Symbol;Acc:61905]
ENSRNOT00000009666.6	960	761.767	5426	192.331	ENSRNOG00000007114.6	Psma6	proteasome 20S subunit alpha 6 [Source:RGD Symbol;Acc:61849]
ENSRNOT00000026297.6	1548	1349.77	9604.98	192.145	ENSRNOG00000042983.2	Nudt21	nudix hydrolase 21 [Source:RGD Symbol;Acc:1305766]
ENSRNOT00000010556.5	1445	1246.77	8872	192.144	ENSRNOG00000007990.5	Adipor2	adiponectin receptor 2 [Source:RGD Symbol;Acc:1307891]
ENSRNOT00000075796.2	3555	3356.77	23841	191.776	ENSRNOG00000047656.2	Gaa	glucosidase, alpha, acid [Source:RGD Symbol;Acc:735227]
ENSRNOT00000014637.6	1920	1721.77	12214.5	191.555	ENSRNOG00000010800.6	Hadhb	hydroxyacyl-CoA dehydrogenase trifunctional multienzyme complex subunit beta [Source:RGD Symbol;Acc:620513]
ENSRNOT00000084202.1	2453	2254.77	15989	191.474	ENSRNOG00000058461.1	Sfpq	splicing factor proline and glutamine rich [Source:RGD Symbol;Acc:727923]
ENSRNOT00000001307.7	834	635.767	4508.04	191.461	ENSRNOG00000000989.8	Bud31	BUD31 homolog [Source:RGD Symbol;Acc:621103]
ENSRNOT00000011183.4	849	650.767	4611	191.32	ENSRNOG00000008329.4	Ndufb11	NADH:ubiquinone oxidoreductase subunit B11 [Source:RGD Symbol;Acc:1563698]
ENSRNOT00000012663.7	1515	1316.77	9317.28	191.061	ENSRNOG00000009113.7	Marcksl1	MARCKS-like 1 [Source:RGD Symbol;Acc:621197]
ENSRNOT00000024020.5	3192	2993.77	21161	190.858	ENSRNOG00000017612.5	Vps35	VPS35 retromer complex component [Source:RGD Symbol;Acc:1589784]
ENSRNOT00000079005.1	798	599.767	4237.22	190.761	ENSRNOG00000060518.1	AABR07015057.1
ENSRNOT00000064744.1	1164	965.767	6808.26	190.351	ENSRNOG00000004616.8	Npm1	nucleophosmin 1 [Source:RGD Symbol;Acc:3192]
ENSRNOT00000064802.3	1084	885.767	6235.07	190.07	ENSRNOG00000019223.8	Atp5f1c	ATP synthase F1 subunit gamma [Source:RGD Symbol;Acc:620011]
ENSRNOT00000001941.3	728	529.804	3720	189.592	ENSRNOG00000001430.3	Polr2j	RNA polymerase II subunit J [Source:RGD Symbol;Acc:1310198]
ENSRNOT00000034583.6	1404	1205.77	8459.54	189.441	ENSRNOG00000002896.7	Prdx6	peroxiredoxin 6 [Source:RGD Symbol;Acc:71005]
ENSRNOT00000008325.2	546	348.305	2432	188.536	ENSRNOG00000005698.2	Ndufa5	NADH:ubiquinone oxidoreductase subunit A5 [Source:RGD Symbol;Acc:3155]
ENSRNOT00000006190.4	2927	2728.77	19051	188.513	ENSRNOG00000004612.4	Ppp1cb	protein phosphatase 1 catalytic subunit beta [Source:RGD Symbol;Acc:3376]
ENSRNOT00000042411.5	1720	1521.77	10613	188.313	ENSRNOG00000008452.7	Eid1	EP300 interacting inhibitor of differentiation 1 [Source:RGD Symbol;Acc:1562702]
ENSRNOT00000014933.5	737	538.804	3757	188.279	ENSRNOG00000010912.5	Mrps25	mitochondrial ribosomal protein S25 [Source:RGD Symbol;Acc:1308770]
ENSRNOT00000010891.6	1605	1406.77	9790.67	187.924	ENSRNOG00000008245.7	AABR07054614.1
ENSRNOT00000020803.4	1492	1293.77	8996.01	187.752	ENSRNOG00000015529.4	Cdca3	cell division cycle associated 3 [Source:RGD Symbol;Acc:1359093]
ENSRNOT00000092993.1	1476	1277.77	8844.22	186.896	ENSRNOG00000019638.7	Lmna	lamin A/C [Source:RGD Symbol;Acc:620456]
ENSRNOT00000084913.1	696	497.821	3441.31	186.656	ENSRNOG00000030174.4	AABR07042903.1
ENSRNOT00000000120.3	1182	983.767	6799	186.614	ENSRNOG00000000108.3	Aga	aspartylglucosaminidase [Source:RGD Symbol;Acc:1309646]
ENSRNOT00000038448.5	1051	852.767	5889.95	186.497	ENSRNOG00000027360.6	Srsf7	serine and arginine rich splicing factor 7 [Source:RGD Symbol;Acc:1307425]
ENSRNOT00000003158.6	1553	1354.77	9346.85	186.291	ENSRNOG00000002292.8	Hnrnpd	heterogeneous nuclear ribonucleoprotein D [Source:RGD Symbol;Acc:620365]
ENSRNOT00000029753.3	1894	1695.77	11699	186.283	ENSRNOG00000005804.6	Eif3d	eukaryotic translation initiation factor 3, subunit D [Source:RGD Symbol;Acc:1303255]
ENSRNOT00000064910.2	4100	3901.77	26908	186.214	ENSRNOG00000001172.7	Rnf10	ring finger protein 10 [Source:RGD Symbol;Acc:1309282]
ENSRNOT00000038340.5	1338	1139.77	7858.01	186.161	ENSRNOG00000027690.5	Eif3el1	eukaryotic translation initiation factor 3, subunit E-like 1 [Source:RGD Symbol;Acc:1311521]
ENSRNOT00000044865.7	2885	2686.77	18458.1	185.502	ENSRNOG00000010448.9	Ptbp1	polypyrimidine tract binding protein 1 [Source:RGD Symbol;Acc:62047]
ENSRNOT00000029177.4	1879	1680.77	11540	185.391	ENSRNOG00000021492.4	Rbbp4	RB binding protein 4, chromatin remodeling factor [Source:RGD Symbol;Acc:1593768]
ENSRNOT00000015019.6	2188	1989.77	13659	185.356	ENSRNOG00000011282.6	Ppp2r1a	protein phosphatase 2 scaffold subunit A alpha [Source:RGD Symbol;Acc:620907]
ENSRNOT00000055970.4	6584	6385.77	43778	185.112	ENSRNOG00000018309.7	Chd4	chromodomain helicase DNA binding protein 4 [Source:RGD Symbol;Acc:620064]
ENSRNOT00000021629.6	2759	2560.77	17549	185.043	ENSRNOG00000016137.6	Rad23b	RAD23 homolog B, nucleotide excision repair protein [Source:RGD Symbol;Acc:1562958]
ENSRNOT00000001679.7	3078	2879.77	19724	184.939	ENSRNOG00000001249.8	Col6a1	collagen type VI alpha 1 chain [Source:RGD Symbol;Acc:1565398]
ENSRNOT00000055583.2	1992	1793.77	12282	184.882	ENSRNOG00000012366.6	Mesd	mesoderm development LRP chaperone [Source:RGD Symbol;Acc:1310344]
ENSRNOT00000085735.1	1687	1488.77	10179	184.615	ENSRNOG00000055471.1	Ywhah	tyrosine 3-monooxygenase/tryptophan 5-monooxygenase activation protein, eta [Source:RGD Symbol;Acc:3978]
ENSRNOT00000019192.6	1566	1367.77	9338	184.346	ENSRNOG00000014117.7	Hmox1	heme oxygenase 1 [Source:RGD Symbol;Acc:2806]
ENSRNOT00000065625.1	539	341.339	2330	184.315	ENSRNOG00000042126.1	Lsm5	LSM5 homolog, U6 small nuclear RNA and mRNA degradation associated [Source:RGD Symbol;Acc:1308655]
ENSRNOT00000082687.1	3503	3304.77	22515	183.959	ENSRNOG00000061108.1	Arcn1	archain 1 [Source:RGD Symbol;Acc:1359110]
ENSRNOT00000088473.1	1426	1227.77	8363.76	183.94	ENSRNOG00000052802.1	Aldoa	aldolase, fructose-bisphosphate A [Source:RGD Symbol;Acc:2089]
ENSRNOT00000090977.1	698	499.821	3399.82	183.668	ENSRNOG00000050473.2	Rps27l	ribosomal protein S27-like [Source:RGD Symbol;Acc:1595396]
ENSRNOT00000045484.4	1398	1199.77	8141	183.22	ENSRNOG00000031085.5	Ergic3	ERGIC and golgi 3 [Source:RGD Symbol;Acc:1308144]
ENSRNOT00000023252.7	2250	2051.77	13920	183.19	ENSRNOG00000017163.7	Pfkp	phosphofructokinase, platelet [Source:RGD Symbol;Acc:61893]
ENSRNOT00000055245.3	2883	2684.77	18182.7	182.87	ENSRNOG00000036816.3	Wls	Wnt ligand secretion mediator [Source:RGD Symbol;Acc:735139]
ENSRNOT00000002510.6	3339	3140.77	21263.7	182.807	ENSRNOG00000001833.6	Mcm4	minichromosome maintenance complex component 4 [Source:RGD Symbol;Acc:3060]
ENSRNOT00000008969.6	1845	1646.77	11144	182.726	ENSRNOG00000006766.6	Laptm4b	lysosomal protein transmembrane 4 beta [Source:RGD Symbol;Acc:1311853]
ENSRNOT00000046399.6	2546	2347.77	15882	182.659	ENSRNOG00000015177.8	Sun2	Sad1 and UNC84 domain containing 2 [Source:RGD Symbol;Acc:1563141]
ENSRNOT00000024083.5	908	709.767	4796	182.455	ENSRNOG00000017851.5	Etfb	electron transfer flavoprotein subunit beta [Source:RGD Symbol;Acc:1303312]
ENSRNOT00000009425.7	474	277.779	1876	182.358	ENSRNOG00000006939.7	Ndufa7	NADH:ubiquinone oxidoreductase subunit A7 [Source:RGD Symbol;Acc:1304597]
ENSRNOT00000021638.7	1779	1580.77	10658	182.053	ENSRNOG00000016161.7	Lman2	lectin, mannose-binding 2 [Source:RGD Symbol;Acc:1308965]
ENSRNOT00000015476.5	1818	1619.77	10918	182.004	ENSRNOG00000011501.5	Atp1b3	ATPase Na+/K+ transporting subunit beta 3 [Source:RGD Symbol;Acc:2172]
ENSRNOT00000012847.3	2110	1911.77	12886	182.001	ENSRNOG00000009642.3	Cct4	chaperonin containing TCP1 subunit 4 [Source:RGD Symbol;Acc:727937]
ENSRNOT00000002429.5	1984	1785.77	12022.8	181.791	ENSRNOG00000001783.6	Tra2b	transformer 2 beta homolog [Source:RGD Symbol;Acc:619886]
ENSRNOT00000002169.6	2521	2322.77	15635	181.754	ENSRNOG00000001592.6	Cct8	chaperonin containing TCP1 subunit 8 [Source:RGD Symbol;Acc:1305452]
ENSRNOT00000015618.6	884	685.767	4613	181.634	ENSRNOG00000011463.6	Psmb2	proteasome 20S subunit beta 2 [Source:RGD Symbol;Acc:61874]
ENSRNOT00000010915.5	1822	1623.77	10921	181.606	ENSRNOG00000008703.6	Rnps1	RNA binding protein with serine rich domain 1 [Source:RGD Symbol;Acc:1307522]
ENSRNOT00000042314.3	1601	1402.77	9424.83	181.417	ENSRNOG00000033426.4	Cdc37	cell division cycle 37 [Source:RGD Symbol;Acc:71006]
ENSRNOT00000024568.5	4168	3969.77	26671.7	181.417	ENSRNOG00000018149.5	Smarca5	SWI/SNF related, matrix associated, actin dependent regulator of chromatin, subfamily a, member 5 [Source:RGD Symbol;Acc:1308832]
ENSRNOT00000021071.6	1838	1639.77	11003	181.184	ENSRNOG00000014637.6	Atxn10	ataxin 10 [Source:RGD Symbol;Acc:621813]
ENSRNOT00000065847.3	1043	844.767	5668	181.169	ENSRNOG00000013712.7	Tex261	testis expressed 261 [Source:RGD Symbol;Acc:1305851]
ENSRNOT00000009870.6	2822	2623.77	17594.6	181.069	ENSRNOG00000006756.8	Maged1	MAGE family member D1 [Source:RGD Symbol;Acc:70898]
ENSRNOT00000091792.1	1201	1002.77	6712	180.735	ENSRNOG00000055756.1	Bcap31	B-cell receptor-associated protein 31 [Source:RGD Symbol;Acc:1302944]
ENSRNOT00000059541.2	422	228.355	1527	180.559	ENSRNOG00000038951.2	Cox17	cytochrome c oxidase copper chaperone COX17 [Source:RGD Symbol;Acc:620548]
ENSRNOT00000011047.7	2073	1874.77	12518.9	180.306	ENSRNOG00000007921.8	Hnrnpm	heterogeneous nuclear ribonucleoprotein M [Source:RGD Symbol;Acc:620369]
ENSRNOT00000079889.1	8412	8213.77	54847	180.302	ENSRNOG00000054890.1	Flna	filamin A [Source:RGD Symbol;Acc:1560614]
ENSRNOT00000005368.7	1638	1439.77	9602.59	180.089	ENSRNOG00000003846.7	Pitpna	phosphatidylinositol transfer protein, alpha [Source:RGD Symbol;Acc:61885]
ENSRNOT00000024648.8	2116	1917.77	12785.2	180.013	ENSRNOG00000017751.8	Arl6ip1	ADP-ribosylation factor like GTPase 6 interacting protein 1 [Source:RGD Symbol;Acc:735205]
ENSRNOT00000013359.6	492	295.224	1967	179.905	ENSRNOG00000010029.6	Ubald2	UBA-like domain containing 2 [Source:RGD Symbol;Acc:1311298]
ENSRNOT00000025763.6	2542	2343.77	15615.7	179.903	ENSRNOG00000019018.6	Plat	plasminogen activator, tissue type [Source:RGD Symbol;Acc:3342]
ENSRNOT00000027944.6	1550	1351.77	9003	179.836	ENSRNOG00000020583.7	Fcgrt	Fc fragment of IgG receptor and transporter [Source:RGD Symbol;Acc:61811]
ENSRNOT00000012376.4	5669	5470.77	36431	179.81	ENSRNOG00000009275.4	Kpnb1	karyopherin subunit beta 1 [Source:RGD Symbol;Acc:2909]
ENSRNOT00000013747.4	1788	1589.77	10570	179.528	ENSRNOG00000010252.4	Hexa	hexosaminidase subunit alpha [Source:RGD Symbol;Acc:2792]
ENSRNOT00000005837.4	873	674.767	4460.03	178.474	ENSRNOG00000024170.5	Phf5a	PHD finger protein 5A [Source:RGD Symbol;Acc:621555]
ENSRNOT00000026075.4	1758	1559.77	10303	178.359	ENSRNOG00000019211.4	Olfml3	olfactomedin-like 3 [Source:RGD Symbol;Acc:1311106]
ENSRNOT00000019104.6	1564	1365.77	9012	178.17	ENSRNOG00000014097.6	Psmd7	proteasome 26S subunit, non-ATPase 7 [Source:RGD Symbol;Acc:1306902]
ENSRNOT00000047669.5	3041	2842.77	18752.9	178.122	ENSRNOG00000050994.3	Cttn	cortactin [Source:RGD Symbol;Acc:619839]
ENSRNOT00000039729.4	1501	1302.77	8566.68	177.557	ENSRNOG00000023850.4	Tbrg1	transforming growth factor beta regulator 1 [Source:RGD Symbol;Acc:1305123]
ENSRNOT00000026928.7	1009	810.767	5324	177.31	ENSRNOG00000019868.7	Psma5	proteasome 20S subunit alpha 5 [Source:RGD Symbol;Acc:61848]
ENSRNOT00000064090.2	363	174.976	1149	177.31	ENSRNOG00000020427.7	Borcs8	BLOC-1 related complex subunit 8 [Source:RGD Symbol;Acc:1582941]
ENSRNOT00000064272.3	1062	863.767	5666.79	177.146	ENSRNOG00000026109.6	Prmt1	protein arginine methyltransferase 1 [Source:RGD Symbol;Acc:62020]
ENSRNOT00000080410.1	2497	2298.77	15077.6	177.104	ENSRNOG00000015514.7	Bcat1	branched chain amino acid transaminase 1 [Source:RGD Symbol;Acc:2195]
ENSRNOT00000056600.2	486	289.39	1894	176.721	ENSRNOG00000037402.2	Cops9	COP9 signalosome subunit 9 [Source:RGD Symbol;Acc:1596701]
ENSRNOT00000014377.4	1267	1068.77	6985	176.471	ENSRNOG00000010628.4	Sec13	SEC13 homolog, nuclear pore and COPII coat complex component [Source:RGD Symbol;Acc:1359555]
ENSRNOT00000007427.8	1834	1635.77	10690.5	176.469	ENSRNOG00000005480.8	Ybx3	Y box binding protein 3 [Source:RGD Symbol;Acc:621056]
ENSRNOT00000004884.5	1512	1313.77	8582	176.385	ENSRNOG00000003674.5	Pir	pirin [Source:RGD Symbol;Acc:1359212]
ENSRNOT00000006578.5	1573	1374.77	8980	176.376	ENSRNOG00000004904.5	Pa2g4	proliferation-associated 2G4 [Source:RGD Symbol;Acc:1302994]
ENSRNOT00000078429.1	2752	2553.77	16677.7	176.338	ENSRNOG00000060005.1	Surf4	surfeit 4 [Source:RGD Symbol;Acc:1561980]
ENSRNOT00000030344.4	1875	1676.77	10942	176.204	ENSRNOG00000018568.6	Rab5c	RAB5C, member RAS oncogene family [Source:RGD Symbol;Acc:1307095]
ENSRNOT00000037072.4	1453	1254.77	8168	175.77	ENSRNOG00000021316.4	Tmem98	transmembrane protein 98 [Source:RGD Symbol;Acc:1359736]
ENSRNOT00000076548.2	1700	1501.77	9774	175.736	ENSRNOG00000009878.7	Crtapl1	cartilage associated protein-like 1 [Source:RGD Symbol;Acc:1565180]
ENSRNOT00000018447.5	4475	4276.77	27760.9	175.27	ENSRNOG00000013552.6	Scd	stearoyl-CoA desaturase [Source:RGD Symbol;Acc:621176]
ENSRNOT00000039002.3	4635	4436.77	28763	175.049	ENSRNOG00000006305.5	Slc38a2	solute carrier family 38, member 2 [Source:RGD Symbol;Acc:69420]
ENSRNOT00000006355.5	1147	948.767	6148	174.971	ENSRNOG00000004791.5	Arf6	ADP-ribosylation factor 6 [Source:RGD Symbol;Acc:621279]
ENSRNOT00000004228.5	1148	949.767	6146	174.73	ENSRNOG00000003163.5	Sdhc	succinate dehydrogenase complex subunit C [Source:RGD Symbol;Acc:1359454]
ENSRNOT00000016851.5	878	679.767	4388.17	174.307	ENSRNOG00000028746.6	Gsto1	glutathione S-transferase omega 1 [Source:RGD Symbol;Acc:70952]
ENSRNOT00000020443.6	1040	841.767	5415.26	173.708	ENSRNOG00000014846.6	Anp32a	acidic nuclear phosphoprotein 32 family member A [Source:RGD Symbol;Acc:11508551]
ENSRNOT00000064851.3	3282	3083.77	19816	173.51	ENSRNOG00000007518.7	Nckap1	NCK-associated protein 1 [Source:RGD Symbol;Acc:61939]
ENSRNOT00000029279.4	605	406.968	2612.72	173.35	ENSRNOG00000027028.4	Lamtor4	late endosomal/lysosomal adaptor, MAPK and MTOR activator 4 [Source:RGD Symbol;Acc:1309735]
ENSRNOT00000073846.1	759	560.785	3594	173.05	ENSRNOG00000046109.1	LOC689574	hypothetical protein LOC689574 [Source:RGD Symbol;Acc:1591053]
ENSRNOT00000060980.3	1608	1409.77	9025.54	172.869	ENSRNOG00000000723.7	RT1-CE5	RT1 class I, locus CE5 [Source:RGD Symbol;Acc:1595868]
ENSRNOT00000026021.4	1181	982.767	6290.74	172.839	ENSRNOG00000019229.4	Fbl	fibrillarin [Source:RGD Symbol;Acc:1305542]
ENSRNOT00000001890.7	1003	804.767	5150	172.794	ENSRNOG00000001396.7	Mospd3	motile sperm domain containing 3 [Source:RGD Symbol;Acc:1304973]
ENSRNOT00000019656.4	2902	2703.77	17256	172.33	ENSRNOG00000014647.5	Cbfb	core-binding factor subunit beta [Source:RGD Symbol;Acc:620493]
ENSRNOT00000058947.4	1878	1679.77	10717	172.272	ENSRNOG00000027331.6	Ppef1	protein phosphatase with EF-hand domain 1 [Source:RGD Symbol;Acc:1562772]
ENSRNOT00000081914.1	2203	2004.77	12773	172.036	ENSRNOG00000054352.1	Atp6ap1	ATPase H+ transporting accessory protein 1 [Source:RGD Symbol;Acc:620423]
ENSRNOT00000004520.6	2089	1890.77	12041.3	171.959	ENSRNOG00000003206.7	Actr3	actin related protein 3 [Source:RGD Symbol;Acc:71024]
ENSRNOT00000038807.5	1890	1691.77	10768	171.864	ENSRNOG00000028017.5	Tmem109	transmembrane protein 109 [Source:RGD Symbol;Acc:1359538]
ENSRNOT00000012233.5	862	663.767	4209	171.22	ENSRNOG00000009090.5	Dad1	defender against cell death 1 [Source:RGD Symbol;Acc:621028]
ENSRNOT00000023477.6	1618	1419.77	8995.78	171.085	ENSRNOG00000017243.6	Bnip3	BCL2 interacting protein 3 [Source:RGD Symbol;Acc:620800]
ENSRNOT00000031951.4	1611	1412.77	8951	171.077	ENSRNOG00000023410.4	Apol9a	apolipoprotein L 9a [Source:RGD Symbol;Acc:1562332]
ENSRNOT00000004862.5	1384	1185.77	7506	170.923	ENSRNOG00000003661.6	Jpt1	Jupiter microtubule associated homolog 1 [Source:RGD Symbol;Acc:1359325]
ENSRNOT00000092282.1	845	646.767	4093.28	170.889	ENSRNOG00000018320.6	Rps15a	ribosomal protein S15a [Source:RGD Symbol;Acc:619939]
ENSRNOT00000055602.5	4668	4469.77	28221	170.482	ENSRNOG00000005958.8	Rrbp1	ribosome binding protein 1 [Source:RGD Symbol;Acc:1306536]
ENSRNOT00000022532.6	2232	2033.77	12818	170.181	ENSRNOG00000016704.6	Pcyox1	prenylcysteine oxidase 1 [Source:RGD Symbol;Acc:628652]
ENSRNOT00000042114.4	1615	1416.77	8893	169.489	ENSRNOG00000032134.4	Uqcrc1	ubiquinol-cytochrome c reductase core protein 1 [Source:RGD Symbol;Acc:1303314]
ENSRNOT00000022029.6	2559	2360.77	14776.1	169.004	ENSRNOG00000015941.8	Fkbp10	FKBP prolyl isomerase 10 [Source:RGD Symbol;Acc:1549751]
ENSRNOT00000083067.1	2427	2228.77	13947.4	168.974	ENSRNOG00000001963.7	Mx2	MX dynamin like GTPase 2 [Source:RGD Symbol;Acc:628821]
ENSRNOT00000029456.5	2017	1818.77	11370	168.801	ENSRNOG00000021638.6	Eef1d	eukaryotic translation elongation factor 1 delta [Source:RGD Symbol;Acc:621174]
ENSRNOT00000005329.6	1614	1415.77	8846	168.712	ENSRNOG00000003951.6	Psmc1	proteasome 26S subunit, ATPase 1 [Source:RGD Symbol;Acc:621097]
ENSRNOT00000075400.2	707	508.821	3177	168.594	ENSRNOG00000050231.2	Gng12	G protein subunit gamma 12 [Source:RGD Symbol;Acc:621516]
ENSRNOT00000086264.1	1603	1404.77	8771.06	168.593	ENSRNOG00000017558.6	Tubb2a	tubulin, beta 2A class IIa [Source:RGD Symbol;Acc:1588452]
ENSRNOT00000073140.2	1500	1301.77	8119	168.407	ENSRNOG00000045791.2	Eif4a3	eukaryotic translation initiation factor 4A3 [Source:RGD Symbol;Acc:1591139]
ENSRNOT00000026921.6	1299	1100.77	6859.95	168.274	ENSRNOG00000019798.6	Stub1	STIP1 homology and U-box containing protein 1 [Source:RGD Symbol;Acc:1306167]
ENSRNOT00000088846.1	384	193.465	1204	168.041	ENSRNOG00000061857.1	Mgst2	microsomal glutathione S-transferase 2 [Source:RGD Symbol;Acc:1311218]
ENSRNOT00000078250.1	2558	2359.77	14681	167.988	ENSRNOG00000056836.1	Cav1	caveolin 1 [Source:RGD Symbol;Acc:2280]
ENSRNOT00000001035.4	1810	1611.77	10026.4	167.97	ENSRNOG00000000795.4	RT1-N3	RT1 class Ib, locus N3 [Source:RGD Symbol;Acc:1598370]
ENSRNOT00000009923.6	2226	2027.77	12602.1	167.809	ENSRNOG00000007134.6	Strap	serine/threonine kinase receptor associated protein [Source:RGD Symbol;Acc:1311114]
ENSRNOT00000004941.4	2802	2603.77	16176.6	167.756	ENSRNOG00000003524.4	Lrrc59	leucine rich repeat containing 59 [Source:RGD Symbol;Acc:1305092]
ENSRNOT00000016495.6	1331	1132.77	7020	167.335	ENSRNOG00000011905.6	Atp6v1e1	ATPase H+ transporting V1 subunit E1 [Source:RGD Symbol;Acc:735157]
ENSRNOT00000018005.7	873	674.767	4180	167.268	ENSRNOG00000013386.7	Psmb5	proteasome 20S subunit beta 5 [Source:RGD Symbol;Acc:61879]
ENSRNOT00000052393.2	1036	837.767	5181.85	167.014	ENSRNOG00000034071.2	Chmp4bl1	chromatin modifying protein 4B-like 1 [Source:RGD Symbol;Acc:1583604]
ENSRNOT00000074253.1	2955	2756.77	17009	166.598	ENSRNOG00000046502.1	Lonp1	lon peptidase 1, mitochondrial [Source:RGD Symbol;Acc:621598]
ENSRNOT00000007698.6	1241	1042.77	6431	166.526	ENSRNOG00000005615.6	Gadd45a	growth arrest and DNA-damage-inducible, alpha [Source:RGD Symbol;Acc:2654]
ENSRNOT00000086096.1	2077	1878.77	11549.4	165.988	ENSRNOG00000036677.4	Slc16a3	solute carrier family 16 member 3 [Source:RGD Symbol;Acc:620603]
ENSRNOT00000077756.1	1651	1452.77	8926	165.902	ENSRNOG00000058359.1	Fkbp8	FKBP prolyl isomerase 8 [Source:RGD Symbol;Acc:1308670]
ENSRNOT00000018646.5	832	633.767	3893	165.862	ENSRNOG00000013714.5	Snrpd1	small nuclear ribonucleoprotein D1 polypeptide [Source:RGD Symbol;Acc:1306345]
ENSRNOT00000037699.3	3137	2938.77	18026	165.625	ENSRNOG00000023910.3	Man2b1	mannosidase, alpha, class 2B, member 1 [Source:RGD Symbol;Acc:3039]
ENSRNOT00000086091.1	1418	1219.77	7481.42	165.614	ENSRNOG00000016831.6	Serpinh1	serpin family H member 1 [Source:RGD Symbol;Acc:69302]
ENSRNOT00000072098.2	5627	5428.77	33295.1	165.604	ENSRNOG00000047768.2	Lamb2	laminin subunit beta 2 [Source:RGD Symbol;Acc:2988]
ENSRNOT00000018796.4	1827	1628.77	9968	165.25	ENSRNOG00000014051.4	Pgrmc2	progesterone receptor membrane component 2 [Source:RGD Symbol;Acc:1308804]
ENSRNOT00000087731.1	639	440.896	2692.99	164.926	ENSRNOG00000054978.1	H1f2	H1.2 linker histone, cluster member [Source:RGD Symbol;Acc:1587893]
ENSRNOT00000014887.5	1427	1228.77	7490.08	164.592	ENSRNOG00000023830.4	Dnase2	deoxyribonuclease 2, lysosomal [Source:RGD Symbol;Acc:621457]
ENSRNOT00000030340.6	909	710.767	4327.43	164.397	ENSRNOG00000022153.6	Tmem134	transmembrane protein 134 [Source:RGD Symbol;Acc:1305824]
ENSRNOT00000025559.5	1842	1643.77	9992	164.136	ENSRNOG00000018796.5	Herpud1	homocysteine inducible ER protein with ubiquitin like domain 1 [Source:RGD Symbol;Acc:620818]
ENSRNOT00000003658.2	736	537.804	3266	163.977	ENSRNOG00000002693.2	Nme1	NME/NM23 nucleoside diphosphate kinase 1 [Source:RGD Symbol;Acc:70497]
ENSRNOT00000027693.2	1442	1243.77	7553	163.973	ENSRNOG00000020385.3	Fads3	fatty acid desaturase 3 [Source:RGD Symbol;Acc:628876]
ENSRNOT00000086175.1	1346	1147.77	6968	163.925	ENSRNOG00000000893.6	Tmem248	transmembrane protein 248 [Source:RGD Symbol;Acc:1303319]
ENSRNOT00000050063.3	1594	1395.77	8473.51	163.924	ENSRNOG00000019542.5	MGC108823	similar to interferon-inducible GTPase [Source:RGD Symbol;Acc:1359421]
ENSRNOT00000086441.1	1020	821.767	4987.05	163.865	ENSRNOG00000048297.3	LOC108348175	protein quaking-like [Source:RGD Symbol;Acc:11514364]
ENSRNOT00000085981.1	971	772.767	4684.34	163.678	ENSRNOG00000011732.7	Psmb7	proteasome 20S subunit beta 7 [Source:RGD Symbol;Acc:621093]
ENSRNOT00000041717.4	2220	2021.77	12254	163.658	ENSRNOG00000005257.7	Prkaca	protein kinase cAMP-activated catalytic subunit alpha [Source:RGD Symbol;Acc:3389]
ENSRNOT00000083016.1	4170	3971.77	24049	163.495	ENSRNOG00000055300.1	Ncapd2	non-SMC condensin I complex, subunit D2 [Source:RGD Symbol;Acc:1562596]
ENSRNOT00000088442.1	2097	1898.77	11486.6	163.346	ENSRNOG00000051480.1	Fxr1	FMR1 autosomal homolog 1 [Source:RGD Symbol;Acc:1311733]
ENSRNOT00000065270.2	2340	2141.77	12936	163.087	ENSRNOG00000036835.4	Copz1	coatomer protein complex, subunit zeta 1 [Source:RGD Symbol;Acc:1306154]
ENSRNOT00000089016.1	2411	2212.77	13354	162.955	ENSRNOG00000059463.1	Slc39a1	solute carrier family 39 member 1 [Source:RGD Symbol;Acc:1305241]
ENSRNOT00000008518.5	4432	4233.77	25515	162.727	ENSRNOG00000006247.7	Copa	coatomer protein complex subunit alpha [Source:RGD Symbol;Acc:1310525]
ENSRNOT00000023495.4	844	645.767	3888.52	162.592	ENSRNOG00000017144.4	Mea1	male-enhanced antigen 1 [Source:RGD Symbol;Acc:1597751]
ENSRNOT00000056199.2	1454	1255.77	7536.21	162.045	ENSRNOG00000020667.7	Shisa5	shisa family member 5 [Source:RGD Symbol;Acc:1359661]
ENSRNOT00000021162.6	5812	5613.77	33646	161.834	ENSRNOG00000015655.6	Ptgfrn	prostaglandin F2 receptor inhibitor [Source:RGD Symbol;Acc:3437]
ENSRNOT00000072434.2	1642	1443.77	8640.48	161.596	ENSRNOG00000046094.2	Cd151	CD151 molecule (Raph blood group) [Source:RGD Symbol;Acc:621290]
ENSRNOT00000074341.2	201	53.9878	323	161.547	ENSRNOG00000047019.2	Bbip1	BBSome interacting protein 1 [Source:RGD Symbol;Acc:6498801]
ENSRNOT00000021156.6	1712	1513.77	9055.35	161.524	ENSRNOG00000015423.7	Ccna2	cyclin A2 [Source:RGD Symbol;Acc:621059]
ENSRNOT00000056405.2	2504	2305.77	13788.5	161.47	ENSRNOG00000004742.5	Chp1	calcineurin-like EF-hand protein 1 [Source:RGD Symbol;Acc:620447]
ENSRNOT00000015575.7	1346	1147.77	6863	161.455	ENSRNOG00000010727.7	Ube2r2	ubiquitin-conjugating enzyme E2R 2 [Source:RGD Symbol;Acc:1594826]
ENSRNOT00000072870.2	498	301.074	1800	161.432	ENSRNOG00000046883.2	Mydgf	myeloid-derived growth factor [Source:RGD Symbol;Acc:1589603]
ENSRNOT00000016220.6	2288	2089.77	12493	161.421	ENSRNOG00000011798.6	Mapre1	microtubule-associated protein, RP/EB family, member 1 [Source:RGD Symbol;Acc:621781]
ENSRNOT00000061114.5	1753	1554.77	9285.62	161.264	ENSRNOG00000031090.6	RT1-CE7	RT1 class I, locus CE7 [Source:RGD Symbol;Acc:1595786]
ENSRNOT00000001989.4	1526	1327.77	7925	161.164	ENSRNOG00000001457.5	Rfc2	replication factor C subunit 2 [Source:RGD Symbol;Acc:621198]
ENSRNOT00000009009.5	1640	1441.77	8590	160.875	ENSRNOG00000006619.5	Dnajc9	DnaJ heat shock protein family (Hsp40) member C9 [Source:RGD Symbol;Acc:1305009]
ENSRNOT00000023854.6	4506	4307.77	25663	160.859	ENSRNOG00000017724.6	Sf3b3	splicing factor 3b, subunit 3 [Source:RGD Symbol;Acc:1311636]
ENSRNOT00000091297.1	3408	3209.77	19115.4	160.805	ENSRNOG00000015267.6	LOC108348083	delta-1-pyrroline-5-carboxylate synthase [Source:RGD Symbol;Acc:11512751]
ENSRNOT00000026949.5	3760	3561.77	21203.3	160.742	ENSRNOG00000019875.6	Matr3	matrin 3 [Source:RGD Symbol;Acc:3052]
ENSRNOT00000010079.4	2070	1871.77	11121.5	160.436	ENSRNOG00000007546.6	Asns	asparagine synthetase (glutamine-hydrolyzing) [Source:RGD Symbol;Acc:2162]
ENSRNOT00000018073.7	3800	3601.77	21383.9	160.311	ENSRNOG00000013039.8	Add1	adducin 1 [Source:RGD Symbol;Acc:2041]
ENSRNOT00000014859.8	3294	3095.77	18367.8	160.206	ENSRNOG00000010989.8	Ipo5	importin 5 [Source:RGD Symbol;Acc:1308715]
ENSRNOT00000028100.7	3746	3547.77	21032	160.072	ENSRNOG00000020683.7	Hnrnpul1	heterogeneous nuclear ribonucleoprotein U-like 1 [Source:RGD Symbol;Acc:1307456]
ENSRNOT00000086275.1	1484	1285.77	7621	160.045	ENSRNOG00000055111.1	AABR07000658.2	cyclin B2-like [Source:NCBI gene;Acc:100364016]
ENSRNOT00000076772.2	1105	906.767	5374.47	160.041	ENSRNOG00000014445.7	Hp1bp3	heterochromatin protein 1, binding protein 3 [Source:RGD Symbol;Acc:735099]
ENSRNOT00000015495.5	3961	3762.77	22284	159.91	ENSRNOG00000011339.6	Slk	STE20-like kinase [Source:RGD Symbol;Acc:3780]
ENSRNOT00000084509.1	1962	1763.77	10438	159.797	ENSRNOG00000054891.1	Cnot6	CCR4-NOT transcription complex, subunit 6 [Source:RGD Symbol;Acc:1310783]
ENSRNOT00000039186.3	1456	1257.77	7441.4	159.752	ENSRNOG00000025940.3	Mettl9	methyltransferase like 9 [Source:RGD Symbol;Acc:2311609]
ENSRNOT00000002114.6	2307	2108.77	12460	159.544	ENSRNOG00000001548.6	Nfe2l2	nuclear factor, erythroid 2-like 2 [Source:RGD Symbol;Acc:620360]
ENSRNOT00000022000.4	1471	1272.77	7514	159.409	ENSRNOG00000016166.4	Pdlim1	PDZ and LIM domain 1 [Source:RGD Symbol;Acc:68324]
ENSRNOT00000007821.5	3004	2805.77	16556	159.329	ENSRNOG00000005478.5	Fkbp9	FKBP prolyl isomerase 9 [Source:RGD Symbol;Acc:1549757]
ENSRNOT00000013852.4	1603	1404.77	8259	158.75	ENSRNOG00000032436.2	Tmod3	tropomodulin 3 [Source:RGD Symbol;Acc:1311030]
ENSRNOT00000013931.5	4241	4042.77	23738	158.546	ENSRNOG00000010274.5	Smc4	structural maintenance of chromosomes 4 [Source:RGD Symbol;Acc:1306680]
ENSRNOT00000084293.1	699	500.821	2938.05	158.405	ENSRNOG00000059837.1	Cdkn2a	cyclin-dependent kinase inhibitor 2A [Source:RGD Symbol;Acc:2323]
ENSRNOT00000001338.3	786	587.767	3445	158.262	ENSRNOG00000021705.3	LOC102556092	uncharacterized LOC102556092 [Source:RGD Symbol;Acc:7677226]
ENSRNOT00000007351.5	849	650.767	3807.98	158.001	ENSRNOG00000005556.5	Snrpf	small nuclear ribonucleoprotein polypeptide F [Source:RGD Symbol;Acc:1588229]
ENSRNOT00000008508.7	4122	3923.77	22938.7	157.854	ENSRNOG00000025604.5	Atad2	ATPase family, AAA domain containing 2 [Source:RGD Symbol;Acc:1304849]
ENSRNOT00000044222.4	519	321.627	1877.34	157.609	ENSRNOG00000033517.4	LOC100360791	tumor protein, translationally-controlled 1 [Source:RGD Symbol;Acc:2321467]
ENSRNOT00000072795.2	466	270.017	1575.52	157.552	ENSRNOG00000060344.1	AABR07073045.1	40S ribosomal protein S25-like [Source:NCBI gene;Acc:100911371]
ENSRNOT00000018169.5	1056	857.767	5004.72	157.544	ENSRNOG00000013545.7	Polr2e	RNA polymerase II subunit E [Source:RGD Symbol;Acc:1589817]
ENSRNOT00000031115.4	3602	3403.77	19853	157.492	ENSRNOG00000019164.7	Uba1	ubiquitin-like modifier activating enzyme 1 [Source:RGD Symbol;Acc:1359327]
ENSRNOT00000018336.4	2277	2078.77	12119	157.417	ENSRNOG00000013331.5	Sdha	succinate dehydrogenase complex flavoprotein subunit A [Source:RGD Symbol;Acc:621557]
ENSRNOT00000045384.5	865	666.767	3887	157.41	ENSRNOG00000029862.5	Spc24	SPC24 component of NDC80 kinetochore complex [Source:RGD Symbol;Acc:1307631]
ENSRNOT00000023526.5	748	549.785	3204	157.359	ENSRNOG00000017446.5	Ndufs8	NADH:ubiquinone oxidoreductase core subunit S8 [Source:RGD Symbol;Acc:1309436]
ENSRNOT00000017081.7	2932	2733.77	15931	157.352	ENSRNOG00000012543.7	Mcm3	minichromosome maintenance complex component 3 [Source:RGD Symbol;Acc:1305168]
ENSRNOT00000067203.3	1904	1705.77	9928	157.157	ENSRNOG00000008593.7	Ryk	receptor-like tyrosine kinase [Source:RGD Symbol;Acc:620549]
ENSRNOT00000017555.5	1705	1506.77	8745	156.713	ENSRNOG00000013023.5	Nop53	NOP53 ribosome biogenesis factor [Source:RGD Symbol;Acc:1303085]
ENSRNOT00000055464.4	914	715.767	4154	156.706	ENSRNOG00000009225.7	Copz2	coatomer protein complex, subunit zeta 2 [Source:RGD Symbol;Acc:1306948]
ENSRNOT00000086019.1	1422	1223.77	7088	156.393	ENSRNOG00000055082.1	Maz	MYC associated zinc finger protein [Source:RGD Symbol;Acc:1594632]
ENSRNOT00000030373.4	758	559.785	3242	156.38	ENSRNOG00000027502.4	Nmi	N-myc (and STAT) interactor [Source:RGD Symbol;Acc:1311721]
ENSRNOT00000019465.7	4085	3886.77	22503.3	156.332	ENSRNOG00000014079.7	Stat1	signal transducer and activator of transcription 1 [Source:RGD Symbol;Acc:3771]
ENSRNOT00000010674.5	2433	2234.77	12935	156.288	ENSRNOG00000007213.5	Yars1	tyrosyl-tRNA synthetase 1 [Source:RGD Symbol;Acc:1307616]
ENSRNOT00000048848.3	1283	1084.77	6269.86	156.068	ENSRNOG00000003076.7	Rbms2	RNA binding motif, single stranded interacting protein 2 [Source:RGD Symbol;Acc:1304813]
ENSRNOT00000085470.1	2001	1802.77	10402.1	155.801	ENSRNOG00000017251.6	Wdr55	WD repeat domain 55 [Source:RGD Symbol;Acc:1305640]
ENSRNOT00000087886.1	3895	3696.77	21319	155.717	ENSRNOG00000015173.7	Mbtps1	membrane-bound transcription factor peptidase, site 1 [Source:RGD Symbol;Acc:70935]
ENSRNOT00000059715.2	1330	1131.77	6522.8	155.621	ENSRNOG00000010386.4	H2ax	H2A.X variant histone [Source:RGD Symbol;Acc:1566119]
ENSRNOT00000083633.1	4970	4771.77	27482.4	155.513	ENSRNOG00000031709.5	Ppfibp1	PPFIA binding protein 1 [Source:RGD Symbol;Acc:1310010]
ENSRNOT00000019799.6	3053	2854.77	16432	155.421	ENSRNOG00000014193.6	Lig1	DNA ligase 1 [Source:RGD Symbol;Acc:621424]
ENSRNOT00000014997.5	240	78.9438	454	155.285	ENSRNOG00000011279.5	Cmc2	C-x(9)-C motif containing 2 [Source:RGD Symbol;Acc:2324599]
ENSRNOT00000000529.6	2944	2745.77	15771.9	155.1	ENSRNOG00000000457.6	Tap1	transporter 1, ATP binding cassette subfamily B member [Source:RGD Symbol;Acc:3817]
ENSRNOT00000005522.7	3499	3300.77	18954.7	155.057	ENSRNOG00000004132.7	Lasp1	LIM and SH3 protein 1 [Source:RGD Symbol;Acc:68408]
ENSRNOT00000038395.4	1754	1555.77	8901.44	154.492	ENSRNOG00000021725.5	Unc119b	unc-119 lipid binding chaperone B [Source:RGD Symbol;Acc:1309359]
ENSRNOT00000090451.1	2303	2104.77	12031.8	154.354	ENSRNOG00000056207.1	Capza2	capping actin protein of muscle Z-line subunit alpha 2 [Source:RGD Symbol;Acc:1549770]
ENSRNOT00000013933.6	2004	1805.77	10311	154.181	ENSRNOG00000010176.6	Map2k1	mitogen activated protein kinase kinase 1 [Source:RGD Symbol;Acc:70495]
ENSRNOT00000012611.5	2057	1858.77	10603.3	154.031	ENSRNOG00000009355.6	Ogfr	opioid growth factor receptor [Source:RGD Symbol;Acc:69324]
ENSRNOT00000049255.3	1019	820.767	4679.33	153.941	ENSRNOG00000000340.7	Rtraf	RNA transcription, translation and transport factor [Source:RGD Symbol;Acc:1304704]
ENSRNOT00000001539.4	1096	897.767	5116	153.871	ENSRNOG00000001163.4	Srsf9	serine and arginine rich splicing factor 9 [Source:RGD Symbol;Acc:1309495]
ENSRNOT00000000650.6	1045	846.767	4820	153.7	ENSRNOG00000000541.6	Glo1	glyoxalase 1 [Source:RGD Symbol;Acc:2702]
ENSRNOT00000073258.2	816	617.767	3514	153.592	ENSRNOG00000045698.2	Lin7c	lin-7 homolog C, crumbs cell polarity complex component [Source:RGD Symbol;Acc:621164]
ENSRNOT00000066892.4	816	617.767	3510.44	153.436	ENSRNOG00000000665.7	Pitpnb	phosphatidylinositol transfer protein, beta [Source:RGD Symbol;Acc:620143]
ENSRNOT00000010197.5	1632	1433.77	8146.73	153.425	ENSRNOG00000007648.5	Rab11b	RAB11B, member RAS oncogene family [Source:RGD Symbol;Acc:68369]
ENSRNOT00000070851.1	192	48.8258	277.214	153.305	ENSRNOG00000046450.1	AABR07032904.1
ENSRNOT00000003052.6	2146	1947.77	11019	152.755	ENSRNOG00000002225.6	Scarb2	scavenger receptor class B, member 2 [Source:RGD Symbol;Acc:621882]
ENSRNOT00000025916.5	2563	2364.77	13376.9	152.742	ENSRNOG00000019113.7	Hnrnpk	heterogeneous nuclear ribonucleoprotein K [Source:RGD Symbol;Acc:71058]
ENSRNOT00000073599.3	636	437.911	2475.99	152.67	ENSRNOG00000045647.3	Hax1	HCLS1 associated protein X-1 [Source:RGD Symbol;Acc:727960]
ENSRNOT00000057222.2	669	470.837	2661.96	152.659	ENSRNOG00000011494.4	Rpl36a	ribosomal protein L36a [Source:RGD Symbol;Acc:1306640]
ENSRNOT00000017794.5	643	444.896	2514	152.58	ENSRNOG00000012985.5	Pfdn5	prefoldin subunit 5 [Source:RGD Symbol;Acc:1311436]
ENSRNOT00000025767.6	588	390.047	2203.72	152.556	ENSRNOG00000018881.6	Rnasek	ribonuclease K [Source:RGD Symbol;Acc:1305687]
ENSRNOT00000024413.6	1074	875.767	4938	152.249	ENSRNOG00000017949.6	Mvb12a	multivesicular body subunit 12A [Source:RGD Symbol;Acc:735220]
ENSRNOT00000058423.4	1607	1408.77	7932	152.032	ENSRNOG00000038372.4	Ndufs2	NADH:ubiquinone oxidoreductase core subunit S2 [Source:RGD Symbol;Acc:1307109]
ENSRNOT00000002484.6	1879	1680.77	9462.06	152.009	ENSRNOG00000001815.6	Eif4a2	eukaryotic translation initiation factor 4A2 [Source:RGD Symbol;Acc:1309225]
ENSRNOT00000056243.4	1531	1332.77	7500	151.949	ENSRNOG00000037225.4	Tyms	thymidylate synthetase [Source:RGD Symbol;Acc:3921]
ENSRNOT00000061432.4	2337	2138.77	12034	151.928	ENSRNOG00000039976.4	Ptk7	protein tyrosine kinase 7 [Source:RGD Symbol;Acc:1310472]
ENSRNOT00000021096.6	1779	1580.77	8892	151.888	ENSRNOG00000042195.3	Pabpn1	poly(A) binding protein, nuclear 1 [Source:RGD Symbol;Acc:619928]
ENSRNOT00000022419.4	1614	1415.77	7962	151.852	ENSRNOG00000016474.6	Tspan3	tetraspanin 3 [Source:RGD Symbol;Acc:1359444]
ENSRNOT00000084114.1	2294	2095.77	11785	151.837	ENSRNOG00000060956.1	Zfp706	zinc finger protein 706 [Source:RGD Symbol;Acc:1563959]
ENSRNOT00000016981.6	2691	2492.77	14011	151.767	ENSRNOG00000010945.6	Ywhab	tyrosine 3-monooxygenase/tryptophan 5-monooxygenase activation protein, beta [Source:RGD Symbol;Acc:61998]
ENSRNOT00000017268.5	3129	2930.77	16467	151.714	ENSRNOG00000012911.5	Erlin1	ER lipid raft associated 1 [Source:RGD Symbol;Acc:1307058]
ENSRNOT00000065464.2	1235	1036.77	5821	151.603	ENSRNOG00000004526.7	Cox7a2l	cytochrome c oxidase subunit 7A2 like [Source:RGD Symbol;Acc:1306111]
ENSRNOT00000046159.4	2631	2432.77	13647	151.47	ENSRNOG00000001862.7	Ube2l3	ubiquitin-conjugating enzyme E2L 3 [Source:RGD Symbol;Acc:1308361]
ENSRNOT00000034074.5	464	268.135	1501.79	151.233	ENSRNOG00000024845.5	Mrps21	mitochondrial ribosomal protein S21 [Source:RGD Symbol;Acc:1592330]
ENSRNOT00000012088.7	1432	1233.77	6908	151.186	ENSRNOG00000008956.7	Cdkn2c	cyclin-dependent kinase inhibitor 2C [Source:RGD Symbol;Acc:2325]
ENSRNOT00000008557.6	2647	2448.77	13692	150.977	ENSRNOG00000006001.6	Luc7l2	LUC7-like 2 pre-mRNA splicing factor [Source:RGD Symbol;Acc:1308651]
ENSRNOT00000080434.1	2202	2003.77	11202	150.952	ENSRNOG00000060723.1	AABR07071244.1
ENSRNOT00000023651.6	1047	848.767	4740	150.793	ENSRNOG00000017506.7	Cltb	clathrin, light chain B [Source:RGD Symbol;Acc:621353]
ENSRNOT00000017770.5	1769	1570.77	8770.22	150.761	ENSRNOG00000012957.7	Sh3glb1	SH3 domain -containing GRB2-like endophilin B1 [Source:RGD Symbol;Acc:1304859]
ENSRNOT00000019570.6	759	560.785	3129.31	150.676	ENSRNOG00000025810.5	Grcc10	gene rich cluster, C10 gene [Source:RGD Symbol;Acc:2318975]
ENSRNOT00000087247.1	666	467.837	2609.47	150.608	ENSRNOG00000054945.1	AABR07015081.2
ENSRNOT00000077306.1	666	467.837	2609.47	150.608	ENSRNOG00000060518.1	AABR07015057.1
ENSRNOT00000092125.1	3851	3652.77	20358.3	150.491	ENSRNOG00000014610.5	Anpep	alanyl aminopeptidase, membrane [Source:RGD Symbol;Acc:2991]
ENSRNOT00000040865.6	3887	3688.77	20556.3	150.472	ENSRNOG00000003226.8	Mprip	myosin phosphatase Rho interacting protein [Source:RGD Symbol;Acc:619947]
ENSRNOT00000093172.1	810	611.767	3409.08	150.467	ENSRNOG00000000527.6	Mtch1	mitochondrial carrier 1 [Source:RGD Symbol;Acc:1309262]
ENSRNOT00000028807.7	1486	1287.77	7176	150.465	ENSRNOG00000021215.7	Rbm8a	RNA binding motif protein 8A [Source:RGD Symbol;Acc:1310099]
ENSRNOT00000018240.5	1624	1425.77	7943	150.427	ENSRNOG00000013514.5	Maf1	MAF1 homolog, negative regulator of RNA polymerase III [Source:RGD Symbol;Acc:1359315]
ENSRNOT00000007320.5	4501	4302.77	23964.8	150.389	ENSRNOG00000020346.7	Best1	bestrophin 1 [Source:RGD Symbol;Acc:1311656]
ENSRNOT00000089193.1	1251	1052.77	5861	150.325	ENSRNOG00000061684.1	Ndufa9	NADH:ubiquinone oxidoreductase subunit A9 [Source:RGD Symbol;Acc:1307307]
ENSRNOT00000017353.5	2027	1828.77	10176	150.248	ENSRNOG00000011346.5	Ehd2	EH-domain containing 2 [Source:RGD Symbol;Acc:1560856]
ENSRNOT00000022921.6	1416	1217.77	6776	150.245	ENSRNOG00000017078.6	Selenon	selenoprotein N [Source:RGD Symbol;Acc:1304574]
ENSRNOT00000091542.1	1447	1248.77	6940.78	150.078	ENSRNOG00000022289.6	Aip	aryl-hydrocarbon receptor-interacting protein [Source:RGD Symbol;Acc:628619]
ENSRNOT00000001261.6	950	751.767	4176	149.992	ENSRNOG00000000954.7	Polr1d	RNA polymerase I and III subunit D [Source:RGD Symbol;Acc:1564358]
ENSRNOT00000019386.3	2488	2289.77	12719.3	149.99	ENSRNOG00000014297.3	Sdc4	syndecan 4 [Source:RGD Symbol;Acc:3650]
ENSRNOT00000002996.5	1347	1148.77	6375	149.844	ENSRNOG00000002205.6	Ociad1	OCIA domain containing 1 [Source:RGD Symbol;Acc:1359549]
ENSRNOT00000003926.6	951	752.767	4174	149.721	ENSRNOG00000002928.6	Guk1	guanylate kinase 1 [Source:RGD Symbol;Acc:1309638]
ENSRNOT00000002085.6	1638	1439.77	7970	149.471	ENSRNOG00000001524.7	Hat1	histone acetyltransferase 1 [Source:RGD Symbol;Acc:1305716]
ENSRNOT00000009132.6	5081	4882.77	27018	149.41	ENSRNOG00000006526.7	Sema3c	semaphorin 3C [Source:RGD Symbol;Acc:1309343]
ENSRNOT00000074404.2	1831	1632.77	9029	149.316	ENSRNOG00000048682.2	Zwint	ZW10 interacting kinetochore protein [Source:RGD Symbol;Acc:628671]
ENSRNOT00000029712.4	629	430.926	2381.69	149.236	ENSRNOG00000024539.5	Ndufb6	NADH:ubiquinone oxidoreductase subunit B6 [Source:RGD Symbol;Acc:1311354]
ENSRNOT00000013997.6	1288	1089.77	6022	149.21	ENSRNOG00000010038.6	Psmc5	proteasome 26S subunit, ATPase 5 [Source:RGD Symbol;Acc:708376]
ENSRNOT00000017422.6	670	471.837	2607	149.19	ENSRNOG00000012778.6	Magoh	mago homolog, exon junction complex subunit [Source:RGD Symbol;Acc:1305174]
ENSRNOT00000082107.1	3270	3071.77	16942	148.925	ENSRNOG00000060753.1	Esyt1	extended synaptotagmin 1 [Source:RGD Symbol;Acc:3053]
ENSRNOT00000019978.3	1084	885.767	4877	148.67	ENSRNOG00000014828.5	Avpi1	arginine vasopressin-induced 1 [Source:RGD Symbol;Acc:621721]
ENSRNOT00000092663.1	1917	1718.77	9450.81	148.472	ENSRNOG00000000520.8	Srsf3	serine and arginine rich splicing factor 3 [Source:RGD Symbol;Acc:1309233]
ENSRNOT00000078910.1	2044	1845.77	10136	148.279	ENSRNOG00000052219.1	Gm2a	GM2 ganglioside activator [Source:RGD Symbol;Acc:628651]
ENSRNOT00000067542.3	2828	2629.77	14424	148.102	ENSRNOG00000008830.7	Nfe2l1	nuclear factor, erythroid 2-like 1 [Source:RGD Symbol;Acc:1311972]
ENSRNOT00000092622.1	766	567.767	3112.23	148.011	ENSRNOG00000046548.2	Rhox5	Rhox homeobox family member 5 [Source:RGD Symbol;Acc:3295]
ENSRNOT00000081123.1	675	476.821	2611	147.857	ENSRNOG00000061231.1	Selenom	selenoprotein M [Source:RGD Symbol;Acc:1565037]
ENSRNOT00000026327.7	5184	4985.77	27293	147.812	ENSRNOG00000019400.7	Dag1	dystroglycan 1 [Source:RGD Symbol;Acc:621890]
ENSRNOT00000018877.7	3112	2913.77	15923	147.557	ENSRNOG00000013963.7	Il6st	interleukin 6 signal transducer [Source:RGD Symbol;Acc:2903]
ENSRNOT00000022309.7	1998	1799.77	9818	147.298	ENSRNOG00000016356.7	Got1	glutamic-oxaloacetic transaminase 1 [Source:RGD Symbol;Acc:2721]
ENSRNOT00000033984.5	2466	2267.77	12333.4	146.851	ENSRNOG00000001351.6	Trafd1	TRAF type zinc finger domain containing 1 [Source:RGD Symbol;Acc:620171]
ENSRNOT00000004305.5	1895	1696.77	9215	146.644	ENSRNOG00000003228.5	Mid1ip1	MID1 interacting protein 1 [Source:RGD Symbol;Acc:1303258]
ENSRNOT00000005694.5	870	671.767	3648	146.632	ENSRNOG00000004312.5	Tmbim4	transmembrane BAX inhibitor motif containing 4 [Source:RGD Symbol;Acc:735173]
ENSRNOT00000013353.6	1857	1658.77	9005.85	146.599	ENSRNOG00000009960.8	Puf60	poly-U binding splicing factor 60 [Source:RGD Symbol;Acc:621674]
ENSRNOT00000005374.5	1628	1429.77	7758.73	146.527	ENSRNOG00000003864.5	Gipc1	GIPC PDZ domain containing family, member 1 [Source:RGD Symbol;Acc:68338]
ENSRNOT00000002486.5	2047	1848.77	10031	146.505	ENSRNOG00000001817.5	Tm7sf3	transmembrane 7 superfamily member 3 [Source:RGD Symbol;Acc:1306752]
ENSRNOT00000027381.7	1052	853.767	4632.24	146.502	ENSRNOG00000020178.7	Cope	coatomer protein complex, subunit epsilon [Source:RGD Symbol;Acc:1306785]
ENSRNOT00000017006.7	936	737.767	4000.83	146.427	ENSRNOG00000012684.7	Bloc1s2	biogenesis of lysosomal organelles complex-1, subunit 2 [Source:RGD Symbol;Acc:1306551]
ENSRNOT00000019713.6	4712	4513.77	24473	146.399	ENSRNOG00000014617.7	Tgoln2	trans-golgi network protein 2 [Source:RGD Symbol;Acc:620445]
ENSRNOT00000023221.7	1037	838.767	4543	146.249	ENSRNOG00000017279.7	Tmem50a	transmembrane protein 50A [Source:RGD Symbol;Acc:1305638]
ENSRNOT00000052098.5	2765	2566.77	13900.5	146.23	ENSRNOG00000031789.5	Rangap1	RAN GTPase activating protein 1 [Source:RGD Symbol;Acc:1310380]
ENSRNOT00000087513.1	1175	976.767	5288.73	146.201	ENSRNOG00000009856.7	Sypl1	synaptophysin-like 1 [Source:RGD Symbol;Acc:1359569]
ENSRNOT00000083255.1	3785	3586.77	19407	146.099	ENSRNOG00000054257.1	Adam10	ADAM metallopeptidase domain 10 [Source:RGD Symbol;Acc:2032]
ENSRNOT00000031842.6	2160	1961.77	10603	145.939	ENSRNOG00000026905.6	Ppm1g	protein phosphatase, Mg2+/Mn2+ dependent, 1G [Source:RGD Symbol;Acc:628676]
ENSRNOT00000013073.4	993	794.767	4292.76	145.844	ENSRNOG00000009734.4	Akr1b8	aldo-keto reductase family 1, member B8 [Source:RGD Symbol;Acc:708475]
ENSRNOT00000082442.1	2050	1851.77	9998.43	145.793	ENSRNOG00000013971.7	Psat1	phosphoserine aminotransferase 1 [Source:RGD Symbol;Acc:735170]
ENSRNOT00000012634.6	2170	1971.77	10645.6	145.783	ENSRNOG00000009437.7	Ewsr1	EWS RNA-binding protein 1 [Source:RGD Symbol;Acc:1307258]
ENSRNOT00000049848.1	1755	1556.77	8400	145.696	ENSRNOG00000007249.4	Cdkn1b	cyclin-dependent kinase inhibitor 1B [Source:RGD Symbol;Acc:69062]
ENSRNOT00000088481.1	2844	2645.77	14267.1	145.604	ENSRNOG00000008165.5	Tpx2	TPX2, microtubule nucleation factor [Source:RGD Symbol;Acc:1311894]
ENSRNOT00000035486.4	2783	2584.77	13936.7	145.589	ENSRNOG00000025459.4	Mars1	methionyl-tRNA synthetase 1 [Source:RGD Symbol;Acc:1305321]
ENSRNOT00000009621.6	471	274.862	1482	145.588	ENSRNOG00000007336.7	Churc1	churchill domain containing 1 [Source:RGD Symbol;Acc:1305116]
ENSRNOT00000027150.3	1072	873.767	4710	145.551	ENSRNOG00000020016.3	Lamtor1	late endosomal/lysosomal adaptor, MAPK and MTOR activator 1 [Source:RGD Symbol;Acc:735078]
ENSRNOT00000070984.2	1380	1181.77	6362	145.363	ENSRNOG00000045740.2	Tmx3	thioredoxin-related transmembrane protein 3 [Source:RGD Symbol;Acc:1592777]
ENSRNOT00000047698.5	3448	3249.77	17481.1	145.247	ENSRNOG00000031173.6	Snd1	staphylococcal nuclease and tudor domain containing 1 [Source:RGD Symbol;Acc:631340]
ENSRNOT00000030931.5	917	718.767	3861	145.045	ENSRNOG00000043328.3	Chmp2a	charged multivesicular body protein 2A [Source:RGD Symbol;Acc:1305050]
ENSRNOT00000023379.4	1503	1304.77	6999.97	144.862	ENSRNOG00000017352.4	Ctdnep1	CTD nuclear envelope phosphatase 1 [Source:RGD Symbol;Acc:1310172]
ENSRNOT00000089205.1	294	117.902	632	144.74	ENSRNOG00000060069.1	AABR07059891.1
ENSRNOT00000017139.6	2022	1823.77	9770	144.649	ENSRNOG00000012406.6	Pcbp4	poly(rC) binding protein 4 [Source:RGD Symbol;Acc:1307910]
ENSRNOT00000063942.1	1964	1765.77	9457.35	144.62	ENSRNOG00000002101.6	Paics	phosphoribosylaminoimidazole carboxylase and phosphoribosylaminoimidazolesuccinocarboxamide synthase [Source:RGD Symbol;Acc:620066]
ENSRNOT00000090875.1	1578	1379.77	7382.78	144.479	ENSRNOG00000013195.6	Ruvbl1	RuvB-like AAA ATPase 1 [Source:RGD Symbol;Acc:68373]
ENSRNOT00000025260.7	1926	1727.77	9239.15	144.39	ENSRNOG00000018536.7	Pck2	phosphoenolpyruvate carboxykinase 2 (mitochondrial) [Source:RGD Symbol;Acc:1311112]
ENSRNOT00000063967.3	2465	2266.77	12106.5	144.212	ENSRNOG00000006545.8	Septin7	septin 7 [Source:RGD Symbol;Acc:620469]
ENSRNOT00000057177.3	2108	1909.77	10197	144.173	ENSRNOG00000018390.6	Pld3	phospholipase D family, member 3 [Source:RGD Symbol;Acc:1308248]
ENSRNOT00000009563.2	2376	2177.77	11619	144.062	ENSRNOG00000007152.2	Bhlhe40	basic helix-loop-helix family, member e40 [Source:RGD Symbol;Acc:68439]
ENSRNOT00000032047.5	1743	1544.77	8241.29	144.053	ENSRNOG00000024470.5	Lman1	lectin, mannose-binding, 1 [Source:RGD Symbol;Acc:71020]
ENSRNOT00000001853.3	1853	1654.77	8827.42	144.042	ENSRNOG00000033220.6	Oas1f	2 ' -5 ' oligoadenylate synthetase 1F [Source:RGD Symbol;Acc:1359647]
ENSRNOT00000057585.4	8136	7937.77	42318.2	143.953	ENSRNOG00000014288.8	Fn1	fibronectin 1 [Source:RGD Symbol;Acc:2624]
ENSRNOT00000023429.3	1206	1007.77	5366.18	143.779	ENSRNOG00000017405.7	Raly	RALY heterogeneous nuclear ribonucleoprotein [Source:RGD Symbol;Acc:1307228]
ENSRNOT00000007285.5	1424	1225.77	6516	143.537	ENSRNOG00000005376.5	Mad2l1	mitotic arrest deficient 2 like 1 [Source:RGD Symbol;Acc:1310889]
ENSRNOT00000020646.6	2274	2075.77	11030.7	143.488	ENSRNOG00000015295.6	Ctdsp1	CTD small phosphatase 1 [Source:RGD Symbol;Acc:1305629]
ENSRNOT00000025129.8	1257	1058.77	5624	143.429	ENSRNOG00000018615.8	Cenph	centromere protein H [Source:RGD Symbol;Acc:1583506]
ENSRNOT00000026398.5	2262	2063.77	10962	143.423	ENSRNOG00000019450.5	Etf1	eukaryotic translation termination factor 1 [Source:RGD Symbol;Acc:1305712]
ENSRNOT00000022170.5	2661	2462.77	13075	143.354	ENSRNOG00000016454.6	Nasp	nuclear autoantigenic sperm protein [Source:RGD Symbol;Acc:1359609]
ENSRNOT00000037016.6	1126	927.767	4917.96	143.132	ENSRNOG00000023375.6	Rab34	RAB34, member RAS oncogene family [Source:RGD Symbol;Acc:1305058]
ENSRNOT00000089456.1	6791	6592.77	34940.8	143.106	ENSRNOG00000016117.7	Myof	myoferlin [Source:RGD Symbol;Acc:1564216]
ENSRNOT00000081574.1	1314	1115.77	5911.53	143.06	ENSRNOG00000006545.8	Septin7	septin 7 [Source:RGD Symbol;Acc:620469]
ENSRNOT00000025353.5	1100	901.767	4773	142.918	ENSRNOG00000018653.5	Pfdn1	prefoldin subunit 1 [Source:RGD Symbol;Acc:1305603]
ENSRNOT00000086847.1	1479	1280.77	6773.81	142.809	ENSRNOG00000056585.1	Fscn1	fascin actin-bundling protein 1 [Source:RGD Symbol;Acc:1583309]
ENSRNOT00000059564.4	2139	1940.77	10253.3	142.653	ENSRNOG00000018456.7	LOC100911664	uncharacterized LOC100911664 [Source:RGD Symbol;Acc:6491729]
ENSRNOT00000012334.7	5552	5353.77	28258.8	142.523	ENSRNOG00000008749.7	Col5a1	collagen type V alpha 1 chain [Source:RGD Symbol;Acc:70920]
ENSRNOT00000013488.4	1961	1762.77	9299	142.44	ENSRNOG00000009934.4	Emc3	ER membrane protein complex subunit 3 [Source:RGD Symbol;Acc:1311566]
ENSRNOT00000036172.6	2190	1991.77	10502.1	142.374	ENSRNOG00000007921.8	Hnrnpm	heterogeneous nuclear ribonucleoprotein M [Source:RGD Symbol;Acc:620369]
ENSRNOT00000033627.3	4122	3923.77	20683	142.332	ENSRNOG00000026842.5	Nnt	nicotinamide nucleotide transhydrogenase [Source:RGD Symbol;Acc:1587346]
ENSRNOT00000087555.1	2375	2176.77	11472.5	142.31	ENSRNOG00000006148.6	RGD1310352	similar to HTGN29 protein; keratinocytes associated transmembrane protein 2 [Source:RGD Symbol;Acc:1310352]
ENSRNOT00000078175.1	4304	4105.77	21637.8	142.302	ENSRNOG00000010048.6	Dctn1	dynactin subunit 1 [Source:RGD Symbol;Acc:62038]
ENSRNOT00000074515.2	2100	1901.77	10020.4	142.271	ENSRNOG00000000204.7	Syncrip	synaptotagmin binding, cytoplasmic RNA interacting protein [Source:RGD Symbol;Acc:1305683]
ENSRNOT00000059190.4	1931	1732.77	9108.4	141.936	ENSRNOG00000003399.8	Hnrnph1	heterogeneous nuclear ribonucleoprotein H1 [Source:RGD Symbol;Acc:620840]
ENSRNOT00000001961.3	2438	2239.77	11750	141.653	ENSRNOG00000001442.3	Por	cytochrome p450 oxidoreductase [Source:RGD Symbol;Acc:68335]
ENSRNOT00000075425.1	1391	1192.77	6257	141.645	ENSRNOG00000048981.1	Ahsa1	activator of Hsp90 ATPase activity 1 [Source:RGD Symbol;Acc:1589285]
ENSRNOT00000066371.3	863	664.767	3483.94	141.512	ENSRNOG00000015437.7	Tmem14c	transmembrane protein 14C [Source:RGD Symbol;Acc:621692]
ENSRNOT00000033784.4	2921	2722.77	14260.3	141.42	ENSRNOG00000024428.4	Kif20a	kinesin family member 20A [Source:RGD Symbol;Acc:1307695]
ENSRNOT00000003605.7	5656	5457.77	28584.7	141.419	ENSRNOG00000002680.7	Lamc1	laminin subunit gamma 1 [Source:RGD Symbol;Acc:621052]
ENSRNOT00000079231.1	666	467.837	2447.64	141.268	ENSRNOG00000012786.7	Pgrmc1	progesterone receptor membrane component 1 [Source:RGD Symbol;Acc:70890]
ENSRNOT00000080663.1	2728	2529.77	13230	141.212	ENSRNOG00000055860.1	Arl8b	ADP-ribosylation factor like GTPase 8B [Source:RGD Symbol;Acc:1562830]
ENSRNOT00000024517.6	1615	1416.77	7405	141.129	ENSRNOG00000018117.6	Ndufv1	NADH:ubiquinone oxidoreductase core subunit V1 [Source:RGD Symbol;Acc:1359247]
ENSRNOT00000026470.6	1679	1480.77	7728	140.92	ENSRNOG00000019568.6	Jund	JunD proto-oncogene, AP-1 transcription factor subunit [Source:RGD Symbol;Acc:2945]
ENSRNOT00000037393.5	1060	861.767	4496	140.873	ENSRNOG00000023322.5	Ostc	oligosaccharyltransferase complex non-catalytic subunit [Source:RGD Symbol;Acc:1560708]
ENSRNOT00000011371.6	2896	2697.77	14074.7	140.872	ENSRNOG00000008393.8	Tax1bp1	Tax1 binding protein 1 [Source:RGD Symbol;Acc:708579]
ENSRNOT00000046886.4	1539	1340.77	6994	140.852	ENSRNOG00000031387.4	Dazap1	DAZ associated protein 1 [Source:RGD Symbol;Acc:1305280]
ENSRNOT00000025819.5	1417	1218.77	6355	140.795	ENSRNOG00000018994.5	Psmc4	proteasome 26S subunit, ATPase 4 [Source:RGD Symbol;Acc:621102]
ENSRNOT00000001975.7	6833	6634.77	34584	140.747	ENSRNOG00000001453.7	Baz1b	bromodomain adjacent to zinc finger domain, 1B [Source:RGD Symbol;Acc:1597089]
ENSRNOT00000016965.5	889	690.767	3598	140.644	ENSRNOG00000042503.2	Ndufv2	NADH:ubiquinone oxidoreductase core subunit V2 [Source:RGD Symbol;Acc:621733]
ENSRNOT00000011907.7	1320	1121.77	5841	140.597	ENSRNOG00000008672.7	Chmp5	charged multivesicular body protein 5 [Source:RGD Symbol;Acc:1305968]
ENSRNOT00000016450.6	1535	1336.77	6952	140.425	ENSRNOG00000012026.6	Psmc2	proteasome 26S subunit, ATPase 2 [Source:RGD Symbol;Acc:3428]
ENSRNOT00000075852.1	2073	1874.77	9741.52	140.304	ENSRNOG00000014445.7	Hp1bp3	heterochromatin protein 1, binding protein 3 [Source:RGD Symbol;Acc:735099]
ENSRNOT00000000673.4	2625	2426.77	12604	140.24	ENSRNOG00000000557.5	Ppa1	inorganic pyrophosphatase 1 [Source:RGD Symbol;Acc:1589773]
ENSRNOT00000090773.1	1472	1273.77	6613	140.184	ENSRNOG00000053659.1	RGD1311703	similar to sid2057p [Source:RGD Symbol;Acc:1311703]
ENSRNOT00000050562.4	935	736.767	3825	140.182	ENSRNOG00000019497.7	Mrpl17	mitochondrial ribosomal protein L17 [Source:RGD Symbol;Acc:70943]
ENSRNOT00000040029.5	4779	4580.77	23778	140.161	ENSRNOG00000001738.8	Eif4g1	eukaryotic translation initiation factor 4 gamma, 1 [Source:RGD Symbol;Acc:1306144]
ENSRNOT00000091588.1	804	605.767	3143.56	140.123	ENSRNOG00000054561.1	Isg20	interferon stimulated exonuclease gene 20 [Source:RGD Symbol;Acc:1306407]
ENSRNOT00000031272.5	1948	1749.77	9062.57	139.85	ENSRNOG00000025592.5	Tspan31	tetraspanin 31 [Source:RGD Symbol;Acc:1309876]
ENSRNOT00000086853.1	1811	1612.77	8349.46	139.791	ENSRNOG00000059015.1	Triobp	TRIO and F-actin binding protein [Source:RGD Symbol;Acc:1308485]
ENSRNOT00000005794.6	381	190.729	987.005	139.732	ENSRNOG00000004316.6	Llph	LLP homolog, long-term synaptic facilitation factor [Source:RGD Symbol;Acc:1308261]
ENSRNOT00000065393.2	2037	1838.77	9492.75	139.398	ENSRNOG00000005428.8	Ctbp1	C-terminal binding protein 1 [Source:RGD Symbol;Acc:2441]
ENSRNOT00000011654.6	1419	1220.77	6295	139.237	ENSRNOG00000008604.7	Nsfl1c	NSFL1 cofactor [Source:RGD Symbol;Acc:619952]
ENSRNOT00000002599.6	1802	1603.77	8269.57	139.23	ENSRNOG00000001893.6	LOC100362453	serine/threonine-protein phosphatase 2A catalytic subunit alpha-like [Source:RGD Symbol;Acc:2318135]
ENSRNOT00000010028.7	2175	1976.77	10182	139.081	ENSRNOG00000007604.7	Igsf8	immunoglobulin superfamily, member 8 [Source:RGD Symbol;Acc:1311500]
ENSRNOT00000010481.6	2754	2555.77	13164	139.078	ENSRNOG00000007892.6	Tram1	translocation associated membrane protein 1 [Source:RGD Symbol;Acc:1359100]
ENSRNOT00000015811.6	693	494.821	2548	139.041	ENSRNOG00000011865.6	Ciao2b	cytosolic iron-sulfur assembly component 2B [Source:RGD Symbol;Acc:1585802]
ENSRNOT00000031571.6	1870	1671.77	8604.85	138.982	ENSRNOG00000021881.7	Metap2	methionyl aminopeptidase 2 [Source:RGD Symbol;Acc:70995]
ENSRNOT00000023537.5	2558	2359.77	12146	138.981	ENSRNOG00000017354.6	Zyx	zyxin [Source:RGD Symbol;Acc:620698]
ENSRNOT00000021689.5	3678	3479.77	17893	138.843	ENSRNOG00000015845.5	Niban2	niban apoptosis regulator 2 [Source:RGD Symbol;Acc:1307018]
ENSRNOT00000026184.4	2075	1876.77	9634	138.608	ENSRNOG00000019264.4	Ltbr	lymphotoxin beta receptor [Source:RGD Symbol;Acc:1309448]
ENSRNOT00000019346.6	4573	4374.77	22427	138.423	ENSRNOG00000028896.4	A2m	alpha-2-macroglobulin [Source:RGD Symbol;Acc:2004]
ENSRNOT00000015218.6	1201	1002.77	5140	138.406	ENSRNOG00000011029.6	Sec11a	SEC11 homolog A, signal peptidase complex subunit [Source:RGD Symbol;Acc:69360]
ENSRNOT00000071425.2	2713	2514.77	12890	138.403	ENSRNOG00000047088.2	Rab10	RAB10, member RAS oncogene family [Source:RGD Symbol;Acc:620879]
ENSRNOT00000074225.2	946	747.767	3826	138.156	ENSRNOG00000050547.2	Syngr2	synaptogyrin 2 [Source:RGD Symbol;Acc:621334]
ENSRNOT00000074847.2	2364	2165.77	11081	138.152	ENSRNOG00000048733.2	Nup62	nucleoporin 62 [Source:RGD Symbol;Acc:619938]
ENSRNOT00000083714.1	1455	1256.77	6420	137.934	ENSRNOG00000053230.1	Fopnl	FGFR1OP N-terminal like [Source:RGD Symbol;Acc:1305823]
ENSRNOT00000044582.3	297	120.157	613	137.753	ENSRNOG00000031053.3	Mt-nd4l	mitochondrially encoded NADH 4L dehydrogenase [Source:RGD Symbol;Acc:620494]
ENSRNOT00000071917.2	1008	809.767	4128	137.648	ENSRNOG00000046330.2	AABR07029581.1
ENSRNOT00000045083.4	943	744.767	3795	137.589	ENSRNOG00000031851.5	Ndufa4l2	NDUFA4, mitochondrial complex associated like 2 [Source:RGD Symbol;Acc:2324558]
ENSRNOT00000004895.3	998	799.767	4072	137.479	ENSRNOG00000003549.3	Cnpy2	canopy FGF signaling regulator 2 [Source:RGD Symbol;Acc:1589072]
ENSRNOT00000021514.5	1824	1625.77	8267.34	137.309	ENSRNOG00000036742.3	Uqcrc2	ubiquinol cytochrome c reductase core protein 2 [Source:RGD Symbol;Acc:1359150]
ENSRNOT00000031005.5	14714	14515.8	73770	137.224	ENSRNOG00000025053.5	Lrp1	LDL receptor related protein 1 [Source:RGD Symbol;Acc:1307535]
ENSRNOT00000012985.6	877	678.767	3449	137.203	ENSRNOG00000009785.6	Cdkn3	cyclin-dependent kinase inhibitor 3 [Source:RGD Symbol;Acc:1307781]
ENSRNOT00000019126.5	4954	4755.77	24151	137.122	ENSRNOG00000013516.6	Sf3b1	splicing factor 3b, subunit 1 [Source:RGD Symbol;Acc:620148]
ENSRNOT00000081634.1	2221	2022.77	10258.1	136.934	ENSRNOG00000058908.1	Hmgb1	high mobility group box 1 [Source:RGD Symbol;Acc:2802]
ENSRNOT00000021954.7	1605	1406.77	7128	136.816	ENSRNOG00000016257.7	Cotl1	coactosin-like F-actin binding protein 1 [Source:RGD Symbol;Acc:1305498]
ENSRNOT00000077356.1	1686	1487.77	7537	136.79	ENSRNOG00000053362.1	Gabarapl1	GABA type A receptor associated protein like 1 [Source:RGD Symbol;Acc:1596143]
ENSRNOT00000013571.5	1479	1280.77	6481	136.635	ENSRNOG00000010021.5	Isy1	ISY1 splicing factor homolog [Source:RGD Symbol;Acc:1307688]
ENSRNOT00000001036.7	1692	1493.77	7556.27	136.589	ENSRNOG00000000777.7	RT1-S3	RT1 class Ib, locus S3 [Source:RGD Symbol;Acc:735037]
ENSRNOT00000013375.4	1377	1178.77	5953	136.364	ENSRNOG00000009432.4	Eif2s1	eukaryotic translation initiation factor 2 subunit alpha [Source:RGD Symbol;Acc:620963]
ENSRNOT00000082086.1	2652	2453.77	12376.7	136.196	ENSRNOG00000031896.5	Stt3a	STT3 oligosaccharyltransferase complex catalytic subunit A [Source:RGD Symbol;Acc:1565793]
ENSRNOT00000011339.6	1157	958.767	4832	136.083	ENSRNOG00000008224.6	Jdp2	Jun dimerization protein 2 [Source:RGD Symbol;Acc:621611]
ENSRNOT00000084651.1	2586	2387.77	12027	136.006	ENSRNOG00000053991.1	P3h1	prolyl 3-hydroxylase 1 [Source:RGD Symbol;Acc:628823]
ENSRNOT00000013331.6	1325	1126.77	5667.58	135.817	ENSRNOG00000009811.6	Cnih1	cornichon family AMPA receptor auxiliary protein 1 [Source:RGD Symbol;Acc:1312030]
ENSRNOT00000060568.4	3348	3149.77	15837	135.764	ENSRNOG00000016779.7	Fam120a	family with sequence similarity 120A [Source:RGD Symbol;Acc:1306643]
ENSRNOT00000027076.3	766	567.767	2846	135.349	ENSRNOG00000019987.3	Scand1	SCAN domain-containing 1 [Source:RGD Symbol;Acc:1308530]
ENSRNOT00000056166.4	5503	5304.77	26565.8	135.222	ENSRNOG00000020748.7	Map4	microtubule-associated protein 4 [Source:RGD Symbol;Acc:1564359]
ENSRNOT00000000134.4	1685	1486.77	7435	135.03	ENSRNOG00000000122.4	Ak2	adenylate kinase 2 [Source:RGD Symbol;Acc:2077]
ENSRNOT00000031498.3	1709	1510.77	7554.58	135.022	ENSRNOG00000021682.4	Dcakd	dephospho-CoA kinase domain containing [Source:RGD Symbol;Acc:1359211]
ENSRNOT00000020663.3	1585	1386.77	6934	135.012	ENSRNOG00000015182.6	Ppp2cb	protein phosphatase 2 catalytic subunit beta [Source:RGD Symbol;Acc:3381]
ENSRNOT00000019443.6	1243	1044.77	5220	134.909	ENSRNOG00000014415.6	Hsbp1	heat shock factor binding protein 1 [Source:RGD Symbol;Acc:628632]
ENSRNOT00000065997.1	1326	1127.77	5630	134.797	ENSRNOG00000009992.6	Rabggtb	Rab geranylgeranyltransferase subunit beta [Source:RGD Symbol;Acc:3530]
ENSRNOT00000040771.4	315	134.378	670.803	134.791	ENSRNOG00000030291.4	AC095947.1
ENSRNOT00000041495.4	1335	1136.77	5674.64	134.79	ENSRNOG00000025625.5	Rnase4	ribonuclease A family member 4 [Source:RGD Symbol;Acc:61823]
ENSRNOT00000044346.5	1664	1465.77	7312.26	134.703	ENSRNOG00000017106.6	Csnk1a1	casein kinase 1, alpha 1 [Source:RGD Symbol;Acc:71098]
ENSRNOT00000067860.3	253	87.7894	437.839	134.668	ENSRNOG00000012089.7	Cstf3	cleavage stimulation factor subunit 3 [Source:RGD Symbol;Acc:1305901]
ENSRNOT00000017254.6	1277	1078.77	5379.75	134.656	ENSRNOG00000012630.6	Rhoc	ras homolog family member C [Source:RGD Symbol;Acc:1304965]
ENSRNOT00000011123.5	617	418.968	2088	134.568	ENSRNOG00000008309.5	Rpa3	replication protein A3 [Source:RGD Symbol;Acc:1306810]
ENSRNOT00000083446.1	2867	2668.77	13279	134.353	ENSRNOG00000057367.1	Glud1	glutamate dehydrogenase 1 [Source:RGD Symbol;Acc:2708]
ENSRNOT00000012260.6	2048	1849.77	9192	134.179	ENSRNOG00000008945.6	Nans	N-acetylneuraminate synthase [Source:RGD Symbol;Acc:1311943]
ENSRNOT00000027234.5	2487	2288.77	11360.2	134.022	ENSRNOG00000019996.5	Slc16a1	solute carrier family 16 member 1 [Source:RGD Symbol;Acc:3690]
ENSRNOT00000008164.4	1707	1508.77	7487	133.991	ENSRNOG00000005988.4	Arl8a	ADP-ribosylation factor like GTPase 8A [Source:RGD Symbol;Acc:1565940]
ENSRNOT00000013841.3	753	554.785	2752	133.941	ENSRNOG00000010420.3	Sem1	SEM1, 26S proteasome complex subunit [Source:RGD Symbol;Acc:1590628]
ENSRNOT00000088161.1	114	14.3326	71	133.759	ENSRNOG00000024142.6	Arglu1	arginine and glutamate rich 1 [Source:RGD Symbol;Acc:1310061]
ENSRNOT00000082857.1	654	455.837	2252	133.398	ENSRNOG00000054563.1	Selenoh	selenoprotein H [Source:RGD Symbol;Acc:1563348]
ENSRNOT00000007164.5	1196	997.767	4929	133.389	ENSRNOG00000005358.5	Pmm1	phosphomannomutase 1 [Source:RGD Symbol;Acc:1310897]
ENSRNOT00000024447.6	876	677.767	3344	133.222	ENSRNOG00000018075.6	Spcs1	signal peptidase complex subunit 1 [Source:RGD Symbol;Acc:1309125]
ENSRNOT00000023861.6	3337	3138.77	15475	133.126	ENSRNOG00000017466.6	Kif5b	kinesin family member 5B [Source:RGD Symbol;Acc:621559]
ENSRNOT00000039067.3	587	389.047	1918	133.118	ENSRNOG00000026528.3	Mrps33	mitochondrial ribosomal protein S33 [Source:RGD Symbol;Acc:1309217]
ENSRNOT00000028787.8	2021	1822.77	8984	133.085	ENSRNOG00000021203.8	Atl3	atlastin GTPase 3 [Source:RGD Symbol;Acc:1309871]
ENSRNOT00000080422.1	662	463.837	2284.39	132.983	ENSRNOG00000051483.1	LOC103689961	selenoprotein W-like [Source:RGD Symbol;Acc:9418506]
ENSRNOT00000073005.1	5086	4887.77	24067	132.954	ENSRNOG00000050323.1	Srsf1	serine and arginine rich splicing factor 1 [Source:RGD Symbol;Acc:1587490]
ENSRNOT00000092554.1	259	92.0268	452.199	132.68	ENSRNOG00000053813.2	Nkap	NFKB activating protein [Source:RGD Symbol;Acc:1565955]
ENSRNOT00000058190.3	384	193.465	950	132.591	ENSRNOG00000038218.3	Ndufc1	NADH:ubiquinone oxidoreductase subunit C1 [Source:RGD Symbol;Acc:1586362]
ENSRNOT00000004653.3	1005	806.767	3961.51	132.588	ENSRNOG00000003269.3	Atp6v0e1	ATPase H+ transporting V0 subunit e1 [Source:RGD Symbol;Acc:621393]
ENSRNOT00000042711.4	1847	1648.77	8090	132.489	ENSRNOG00000050510.2	Rab1b	RAB1B, member RAS oncogene family [Source:RGD Symbol;Acc:1642882]
ENSRNOT00000073492.2	1224	1025.77	5033	132.486	ENSRNOG00000049497.2	Eif6	eukaryotic translation initiation factor 6 [Source:RGD Symbol;Acc:1305373]
ENSRNOT00000072299.2	1795	1596.77	7833	132.458	ENSRNOG00000049402.2	Nbl1	NBL1, DAN family BMP antagonist [Source:RGD Symbol;Acc:3151]
ENSRNOT00000013979.5	1062	863.767	4237	132.45	ENSRNOG00000010461.5	Gpx8	glutathione peroxidase 8 [Source:RGD Symbol;Acc:1307506]
ENSRNOT00000026445.6	1625	1426.77	6996	132.4	ENSRNOG00000019532.6	Emc10	ER membrane protein complex subunit 10 [Source:RGD Symbol;Acc:1303214]
ENSRNOT00000005987.3	6069	5870.77	28768	132.314	ENSRNOG00000004291.6	Cltc	clathrin heavy chain [Source:RGD Symbol;Acc:2364]
ENSRNOT00000008509.6	3247	3048.77	14934.6	132.27	ENSRNOG00000005736.6	Eif1ax	eukaryotic translation initiation factor 1A, X-linked [Source:RGD Symbol;Acc:1560198]
ENSRNOT00000025828.4	1740	1541.77	7549.31	132.215	ENSRNOG00000018972.4	Rab18	RAB18, member RAS oncogene family [Source:RGD Symbol;Acc:1308905]
ENSRNOT00000021868.7	1813	1614.77	7905.85	132.199	ENSRNOG00000016315.7	Cnpy3	canopy FGF signaling regulator 3 [Source:RGD Symbol;Acc:1597709]
ENSRNOT00000086560.1	2205	2006.77	9823.28	132.175	ENSRNOG00000014419.7	Brd7	bromodomain containing 7 [Source:RGD Symbol;Acc:1309891]
ENSRNOT00000038352.6	2811	2612.77	12787.9	132.157	ENSRNOG00000025383.6	Pdha1	pyruvate dehydrogenase E1 alpha 1 subunit [Source:RGD Symbol;Acc:3286]
ENSRNOT00000014062.4	4381	4182.77	20464	132.105	ENSRNOG00000009935.5	Xpo1	exportin 1 [Source:RGD Symbol;Acc:620517]
ENSRNOT00000008525.5	1324	1125.77	5502.6	131.981	ENSRNOG00000006359.5	Galk1	galactokinase 1 [Source:RGD Symbol;Acc:1305375]
ENSRNOT00000013695.7	3505	3306.77	16158.5	131.944	ENSRNOG00000010218.7	Eif5	eukaryotic translation initiation factor 5 [Source:RGD Symbol;Acc:619861]
ENSRNOT00000000211.5	3785	3586.77	17517.6	131.875	ENSRNOG00000046414.2	Vwa5a	von Willebrand factor A domain containing 5A [Source:RGD Symbol;Acc:735145]
ENSRNOT00000027580.4	1722	1523.77	7433.94	131.732	ENSRNOG00000020358.4	Ptov1	PTOV1, extended AT-hook containing adaptor protein [Source:RGD Symbol;Acc:1306977]
ENSRNOT00000023554.6	3220	3021.77	14725	131.579	ENSRNOG00000016552.6	Hmgcs1	3-hydroxy-3-methylglutaryl-CoA synthase 1 [Source:RGD Symbol;Acc:70970]
ENSRNOT00000021734.5	755	556.785	2710	131.423	ENSRNOG00000015967.5	Sh3bgrl3	SH3 domain binding glutamate-rich protein like 3 [Source:RGD Symbol;Acc:1308118]
ENSRNOT00000070818.3	3451	3252.77	15829.3	131.401	ENSRNOG00000047179.3	Aplp2	amyloid beta precursor like protein 2 [Source:RGD Symbol;Acc:2128]
ENSRNOT00000090262.1	2862	2663.77	12960.5	131.377	ENSRNOG00000003123.8	Rpa1	replication protein A1 [Source:RGD Symbol;Acc:1307376]
ENSRNOT00000025906.4	1735	1536.77	7474.66	131.333	ENSRNOG00000018993.4	Ilk	integrin-linked kinase [Source:RGD Symbol;Acc:620063]
ENSRNOT00000039133.5	5531	5332.77	25936	131.323	ENSRNOG00000028274.5	Myrf	myelin regulatory factor [Source:RGD Symbol;Acc:1306622]
ENSRNOT00000045997.4	766	567.767	2760	131.259	ENSRNOG00000028822.4	Bex3	brain expressed X-linked 3 [Source:RGD Symbol;Acc:3148]
ENSRNOT00000003691.3	2319	2120.77	10297	131.102	ENSRNOG00000002643.3	Ugdh	UDP-glucose 6-dehydrogenase [Source:RGD Symbol;Acc:621879]
ENSRNOT00000028051.4	2140	1941.77	9416	130.936	ENSRNOG00000020652.4	Tgfb1	transforming growth factor, beta 1 [Source:RGD Symbol;Acc:69051]
ENSRNOT00000027345.5	2900	2701.77	13059	130.513	ENSRNOG00000020167.5	Reep5	receptor accessory protein 5 [Source:RGD Symbol;Acc:1306047]
ENSRNOT00000011096.6	1883	1684.77	8130	130.299	ENSRNOG00000007838.6	Ddx47	DEAD-box helicase 47 [Source:RGD Symbol;Acc:1310437]
ENSRNOT00000000886.4	3412	3213.77	15505	130.271	ENSRNOG00000000697.4	Coro1c	coronin 1C [Source:RGD Symbol;Acc:1564490]
ENSRNOT00000026313.7	917	718.767	3467	130.244	ENSRNOG00000019439.7	Polr2g	RNA polymerase II subunit G [Source:RGD Symbol;Acc:621284]
ENSRNOT00000012715.4	3549	3350.77	16144	130.094	ENSRNOG00000008797.7	Tmpo	thymopoietin [Source:RGD Symbol;Acc:3875]
ENSRNOT00000005144.4	1207	1008.77	4856	129.981	ENSRNOG00000003815.4	Slc25a11	solute carrier family 25 member 11 [Source:RGD Symbol;Acc:708476]
ENSRNOT00000028328.5	831	632.767	3041.63	129.794	ENSRNOG00000020876.6	Bax	BCL2 associated X, apoptosis regulator [Source:RGD Symbol;Acc:2192]
ENSRNOT00000027842.3	2172	1973.77	9486.47	129.778	ENSRNOG00000020531.3	Fen1	flap structure-specific endonuclease 1 [Source:RGD Symbol;Acc:621821]
ENSRNOT00000004938.5	1037	838.767	4029	129.702	ENSRNOG00000003706.5	Ufc1	ubiquitin-fold modifier conjugating enzyme 1 [Source:RGD Symbol;Acc:1303313]
ENSRNOT00000059169.2	1220	1021.77	4907	129.675	ENSRNOG00000022980.5	Sdhd	succinate dehydrogenase complex subunit D [Source:RGD Symbol;Acc:735231]
ENSRNOT00000015177.6	2442	2243.77	10760	129.487	ENSRNOG00000010543.6	Srpra	SRP receptor subunit alpha [Source:RGD Symbol;Acc:1311504]
ENSRNOT00000019761.6	2363	2164.77	10368	129.323	ENSRNOG00000014690.6	Pigt	phosphatidylinositol glycan anchor biosynthesis, class T [Source:RGD Symbol;Acc:1307156]
ENSRNOT00000089185.1	3827	3628.77	17346.6	129.076	ENSRNOG00000048315.2	Eif2ak2	eukaryotic translation initiation factor 2-alpha kinase 2 [Source:RGD Symbol;Acc:3402]
ENSRNOT00000003891.6	1701	1502.77	7181	129.028	ENSRNOG00000002807.8	Septin9	septin 9 [Source:MGI Symbol;Acc:MGI:1858222]
ENSRNOT00000018001.4	1504	1305.77	6233	128.891	ENSRNOG00000013211.4	Chchd3	coiled-coil-helix-coiled-coil-helix domain containing 3 [Source:RGD Symbol;Acc:1310325]
ENSRNOT00000026710.5	3208	3009.77	14363	128.856	ENSRNOG00000019465.5	Gnai3	G protein subunit alpha i3 [Source:RGD Symbol;Acc:2714]
ENSRNOT00000028363.5	2404	2205.77	10518.2	128.758	ENSRNOG00000020892.6	Dpf2	double PHD fingers 2 [Source:RGD Symbol;Acc:1311699]
ENSRNOT00000002533.7	1471	1272.77	6067	128.711	ENSRNOG00000001849.7	Mapk1	mitogen activated protein kinase 1 [Source:RGD Symbol;Acc:70500]
ENSRNOT00000071420.2	2218	2019.77	9627	128.701	ENSRNOG00000047314.2	Tk1	thymidine kinase 1 [Source:RGD Symbol;Acc:621014]
ENSRNOT00000058700.2	969	770.767	3665.46	128.409	ENSRNOG00000030807.3	LOC100912427	nuclease-sensitive element-binding protein 1-like [Source:RGD Symbol;Acc:6486912]
ENSRNOT00000017101.6	1845	1646.77	7831.25	128.407	ENSRNOG00000012786.7	Pgrmc1	progesterone receptor membrane component 1 [Source:RGD Symbol;Acc:70890]
ENSRNOT00000023447.6	4327	4128.77	19616.8	128.292	ENSRNOG00000016924.8	Acly	ATP citrate lyase [Source:RGD Symbol;Acc:2018]
ENSRNOT00000036399.6	1585	1386.77	6583	128.177	ENSRNOG00000026502.6	Dscc1	DNA replication and sister chromatid cohesion 1 [Source:RGD Symbol;Acc:1561749]
ENSRNOT00000019642.6	1568	1369.77	6502	128.171	ENSRNOG00000014109.6	Psmd13	proteasome 26S subunit, non-ATPase 13 [Source:RGD Symbol;Acc:1305236]
ENSRNOT00000093404.1	159	31.6131	150	128.119	ENSRNOG00000049952.3	Gucd1	guanylyl cyclase domain containing 1 [Source:RGD Symbol;Acc:1597571]
ENSRNOT00000017211.6	3088	2889.77	13709	128.096	ENSRNOG00000012751.7	Tm9sf2	transmembrane 9 superfamily member 2 [Source:RGD Symbol;Acc:1359230]
ENSRNOT00000005815.6	839	640.767	3037.2	127.986	ENSRNOG00000004401.6	Mrpl13	mitochondrial ribosomal protein L13 [Source:RGD Symbol;Acc:1359587]
ENSRNOT00000013463.4	2262	2063.77	9779.38	127.95	ENSRNOG00000010034.5	Asah1	N-acylsphingosine amidohydrolase 1 [Source:RGD Symbol;Acc:621568]
ENSRNOT00000010720.3	4383	4184.77	19829	127.944	ENSRNOG00000007834.5	Cand1	cullin-associated and neddylation-dissociated 1 [Source:RGD Symbol;Acc:620479]
ENSRNOT00000072917.2	666	467.837	2216.15	127.908	ENSRNOG00000046585.2	AABR07054370.1	charged multivesicular body protein 4B [Source:NCBI gene;Acc:100359642]
ENSRNOT00000084846.1	1344	1145.77	5423.3	127.808	ENSRNOG00000059572.1	Tsen34l1	tRNA splicing endonuclease subunit 34-like 1 [Source:RGD Symbol;Acc:6503363]
ENSRNOT00000072573.2	255	89.2109	422.181	127.783	ENSRNOG00000050473.2	Rps27l	ribosomal protein S27-like [Source:RGD Symbol;Acc:1595396]
ENSRNOT00000027927.6	1176	977.767	4625	127.723	ENSRNOG00000020567.6	Fibp	FGF1 intracellular binding protein [Source:RGD Symbol;Acc:628715]
ENSRNOT00000086633.1	3067	2868.77	13556	127.593	ENSRNOG00000059947.1	Sdc1	syndecan 1 [Source:RGD Symbol;Acc:3648]
ENSRNOT00000024012.6	2895	2696.77	12735	127.511	ENSRNOG00000028498.5	Wdr1	WD repeat domain 1 [Source:RGD Symbol;Acc:1305789]
ENSRNOT00000067883.2	1259	1060.77	5009.24	127.51	ENSRNOG00000030683.5	Vps26a	VPS26 retromer complex component A [Source:RGD Symbol;Acc:1359254]
ENSRNOT00000021400.4	2088	1889.77	8920	127.452	ENSRNOG00000015591.5	Cndp2	carnosine dipeptidase 2 [Source:RGD Symbol;Acc:1305827]
ENSRNOT00000057895.4	427	233.09	1099.2	127.334	ENSRNOG00000038045.4	AC128960.1
ENSRNOT00000021840.4	8787	8588.77	40439	127.134	ENSRNOG00000014997.4	Igf2r	insulin-like growth factor 2 receptor [Source:RGD Symbol;Acc:2871]
ENSRNOT00000010092.7	3666	3467.77	16320	127.075	ENSRNOG00000007539.7	Rsad2	radical S-adenosyl methionine domain containing 2 [Source:RGD Symbol;Acc:620495]
ENSRNOT00000007259.4	1759	1560.77	7343.15	127.039	ENSRNOG00000005424.4	Odc1	ornithine decarboxylase 1 [Source:RGD Symbol;Acc:3227]
ENSRNOT00000017998.5	1278	1079.77	5076	126.935	ENSRNOG00000012616.5	Ppt1	palmitoyl-protein thioesterase 1 [Source:RGD Symbol;Acc:61994]
ENSRNOT00000036389.5	521	323.616	1521	126.908	ENSRNOG00000026646.5	Ndufs5	NADH:ubiquinone oxidoreductase subunit S5 [Source:RGD Symbol;Acc:1311081]
ENSRNOT00000084870.1	793	594.767	2787	126.526	ENSRNOG00000051450.1	Abracl	ABRA C-terminal like [Source:RGD Symbol;Acc:1583256]
ENSRNOT00000021310.5	913	714.767	3345	126.364	ENSRNOG00000015865.5	Ap2s1	adaptor related protein complex 2 subunit sigma 1 [Source:RGD Symbol;Acc:620188]
ENSRNOT00000028262.5	4389	4190.77	19596.8	126.265	ENSRNOG00000020813.6	Ltbp3	latent transforming growth factor beta binding protein 3 [Source:RGD Symbol;Acc:62057]
ENSRNOT00000015553.5	2737	2538.77	11862	126.161	ENSRNOG00000010721.5	Dlgap5	DLG associated protein 5 [Source:RGD Symbol;Acc:1311247]
ENSRNOT00000006917.5	1744	1545.77	7222	126.155	ENSRNOG00000004846.5	Atp6v1c1	ATPase H+ transporting V1 subunit C1 [Source:RGD Symbol;Acc:1311082]
ENSRNOT00000005070.5	1044	845.767	3951	126.138	ENSRNOG00000003802.5	Pttg1	PTTG1 regulator of sister chromatid separation, securin [Source:RGD Symbol;Acc:68359]
ENSRNOT00000001638.5	2571	2372.77	11076	126.043	ENSRNOG00000001223.5	Pttg1ip	PTTG1 interacting protein [Source:RGD Symbol;Acc:1305983]
ENSRNOT00000087033.1	1770	1571.77	7335.6	126.02	ENSRNOG00000005387.6	Rbm3	RNA binding motif protein 3 [Source:RGD Symbol;Acc:620145]
ENSRNOT00000004206.7	384	193.465	902	125.891	ENSRNOG00000003150.7	Mpc2	mitochondrial pyruvate carrier 2 [Source:RGD Symbol;Acc:1563422]
ENSRNOT00000009233.6	2420	2221.77	10347.9	125.76	ENSRNOG00000006859.6	Insig1	insulin induced gene 1 [Source:RGD Symbol;Acc:708457]
ENSRNOT00000093376.1	883	684.767	3188.6	125.733	ENSRNOG00000013604.7	Gpx4	glutathione peroxidase 4 [Source:RGD Symbol;Acc:69226]
ENSRNOT00000013570.6	3561	3362.77	15656	125.712	ENSRNOG00000009977.6	Thrap3	thyroid hormone receptor associated protein 3 [Source:RGD Symbol;Acc:1306129]
ENSRNOT00000030811.2	936	737.767	3431.81	125.602	ENSRNOG00000021960.2	AC109958.1	mortality factor 4-like protein 1-like [Source:NCBI gene;Acc:100910850]
ENSRNOT00000006566.6	3926	3727.77	17328.9	125.52	ENSRNOG00000046159.2	Gns	glucosamine (N-acetyl)-6-sulfatase [Source:RGD Symbol;Acc:1305877]
ENSRNOT00000023455.5	1999	1800.77	8368.49	125.482	ENSRNOG00000016991.5	Arl2bp	ADP-ribosylation factor like GTPase 2 binding protein [Source:RGD Symbol;Acc:1561471]
ENSRNOT00000092322.1	6849	6650.77	30900.1	125.452	ENSRNOG00000000852.6	Prrc2a	proline-rich coiled-coil 2A [Source:RGD Symbol;Acc:1303025]
ENSRNOT00000028758.5	1533	1334.77	6201	125.443	ENSRNOG00000021181.5	Sf3b4	splicing factor 3b, subunit 4 [Source:RGD Symbol;Acc:1309667]
ENSRNOT00000007711.5	1567	1368.77	6357	125.405	ENSRNOG00000005841.6	Erp44	endoplasmic reticulum protein 44 [Source:RGD Symbol;Acc:1309176]
ENSRNOT00000027435.4	877	678.767	3149	125.269	ENSRNOG00000020233.4	Rabac1	Rab acceptor 1 [Source:RGD Symbol;Acc:621002]
ENSRNOT00000022628.5	2148	1949.77	9036	125.137	ENSRNOG00000016807.5	Oat	ornithine aminotransferase [Source:RGD Symbol;Acc:621724]
ENSRNOT00000038176.5	9880	9681.77	44849	125.08	ENSRNOG00000028137.5	Mki67	marker of proliferation Ki-67 [Source:RGD Symbol;Acc:1305476]
ENSRNOT00000087888.1	642	443.896	2053.6	124.918	ENSRNOG00000013577.7	Kdelr3	KDEL endoplasmic reticulum protein retention receptor 3 [Source:RGD Symbol;Acc:1311536]
ENSRNOT00000037030.5	1029	830.767	3836.96	124.709	ENSRNOG00000024967.5	Uqcrb	ubiquinol-cytochrome c reductase binding protein [Source:RGD Symbol;Acc:1311971]
ENSRNOT00000027093.6	1357	1158.77	5343	124.503	ENSRNOG00000019973.6	Arl3	ADP ribosylation factor like GTPase 3 [Source:RGD Symbol;Acc:69327]
ENSRNOT00000092145.1	768	569.767	2626	124.448	ENSRNOG00000053560.1	Rhou	ras homolog family member U [Source:MGI Symbol;Acc:MGI:1916831]
ENSRNOT00000010811.7	2890	2691.77	12386	124.247	ENSRNOG00000007393.7	Ndrg1	N-myc downstream regulated 1 [Source:RGD Symbol;Acc:1307303]
ENSRNOT00000080109.1	1886	1687.77	7765.77	124.24	ENSRNOG00000052990.1	Cers5	ceramide synthase 5 [Source:RGD Symbol;Acc:1311597]
ENSRNOT00000027818.5	925	726.767	3343	124.203	ENSRNOG00000020474.6	Pin1	peptidylprolyl cis/trans isomerase, NIMA-interacting 1 [Source:RGD Symbol;Acc:1310299]
ENSRNOT00000017601.6	963	764.767	3516.97	124.174	ENSRNOG00000013190.6	Rnaset2	ribonuclease T2 [Source:RGD Symbol;Acc:1309918]
ENSRNOT00000024310.3	2054	1855.77	8531	124.127	ENSRNOG00000017777.3	Ahcy	adenosylhomocysteinase [Source:RGD Symbol;Acc:69260]
ENSRNOT00000011105.5	3421	3222.77	14813	124.11	ENSRNOG00000007418.5	Ipo9	importin 9 [Source:RGD Symbol;Acc:1310537]
ENSRNOT00000016386.7	1518	1319.77	6058	123.943	ENSRNOG00000011933.7	Csnk2a2	casein kinase 2 alpha 2 [Source:RGD Symbol;Acc:1306882]
ENSRNOT00000024914.5	2451	2252.77	10315	123.636	ENSRNOG00000018457.6	Ptpa	protein phosphatase 2 phosphatase activator [Source:RGD Symbol;Acc:1308354]
ENSRNOT00000041264.3	2846	2647.77	12123.3	123.632	ENSRNOG00000010233.5	Cald1	caldesmon 1 [Source:RGD Symbol;Acc:2256]
ENSRNOT00000047861.4	1294	1095.77	5012.82	123.525	ENSRNOG00000029197.4	Diablo	diablo, IAP-binding mitochondrial protein [Source:RGD Symbol;Acc:1310885]
ENSRNOT00000015971.7	2632	2433.77	11131	123.495	ENSRNOG00000011910.7	Hnrnpr	heterogeneous nuclear ribonucleoprotein R [Source:RGD Symbol;Acc:631348]
ENSRNOT00000017740.6	1392	1193.77	5459.55	123.489	ENSRNOG00000013255.6	Dnajc8	DnaJ heat shock protein family (Hsp40) member C8 [Source:RGD Symbol;Acc:1306024]
ENSRNOT00000009402.6	3865	3666.77	16769	123.485	ENSRNOG00000006787.6	Dhcr24	24-dehydrocholesterol reductase [Source:RGD Symbol;Acc:1306529]
ENSRNOT00000020402.6	1937	1738.77	7951	123.473	ENSRNOG00000015128.6	Sae1	SUMO1 activating enzyme subunit 1 [Source:RGD Symbol;Acc:1306098]
ENSRNOT00000000253.4	1750	1551.77	7089	123.353	ENSRNOG00000000236.7	Zfp207	zinc finger protein 207 [Source:RGD Symbol;Acc:1308121]
ENSRNOT00000083876.1	1396	1197.77	5470.93	123.333	ENSRNOG00000057347.1	Cebpb	CCAAT/enhancer binding protein beta [Source:RGD Symbol;Acc:2327]
ENSRNOT00000017686.7	1463	1264.77	5776	123.313	ENSRNOG00000012966.7	Acadl	acyl-CoA dehydrogenase, long chain [Source:RGD Symbol;Acc:2011]
ENSRNOT00000007558.5	1672	1473.77	6730	123.304	ENSRNOG00000005276.6	Csnk2a1	casein kinase 2 alpha 1 [Source:RGD Symbol;Acc:621663]
ENSRNOT00000067376.3	795	596.767	2719	123.026	ENSRNOG00000008613.7	Gatad1	GATA zinc finger domain containing 1 [Source:RGD Symbol;Acc:1562004]
ENSRNOT00000064254.2	3228	3029.77	13803.7	123.021	ENSRNOG00000019534.7	Ap2a2	adaptor related protein complex 2 subunit alpha 2 [Source:RGD Symbol;Acc:71015]
ENSRNOT00000016152.6	3191	2992.77	13623	122.911	ENSRNOG00000012067.6	Fam111a	family with sequence similarity 111, member A [Source:RGD Symbol;Acc:1560913]
ENSRNOT00000079388.1	1550	1351.77	6140	122.647	ENSRNOG00000053196.1	Slc48a1	solute carrier family 48 member 1 [Source:RGD Symbol;Acc:1562880]
ENSRNOT00000024779.6	2458	2259.77	10264	122.643	ENSRNOG00000018255.6	Clptm1	CLPTM1 regulator of GABA type A receptor forward trafficking [Source:RGD Symbol;Acc:1310959]
ENSRNOT00000086459.1	2142	1943.77	8824	122.578	ENSRNOG00000060821.1	Rnf114	ring finger protein 114 [Source:RGD Symbol;Acc:1303139]
ENSRNOT00000056015.4	3238	3039.77	13797.9	122.565	ENSRNOG00000013538.7	Capza1	capping actin protein of muscle Z-line subunit alpha 1 [Source:RGD Symbol;Acc:1587438]
ENSRNOT00000031026.4	1137	938.767	4253.69	122.349	ENSRNOG00000024410.4	Blvrb	biliverdin reductase B [Source:RGD Symbol;Acc:1306080]
ENSRNOT00000067846.3	3114	2915.77	13211.5	122.346	ENSRNOG00000043210.4	Ppp3r1	protein phosphatase 3, regulatory subunit B, alpha [Source:RGD Symbol;Acc:69230]
ENSRNOT00000010700.6	1471	1272.77	5761	122.219	ENSRNOG00000008090.6	Txndc12	thioredoxin domain containing 12 [Source:RGD Symbol;Acc:1305960]
ENSRNOT00000027370.5	1658	1459.77	6605.68	122.187	ENSRNOG00000020213.5	Tubg1	tubulin, gamma 1 [Source:RGD Symbol;Acc:628606]
ENSRNOT00000033148.3	2320	2121.77	9600.3	122.174	ENSRNOG00000012084.5	Xpnpep1	X-prolyl aminopeptidase 1 [Source:RGD Symbol;Acc:621274]
ENSRNOT00000015518.4	1575	1376.77	6228	122.146	ENSRNOG00000011661.5	Hnrnph2	heterogeneous nuclear ribonucleoprotein H2 [Source:RGD Symbol;Acc:1549784]
ENSRNOT00000004319.3	1437	1238.77	5598	122.021	ENSRNOG00000003223.3	Degs1	delta(4)-desaturase, sphingolipid 1 [Source:RGD Symbol;Acc:70917]
ENSRNOT00000043736.2	2712	2513.77	11358	122.002	ENSRNOG00000038960.1	RGD1309362	similar to interferon-inducible GTPase [Source:RGD Symbol;Acc:1309362]
ENSRNOT00000024617.7	1664	1465.77	6622.24	121.992	ENSRNOG00000018184.8	Tpm1	tropomyosin 1 [Source:RGD Symbol;Acc:3898]
ENSRNOT00000083293.1	3332	3133.77	14144	121.87	ENSRNOG00000057623.1	Copb1	coatomer protein complex, subunit beta 1 [Source:RGD Symbol;Acc:620861]
ENSRNOT00000025018.4	1049	850.767	3838	121.811	ENSRNOG00000018391.4	Cdk2ap2	cyclin-dependent kinase 2 associated protein 2 [Source:RGD Symbol;Acc:1588883]
ENSRNOT00000067141.2	853	654.767	2953.14	121.783	ENSRNOG00000017905.8	Map1lc3b	microtubule-associated protein 1 light chain 3 beta [Source:RGD Symbol;Acc:621315]
ENSRNOT00000050289.5	652	453.837	2046.35	121.751	ENSRNOG00000030374.5	LOC100360750	Sm protein F-like [Source:RGD Symbol;Acc:2321508]
ENSRNOT00000007402.5	2497	2298.77	10360.5	121.696	ENSRNOG00000005505.6	Wbp11	WW domain binding protein 11 [Source:RGD Symbol;Acc:1307911]
ENSRNOT00000037339.5	3108	2909.77	13112.3	121.678	ENSRNOG00000032240.4	Gbp5	guanylate binding protein 5 [Source:RGD Symbol;Acc:1311040]
ENSRNOT00000004842.5	963	764.767	3446	121.668	ENSRNOG00000003546.5	Tnfrsf12a	TNF receptor superfamily member 12A [Source:RGD Symbol;Acc:631329]
ENSRNOT00000093558.1	603	404.968	1823.97	121.615	ENSRNOG00000019578.7	Rps16	ribosomal protein S16 [Source:RGD Symbol;Acc:621031]
ENSRNOT00000070812.1	2304	2105.77	9462	121.329	ENSRNOG00000046996.1	Pea15	proliferation and apoptosis adaptor protein 15 [Source:RGD Symbol;Acc:1306055]
ENSRNOT00000071737.2	1075	876.767	3926	120.909	ENSRNOG00000050578.2	Rheb	Ras homolog, mTORC1 binding [Source:RGD Symbol;Acc:621840]
ENSRNOT00000008893.7	2165	1966.77	8800.94	120.828	ENSRNOG00000006221.7	Uba3	ubiquitin-like modifier activating enzyme 3 [Source:RGD Symbol;Acc:621084]
ENSRNOT00000081249.1	2980	2781.77	12444.4	120.794	ENSRNOG00000055012.1	LOC108348078	ATP-dependent zinc metalloprotease YME1L1 [Source:RGD Symbol;Acc:11358998]
ENSRNOT00000022126.6	2453	2254.77	10080	120.712	ENSRNOG00000016265.7	Acsl5	acyl-CoA synthetase long-chain family member 5 [Source:RGD Symbol;Acc:69402]
ENSRNOT00000001054.4	3127	2928.77	13092.3	120.704	ENSRNOG00000000805.6	Gja1	gap junction protein, alpha 1 [Source:RGD Symbol;Acc:2690]
ENSRNOT00000046155.6	2787	2588.77	11567	120.648	ENSRNOG00000017023.8	Tcf25	transcription factor 25 [Source:RGD Symbol;Acc:1309054]
ENSRNOT00000028740.5	1961	1762.77	7873	120.597	ENSRNOG00000021166.7	Ecm1	extracellular matrix protein 1 [Source:RGD Symbol;Acc:620357]
ENSRNOT00000001215.6	2476	2277.77	10165.9	120.511	ENSRNOG00000000913.8	Gusb	glucuronidase, beta [Source:RGD Symbol;Acc:2772]
ENSRNOT00000001228.7	1160	961.767	4285.66	120.32	ENSRNOG00000000925.7	Psph	phosphoserine phosphatase [Source:RGD Symbol;Acc:1308764]
ENSRNOT00000025784.2	3458	3259.77	14505	120.15	ENSRNOG00000018824.2	Slc7a5	solute carrier family 7 member 5 [Source:RGD Symbol;Acc:620639]
ENSRNOT00000028900.6	1870	1671.77	7435	120.087	ENSRNOG00000021273.6	Crls1	cardiolipin synthase 1 [Source:RGD Symbol;Acc:1311037]
ENSRNOT00000001745.6	2091	1892.77	8400	119.832	ENSRNOG00000001293.6	Get4	guided entry of tail-anchored proteins factor 4 [Source:RGD Symbol;Acc:1311660]
ENSRNOT00000005611.5	2336	2137.77	9485.9	119.815	ENSRNOG00000004027.5	Aldh9a1	aldehyde dehydrogenase 9 family, member A1 [Source:RGD Symbol;Acc:68409]
ENSRNOT00000080956.1	396	204.419	906.977	119.802	ENSRNOG00000061442.1	AABR07068214.1
ENSRNOT00000015756.6	560	362.198	1606.88	119.792	ENSRNOG00000011817.6	Rpl22l1	ribosomal protein L22 like 1 [Source:RGD Symbol;Acc:1309517]
ENSRNOT00000021920.6	1206	1007.77	4463.42	119.591	ENSRNOG00000016000.6	Atp5pb	ATP synthase peripheral stalk-membrane subunit b [Source:RGD Symbol;Acc:620041]
ENSRNOT00000075083.2	1206	1007.77	4463.42	119.591	ENSRNOG00000046299.2	LOC100911417	ATP synthase subunit b, mitochondrial-like [Source:RGD Symbol;Acc:6493308]
ENSRNOT00000010893.6	2358	2159.77	9559.79	119.518	ENSRNOG00000022323.5	Tcea1	transcription elongation factor A1 [Source:RGD Symbol;Acc:1309880]
ENSRNOT00000084138.1	204	55.888	247	119.335	ENSRNOG00000056435.1	Cmc4	C-X9-C motif containing 4 [Source:RGD Symbol;Acc:7647017]
ENSRNOT00000019033.5	639	440.896	1945.63	119.156	ENSRNOG00000038106.2	AABR07026424.1	microtubule-associated protein 1 light chain 3 beta 2 [Source:NCBI gene;Acc:100359928]
ENSRNOT00000006357.5	1342	1143.77	5047	119.148	ENSRNOG00000004659.5	Creld2	cysteine-rich with EGF-like domains 2 [Source:RGD Symbol;Acc:1310614]
ENSRNOT00000039836.4	2147	1948.77	8599	119.146	ENSRNOG00000028103.5	Psmd3	proteasome 26S subunit, non-ATPase 3 [Source:RGD Symbol;Acc:1311470]
ENSRNOT00000087181.1	999	800.767	3533.12	119.136	ENSRNOG00000054775.1	Fkbp11	FKBP prolyl isomerase 11 [Source:RGD Symbol;Acc:1306161]
ENSRNOT00000032972.4	1873	1674.77	7389	119.13	ENSRNOG00000017259.7	Tacc3	transforming, acidic coiled-coil containing protein 3 [Source:RGD Symbol;Acc:1302948]
ENSRNOT00000049170.5	1899	1700.77	7496	119.008	ENSRNOG00000028956.5	Mbd3	methyl-CpG binding domain protein 3 [Source:RGD Symbol;Acc:1307389]
ENSRNOT00000064588.4	2443	2244.77	9890.93	118.975	ENSRNOG00000024213.6	Golim4	golgi integral membrane protein 4 [Source:RGD Symbol;Acc:1310948]
ENSRNOT00000041606.3	1814	1615.77	7115.87	118.916	ENSRNOG00000003338.6	Pmp22	peripheral myelin protein 22 [Source:RGD Symbol;Acc:3359]
ENSRNOT00000012258.3	1873	1674.77	7372.02	118.857	ENSRNOG00000009248.4	Pnrc2	proline-rich nuclear receptor coactivator 2 [Source:RGD Symbol;Acc:1642418]
ENSRNOT00000087532.1	156	30.2447	133	118.739	ENSRNOG00000061301.1	AC096239.3
ENSRNOT00000083557.1	732	533.804	2347	118.72	ENSRNOG00000053172.1	Ssr4	signal sequence receptor subunit 4 [Source:RGD Symbol;Acc:62034]
ENSRNOT00000087748.1	4395	4196.77	18446	118.68	ENSRNOG00000057451.1	Itga5	integrin subunit alpha 5 [Source:RGD Symbol;Acc:2925]
ENSRNOT00000093499.1	1731	1532.77	6720.39	118.389	ENSRNOG00000030118.7	Msn	moesin [Source:RGD Symbol;Acc:621260]
ENSRNOT00000028881.2	2142	1943.77	8506	118.16	ENSRNOG00000021259.2	Prnp	prion protein [Source:RGD Symbol;Acc:3410]
ENSRNOT00000077236.1	1131	932.767	4078.79	118.073	ENSRNOG00000020667.7	Shisa5	shisa family member 5 [Source:RGD Symbol;Acc:1359661]
ENSRNOT00000020785.5	3205	3006.77	13140	118.001	ENSRNOG00000015409.5	Usp5	ubiquitin specific peptidase 5 [Source:RGD Symbol;Acc:1308438]
ENSRNOT00000075573.2	588	390.047	1704	117.962	ENSRNOG00000046644.2	Prelid3b	PRELI domain containing 3B [Source:RGD Symbol;Acc:1594395]
ENSRNOT00000072342.2	958	759.767	3317.69	117.909	ENSRNOG00000049743.2	Gstm5	glutathione S-transferase, mu 5 [Source:RGD Symbol;Acc:61964]
ENSRNOT00000012883.4	2726	2527.77	11033	117.855	ENSRNOG00000009550.7	Sqle	squalene epoxidase [Source:RGD Symbol;Acc:3755]
ENSRNOT00000005910.4	1462	1263.77	5509	117.706	ENSRNOG00000004284.4	Btg1	BTG anti-proliferation factor 1 [Source:RGD Symbol;Acc:2224]
ENSRNOT00000025952.4	767	568.767	2477.8	117.632	ENSRNOG00000018691.7	Aurkaip1	aurora kinase A interacting protein 1 [Source:RGD Symbol;Acc:1303211]
ENSRNOT00000079726.1	4731	4532.77	19741	117.597	ENSRNOG00000056069.1	Kif11	kinesin family member 11 [Source:RGD Symbol;Acc:621258]
ENSRNOT00000090987.1	4405	4206.77	18309.7	117.523	ENSRNOG00000059474.1	Mob1a	MOB kinase activator 1A [Source:RGD Symbol;Acc:1307014]
ENSRNOT00000017071.7	1454	1255.77	5464.75	117.504	ENSRNOG00000012681.9	Lgals9	galectin 9 [Source:RGD Symbol;Acc:3005]
ENSRNOT00000026507.5	717	518.821	2256.61	117.444	ENSRNOG00000019551.5	Psmb6	proteasome 20S subunit beta 6 [Source:RGD Symbol;Acc:61881]
ENSRNOT00000064452.2	2577	2378.77	10336	117.325	ENSRNOG00000007284.7	Slc2a1	solute carrier family 2 member 1 [Source:RGD Symbol;Acc:3704]
ENSRNOT00000017927.7	2862	2663.77	11565.1	117.232	ENSRNOG00000012975.7	Ggcx	gamma-glutamyl carboxylase [Source:RGD Symbol;Acc:68383]
ENSRNOT00000074804.2	643	444.896	1930.4	117.16	ENSRNOG00000050827.2	NEWGENE_1310561	programmed cell death 5 [Source:RGD Symbol;Acc:11480964]
ENSRNOT00000061526.2	315	134.378	582.842	117.116	ENSRNOG00000040024.2	AABR07028805.1
ENSRNOT00000005124.7	1692	1493.77	6479	117.116	ENSRNOG00000003853.7	Scoc	short coiled-coil protein [Source:RGD Symbol;Acc:1311860]
ENSRNOT00000005126.6	3007	2808.77	12168	116.975	ENSRNOG00000003844.6	Dhx15	DEAH-box helicase 15 [Source:RGD Symbol;Acc:1308072]
ENSRNOT00000077163.1	1634	1435.77	6216.59	116.912	ENSRNOG00000015019.6	Spg21	SPG21 abhydrolase domain containing, maspardin [Source:RGD Symbol;Acc:1359141]
ENSRNOT00000035383.5	1142	943.767	4083.39	116.828	ENSRNOG00000019620.7	Pmf1	polyamine-modulated factor 1 [Source:RGD Symbol;Acc:1584694]
ENSRNOT00000012533.6	3258	3059.77	13238	116.822	ENSRNOG00000009006.6	Ccdc47	coiled-coil domain containing 47 [Source:RGD Symbol;Acc:1308813]
ENSRNOT00000018248.6	967	768.767	3325	116.785	ENSRNOG00000013507.7	Selenot	selenoprotein T [Source:RGD Symbol;Acc:1359128]
ENSRNOT00000012101.6	1294	1095.77	4736	116.704	ENSRNOG00000009080.6	Atp6v1d	ATPase H+ transporting V1 subunit D [Source:RGD Symbol;Acc:735119]
ENSRNOT00000000749.6	727	528.804	2284	116.625	ENSRNOG00000000610.6	Cisd1	CDGSH iron sulfur domain 1 [Source:RGD Symbol;Acc:1309529]
ENSRNOT00000026989.4	1358	1159.77	5009	116.62	ENSRNOG00000019934.4	Paip2	poly(A) binding protein interacting protein 2 [Source:RGD Symbol;Acc:1359176]
ENSRNOT00000084069.1	870	671.767	2900.38	116.581	ENSRNOG00000005668.7	Ndufa8	NADH:ubiquinone oxidoreductase subunit A8 [Source:RGD Symbol;Acc:1306283]
ENSRNOT00000016563.5	7714	7515.77	32432	116.518	ENSRNOG00000012271.5	Cnot1	CCR4-NOT transcription complex, subunit 1 [Source:RGD Symbol;Acc:1308009]
ENSRNOT00000015468.5	2911	2712.77	11696	116.417	ENSRNOG00000011592.5	Lrp10	LDL receptor related protein 10 [Source:RGD Symbol;Acc:1310471]
ENSRNOT00000020544.7	1349	1150.77	4957	116.312	ENSRNOG00000015233.7	Etfa	electron transfer flavoprotein subunit alpha [Source:RGD Symbol;Acc:628747]
ENSRNOT00000010300.7	1417	1218.77	5244.16	116.184	ENSRNOG00000007504.7	Actr10	actin related protein 10 [Source:RGD Symbol;Acc:1306515]
ENSRNOT00000023562.6	1701	1502.77	6466	116.181	ENSRNOG00000017396.6	Marchf5	membrane associated ring-CH-type finger 5 [Source:RGD Symbol;Acc:1305617]
ENSRNOT00000023350.6	2137	1938.77	8339.96	116.153	ENSRNOG00000017291.6	Sord	sorbitol dehydrogenase [Source:RGD Symbol;Acc:3734]
ENSRNOT00000082239.1	1823	1624.77	6988.43	116.139	ENSRNOG00000011498.6	Psip1	PC4 and SFRS1 interacting protein 1 [Source:RGD Symbol;Acc:631439]
ENSRNOT00000079709.1	912	713.767	3065.34	115.961	ENSRNOG00000058658.1	Mtch2	mitochondrial carrier 2 [Source:RGD Symbol;Acc:1308080]
ENSRNOT00000047163.4	709	510.821	2193.35	115.939	ENSRNOG00000029813.4	AABR07035218.1
ENSRNOT00000022495.7	635	436.911	1874	115.816	ENSRNOG00000016723.7	Phpt1	phosphohistidine phosphatase 1 [Source:RGD Symbol;Acc:1311355]
ENSRNOT00000078434.1	1927	1728.77	7412.53	115.777	ENSRNOG00000001964.7	Cd47	Cd47 molecule [Source:RGD Symbol;Acc:2308]
ENSRNOT00000009497.5	3747	3548.77	15206	115.699	ENSRNOG00000007177.5	Poglut3	protein O-glucosyltransferase 3 [Source:RGD Symbol;Acc:1562027]
ENSRNOT00000072387.1	873	674.767	2890	115.647	ENSRNOG00000050819.1	Birc5	baculoviral IAP repeat-containing 5 [Source:RGD Symbol;Acc:70499]
ENSRNOT00000061878.4	3250	3051.77	13070	115.642	ENSRNOG00000006130.7	Rab5b	RAB5B, member RAS oncogene family [Source:RGD Symbol;Acc:1306489]
ENSRNOT00000025608.4	1927	1728.77	7398.96	115.565	ENSRNOG00000018945.4	Nutf2	nuclear transport factor 2 [Source:RGD Symbol;Acc:1359213]
ENSRNOT00000083806.1	1549	1350.77	5779.41	115.53	ENSRNOG00000006987.6	Tmem263	transmembrane protein 263 [Source:RGD Symbol;Acc:1563325]
ENSRNOT00000074814.1	1103	904.767	3870	115.496	ENSRNOG00000048622.1	Sin3b	SIN3 transcription regulator family member B [Source:RGD Symbol;Acc:1587989]
ENSRNOT00000003412.3	2238	2039.77	8716	115.379	ENSRNOG00000002520.5	Litaf	lipopolysaccharide-induced TNF factor [Source:RGD Symbol;Acc:69294]
ENSRNOT00000046490.3	1755	1556.77	6643.75	115.234	ENSRNOG00000010756.7	Tp53	tumor protein p53 [Source:RGD Symbol;Acc:3889]
ENSRNOT00000028589.4	1404	1205.77	5138	115.059	ENSRNOG00000021042.6	Psmd4	proteasome 26S subunit, non-ATPase 4 [Source:RGD Symbol;Acc:621109]
ENSRNOT00000015535.8	1581	1382.77	5890.96	115.035	ENSRNOG00000011452.8	Aldoc	aldolase, fructose-bisphosphate C [Source:RGD Symbol;Acc:2091]
ENSRNOT00000090989.1	2697	2498.77	10633.6	114.907	ENSRNOG00000047374.2	Gnas	GNAS complex locus [Source:RGD Symbol;Acc:2716]
ENSRNOT00000009175.6	1776	1577.77	6713	114.885	ENSRNOG00000006929.6	Hnrnpll	heterogeneous nuclear ribonucleoprotein L-like [Source:RGD Symbol;Acc:1305861]
ENSRNOT00000017588.6	553	355.246	1511	114.849	ENSRNOG00000013118.6	Atox1	antioxidant 1 copper chaperone [Source:RGD Symbol;Acc:621684]
ENSRNOT00000044171.2	1849	1650.77	7021	114.843	ENSRNOG00000032297.2	Msmo1	methylsterol monooxygenase 1 [Source:RGD Symbol;Acc:620281]
ENSRNOT00000022117.4	1979	1780.77	7572	114.814	ENSRNOG00000016207.4	Galnt1	polypeptide N-acetylgalactosaminyltransferase 1 [Source:RGD Symbol;Acc:620358]
ENSRNOT00000000052.4	1810	1611.77	6842	114.623	ENSRNOG00000000047.4	Cd82	Cd82 molecule [Source:RGD Symbol;Acc:69070]
ENSRNOT00000007771.3	2640	2441.77	10359	114.553	ENSRNOG00000005413.5	Creb3l1	cAMP responsive element binding protein 3-like 1 [Source:RGD Symbol;Acc:1359613]
ENSRNOT00000028628.7	3374	3175.77	13459.6	114.439	ENSRNOG00000021085.8	Sf1	splicing factor 1 [Source:RGD Symbol;Acc:620645]
ENSRNOT00000050373.4	2140	1941.77	8228.43	114.422	ENSRNOG00000000798.6	Gnl1	G protein nucleolar 1 [Source:RGD Symbol;Acc:1303051]
ENSRNOT00000003173.7	1643	1444.77	6120.88	114.395	ENSRNOG00000002292.8	Hnrnpd	heterogeneous nuclear ribonucleoprotein D [Source:RGD Symbol;Acc:620365]
ENSRNOT00000006168.7	1565	1366.77	5790	114.387	ENSRNOG00000004505.7	Nfic	nuclear factor I/C [Source:RGD Symbol;Acc:62016]
ENSRNOT00000073104.2	1311	1112.77	4709.99	114.29	ENSRNOG00000045790.2	Fam50a	family with sequence similarity 50, member A [Source:RGD Symbol;Acc:1560964]
ENSRNOT00000011653.6	761	562.785	2382	114.285	ENSRNOG00000008794.6	Ube2e1	ubiquitin-conjugating enzyme E2E 1 [Source:RGD Symbol;Acc:2324438]
ENSRNOT00000079866.1	4473	4274.77	18087.9	114.253	ENSRNOG00000055583.1	Ttyh3	tweety family member 3 [Source:RGD Symbol;Acc:1309549]
ENSRNOT00000019601.8	3369	3170.77	13409.1	114.189	ENSRNOG00000014343.8	Anln	anillin, actin binding protein [Source:RGD Symbol;Acc:1561367]
ENSRNOT00000064925.2	1192	993.767	4202	114.173	ENSRNOG00000007992.6	Srsf10	serine and arginine rich splicing factor 10 [Source:RGD Symbol;Acc:1311067]
ENSRNOT00000074695.2	2001	1802.77	7621	114.147	ENSRNOG00000049683.2	Sh3gl1	SH3 domain containing GRB2 like 1, endophilin A2 [Source:RGD Symbol;Acc:708456]
ENSRNOT00000027721.6	1496	1297.77	5471	113.831	ENSRNOG00000020452.7	Nsmce4a	NSE4 homolog A, SMC5-SMC6 complex component [Source:RGD Symbol;Acc:1309025]
ENSRNOT00000093740.1	1628	1429.77	6024.53	113.775	ENSRNOG00000032034.7	Supt5h	SPT5 homolog, DSIF elongation factor subunit [Source:RGD Symbol;Acc:1563807]
ENSRNOT00000073790.2	847	648.767	2733	113.748	ENSRNOG00000049780.2	Sri	sorcin [Source:RGD Symbol;Acc:1584485]
ENSRNOT00000079106.1	2191	1992.77	8392.99	113.724	ENSRNOG00000021824.5	Dnajb1	DnaJ heat shock protein family (Hsp40) member B1 [Source:RGD Symbol;Acc:1304725]
ENSRNOT00000039132.3	680	481.821	2027	113.595	ENSRNOG00000027126.6	Dpy30	dpy-30 histone methyltransferase complex regulatory subunit [Source:RGD Symbol;Acc:708575]
ENSRNOT00000005138.6	2181	1982.77	8337	113.535	ENSRNOG00000003858.6	Atp6ap2	ATPase H+ transporting accessory protein 2 [Source:RGD Symbol;Acc:1561269]
ENSRNOT00000080836.1	1237	1038.77	4363.15	113.416	ENSRNOG00000010676.7	Smarce1	SWI/SNF related, matrix associated, actin dependent regulator of chromatin, subfamily e, member 1 [Source:RGD Symbol;Acc:1304726]
ENSRNOT00000078578.1	1798	1599.77	6717.53	113.382	ENSRNOG00000019485.6	Bckdk	branched chain ketoacid dehydrogenase kinase [Source:RGD Symbol;Acc:2198]
ENSRNOT00000001664.6	633	434.911	1824.66	113.285	ENSRNOG00000001239.6	Ddt	D-dopachrome tautomerase [Source:RGD Symbol;Acc:61923]
ENSRNOT00000038649.6	2948	2749.77	11533	113.25	ENSRNOG00000024629.6	Hadha	hydroxyacyl-CoA dehydrogenase trifunctional multienzyme complex subunit alpha [Source:RGD Symbol;Acc:620512]
ENSRNOT00000018190.4	973	774.767	3249	113.232	ENSRNOG00000013454.4	Rala	RAS like proto-oncogene A [Source:RGD Symbol;Acc:619851]
ENSRNOT00000008149.5	2794	2595.77	10875	113.124	ENSRNOG00000006048.6	Ezh2	enhancer of zeste 2 polycomb repressive complex 2 subunit [Source:RGD Symbol;Acc:1595860]
ENSRNOT00000073317.2	777	578.767	2419.62	112.885	ENSRNOG00000049622.2	LOC103690013	H/ACA ribonucleoprotein complex subunit 2 [Source:RGD Symbol;Acc:9459675]
ENSRNOT00000026964.7	2671	2472.77	10329.3	112.792	ENSRNOG00000019848.7	Rbm39	RNA binding motif protein 39 [Source:RGD Symbol;Acc:1310071]
ENSRNOT00000056551.4	819	620.767	2591.64	112.73	ENSRNOG00000037371.5	Xaf1	XIAP associated factor 1 [Source:RGD Symbol;Acc:1585988]
ENSRNOT00000085273.1	1644	1445.77	6029.68	112.613	ENSRNOG00000061312.1	Phf10	PHD finger protein 10 [Source:RGD Symbol;Acc:1305266]
ENSRNOT00000080887.1	2380	2181.77	9089	112.486	ENSRNOG00000056728.1	G6pd	glucose-6-phosphate dehydrogenase [Source:RGD Symbol;Acc:2645]
ENSRNOT00000019735.5	1531	1332.77	5552	112.483	ENSRNOG00000014485.5	Pdcd6	programmed cell death 6 [Source:RGD Symbol;Acc:1311239]
ENSRNOT00000026567.5	911	712.767	2968	112.437	ENSRNOG00000019572.5	Lsm4	LSM4 homolog, U6 small nuclear RNA and mRNA degradation associated [Source:RGD Symbol;Acc:1306808]
ENSRNOT00000011455.6	1308	1109.77	4619	112.385	ENSRNOG00000008277.6	Bag1	Bcl2 associated athanogene 1 [Source:RGD Symbol;Acc:1305203]
ENSRNOT00000022676.6	1984	1785.77	7430.31	112.35	ENSRNOG00000016486.6	Nop58	NOP58 ribonucleoprotein [Source:RGD Symbol;Acc:620484]
ENSRNOT00000065229.2	4008	3809.77	15839	112.259	ENSRNOG00000007462.7	Septin8	septin 8 [Source:RGD Symbol;Acc:1308449]
ENSRNOT00000019529.6	2187	1988.77	8264.37	112.206	ENSRNOG00000014562.6	Hnrnpf	heterogeneous nuclear ribonucleoprotein F [Source:RGD Symbol;Acc:620366]
ENSRNOT00000025629.7	2237	2038.77	8460	112.045	ENSRNOG00000018815.7	Plk1	polo-like kinase 1 [Source:RGD Symbol;Acc:3352]
ENSRNOT00000021671.5	4257	4058.77	16832	111.978	ENSRNOG00000015713.5	Parva	parvin, alpha [Source:RGD Symbol;Acc:71021]
ENSRNOT00000021711.5	3379	3180.77	13186	111.937	ENSRNOG00000015843.5	Itfg1	integrin alpha FG-GAP repeat containing 1 [Source:RGD Symbol;Acc:619898]
ENSRNOT00000013043.6	2562	2363.77	9784.87	111.774	ENSRNOG00000009754.6	Nampt	nicotinamide phosphoribosyltransferase [Source:RGD Symbol;Acc:631365]
ENSRNOT00000068078.2	1164	965.767	3997	111.751	ENSRNOG00000003809.7	Sat1	spermidine/spermine N1-acetyl transferase 1 [Source:RGD Symbol;Acc:1586174]
ENSRNOT00000026760.4	4428	4229.77	17504	111.741	ENSRNOG00000019742.5	Stat3	signal transducer and activator of transcription 3 [Source:RGD Symbol;Acc:3772]
ENSRNOT00000005677.3	1952	1753.77	7256	111.716	ENSRNOG00000004111.3	Soat1	sterol O-acyltransferase 1 [Source:RGD Symbol;Acc:621641]
ENSRNOT00000028988.2	486	289.39	1195.85	111.58	ENSRNOG00000023387.5	LOC100912599	NADH dehydrogenase [ubiquinone] iron-sulfur protein 6, mitochondrial-like [Source:RGD Symbol;Acc:6485961]
ENSRNOT00000072206.2	486	289.39	1195.85	111.58	ENSRNOG00000049394.3	LOC679739	NADH dehydrogenase (ubiquinone) Fe-S protein 6 [Source:RGD Symbol;Acc:1584802]
ENSRNOT00000060765.4	1794	1595.77	6594	111.576	ENSRNOG00000006384.7	Ddx58	DEXD/H-box helicase 58 [Source:RGD Symbol;Acc:1309460]
ENSRNOT00000013625.5	2917	2718.77	11217.9	111.412	ENSRNOG00000009997.5	Erap1	endoplasmic reticulum aminopeptidase 1 [Source:RGD Symbol;Acc:708542]
ENSRNOT00000010318.7	1836	1637.77	6755.81	111.382	ENSRNOG00000007775.7	Cmpk1	cytidine/uridine monophosphate kinase 1 [Source:RGD Symbol;Acc:1310116]
ENSRNOT00000028066.5	2643	2444.77	10084	111.375	ENSRNOG00000020679.6	Icam1	intercellular adhesion molecule 1 [Source:RGD Symbol;Acc:2857]
ENSRNOT00000092487.1	560	362.198	1493.53	111.342	ENSRNOG00000001009.7	Bri3	brain protein I3 [Source:RGD Symbol;Acc:1309187]
ENSRNOT00000075725.2	570	372.161	1533	111.225	ENSRNOG00000047934.2	RGD1566359	similar to RIKEN cDNA B230219D22 [Source:RGD Symbol;Acc:1566359]
ENSRNOT00000089612.1	3130	2931.77	12067	111.138	ENSRNOG00000060154.1	Ddx23	DEAD-box helicase 23 [Source:RGD Symbol;Acc:1308685]
ENSRNOT00000008964.4	898	699.767	2880	111.13	ENSRNOG00000006500.6	Snf8	SNF8 subunit of ESCRT-II [Source:RGD Symbol;Acc:1310144]
ENSRNOT00000049538.3	2714	2515.77	10353	111.119	ENSRNOG00000030633.3	Lmf2	lipase maturation factor 2 [Source:RGD Symbol;Acc:1306274]
ENSRNOT00000012454.5	1549	1350.77	5551	110.964	ENSRNOG00000009334.5	Knstrn	kinetochore-localized astrin/SPAG5 binding protein [Source:RGD Symbol;Acc:1303240]
ENSRNOT00000065093.3	723	524.804	2156	110.928	ENSRNOG00000043044.3	Cnn2	calponin 2 [Source:RGD Symbol;Acc:1589807]
ENSRNOT00000037181.5	1878	1679.77	6892	110.787	ENSRNOG00000029191.4	LOC685067	similar to guanylate binding protein family, member 6 [Source:RGD Symbol;Acc:1583235]
ENSRNOT00000001954.3	1604	1405.77	5767.62	110.783	ENSRNOG00000001436.5	Ywhag	tyrosine 3-monooxygenase/tryptophan 5-monooxygenase activation protein, gamma [Source:RGD Symbol;Acc:62002]
ENSRNOT00000025791.5	3610	3411.77	13978	110.626	ENSRNOG00000018704.5	Nolc1	nucleolar and coiled-body phosphoprotein 1 [Source:RGD Symbol;Acc:621578]
ENSRNOT00000048843.5	2744	2545.77	10415.8	110.476	ENSRNOG00000014969.7	Lzts2	leucine zipper tumor suppressor 2 [Source:RGD Symbol;Acc:1359249]
ENSRNOT00000087192.1	2453	2254.77	9221.94	110.436	ENSRNOG00000019222.7	Tfdp1	transcription factor Dp-1 [Source:RGD Symbol;Acc:1560344]
ENSRNOT00000056289.3	2037	1838.77	7512.84	110.324	ENSRNOG00000023816.5	Aph1a	aph-1 homolog A, gamma secretase subunit [Source:RGD Symbol;Acc:1311546]
ENSRNOT00000026091.4	3145	2946.77	12020	110.141	ENSRNOG00000019152.4	Trpc4ap	transient receptor potential cation channel, subfamily C, member 4 associated protein [Source:RGD Symbol;Acc:1309914]
ENSRNOT00000083191.1	550	352.293	1436	110.063	ENSRNOG00000056148.1	Nudcd3	NudC domain containing 3 [Source:RGD Symbol;Acc:1642416]
ENSRNOT00000039280.5	2381	2182.77	8896.4	110.052	ENSRNOG00000050805.2	LOC102550456	TSC22 domain family protein 4-like [Source:RGD Symbol;Acc:7605479]
ENSRNOT00000089874.1	1487	1288.77	5252	110.038	ENSRNOG00000058053.1	Ube2n	ubiquitin-conjugating enzyme E2N [Source:RGD Symbol;Acc:621096]
ENSRNOT00000089487.1	723	524.804	2137	109.951	ENSRNOG00000052004.1	Txnl4a	thioredoxin-like 4A [Source:RGD Symbol;Acc:6492735]
ENSRNOT00000027141.5	2988	2789.77	11356	109.913	ENSRNOG00000019913.5	Mta2	metastasis associated 1 family, member 2 [Source:RGD Symbol;Acc:1306743]
ENSRNOT00000090554.1	816	617.767	2514.41	109.901	ENSRNOG00000003846.7	Pitpna	phosphatidylinositol transfer protein, alpha [Source:RGD Symbol;Acc:61885]
ENSRNOT00000003473.6	549	351.293	1429	109.838	ENSRNOG00000002575.6	Sap30l	SAP30-like [Source:RGD Symbol;Acc:1309585]
ENSRNOT00000003586.5	1526	1327.77	5394.63	109.706	ENSRNOG00000002572.5	Cacybp	calcyclin binding protein [Source:RGD Symbol;Acc:1303146]
ENSRNOT00000027811.3	2701	2502.77	10167	109.689	ENSRNOG00000020475.3	Sart1	spliceosome associated factor 1, recruiter of U4/U6.U5 tri-snRNP [Source:RGD Symbol;Acc:61930]
ENSRNOT00000016288.5	3803	3604.77	14633	109.609	ENSRNOG00000011953.5	Supt16h	SPT16 homolog, facilitates chromatin remodeling subunit [Source:RGD Symbol;Acc:1310032]
ENSRNOT00000016237.3	2456	2257.77	9165.01	109.609	ENSRNOG00000011771.3	Ptp4a1	protein tyrosine phosphatase 4A1 [Source:RGD Symbol;Acc:61970]
ENSRNOT00000026551.5	488	291.312	1182	109.56	ENSRNOG00000019552.5	Lsm7	LSM7 homolog, U6 small nuclear RNA and mRNA degradation associated [Source:RGD Symbol;Acc:1305354]
ENSRNOT00000027937.5	1519	1320.77	5356	109.498	ENSRNOG00000037580.2	Psmd8	proteasome 26S subunit, non-ATPase 8 [Source:RGD Symbol;Acc:1309842]
ENSRNOT00000089040.1	1565	1366.77	5542.16	109.49	ENSRNOG00000060571.1	Tmem189	transmembrane protein 189 [Source:RGD Symbol;Acc:1309093]
ENSRNOT00000008566.5	2269	2070.77	8396	109.479	ENSRNOG00000005923.6	Mtmr2	myotubularin related protein 2 [Source:RGD Symbol;Acc:1311865]
ENSRNOT00000038178.4	1886	1687.77	6838	109.398	ENSRNOG00000027552.4	Tapbpl	TAP binding protein-like [Source:RGD Symbol;Acc:1307893]
ENSRNOT00000080351.1	2039	1840.77	7453	109.326	ENSRNOG00000057284.1	Cenpb	centromere protein B [Source:RGD Symbol;Acc:1304794]
ENSRNOT00000089076.1	969	770.767	3119.95	109.299	ENSRNOG00000052981.1	AABR07058464.1
ENSRNOT00000021358.2	1393	1194.77	4829.47	109.146	ENSRNOG00000015936.2	LOC108349548	guanine nucleotide-binding protein G(I)/G(S)/G(O) subunit gamma-5 [Source:RGD Symbol;Acc:11485321]
ENSRNOT00000006297.5	696	497.821	2012	109.13	ENSRNOG00000004723.5	Fcf1	FCF1 rRNA-processing protein [Source:RGD Symbol;Acc:1310899]
ENSRNOT00000089814.1	2304	2105.77	8491.48	108.884	ENSRNOG00000056870.1	Gdi1	GDP dissociation inhibitor 1 [Source:RGD Symbol;Acc:2676]
ENSRNOT00000018021.5	6153	5954.77	24000	108.827	ENSRNOG00000012002.6	Iqgap1	IQ motif containing GTPase activating protein 1 [Source:RGD Symbol;Acc:1311884]
ENSRNOT00000047078.4	354	167.16	673.096	108.726	ENSRNOG00000051416.1	AABR07071000.1
ENSRNOT00000025284.7	3857	3658.77	14732	108.722	ENSRNOG00000018304.7	Lars1	leucyl-tRNA synthetase 1 [Source:RGD Symbol;Acc:1304962]
ENSRNOT00000002462.6	1927	1728.77	6958	108.677	ENSRNOG00000001803.6	Dnajb11	DnaJ heat shock protein family (Hsp40) member B11 [Source:RGD Symbol;Acc:1307373]
ENSRNOT00000001654.7	3377	3178.77	12790.3	108.646	ENSRNOG00000001235.7	Gna12	G protein subunit alpha 12 [Source:RGD Symbol;Acc:71018]
ENSRNOT00000039991.4	644	445.882	1794	108.641	ENSRNOG00000019701.6	RGD1597339	uncharacterized protein LOC690349 [Source:RGD Symbol;Acc:1597339]
ENSRNOT00000068524.4	3053	2854.77	11483.7	108.618	ENSRNOG00000002319.9	Tsn	translin [Source:RGD Symbol;Acc:621107]
ENSRNOT00000085725.1	1291	1092.77	4393.08	108.551	ENSRNOG00000010895.6	Tmem30a	transmembrane protein 30A [Source:RGD Symbol;Acc:1303315]
ENSRNOT00000079456.1	17592	17393.8	69879	108.479	ENSRNOG00000057569.1	Ahnak	AHNAK nucleoprotein [Source:RGD Symbol;Acc:619779]
ENSRNOT00000016112.7	1630	1431.77	5751	108.458	ENSRNOG00000011853.7	Mbd2	methyl-CpG binding domain protein 2 [Source:RGD Symbol;Acc:1595452]
ENSRNOT00000064116.1	1285	1086.77	4365	108.452	ENSRNOG00000003829.6	Ap3s1	adaptor related protein complex 3 subunit sigma 1 [Source:RGD Symbol;Acc:1311115]
ENSRNOT00000005551.4	2025	1826.77	7331	108.361	ENSRNOG00000004143.4	Adipor1	adiponectin receptor 1 [Source:RGD Symbol;Acc:1303151]
ENSRNOT00000071922.2	996	797.767	3199.76	108.301	ENSRNOG00000047185.2	Eif3i	eukaryotic translation initiation factor 3, subunit I [Source:RGD Symbol;Acc:1584560]
ENSRNOT00000034924.5	1752	1553.77	6231.13	108.286	ENSRNOG00000012237.6	Rdx	radixin [Source:RGD Symbol;Acc:1359472]
ENSRNOT00000001637.4	1569	1370.77	5494	108.222	ENSRNOG00000038489.3	Sumo3	small ubiquitin-like modifier 3 [Source:RGD Symbol;Acc:1561022]
ENSRNOT00000027809.7	950	751.767	3013	108.22	ENSRNOG00000037247.4	Rras	RAS related [Source:RGD Symbol;Acc:1311443]
ENSRNOT00000000586.7	1072	873.767	3500	108.159	ENSRNOG00000000493.7	Snrpc	small nuclear ribonucleoprotein polypeptide C [Source:RGD Symbol;Acc:1306065]
ENSRNOT00000082628.1	2769	2570.77	10283	108.006	ENSRNOG00000060912.1	Qars1	glutaminyl-tRNA synthetase 1 [Source:RGD Symbol;Acc:1359448]
ENSRNOT00000017472.7	900	701.767	2805.86	107.961	ENSRNOG00000012999.7	Phb2	prohibitin 2 [Source:RGD Symbol;Acc:620203]
ENSRNOT00000001600.6	2786	2587.77	10343.8	107.931	ENSRNOG00000028814.4	Oasl2	2'-5' oligoadenylate synthetase-like 2 [Source:RGD Symbol;Acc:1307351]
ENSRNOT00000001392.8	2430	2231.77	8914.34	107.853	ENSRNOG00000001050.8	Eif2ak1	eukaryotic translation initiation factor 2 alpha kinase 1 [Source:RGD Symbol;Acc:70883]
ENSRNOT00000068134.3	3385	3186.77	12728.8	107.852	ENSRNOG00000002045.7	Anxa3	annexin A3 [Source:RGD Symbol;Acc:2119]
ENSRNOT00000039572.3	1296	1097.77	4381	107.759	ENSRNOG00000023079.3	Nras	NRAS proto-oncogene, GTPase [Source:RGD Symbol;Acc:3205]
ENSRNOT00000041106.5	3419	3220.77	12843	107.671	ENSRNOG00000029028.5	Mknk2	MAPK interacting serine/threonine kinase 2 [Source:RGD Symbol;Acc:1305728]
ENSRNOT00000002883.6	1704	1505.77	6003.31	107.653	ENSRNOG00000026504.5	Fam114a1	family with sequence similarity 114, member A1 [Source:RGD Symbol;Acc:1560201]
ENSRNOT00000077799.1	927	728.767	2903.42	107.575	ENSRNOG00000013930.7	Rnf4	ring finger protein 4 [Source:RGD Symbol;Acc:3583]
ENSRNOT00000006890.7	891	692.767	2759	107.536	ENSRNOG00000005123.7	Emc2	ER membrane protein complex subunit 2 [Source:RGD Symbol;Acc:1310430]
ENSRNOT00000077275.1	2112	1913.77	7620.93	107.525	ENSRNOG00000059579.1	Gpt2	glutamic--pyruvic transaminase 2 [Source:RGD Symbol;Acc:1305462]
ENSRNOT00000019620.4	1255	1056.77	4206	107.469	ENSRNOG00000014270.4	Rer1	retention in endoplasmic reticulum sorting receptor 1 [Source:RGD Symbol;Acc:1306324]
ENSRNOT00000091702.1	4354	4155.77	16531.2	107.41	ENSRNOG00000059801.1	Lima1	LIM domain and actin binding 1 [Source:RGD Symbol;Acc:1564050]
ENSRNOT00000031788.5	739	540.804	2145.34	107.114	ENSRNOG00000028640.7	Siva1	SIVA1, apoptosis-inducing factor [Source:RGD Symbol;Acc:1561872]
ENSRNOT00000054830.2	3232	3033.77	12030	107.072	ENSRNOG00000043503.2	Ehd1	EH-domain containing 1 [Source:RGD Symbol;Acc:1309017]
ENSRNOT00000029266.5	2549	2350.77	9317	107.018	ENSRNOG00000024650.5	Ckap2	cytoskeleton associated protein 2 [Source:RGD Symbol;Acc:1311631]
ENSRNOT00000047043.4	312	131.903	522.73	107.007	ENSRNOG00000040101.3	AABR07026805.2
ENSRNOT00000061070.4	2526	2327.77	9222	106.974	ENSRNOG00000004726.7	Mapkapk2	MAPK activated protein kinase 2 [Source:RGD Symbol;Acc:631362]
ENSRNOT00000009645.5	3510	3311.77	13120	106.971	ENSRNOG00000007088.6	Xpot	exportin for tRNA [Source:RGD Symbol;Acc:1305562]
ENSRNOT00000079002.1	2223	2024.77	8018.01	106.926	ENSRNOG00000058663.1	Suz12	SUZ12 polycomb repressive complex 2 subunit [Source:RGD Symbol;Acc:1593621]
ENSRNOT00000020322.5	2079	1880.77	7447	106.915	ENSRNOG00000015020.7	Idh1	isocitrate dehydrogenase (NADP(+)) 1 [Source:RGD Symbol;Acc:2862]
ENSRNOT00000008008.3	2175	1976.77	7826	106.899	ENSRNOG00000021403.2	Rhob	ras homolog family member B [Source:RGD Symbol;Acc:621309]
ENSRNOT00000020365.5	2261	2062.77	8165.82	106.891	ENSRNOG00000015144.5	Ist1	IST1 factor associated with ESCRT-III [Source:RGD Symbol;Acc:1307799]
ENSRNOT00000065349.3	2290	2091.77	8278	106.857	ENSRNOG00000000479.7	Kifc1	kinesin family member C1 [Source:RGD Symbol;Acc:1359118]
ENSRNOT00000048998.3	1592	1393.77	5509.82	106.743	ENSRNOG00000019425.5	Gabarapl2	GABA type A receptor associated protein like 2 [Source:RGD Symbol;Acc:620510]
ENSRNOT00000079916.1	411	218.217	862.368	106.708	ENSRNOG00000059586.1	AABR07015080.2
ENSRNOT00000088111.1	411	218.217	862.368	106.708	ENSRNOG00000056747.1	AABR07015055.1
ENSRNOT00000082885.1	411	218.217	862.368	106.708	ENSRNOG00000060896.1	AABR07063424.1
ENSRNOT00000085875.1	411	218.217	862.368	106.708	ENSRNOG00000055956.1	AABR07015078.1
ENSRNOT00000072398.1	411	218.217	862.368	106.708	ENSRNOG00000046600.1	AABR07015066.1
ENSRNOT00000020446.4	750	551.785	2180	106.679	ENSRNOG00000015205.6	Cyb5a	cytochrome b5 type A [Source:RGD Symbol;Acc:620558]
ENSRNOT00000075850.2	1380	1181.77	4666.07	106.613	ENSRNOG00000011540.8	Vta1	vesicle trafficking 1 [Source:RGD Symbol;Acc:1305031]
ENSRNOT00000024753.6	3450	3251.77	12812.4	106.391	ENSRNOG00000018345.6	Abce1	ATP binding cassette subfamily E member 1 [Source:RGD Symbol;Acc:1305301]
ENSRNOT00000016758.8	1040	841.767	3311.8	106.234	ENSRNOG00000011932.8	Snrpa1	small nuclear ribonucleoprotein polypeptide A' [Source:RGD Symbol;Acc:2320494]
ENSRNOT00000016184.7	1504	1305.77	5137.09	106.229	ENSRNOG00000012138.7	Rbmxl1	RBMX like 1 [Source:RGD Symbol;Acc:1306751]
ENSRNOT00000050721.3	3031	2832.77	11141	106.195	ENSRNOG00000020651.7	Cars	cysteinyl-tRNA synthetase [Source:RGD Symbol;Acc:1310747]
ENSRNOT00000081980.1	2850	2651.77	10416.5	106.066	ENSRNOG00000053450.1	Myadm	myeloid-associated differentiation marker [Source:RGD Symbol;Acc:727835]
ENSRNOT00000079483.1	1812	1613.77	6332.29	105.953	ENSRNOG00000018468.7	Ldb1	LIM domain binding 1 [Source:RGD Symbol;Acc:1310359]
ENSRNOT00000016984.5	306	127.175	499	105.947	ENSRNOG00000012659.5	Vamp5	vesicle-associated membrane protein 5 [Source:RGD Symbol;Acc:620419]
ENSRNOT00000005127.6	2159	1960.77	7692	105.926	ENSRNOG00000003743.7	Dars	aspartyl-tRNA synthetase [Source:RGD Symbol;Acc:621167]
ENSRNOT00000026040.5	1684	1485.77	5828	105.916	ENSRNOG00000019047.6	Ola1	Obg-like ATPase 1 [Source:RGD Symbol;Acc:1307982]
ENSRNOT00000073247.2	873	674.767	2645	105.843	ENSRNOG00000048812.2	Gpx1	glutathione peroxidase 1 [Source:RGD Symbol;Acc:2729]
ENSRNOT00000009749.5	1860	1661.77	6512.17	105.815	ENSRNOG00000007060.5	Plin2	perilipin 2 [Source:RGD Symbol;Acc:728889]
ENSRNOT00000006887.4	858	659.767	2583	105.712	ENSRNOG00000005184.4	Nop10	NOP10 ribonucleoprotein [Source:RGD Symbol;Acc:1582780]
ENSRNOT00000051554.4	1721	1522.77	5956	105.612	ENSRNOG00000030055.4	Vamp3	vesicle-associated membrane protein 3 [Source:RGD Symbol;Acc:61880]
ENSRNOT00000025086.6	2690	2491.77	9731	105.449	ENSRNOG00000018564.6	Nup93	nucleoporin 93 [Source:RGD Symbol;Acc:1311525]
ENSRNOT00000077185.1	2310	2111.77	8245.33	105.427	ENSRNOG00000033663.5	P4ha2	prolyl 4-hydroxylase subunit alpha 2 [Source:RGD Symbol;Acc:1309673]
ENSRNOT00000058852.4	1935	1736.77	6781	105.425	ENSRNOG00000018698.7	Wac	WW domain containing adaptor with coiled-coil [Source:RGD Symbol;Acc:1562407]
ENSRNOT00000087075.1	1592	1393.77	5439.78	105.386	ENSRNOG00000007738.7	Hm13	histocompatibility minor 13 [Source:RGD Symbol;Acc:1308946]
ENSRNOT00000079785.1	695	496.821	1938.85	105.375	ENSRNOG00000008676.6	Emp1	epithelial membrane protein 1 [Source:RGD Symbol;Acc:2552]
ENSRNOT00000025213.5	759	560.785	2187	105.304	ENSRNOG00000018647.5	Mrpl20	mitochondrial ribosomal protein L20 [Source:RGD Symbol;Acc:1588219]
ENSRNOT00000084294.1	312	131.903	513.733	105.165	ENSRNOG00000061213.1	Mrps36	mitochondrial ribosomal protein S36 [Source:RGD Symbol;Acc:1309315]
ENSRNOT00000068020.2	2117	1918.77	7470	105.121	ENSRNOG00000008064.7	Naga	alpha-N-acetylgalactosaminidase [Source:RGD Symbol;Acc:1306025]
ENSRNOT00000013738.6	1449	1250.77	4863.62	104.996	ENSRNOG00000010204.6	Tmem9	transmembrane protein 9 [Source:RGD Symbol;Acc:1307922]
ENSRNOT00000073082.1	1891	1692.77	6573	104.847	ENSRNOG00000049219.1	Rnf187	ring finger protein 187 [Source:RGD Symbol;Acc:1308636]
ENSRNOT00000000201.5	1217	1018.77	3955	104.825	ENSRNOG00000000185.5	Mpst	mercaptopyruvate sulfurtransferase [Source:RGD Symbol;Acc:620065]
ENSRNOT00000009183.5	2878	2679.77	10402	104.812	ENSRNOG00000006388.5	Pygl	glycogen phosphorylase L [Source:RGD Symbol;Acc:620687]
ENSRNOT00000027525.6	2356	2157.77	8366	104.69	ENSRNOG00000020281.6	Kif22	kinesin family member 22 [Source:RGD Symbol;Acc:1311886]
ENSRNOT00000067483.3	1100	901.767	3496.03	104.682	ENSRNOG00000005614.7	Txn2	thioredoxin 2 [Source:RGD Symbol;Acc:71040]
ENSRNOT00000019399.7	649	450.852	1747	104.629	ENSRNOG00000014092.7	Paip2b	poly(A) binding protein interacting protein 2B [Source:RGD Symbol;Acc:1307930]
ENSRNOT00000004942.5	3435	3236.77	12541	104.619	ENSRNOG00000003691.5	Tmed7	transmembrane p24 trafficking protein 7 [Source:RGD Symbol;Acc:727954]
ENSRNOT00000087534.1	976	777.767	3008.34	104.441	ENSRNOG00000018176.7	Rab6a	RAB6A, member RAS oncogene family [Source:RGD Symbol;Acc:619737]
ENSRNOT00000067943.4	531	333.463	1289.69	104.431	ENSRNOG00000008489.8	Ppih	peptidylprolyl isomerase H [Source:RGD Symbol;Acc:1564921]
ENSRNOT00000047550.4	955	756.767	2925	104.365	ENSRNOG00000030644.4	Mt-nd1	mitochondrially encoded NADH dehydrogenase 1 [Source:RGD Symbol;Acc:620555]
ENSRNOT00000045315.4	5007	4808.77	18568	104.261	ENSRNOG00000001229.6	Col18a1	collagen type XVIII alpha 1 chain [Source:RGD Symbol;Acc:70936]
ENSRNOT00000020693.3	1097	898.767	3469	104.219	ENSRNOG00000014785.3	Ykt6	YKT6 v-SNARE homolog [Source:RGD Symbol;Acc:70897]
ENSRNOT00000016130.3	2949	2750.77	10615.6	104.203	ENSRNOG00000011498.6	Psip1	PC4 and SFRS1 interacting protein 1 [Source:RGD Symbol;Acc:631439]
ENSRNOT00000019647.2	1080	881.767	3402	104.177	ENSRNOG00000014654.2	LOC691807	RIKEN cDNA 1810037I17 gene [Source:MGI Symbol;Acc:MGI:1914954]
ENSRNOT00000092083.1	812	613.767	2368	104.176	ENSRNOG00000016560.6	Card19	caspase recruitment domain family, member 19 [Source:RGD Symbol;Acc:1306058]
ENSRNOT00000034930.5	252	87.073	335.877	104.157	ENSRNOG00000022681.5	RGD1561113	similar to Hypothetical UPF0184 protein C9orf16 homolog [Source:RGD Symbol;Acc:1561113]
ENSRNOT00000000742.5	2178	1979.77	7634	104.119	ENSRNOG00000000604.5	Hdac2	histone deacetylase 2 [Source:RGD Symbol;Acc:619976]
ENSRNOT00000092676.1	693	494.821	1907.81	104.106	ENSRNOG00000000473.6	Pfdn6	prefoldin subunit 6 [Source:RGD Symbol;Acc:1303006]
ENSRNOT00000001160.6	3994	3795.77	14629.3	104.068	ENSRNOG00000000867.6	Vars1	valyl-tRNA synthetase 1 [Source:RGD Symbol;Acc:3950]
ENSRNOT00000023628.3	4520	4321.77	16648	104.014	ENSRNOG00000016596.3	Hspa4	heat shock protein family A (Hsp70) member 4 [Source:RGD Symbol;Acc:628878]
ENSRNOT00000090033.1	1758	1559.77	6006.55	103.982	ENSRNOG00000018524.6	Ezr	ezrin [Source:RGD Symbol;Acc:621161]
ENSRNOT00000086377.1	4465	4266.77	16421.7	103.923	ENSRNOG00000010233.5	Cald1	caldesmon 1 [Source:RGD Symbol;Acc:2256]
ENSRNOT00000079414.1	1623	1424.77	5482.84	103.909	ENSRNOG00000008283.7	B4galt5	beta-1,4-galactosyltransferase 5 [Source:RGD Symbol;Acc:1310062]
ENSRNOT00000091670.1	4061	3862.77	14840.4	103.738	ENSRNOG00000002864.5	Nacc1	nucleus accumbens associated 1 [Source:RGD Symbol;Acc:621003]
ENSRNOT00000001716.7	793	594.767	2285	103.736	ENSRNOG00000001273.7	Psmg3	proteasome assembly chaperone 3 [Source:RGD Symbol;Acc:2319950]
ENSRNOT00000016554.2	684	485.821	1866	103.711	ENSRNOG00000012390.2	Npw	neuropeptide W [Source:RGD Symbol;Acc:727858]
ENSRNOT00000025649.5	3317	3118.77	11961.6	103.561	ENSRNOG00000018901.5	Rab14	RAB14, member RAS oncogene family [Source:RGD Symbol;Acc:620881]
ENSRNOT00000082159.1	1116	917.767	3519.58	103.55	ENSRNOG00000056398.1	AABR07036855.1
ENSRNOT00000072378.2	2773	2574.77	9865.17	103.457	ENSRNOG00000046533.2	AABR07043421.1	cold shock domain-containing protein E1-like [Source:NCBI gene;Acc:100364335]
ENSRNOT00000014941.6	2394	2195.77	8406	103.37	ENSRNOG00000010984.6	Anxa11	annexin A11 [Source:RGD Symbol;Acc:1309911]
ENSRNOT00000011408.7	1893	1694.77	6483.45	103.297	ENSRNOG00000007920.7	Ssbp3	single stranded DNA binding protein 3 [Source:RGD Symbol;Acc:621502]
ENSRNOT00000068033.1	3065	2866.77	10948	103.118	ENSRNOG00000046955.1	Cbx6	chromobox 6 [Source:RGD Symbol;Acc:1307314]
ENSRNOT00000026932.5	1100	901.767	3440	103.004	ENSRNOG00000019811.5	LOC100362432	mitochondrial import inner membrane translocase subunit Tim23-like [Source:RGD Symbol;Acc:2318156]
ENSRNOT00000026648.3	805	606.767	2314	102.975	ENSRNOG00000019682.3	Timm13	translocase of inner mitochondrial membrane 13 [Source:RGD Symbol;Acc:628845]
ENSRNOT00000030031.4	2088	1889.77	7201	102.891	ENSRNOG00000022014.4	Rab35	RAB35, member RAS oncogene family [Source:RGD Symbol;Acc:1306362]
ENSRNOT00000018782.5	5081	4882.77	18579	102.742	ENSRNOG00000013948.5	Zc3hav1	zinc finger CCCH-type containing, antiviral 1 [Source:RGD Symbol;Acc:628694]
ENSRNOT00000047674.4	6245	6046.77	23002	102.715	ENSRNOG00000033090.4	Ltbp1	latent transforming growth factor beta binding protein 1 [Source:RGD Symbol;Acc:68379]
ENSRNOT00000013831.6	2950	2751.77	10467	102.707	ENSRNOG00000010153.6	Raf1	Raf-1 proto-oncogene, serine/threonine kinase [Source:RGD Symbol;Acc:3531]
ENSRNOT00000044613.4	4686	4487.77	17059	102.639	ENSRNOG00000010944.6	Hyou1	hypoxia up-regulated 1 [Source:RGD Symbol;Acc:621146]
ENSRNOT00000064542.1	4291	4092.77	15555	102.623	ENSRNOG00000011157.6	Jak1	Janus kinase 1 [Source:RGD Symbol;Acc:69056]
ENSRNOT00000027537.6	1174	975.767	3702	102.443	ENSRNOG00000020308.6	Ech1	enoyl-CoA hydratase 1 [Source:RGD Symbol;Acc:69353]
ENSRNOT00000088549.1	3159	2960.77	11232	102.434	ENSRNOG00000004912.7	Itgav	integrin subunit alpha V [Source:RGD Symbol;Acc:1310613]
ENSRNOT00000049536.4	3433	3234.77	12258.9	102.329	ENSRNOG00000031081.4	Stat2	signal transducer and activator of transcription 2 [Source:RGD Symbol;Acc:1311649]
ENSRNOT00000028752.5	1687	1488.77	5635	102.202	ENSRNOG00000021175.5	Otub1	OTU deubiquitinase, ubiquitin aldehyde binding 1 [Source:RGD Symbol;Acc:1311329]
ENSRNOT00000085397.1	534	336.407	1273	102.177	ENSRNOG00000057147.1	Praf2	PRA1 domain family, member 2 [Source:RGD Symbol;Acc:1566287]
ENSRNOT00000007637.2	1938	1739.77	6577.71	102.088	ENSRNOG00000005811.2	LOC688655	similar to heat shock protein 8 [Source:RGD Symbol;Acc:1586445]
ENSRNOT00000039291.5	1927	1728.77	6532	102.024	ENSRNOG00000028105.5	Hars1	histidyl-tRNA synthetase 1 [Source:RGD Symbol;Acc:1310695]
ENSRNOT00000012996.6	2427	2228.77	8416	101.961	ENSRNOG00000009625.6	Dpysl2	dihydropyrimidinase-like 2 [Source:RGD Symbol;Acc:2517]
ENSRNOT00000086865.1	240	78.9438	298	101.927	ENSRNOG00000052701.1	Coa6	cytochrome c oxidase assembly factor 6 [Source:RGD Symbol;Acc:7559315]
ENSRNOT00000028680.5	4201	4002.77	15109	101.922	ENSRNOG00000021118.5	Nomo1	nodal modulator 1 [Source:RGD Symbol;Acc:1305240]
ENSRNOT00000024772.6	2956	2757.77	10384.4	101.675	ENSRNOG00000018164.6	Spcs2	signal peptidase complex subunit 2 [Source:RGD Symbol;Acc:1311253]
ENSRNOT00000073910.1	1791	1592.77	5997	101.665	ENSRNOG00000050997.1	Ifrd1	interferon-related developmental regulator 1 [Source:RGD Symbol;Acc:2867]
ENSRNOT00000067375.3	3417	3218.77	12113	101.614	ENSRNOG00000038933.4	Spcs3	signal peptidase complex subunit 3 [Source:RGD Symbol;Acc:1588184]
ENSRNOT00000022862.6	2068	1869.77	7034	101.579	ENSRNOG00000016849.6	Ppp2r5d	protein phosphatase 2, regulatory subunit B', delta [Source:RGD Symbol;Acc:1306666]
ENSRNOT00000039876.5	3315	3116.77	11717.2	101.51	ENSRNOG00000001959.7	Mx1	myxovirus (influenza virus) resistance 1 [Source:RGD Symbol;Acc:3127]
ENSRNOT00000060168.2	3071	2872.77	10798	101.493	ENSRNOG00000027520.5	Pls3	plastin 3 [Source:RGD Symbol;Acc:621409]
ENSRNOT00000063779.2	453	257.559	968	101.482	ENSRNOG00000043193.2	Smim1	small integral membrane protein 1 (Vel blood group) [Source:RGD Symbol;Acc:1564257]
ENSRNOT00000052270.6	1589	1390.77	5225.97	101.462	ENSRNOG00000030712.6	RT1-A2	RT1 class Ia, locus A2 [Source:RGD Symbol;Acc:1595923]
ENSRNOT00000020220.5	3059	2860.77	10740.1	101.372	ENSRNOG00000014886.5	Fam107b	family with sequence similarity 107, member B [Source:RGD Symbol;Acc:1561482]
ENSRNOT00000044081.5	2431	2232.77	8377.25	101.309	ENSRNOG00000006997.8	App	amyloid beta precursor protein [Source:RGD Symbol;Acc:2139]
ENSRNOT00000007181.5	2150	1951.77	7319	101.255	ENSRNOG00000005397.5	Maea	macrophage erythroblast attacher [Source:RGD Symbol;Acc:1309877]
ENSRNOT00000016520.6	1679	1480.77	5550	101.204	ENSRNOG00000011952.6	Samm50	SAMM50 sorting and assembly machinery component [Source:RGD Symbol;Acc:1303219]
ENSRNOT00000043559.4	931	732.767	2745.02	101.151	ENSRNOG00000003049.7	Hsd17b10	hydroxysteroid (17-beta) dehydrogenase 10 [Source:RGD Symbol;Acc:69231]
ENSRNOT00000019560.7	4489	4290.77	16061.7	101.076	ENSRNOG00000014173.7	Smc3	structural maintenance of chromosomes 3 [Source:RGD Symbol;Acc:62006]
ENSRNOT00000074217.1	1911	1712.77	6409	101.038	ENSRNOG00000050258.1	Ccnd3	cyclin D3 [Source:RGD Symbol;Acc:2293]
ENSRNOT00000050535.5	855	656.767	2456.96	101.013	ENSRNOG00000034233.6	Fyttd1	forty-two-three domain containing 1 [Source:RGD Symbol;Acc:1306899]
ENSRNOT00000070920.2	2017	1818.77	6798.56	100.932	ENSRNOG00000045605.2	Uxs1	UDP-glucuronate decarboxylase 1 [Source:RGD Symbol;Acc:628680]
ENSRNOT00000084443.1	297	120.157	449	100.899	ENSRNOG00000056474.1	AC096239.2
ENSRNOT00000007624.4	2229	2030.77	7582	100.813	ENSRNOG00000005587.4	Suclg1	succinate-CoA ligase, alpha subunit [Source:RGD Symbol;Acc:619821]
ENSRNOT00000026224.2	974	775.767	2895.11	100.769	ENSRNOG00000019302.3	Stx4	syntaxin 4 [Source:RGD Symbol;Acc:621019]
ENSRNOT00000077889.1	684	485.821	1812.76	100.752	ENSRNOG00000060349.1	Fam3c	family with sequence similarity 3, member C [Source:RGD Symbol;Acc:735193]
ENSRNOT00000048293.4	1517	1318.77	4920	100.737	ENSRNOG00000031431.5	Cdca8	cell division cycle associated 8 [Source:RGD Symbol;Acc:1566306]
ENSRNOT00000026646.5	1035	836.767	3120.89	100.708	ENSRNOG00000019634.9	Eif4e2	eukaryotic translation initiation factor 4E family member 2 [Source:RGD Symbol;Acc:1307790]
ENSRNOT00000091205.1	2257	2058.77	7675.44	100.667	ENSRNOG00000019244.6	Mxra8	matrix remodeling associated 8 [Source:RGD Symbol;Acc:1359356]
ENSRNOT00000002649.5	1172	973.767	3630	100.657	ENSRNOG00000001930.7	Ccdc50	coiled-coil domain containing 50 [Source:RGD Symbol;Acc:727841]
ENSRNOT00000001829.6	2093	1894.77	7056	100.553	ENSRNOG00000001355.6	Taf6	TATA-box binding protein associated factor 6 [Source:RGD Symbol;Acc:1311608]
ENSRNOT00000019405.7	1264	1065.77	3967.86	100.528	ENSRNOG00000014317.7	Arpc5l	actin related protein 2/3 complex, subunit 5-like [Source:RGD Symbol;Acc:1308867]
ENSRNOT00000007595.7	1639	1440.77	5363.32	100.515	ENSRNOG00000004973.7	Ppp2r5c	protein phosphatase 2, regulatory subunit B', gamma [Source:RGD Symbol;Acc:1585097]
ENSRNOT00000009989.3	2231	2032.77	7567	100.514	ENSRNOG00000006870.6	Mtdh	metadherin [Source:RGD Symbol;Acc:620992]
ENSRNOT00000041892.2	747	548.785	2042.03	100.473	ENSRNOG00000031706.2	RGD1563601	similar to Tpi1 protein [Source:RGD Symbol;Acc:1563601]
ENSRNOT00000016060.5	711	512.821	1908	100.462	ENSRNOG00000011825.5	Ndufb3	NADH:ubiquinone oxidoreductase subunit B3 [Source:RGD Symbol;Acc:1310737]
ENSRNOT00000010602.7	1423	1224.77	4555	100.421	ENSRNOG00000007842.7	Aup1	AUP1, lipid droplet regulating VLDL assembly factor [Source:RGD Symbol;Acc:1591777]
ENSRNOT00000087961.1	1161	962.767	3580.51	100.419	ENSRNOG00000020615.7	Nap1l4	nucleosome assembly protein 1-like 4 [Source:RGD Symbol;Acc:1305391]
ENSRNOT00000022400.5	8647	8448.77	31418	100.41	ENSRNOG00000016630.6	Tln1	talin 1 [Source:RGD Symbol;Acc:1306247]
ENSRNOT00000049973.5	3423	3224.77	11987	100.37	ENSRNOG00000031824.5	Slc44a2	solute carrier family 44 member 2 [Source:RGD Symbol;Acc:1309680]
ENSRNOT00000071173.2	6118	5919.77	21999	100.344	ENSRNOG00000024250.7	Wwc3	WWC family member 3 [Source:RGD Symbol;Acc:1560666]
ENSRNOT00000000306.5	1715	1516.77	5630	100.226	ENSRNOG00000038001.3	Slc25a1	solute carrier family 25 member 1 [Source:RGD Symbol;Acc:3703]
ENSRNOT00000012287.6	2067	1868.77	6933.6	100.183	ENSRNOG00000008744.6	Cops2	COP9 signalosome subunit 2 [Source:RGD Symbol;Acc:628791]
ENSRNOT00000055500.2	2856	2657.77	9860	100.173	ENSRNOG00000006868.4	Ube2z	ubiquitin-conjugating enzyme E2Z [Source:RGD Symbol;Acc:1308347]
ENSRNOT00000035312.5	2712	2513.77	9323	100.143	ENSRNOG00000023455.5	Pomgnt1	protein O-linked mannose N-acetylglucosaminyltransferase 1 (beta 1,2-) [Source:RGD Symbol;Acc:1359396]
ENSRNOT00000007300.5	1934	1735.77	6429	100.01	ENSRNOG00000005249.5	Snx6	sorting nexin 6 [Source:RGD Symbol;Acc:1304647]
ENSRNOT00000000025.7	1062	863.767	3199	100.002	ENSRNOG00000000024.7	Hebp1	heme binding protein 1 [Source:RGD Symbol;Acc:1304581]
ENSRNOT00000007424.4	1416	1217.77	4510	100.001	ENSRNOG00000005577.6	Desi1	desumoylating isopeptidase 1 [Source:RGD Symbol;Acc:1305776]
ENSRNOT00000075480.2	2485	2286.77	8468	99.9885	ENSRNOG00000049560.2	Glul	glutamate-ammonia ligase [Source:RGD Symbol;Acc:2710]
ENSRNOT00000089007.1	797	598.767	2215	99.8866	ENSRNOG00000058677.1	Lsm8	LSM8 homolog, U6 small nuclear RNA associated [Source:RGD Symbol;Acc:1308442]
ENSRNOT00000076412.2	690	491.821	1819.34	99.8847	ENSRNOG00000007091.8	Ly6e	lymphocyte antigen 6 family member E [Source:RGD Symbol;Acc:1565342]
ENSRNOT00000082508.1	1959	1760.77	6510	99.8321	ENSRNOG00000057102.1	Pafah1b2	platelet-activating factor acetylhydrolase 1b, catalytic subunit 2 [Source:RGD Symbol;Acc:620332]
ENSRNOT00000077362.1	1594	1395.77	5156.63	99.7572	ENSRNOG00000014154.7	Ilf2	interleukin enhancer binding factor 2 [Source:RGD Symbol;Acc:1305734]
ENSRNOT00000091287.1	8121	7922.77	29260.4	99.7229	ENSRNOG00000058561.1	Srrm2	serine/arginine repetitive matrix 2 [Source:RGD Symbol;Acc:1310163]
ENSRNOT00000076164.2	3319	3120.77	11515.9	99.639	ENSRNOG00000051170.2	Ddx17	DEAD-box helicase 17 [Source:RGD Symbol;Acc:1304945]
ENSRNOT00000001581.6	1649	1450.77	5350	99.5743	ENSRNOG00000001192.6	Gltp	glycolipid transfer protein [Source:RGD Symbol;Acc:1564442]
ENSRNOT00000092112.1	760	561.785	2071.37	99.5585	ENSRNOG00000016733.4	Rab13	RAB13, member RAS oncogene family [Source:RGD Symbol;Acc:620880]
ENSRNOT00000092945.1	3562	3363.77	12401.9	99.5526	ENSRNOG00000018322.8	Picalm	phosphatidylinositol binding clathrin assembly protein [Source:RGD Symbol;Acc:621054]
ENSRNOT00000007374.6	1670	1471.77	5425	99.5295	ENSRNOG00000005492.6	Hpcal1	hippocalcin-like 1 [Source:RGD Symbol;Acc:708375]
ENSRNOT00000024161.5	1351	1152.77	4246.97	99.4785	ENSRNOG00000017962.5	Serpinb6a	serpin family B member 6A [Source:RGD Symbol;Acc:735108]
ENSRNOT00000021837.8	5650	5451.77	20075	99.4281	ENSRNOG00000016067.8	Ckap5	cytoskeleton associated protein 5 [Source:RGD Symbol;Acc:1563596]
ENSRNOT00000090378.1	1785	1586.77	5841.44	99.4026	ENSRNOG00000011621.7	Hnrnpc	heterogeneous nuclear ribonucleoprotein C [Source:RGD Symbol;Acc:1309982]
ENSRNOT00000020671.7	1483	1284.77	4726.81	99.3424	ENSRNOG00000015097.7	Kcmf1	potassium channel modulatory factor 1 [Source:RGD Symbol;Acc:1591490]
ENSRNOT00000067780.3	1783	1584.77	5830	99.3332	ENSRNOG00000042838.3	Junb	JunB proto-oncogene, AP-1 transcription factor subunit [Source:RGD Symbol;Acc:2944]
ENSRNOT00000046563.2	1634	1435.77	5281	99.3169	ENSRNOG00000000231.6	Kctd17	potassium channel tetramerization domain containing 17 [Source:RGD Symbol;Acc:1311154]
ENSRNOT00000000535.5	3624	3425.77	12590.8	99.24	ENSRNOG00000000461.7	LOC108348112	bromodomain-containing protein 2 [Source:RGD Symbol;Acc:11509343]
ENSRNOT00000003046.6	1639	1440.77	5295	99.2347	ENSRNOG00000023650.5	Cops4	COP9 signalosome subunit 4 [Source:RGD Symbol;Acc:1302952]
ENSRNOT00000061686.3	1859	1660.77	6101	99.1936	ENSRNOG00000007136.6	Anxa7	annexin A7 [Source:RGD Symbol;Acc:621173]
ENSRNOT00000013088.5	5027	4828.77	17733	99.1601	ENSRNOG00000009636.5	Scrn1	secernin 1 [Source:RGD Symbol;Acc:1560999]
ENSRNOT00000033408.5	2027	1828.77	6714.65	99.1416	ENSRNOG00000019189.7	Acat2	acetyl-CoA acetyltransferase 2 [Source:RGD Symbol;Acc:1359366]
ENSRNOT00000001595.5	3639	3440.77	12623	99.06	ENSRNOG00000001204.5	Ankrd13a	ankyrin repeat domain 13a [Source:RGD Symbol;Acc:1308577]
ENSRNOT00000072429.2	2682	2483.77	9110	99.0373	ENSRNOG00000046891.2	Hk1	hexokinase 1 [Source:RGD Symbol;Acc:2796]
ENSRNOT00000050631.4	2034	1835.77	6728	98.96	ENSRNOG00000017832.6	Snx2	sorting nexin 2 [Source:RGD Symbol;Acc:1310291]
ENSRNOT00000055289.2	1161	962.767	3528.32	98.955	ENSRNOG00000036841.3	Cbx5	chromobox 5 [Source:RGD Symbol;Acc:1306619]
ENSRNOT00000089309.1	2673	2474.77	9065	98.9064	ENSRNOG00000058805.1	Aida	axin interactor, dorsalization associated [Source:RGD Symbol;Acc:1592746]
ENSRNOT00000022241.5	1654	1455.77	5331.31	98.8856	ENSRNOG00000016416.7	Rnh1	ribonuclease/angiogenin inhibitor 1 [Source:RGD Symbol;Acc:621398]
ENSRNOT00000012240.4	1818	1619.77	5931	98.8705	ENSRNOG00000009057.4	Sec62	SEC62 homolog, preprotein translocation factor [Source:RGD Symbol;Acc:1308862]
ENSRNOT00000044608.5	1938	1739.77	6369.46	98.856	ENSRNOG00000034066.5	Hspa8	heat shock protein family A (Hsp70) member 8 [Source:RGD Symbol;Acc:621725]
ENSRNOT00000080511.1	2431	2232.77	8172	98.8271	ENSRNOG00000056216.1	Casp7	caspase 7 [Source:RGD Symbol;Acc:620944]
ENSRNOT00000007484.5	2763	2564.77	9382	98.7731	ENSRNOG00000005551.6	Derl1	derlin 1 [Source:RGD Symbol;Acc:1311835]
ENSRNOT00000002044.6	1537	1338.77	4894	98.7075	ENSRNOG00000001494.6	Napa	NSF attachment protein alpha [Source:RGD Symbol;Acc:620855]
ENSRNOT00000045964.4	3726	3527.77	12893.9	98.6908	ENSRNOG00000007801.7	R3hdm2	R3H domain containing 2 [Source:RGD Symbol;Acc:1310066]
ENSRNOT00000022960.6	2028	1829.77	6687.24	98.683	ENSRNOG00000017029.6	Snx1	sorting nexin 1 [Source:RGD Symbol;Acc:68935]
ENSRNOT00000087298.1	2118	1919.77	7013.14	98.6404	ENSRNOG00000061088.1	Atf1	activating transcription factor 1 [Source:RGD Symbol;Acc:1307360]
ENSRNOT00000052202.4	1662	1463.77	5346.56	98.6266	ENSRNOG00000000665.7	Pitpnb	phosphatidylinositol transfer protein, beta [Source:RGD Symbol;Acc:620143]
ENSRNOT00000025618.5	986	787.767	2875	98.5443	ENSRNOG00000018916.5	Bcl7c	BAF chromatin remodeling complex subunit BCL7C [Source:RGD Symbol;Acc:1308439]
ENSRNOT00000045326.3	3512	3313.77	12093	98.5379	ENSRNOG00000034015.3	Capn2	calpain 2 [Source:RGD Symbol;Acc:2268]
ENSRNOT00000013914.4	3598	3399.77	12402	98.4994	ENSRNOG00000009689.4	Api5	apoptosis inhibitor 5 [Source:RGD Symbol;Acc:1309772]
ENSRNOT00000011915.7	2933	2734.77	9966.91	98.4082	ENSRNOG00000008725.7	Slc37a3	solute carrier family 37, member 3 [Source:RGD Symbol;Acc:1310346]
ENSRNOT00000017174.5	1579	1380.77	5032	98.4037	ENSRNOG00000012772.5	Nqo1	NAD(P)H quinone dehydrogenase 1 [Source:RGD Symbol;Acc:2503]
ENSRNOT00000055957.3	1772	1573.77	5728.31	98.2828	ENSRNOG00000037113.3	Slfn2	schlafen 2 [Source:RGD Symbol;Acc:1308645]
ENSRNOT00000019555.6	585	387.073	1408.58	98.2607	ENSRNOG00000013930.7	Rnf4	ring finger protein 4 [Source:RGD Symbol;Acc:3583]
ENSRNOT00000031045.5	4102	3903.77	14204	98.2467	ENSRNOG00000023095.5	Npepps	aminopeptidase puromycin sensitive [Source:RGD Symbol;Acc:619962]
ENSRNOT00000085026.1	1720	1521.77	5534	98.1934	ENSRNOG00000057078.1	Ddit4	DNA-damage-inducible transcript 4 [Source:RGD Symbol;Acc:621731]
ENSRNOT00000048923.4	1157	958.767	3485.24	98.1547	ENSRNOG00000029549.4	Eci3	enoyl-Coenzyme A delta isomerase 3 [Source:RGD Symbol;Acc:1310224]
ENSRNOT00000065729.3	1977	1778.77	6453.68	97.9669	ENSRNOG00000049814.2	LOC100910882	RNA-binding protein 39-like [Source:RGD Symbol;Acc:6496028]
ENSRNOT00000055102.4	2358	2159.77	7832	97.9167	ENSRNOG00000004479.7	Aurka	aurora kinase A [Source:RGD Symbol;Acc:628895]
ENSRNOT00000085226.1	1147	948.767	3438	97.8447	ENSRNOG00000059017.1	AC106292.2
ENSRNOT00000077784.1	3270	3071.77	11129.1	97.8277	ENSRNOG00000057626.1	Kif1b	kinesin family member 1B [Source:RGD Symbol;Acc:621520]
ENSRNOT00000024306.5	3065	2866.77	10385.7	97.8213	ENSRNOG00000017730.6	Psmd1	proteasome 26S subunit, non-ATPase 1 [Source:RGD Symbol;Acc:621669]
ENSRNOT00000090712.1	1863	1664.77	6031	97.8199	ENSRNOG00000052574.1	AABR07021955.1
ENSRNOT00000025550.6	1508	1309.77	4742	97.7594	ENSRNOG00000018767.6	Rbm17	RNA binding motif protein 17 [Source:RGD Symbol;Acc:1311208]
ENSRNOT00000005258.4	1483	1284.77	4636	97.4339	ENSRNOG00000003923.4	Rab21	RAB21, member RAS oncogene family [Source:RGD Symbol;Acc:1303150]
ENSRNOT00000016876.7	834	635.767	2293.37	97.402	ENSRNOG00000011732.7	Psmb7	proteasome 20S subunit beta 7 [Source:RGD Symbol;Acc:621093]
ENSRNOT00000011481.6	2121	1922.77	6927	97.2769	ENSRNOG00000008196.6	Parp12	poly (ADP-ribose) polymerase family, member 12 [Source:RGD Symbol;Acc:1308628]
ENSRNOT00000081265.1	835	636.767	2293.52	97.2555	ENSRNOG00000048725.2	Lsm2	LSM2 homolog, U6 small nuclear RNA and mRNA degradation associated [Source:RGD Symbol;Acc:1598536]
ENSRNOT00000004046.6	2204	2005.77	7208	97.0343	ENSRNOG00000002989.6	Nmt1	N-myristoyltransferase 1 [Source:RGD Symbol;Acc:628642]
ENSRNOT00000008150.5	2884	2685.77	9651.13	97.0288	ENSRNOG00000005355.7	Ncstn	nicastrin [Source:RGD Symbol;Acc:631418]
ENSRNOT00000075966.1	1187	988.767	3547.92	96.8884	ENSRNOG00000048441.3	Wdr82	WD repeat domain 82 [Source:RGD Symbol;Acc:1584269]
ENSRNOT00000028297.5	2254	2055.77	7374	96.8546	ENSRNOG00000020851.6	Aplp1	amyloid beta precursor like protein 1 [Source:RGD Symbol;Acc:69257]
ENSRNOT00000001962.6	1322	1123.77	4029	96.8082	ENSRNOG00000001443.6	Rhbdd2	rhomboid domain containing 2 [Source:RGD Symbol;Acc:1308231]
ENSRNOT00000054862.4	2268	2069.77	7409.49	96.6626	ENSRNOG00000020615.7	Nap1l4	nucleosome assembly protein 1-like 4 [Source:RGD Symbol;Acc:1305391]
ENSRNOT00000021286.5	2171	1972.77	7050	96.4949	ENSRNOG00000015753.6	Epn1	Epsin 1 [Source:RGD Symbol;Acc:619772]
ENSRNOT00000006900.7	1030	831.767	2971	96.4478	ENSRNOG00000004967.7	Snrpb2	small nuclear ribonucleoprotein polypeptide B2 [Source:RGD Symbol;Acc:1310194]
ENSRNOT00000028699.4	2012	1813.77	6478.14	96.4406	ENSRNOG00000021138.6	Cers2	ceramide synthase 2 [Source:RGD Symbol;Acc:1310059]
ENSRNOT00000004947.7	694	495.821	1770	96.3917	ENSRNOG00000003724.7	Mrpl27	mitochondrial ribosomal protein L27 [Source:RGD Symbol;Acc:1309090]
ENSRNOT00000071827.2	2382	2183.77	7785	96.2595	ENSRNOG00000049784.2	Tsnax	translin-associated factor X [Source:RGD Symbol;Acc:621574]
ENSRNOT00000041815.6	3335	3136.77	11181.2	96.249	ENSRNOG00000019253.8	Bcar1	BCAR1 scaffold protein, Cas family member [Source:RGD Symbol;Acc:2406]
ENSRNOT00000033288.6	1513	1314.77	4686	96.2376	ENSRNOG00000027175.6	Cnpy4	canopy FGF signaling regulator 4 [Source:RGD Symbol;Acc:1307636]
ENSRNOT00000029728.5	2227	2028.77	7229.05	96.2144	ENSRNOG00000021781.5	Camk1	calcium/calmodulin-dependent protein kinase I [Source:RGD Symbol;Acc:629473]
ENSRNOT00000087065.1	1441	1242.77	4428.14	96.2106	ENSRNOG00000020643.7	Bub3	BUB3 mitotic checkpoint protein [Source:RGD Symbol;Acc:1306654]
ENSRNOT00000022054.6	1111	912.767	3252.01	96.2019	ENSRNOG00000038905.4	AABR07048397.1
ENSRNOT00000011065.4	989	790.767	2813	96.0533	ENSRNOG00000008372.4	Vamp7	vesicle-associated membrane protein 7 [Source:RGD Symbol;Acc:621558]
ENSRNOT00000014104.7	2635	2436.77	8666.79	96.0362	ENSRNOG00000009681.8	Flot2	flotillin 2 [Source:RGD Symbol;Acc:70993]
ENSRNOT00000010933.6	3538	3339.77	11876.7	96.0217	ENSRNOG00000007890.6	Usp1	ubiquitin specific peptidase 1 [Source:RGD Symbol;Acc:1306461]
ENSRNOT00000016608.2	1628	1429.77	5084	96.0133	ENSRNOG00000012228.2	Skap2	src kinase associated phosphoprotein 2 [Source:RGD Symbol;Acc:620159]
ENSRNOT00000068013.3	6512	6313.77	22443	95.9806	ENSRNOG00000028834.5	Polr2a	RNA polymerase II subunit A [Source:RGD Symbol;Acc:1587326]
ENSRNOT00000015852.5	2474	2275.77	8089	95.975	ENSRNOG00000011849.6	Ndufs1	NADH:ubiquinone oxidoreductase core subunit S1 [Source:RGD Symbol;Acc:1359670]
ENSRNOT00000005125.6	2179	1980.77	7036.45	95.9204	ENSRNOG00000003563.6	Blmh	bleomycin hydrolase [Source:RGD Symbol;Acc:1304668]
ENSRNOT00000009100.6	2502	2303.77	8183	95.9103	ENSRNOG00000006652.6	Ddx1	DEAD-box helicase 1 [Source:RGD Symbol;Acc:619903]
ENSRNOT00000008492.6	1811	1612.77	5726.22	95.871	ENSRNOG00000005659.6	Aurkb	aurora kinase B [Source:RGD Symbol;Acc:621625]
ENSRNOT00000021817.6	2013	1814.77	6438	95.7902	ENSRNOG00000015780.6	Rcn2	reticulocalbin 2 [Source:RGD Symbol;Acc:3548]
ENSRNOT00000017942.6	1162	963.767	3414	95.6495	ENSRNOG00000013343.6	Myg1	melanocyte proliferating gene 1 [Source:RGD Symbol;Acc:1359237]
ENSRNOT00000072069.1	1355	1156.77	4093	95.5404	ENSRNOG00000050697.1	Ctsz	cathepsin Z [Source:RGD Symbol;Acc:708479]
ENSRNOT00000020316.5	1852	1653.77	5851	95.5316	ENSRNOG00000014961.5	Pdpn	podoplanin [Source:RGD Symbol;Acc:61819]
ENSRNOT00000023211.5	2312	2113.77	7478	95.5255	ENSRNOG00000016923.5	Clptm1l	CLPTM1-like [Source:RGD Symbol;Acc:1307896]
ENSRNOT00000070978.2	1317	1118.77	3954	95.4307	ENSRNOG00000048834.2	Plin3	perilipin 3 [Source:RGD Symbol;Acc:1595854]
ENSRNOT00000020385.5	1697	1498.77	5296.71	95.4252	ENSRNOG00000014564.6	Yipf5	Yip1 domain family, member 5 [Source:RGD Symbol;Acc:1359165]
ENSRNOT00000041237.5	1827	1628.77	5754.58	95.3995	ENSRNOG00000031421.5	Eif1a	eukaryotic translation initiation factor 1A [Source:RGD Symbol;Acc:1306331]
ENSRNOT00000077357.1	2282	2083.77	7357.26	95.3362	ENSRNOG00000000465.7	Slc39a7	solute carrier family 39 member 7 [Source:RGD Symbol;Acc:1593280]
ENSRNOT00000025303.3	1984	1785.77	6300.32	95.264	ENSRNOG00000018677.3	Akt2	AKT serine/threonine kinase 2 [Source:RGD Symbol;Acc:2082]
ENSRNOT00000010243.5	1281	1082.77	3819	95.237	ENSRNOG00000033434.5	Casp12	caspase 12 [Source:RGD Symbol;Acc:621758]
ENSRNOT00000093327.1	435	240.553	848	95.1865	ENSRNOG00000010311.9	Dzip1	DAZ interacting zinc finger protein 1 [Source:RGD Symbol;Acc:1307701]
ENSRNOT00000039341.7	7575	7376.77	25999	95.166	ENSRNOG00000021437.7	AABR07073181.1
ENSRNOT00000084123.1	1227	1028.77	3625.37	95.1539	ENSRNOG00000003026.7	Rad23a	RAD23 homolog A, nucleotide excision repair protein [Source:RGD Symbol;Acc:1309899]
ENSRNOT00000023515.6	606	407.968	1437	95.1089	ENSRNOG00000017372.6	Higd2a	HIG1 hypoxia inducible domain family, member 2A [Source:RGD Symbol;Acc:1309691]
ENSRNOT00000003346.4	1868	1669.77	5878	95.0528	ENSRNOG00000002433.5	G3bp2	G3BP stress granule assembly factor 2 [Source:RGD Symbol;Acc:1309571]
ENSRNOT00000087165.1	255	89.2109	314	95.0393	ENSRNOG00000057502.1	AC126148.1
ENSRNOT00000018489.5	2173	1974.77	6950	95.0299	ENSRNOG00000013790.5	Mfsd1	major facilitator superfamily domain containing 1 [Source:RGD Symbol;Acc:1305751]
ENSRNOT00000010252.6	2129	1930.77	6795	95.0278	ENSRNOG00000007739.6	Rars1	arginyl-tRNA synthetase 1 [Source:RGD Symbol;Acc:1309215]
ENSRNOT00000019497.6	2163	1964.77	6912.46	94.9976	ENSRNOG00000014399.6	Aamp	angio-associated, migratory cell protein [Source:RGD Symbol;Acc:1306281]
ENSRNOT00000022201.5	919	720.767	2535	94.9674	ENSRNOG00000016383.5	Commd3	COMM domain containing 3 [Source:RGD Symbol;Acc:735116]
ENSRNOT00000009249.5	1361	1162.77	4084	94.8384	ENSRNOG00000006751.5	Psmd6	proteasome 26S subunit, non-ATPase 6 [Source:RGD Symbol;Acc:735127]
ENSRNOT00000008364.7	1141	942.767	3311	94.8301	ENSRNOG00000005884.7	Emc7	ER membrane protein complex subunit 7 [Source:RGD Symbol;Acc:1305045]
ENSRNOT00000064860.1	4205	4006.77	14065	94.7844	ENSRNOG00000002735.6	Dhx9	DExH-box helicase 9 [Source:RGD Symbol;Acc:1308548]
ENSRNOT00000033706.5	2613	2414.77	8466	94.666	ENSRNOG00000011014.7	Copg2	coatomer protein complex, subunit gamma 2 [Source:RGD Symbol;Acc:1566215]
ENSRNOT00000013271.6	2420	2221.77	7784.03	94.6013	ENSRNOG00000009184.7	Foxp1	forkhead box P1 [Source:RGD Symbol;Acc:1308669]
ENSRNOT00000085707.1	5700	5501.77	19264	94.5443	ENSRNOG00000055925.1	Zc3h7b	zinc finger CCCH-type containing 7B [Source:RGD Symbol;Acc:1307064]
ENSRNOT00000086491.1	4023	3824.77	13389	94.5223	ENSRNOG00000008519.7	Dipk2a	divergent protein kinase domain 2A [Source:RGD Symbol;Acc:1309079]
ENSRNOT00000025203.6	1884	1685.77	5901	94.519	ENSRNOG00000018604.6	Tufm	Tu translation elongation factor, mitochondrial [Source:RGD Symbol;Acc:1305501]
ENSRNOT00000008837.5	1253	1054.77	3688	94.4116	ENSRNOG00000006731.5	Spc25	SPC25 component of NDC80 kinetochore complex [Source:RGD Symbol;Acc:1307811]
ENSRNOT00000015213.6	1122	923.767	3224	94.2375	ENSRNOG00000011384.6	Aimp1	aminoacyl tRNA synthetase complex-interacting multifunctional protein 1 [Source:RGD Symbol;Acc:620466]
ENSRNOT00000009866.5	839	640.767	2236.14	94.2302	ENSRNOG00000007512.5	Srp14	signal recognition particle 14 [Source:RGD Symbol;Acc:1308506]
ENSRNOT00000010210.4	3585	3386.77	11813	94.1816	ENSRNOG00000007665.4	Cse1l	chromosome segregation 1 like [Source:RGD Symbol;Acc:1307536]
ENSRNOT00000042925.5	1581	1382.77	4821	94.1411	ENSRNOG00000001465.7	Ids	iduronate 2-sulfatase [Source:RGD Symbol;Acc:1560491]
ENSRNOT00000027351.7	1758	1559.77	5438	94.1392	ENSRNOG00000020179.7	Nt5c2	5'-nucleotidase, cytosolic II [Source:RGD Symbol;Acc:2323387]
ENSRNOT00000026462.7	996	797.767	2781	94.1274	ENSRNOG00000019494.7	Psmb10	proteasome 20S subunit beta 10 [Source:RGD Symbol;Acc:1307428]
ENSRNOT00000056237.3	3548	3349.77	11667.5	94.0487	ENSRNOG00000021213.6	Lix1l	limb and CNS expressed 1 like [Source:RGD Symbol;Acc:1593161]
ENSRNOT00000038537.5	5617	5418.77	18870.6	94.0323	ENSRNOG00000000567.7	Unc5b	unc-5 netrin receptor B [Source:RGD Symbol;Acc:621756]
ENSRNOT00000011999.5	1423	1224.77	4262	93.9618	ENSRNOG00000009068.5	Phlda3	pleckstrin homology-like domain, family A, member 3 [Source:RGD Symbol;Acc:1310502]
ENSRNOT00000093534.1	797	598.767	2082.86	93.9275	ENSRNOG00000000926.7	Mrps17	mitochondrial ribosomal protein S17 [Source:RGD Symbol;Acc:1307650]
ENSRNOT00000019740.5	595	396.982	1380.68	93.9105	ENSRNOG00000014581.5	Trappc2l	trafficking protein particle complex 2-like [Source:RGD Symbol;Acc:1304906]
ENSRNOT00000002053.4	1145	946.767	3290	93.8305	ENSRNOG00000001501.4	Snrpa	small nuclear ribonucleoprotein polypeptide A [Source:RGD Symbol;Acc:1307416]
ENSRNOT00000013445.5	2143	1944.77	6758	93.83	ENSRNOG00000009552.6	Serinc3	serine incorporator 3 [Source:RGD Symbol;Acc:1308390]
ENSRNOT00000062031.1	243	81.058	281.43	93.7489	ENSRNOG00000040303.1	Cebpzos	CEBPZ opposite strand [Source:RGD Symbol;Acc:9177508]
ENSRNOT00000006407.4	1253	1054.77	3661	93.7205	ENSRNOG00000025792.4	Crk	CRK proto-oncogene, adaptor protein [Source:RGD Symbol;Acc:2405]
ENSRNOT00000086893.1	2805	2606.77	9047.84	93.7204	ENSRNOG00000019799.7	Pcdhgc3	protocadherin gamma subfamily C, 3 [Source:RGD Symbol;Acc:620746]
ENSRNOT00000019561.5	956	757.767	2629.92	93.7126	ENSRNOG00000014208.5	Dctn3	dynactin subunit 3 [Source:RGD Symbol;Acc:1309547]
ENSRNOT00000041493.3	4083	3884.77	13476	93.6671	ENSRNOG00000031364.3	Kif1c	kinesin family member 1C [Source:RGD Symbol;Acc:70928]
ENSRNOT00000031007.6	1963	1764.77	6120	93.6387	ENSRNOG00000027514.6	Ube2m	ubiquitin-conjugating enzyme E2M [Source:RGD Symbol;Acc:1307614]
ENSRNOT00000026909.7	1380	1181.77	4095.88	93.5852	ENSRNOG00000019813.7	Ppp4c	protein phosphatase 4, catalytic subunit [Source:RGD Symbol;Acc:621225]
ENSRNOT00000015217.5	1498	1299.77	4503	93.5465	ENSRNOG00000011383.5	Ndufs4	NADH:ubiquinone oxidoreductase subunit S4 [Source:RGD Symbol;Acc:1594380]
ENSRNOT00000092019.1	3723	3524.77	12204.5	93.4936	ENSRNOG00000060793.1	Eif2s3	eukaryotic translation initiation factor 2 subunit gamma [Source:RGD Symbol;Acc:1561279]
ENSRNOT00000013632.5	2825	2626.77	9088	93.4196	ENSRNOG00000010196.5	Glb1	galactosidase, beta 1 [Source:RGD Symbol;Acc:1597145]
ENSRNOT00000020155.3	2399	2200.77	7613.51	93.4119	ENSRNOG00000014779.5	Pdcd4	programmed cell death 4 [Source:RGD Symbol;Acc:620816]
ENSRNOT00000010968.6	2047	1848.77	6390	93.3275	ENSRNOG00000008144.7	Irf1	interferon regulatory factor 1 [Source:RGD Symbol;Acc:2920]
ENSRNOT00000056432.2	2167	1968.77	6802	93.2896	ENSRNOG00000037302.3	Rad51	RAD51 recombinase [Source:RGD Symbol;Acc:1563603]
ENSRNOT00000081796.1	4876	4677.77	16152.9	93.2404	ENSRNOG00000020871.7	Ltbp4	latent transforming growth factor beta binding protein 4 [Source:RGD Symbol;Acc:1307033]
ENSRNOT00000017375.7	2295	2096.77	7239	93.2222	ENSRNOG00000012378.7	Dbnl	drebrin-like [Source:RGD Symbol;Acc:70941]
ENSRNOT00000011270.4	2695	2496.77	8608.96	93.103	ENSRNOG00000008517.4	Cdc42ep1	CDC42 effector protein 1 [Source:RGD Symbol;Acc:1311131]
ENSRNOT00000067518.1	1348	1149.77	3961	93.0221	ENSRNOG00000003747.6	Get3	guided entry of tail-anchored proteins factor 3, ATPase [Source:RGD Symbol;Acc:1307906]
ENSRNOT00000091941.1	1441	1242.77	4281	93.0137	ENSRNOG00000055984.1	Adrm1	adhesion regulating molecule 1 [Source:RGD Symbol;Acc:69248]
ENSRNOT00000028588.6	1578	1379.77	4752.68	93.0087	ENSRNOG00000021051.6	Cyth2	cytohesin 2 [Source:RGD Symbol;Acc:620398]
ENSRNOT00000042928.3	1378	1179.77	4063	92.9912	ENSRNOG00000029707.3	Mt-nd4	mitochondrially encoded NADH dehydrogenase 4 [Source:RGD Symbol;Acc:620559]
ENSRNOT00000018194.6	1463	1264.77	4353	92.9329	ENSRNOG00000013381.6	Tsg101	tumor susceptibility 101 [Source:RGD Symbol;Acc:3909]
ENSRNOT00000026303.4	3130	2931.77	10078	92.8188	ENSRNOG00000019422.4	Egr1	early growth response 1 [Source:RGD Symbol;Acc:2544]
ENSRNOT00000024224.4	2309	2110.77	7254	92.7958	ENSRNOG00000017977.4	Smpd1	sphingomyelin phosphodiesterase 1 [Source:RGD Symbol;Acc:1549719]
ENSRNOT00000075917.1	1949	1750.77	6011	92.7064	ENSRNOG00000007728.8	Gsdmd	gasdermin D [Source:RGD Symbol;Acc:1307261]
ENSRNOT00000023514.5	2523	2324.77	7981	92.6977	ENSRNOG00000017426.5	Rragc	Ras-related GTP binding C [Source:RGD Symbol;Acc:1311760]
ENSRNOT00000011134.6	2092	1893.77	6500	92.6783	ENSRNOG00000008412.6	Gprc5a	G protein-coupled receptor, class C, group 5, member A [Source:RGD Symbol;Acc:1310804]
ENSRNOT00000027539.7	1019	820.767	2816	92.6412	ENSRNOG00000020317.7	Rab5if	RAB5 interacting factor [Source:RGD Symbol;Acc:1307752]
ENSRNOT00000013301.5	2205	2006.77	6882	92.5995	ENSRNOG00000010007.5	Srsf4	serine and arginine rich splicing factor 4 [Source:RGD Symbol;Acc:1561347]
ENSRNOT00000004797.5	1448	1249.77	4284.1	92.5597	ENSRNOG00000003597.5	Tuba4a	tubulin, alpha 4A [Source:RGD Symbol;Acc:1359623]
ENSRNOT00000006055.7	823	624.767	2141	92.5316	ENSRNOG00000004540.7	Clec3b	C-type lectin domain family 3, member B [Source:RGD Symbol;Acc:1311031]
ENSRNOT00000055137.2	5566	5367.77	18388	92.4981	ENSRNOG00000006548.6	Mrc2	mannose receptor, C type 2 [Source:RGD Symbol;Acc:1559436]
ENSRNOT00000028210.5	1806	1607.77	5507	92.4875	ENSRNOG00000020791.5	Ube2q1	ubiquitin conjugating enzyme E2 Q1 [Source:RGD Symbol;Acc:1305305]
ENSRNOT00000022437.6	1811	1612.77	5523	92.4687	ENSRNOG00000016459.6	Eif3j	eukaryotic translation initiation factor 3, subunit J [Source:RGD Symbol;Acc:1593338]
ENSRNOT00000032926.4	1705	1506.77	5156.81	92.4115	ENSRNOG00000026647.4	Cxcl16	C-X-C motif chemokine ligand 16 [Source:RGD Symbol;Acc:1562928]
ENSRNOT00000074606.2	1990	1791.77	6131.31	92.3981	ENSRNOG00000006077.8	Snx5	sorting nexin 5 [Source:RGD Symbol;Acc:1310190]
ENSRNOT00000022406.6	1222	1023.77	3501.61	92.3544	ENSRNOG00000016227.6	Glrx3	glutaredoxin 3 [Source:RGD Symbol;Acc:69414]
ENSRNOT00000065600.3	6003	5804.77	19831	92.2467	ENSRNOG00000001682.7	Ttc3	tetratricopeptide repeat domain 3 [Source:RGD Symbol;Acc:1308654]
ENSRNOT00000073683.2	1721	1522.77	5201	92.2241	ENSRNOG00000047134.2	Gtf2f1	general transcription factor IIF subunit 1 [Source:RGD Symbol;Acc:1359646]
ENSRNOT00000024866.5	3012	2813.77	9604	92.1627	ENSRNOG00000023317.4	Colgalt1	collagen beta(1-O)galactosyltransferase 1 [Source:RGD Symbol;Acc:1309002]
ENSRNOT00000073950.3	14279	14080.8	48034.5	92.1124	ENSRNOG00000006178.8	Dync1h1	dynein cytoplasmic 1 heavy chain 1 [Source:RGD Symbol;Acc:2511]
ENSRNOT00000021318.4	2078	1879.77	6407.45	92.0391	ENSRNOG00000015670.4	Stx7	syntaxin 7 [Source:RGD Symbol;Acc:619747]
ENSRNOT00000013987.3	2772	2573.77	8770	92.0071	ENSRNOG00000010515.3	Trim59	tripartite motif-containing 59 [Source:RGD Symbol;Acc:1311956]
ENSRNOT00000046888.5	7186	6987.77	23809	92.0013	ENSRNOG00000023334.6	Parp14	poly (ADP-ribose) polymerase family, member 14 [Source:RGD Symbol;Acc:1310490]
ENSRNOT00000027264.4	2826	2627.77	8953	91.9968	ENSRNOG00000019975.5	Cdc5l	cell division cycle 5-like [Source:RGD Symbol;Acc:70892]
ENSRNOT00000007634.6	1356	1157.77	3938.37	91.8516	ENSRNOG00000005767.7	Tulp3	TUB like protein 3 [Source:RGD Symbol;Acc:1585259]
ENSRNOT00000091387.1	1361	1162.77	3954.98	91.8424	ENSRNOG00000058580.1	Paip1	poly(A) binding protein interacting protein 1 [Source:RGD Symbol;Acc:1305668]
ENSRNOT00000001444.6	1298	1099.77	3739	91.8007	ENSRNOG00000001088.6	Rfc3	replication factor C subunit 3 [Source:RGD Symbol;Acc:1306832]
ENSRNOT00000083471.1	948	749.767	2545.25	91.6631	ENSRNOG00000001420.8	Fis1	fission, mitochondrial 1 [Source:RGD Symbol;Acc:1306668]
ENSRNOT00000027815.6	1479	1280.77	4346.52	91.6354	ENSRNOG00000020500.6	Scamp3	secretory carrier membrane protein 3 [Source:RGD Symbol;Acc:68351]
ENSRNOT00000045233.3	2443	2244.77	7617	91.6229	ENSRNOG00000030888.4	Rela	RELA proto-oncogene, NF-kB subunit [Source:RGD Symbol;Acc:727889]
ENSRNOT00000020453.6	1889	1690.77	5737	91.6204	ENSRNOG00000015217.6	Ltv1	LTV1 ribosome biogenesis factor [Source:RGD Symbol;Acc:1311264]
ENSRNOT00000086236.1	3451	3252.77	11030	91.5617	ENSRNOG00000016511.6	Pitrm1	pitrilysin metallopeptidase 1 [Source:RGD Symbol;Acc:1310998]
ENSRNOT00000028067.4	1071	872.767	2958	91.5147	ENSRNOG00000020678.5	Ifi35	interferon-induced protein 35 [Source:RGD Symbol;Acc:1304553]
ENSRNOT00000028475.7	509	311.849	1056.01	91.4358	ENSRNOG00000020975.7	Mrpl49	mitochondrial ribosomal protein L49 [Source:RGD Symbol;Acc:1309920]
ENSRNOT00000074649.2	4266	4067.77	13767.4	91.3875	ENSRNOG00000048205.2	Ube2h	ubiquitin-conjugating enzyme E2H [Source:RGD Symbol;Acc:2319288]
ENSRNOT00000061332.5	2991	2792.77	9444.89	91.3173	ENSRNOG00000012346.8	Epb41l2	erythrocyte membrane protein band 4.1-like 2 [Source:RGD Symbol;Acc:1563977]
ENSRNOT00000025878.5	4758	4559.77	15416	91.2894	ENSRNOG00000018977.5	Ap3d1	adaptor related protein complex 3 subunit delta 1 [Source:RGD Symbol;Acc:1308659]
ENSRNOT00000014508.3	2575	2376.77	8034	91.2717	ENSRNOG00000010557.3	Smarcd2	SWI/SNF related, matrix associated, actin dependent regulator of chromatin, subfamily d, member 2 [Source:RGD Symbol;Acc:69289]
ENSRNOT00000027614.7	1608	1409.77	4765	91.2655	ENSRNOG00000020376.7	Stn1	STN1 subunit of CST complex [Source:RGD Symbol;Acc:1305637]
ENSRNOT00000004232.5	3886	3687.77	12463	91.2536	ENSRNOG00000003084.5	Parp1	poly (ADP-ribose) polymerase 1 [Source:RGD Symbol;Acc:2053]
ENSRNOT00000034152.6	1017	818.767	2764.02	91.1533	ENSRNOG00000022769.6	Sp100	SP100 nuclear antigen [Source:RGD Symbol;Acc:1359550]
ENSRNOT00000007276.5	2011	1812.77	6118.99	91.1442	ENSRNOG00000005256.5	Zc3h15	zinc finger CCCH-type containing 15 [Source:RGD Symbol;Acc:1359234]
ENSRNOT00000068274.2	2219	2020.77	6820	91.1296	ENSRNOG00000005686.6	Suclg2	succinate-CoA ligase, GDP-forming, beta subunit [Source:RGD Symbol;Acc:1305008]
ENSRNOT00000036959.6	3178	2979.77	10043	91.0065	ENSRNOG00000031544.5	Larp1	La ribonucleoprotein 1, translational regulator [Source:RGD Symbol;Acc:1306683]
ENSRNOT00000054681.4	1679	1480.77	4990.07	90.9937	ENSRNOG00000036576.4	Zdhhc6	zinc finger, DHHC-type containing 6 [Source:RGD Symbol;Acc:1304657]
ENSRNOT00000025104.6	3371	3172.77	10690.7	90.9824	ENSRNOG00000018176.7	Rab6a	RAB6A, member RAS oncogene family [Source:RGD Symbol;Acc:619737]
ENSRNOT00000003106.6	1316	1117.77	3762.73	90.8955	ENSRNOG00000002270.7	Hnrnpdl	heterogeneous nuclear ribonucleoprotein D-like [Source:RGD Symbol;Acc:1309950]
ENSRNOT00000065871.1	3284	3085.77	10375	90.7854	ENSRNOG00000010237.6	Map7d1	MAP7 domain containing 1 [Source:RGD Symbol;Acc:1597986]
ENSRNOT00000088707.1	4122	3923.77	13180	90.699	ENSRNOG00000059097.1	AABR07025140.1
ENSRNOT00000074420.3	588	390.047	1310	90.6871	ENSRNOG00000048708.3	Exosc1	exosome component 1 [Source:RGD Symbol;Acc:1591855]
ENSRNOT00000025904.6	2514	2315.77	7774	90.6444	ENSRNOG00000019147.7	Stom	stomatin [Source:RGD Symbol;Acc:1305109]
ENSRNOT00000006531.6	1185	986.767	3309	90.5469	ENSRNOG00000004629.6	Fkbp3	FKBP prolyl isomerase 3 [Source:RGD Symbol;Acc:1304992]
ENSRNOT00000024695.6	1400	1201.77	4029.78	90.5425	ENSRNOG00000018214.6	Bok	BCL2 family apoptosis regulator BOK [Source:RGD Symbol;Acc:70984]
ENSRNOT00000055893.1	279	106.507	357	90.5072	ENSRNOG00000037087.1	LOC108351584	uncharacterized LOC108351584 [Source:RGD Symbol;Acc:11406985]
ENSRNOT00000027662.7	774	575.767	1929	90.4642	ENSRNOG00000042720.3	Mrpl28	mitochondrial ribosomal protein L28 [Source:RGD Symbol;Acc:1583741]
ENSRNOT00000026235.3	3070	2871.77	9619	90.4423	ENSRNOG00000019311.3	Nfkb2	nuclear factor kappa B subunit 2 [Source:RGD Symbol;Acc:1307189]
ENSRNOT00000011855.5	1348	1149.77	3850.35	90.4235	ENSRNOG00000008490.5	Cwc15	CWC15 spliceosome-associated protein [Source:RGD Symbol;Acc:1310669]
ENSRNOT00000064809.3	3405	3206.77	10731	90.3574	ENSRNOG00000014872.7	Sec24d	SEC24 homolog D, COPII coat complex component [Source:RGD Symbol;Acc:1311720]
ENSRNOT00000057096.4	1183	984.767	3293.46	90.3047	ENSRNOG00000037638.4	Timm50	translocase of inner mitochondrial membrane 50 [Source:RGD Symbol;Acc:1587684]
ENSRNOT00000027782.6	723	524.804	1754.59	90.2758	ENSRNOG00000020487.6	Coa3	cytochrome C oxidase assembly factor 3 [Source:RGD Symbol;Acc:1564337]
ENSRNOT00000023469.7	635	436.911	1459	90.1682	ENSRNOG00000017427.8	LOC100909840	profilin-2-like [Source:RGD Symbol;Acc:6501768]
ENSRNOT00000026799.5	1647	1448.77	4837	90.1506	ENSRNOG00000019772.5	Dnpep	aspartyl aminopeptidase [Source:RGD Symbol;Acc:1583848]
ENSRNOT00000009649.5	2379	2180.77	7279.73	90.1358	ENSRNOG00000007203.5	Psmc6	proteasome 26S subunit, ATPase 6 [Source:RGD Symbol;Acc:1308825]
ENSRNOT00000023215.5	2837	2638.77	8806	90.1091	ENSRNOG00000017230.5	Cox15	cytochrome c oxidase assembly homolog COX15 [Source:RGD Symbol;Acc:1312043]
ENSRNOT00000019623.7	855	656.767	2191	90.0787	ENSRNOG00000014330.7	Pcmt1	protein-L-isoaspartate (D-aspartate) O-methyltransferase 1 [Source:RGD Symbol;Acc:3268]
ENSRNOT00000009398.4	904	705.767	2354	90.0609	ENSRNOG00000007040.4	Timm17a	translocase of inner mitochondrial membrane 17A [Source:RGD Symbol;Acc:3862]
ENSRNOT00000005930.4	2019	1820.77	6065	89.943	ENSRNOG00000004494.5	Lta4h	leukotriene A4 hydrolase [Source:RGD Symbol;Acc:1311333]
ENSRNOT00000041483.3	462	266.251	886.319	89.8855	ENSRNOG00000052207.1	LOC100909878	40S ribosomal protein S15a-like [Source:RGD Symbol;Acc:6501297]
ENSRNOT00000023927.5	2773	2574.77	8569	89.8635	ENSRNOG00000017745.5	Cog4	component of oligomeric golgi complex 4 [Source:RGD Symbol;Acc:1310549]
ENSRNOT00000028672.7	1788	1589.77	5290.27	89.8536	ENSRNOG00000021113.7	Uba2	ubiquitin-like modifier activating enzyme 2 [Source:RGD Symbol;Acc:1312023]
ENSRNOT00000074392.2	633	434.911	1446	89.7757	ENSRNOG00000050552.2	AABR07053516.1
ENSRNOT00000015869.8	1785	1586.77	5271.99	89.7124	ENSRNOG00000011489.8	R3hdm4	R3H domain containing 4 [Source:RGD Symbol;Acc:1307067]
ENSRNOT00000049621.3	543	345.316	1147	89.6886	ENSRNOG00000030445.3	Ormdl3	ORMDL sphingolipid biosynthesis regulator 3 [Source:RGD Symbol;Acc:1560577]
ENSRNOT00000037710.4	2412	2213.77	7350	89.6492	ENSRNOG00000022623.4	Ttll12	tubulin tyrosine ligase like 12 [Source:RGD Symbol;Acc:1305319]
ENSRNOT00000014397.7	759	560.785	1861.79	89.6448	ENSRNOG00000010732.7	RGD1561590	similar to SAP18 [Source:RGD Symbol;Acc:1561590]
ENSRNOT00000056995.4	1761	1562.77	5186	89.6044	ENSRNOG00000033747.5	Sp110	SP110 nuclear body protein [Source:RGD Symbol;Acc:1310173]
ENSRNOT00000009073.7	1380	1181.77	3918.71	89.537	ENSRNOG00000006094.8	Cd44	CD44 molecule (Indian blood group) [Source:RGD Symbol;Acc:2307]
ENSRNOT00000009155.5	1110	911.767	3022.81	89.5196	ENSRNOG00000030520.3	Sarnp	SAP domain containing ribonucleoprotein [Source:RGD Symbol;Acc:1305692]
ENSRNOT00000028678.7	3117	2918.77	9668	89.4393	ENSRNOG00000021117.7	Rps6ka4	ribosomal protein S6 kinase A4 [Source:RGD Symbol;Acc:1307277]
ENSRNOT00000088097.1	2148	1949.77	6453.98	89.3792	ENSRNOG00000055853.1	Gorasp2	golgi reassembly stacking protein 2 [Source:RGD Symbol;Acc:619911]
ENSRNOT00000027428.5	1207	1008.77	3336.5	89.3083	ENSRNOG00000020229.7	Homer3	homer scaffold protein 3 [Source:RGD Symbol;Acc:620706]
ENSRNOT00000013151.6	1294	1095.77	3623	89.2774	ENSRNOG00000009535.6	Stoml2	stomatin like 2 [Source:RGD Symbol;Acc:1308285]
ENSRNOT00000087143.1	2473	2274.77	7520.45	89.2685	ENSRNOG00000052289.1	Ptdss1	phosphatidylserine synthase 1 [Source:RGD Symbol;Acc:1308949]
ENSRNOT00000006964.5	1586	1387.77	4584	89.1906	ENSRNOG00000005115.5	Asf1b	anti-silencing function 1B histone chaperone [Source:RGD Symbol;Acc:1304918]
ENSRNOT00000066226.2	5373	5174.77	17086	89.154	ENSRNOG00000022325.6	Smc2	structural maintenance of chromosomes 2 [Source:RGD Symbol;Acc:1305227]
ENSRNOT00000028431.6	2995	2796.77	9234	89.1507	ENSRNOG00000020935.6	Capn1	calpain 1 [Source:RGD Symbol;Acc:2267]
ENSRNOT00000025644.6	1235	1036.77	3423.04	89.1502	ENSRNOG00000018904.7	Dtymk	deoxythymidylate kinase [Source:RGD Symbol;Acc:1309614]
ENSRNOT00000001403.4	1289	1090.77	3600	89.1172	ENSRNOG00000001061.6	Rilpl2	Rab interacting lysosomal protein-like 2 [Source:RGD Symbol;Acc:1303140]
ENSRNOT00000083169.1	2056	1857.77	6131	89.111	ENSRNOG00000061176.1	Nudt3	nudix hydrolase 3 [Source:RGD Symbol;Acc:1310183]
ENSRNOT00000078579.1	2752	2553.77	8427.12	89.1023	ENSRNOG00000057988.1	Pfkm	phosphofructokinase, muscle [Source:RGD Symbol;Acc:68419]
ENSRNOT00000024884.6	1109	910.767	3005	89.0899	ENSRNOG00000018410.6	Nfu1	NFU1 iron-sulfur cluster scaffold [Source:RGD Symbol;Acc:1307823]
ENSRNOT00000054686.2	4108	3909.77	12897.3	89.0715	ENSRNOG00000014173.7	Smc3	structural maintenance of chromosomes 3 [Source:RGD Symbol;Acc:62006]
ENSRNOT00000088273.1	2931	2732.77	9012	89.045	ENSRNOG00000055365.1	Edem1	ER degradation enhancing alpha-mannosidase like protein 1 [Source:RGD Symbol;Acc:1563633]
ENSRNOT00000056105.3	3623	3424.77	11277.2	88.9122	ENSRNOG00000018194.7	Srrm1	serine and arginine repetitive matrix 1 [Source:RGD Symbol;Acc:1311258]
ENSRNOT00000089418.1	4077	3878.77	12744.6	88.7206	ENSRNOG00000001299.6	Sun1	Sad1 and UNC84 domain containing 1 [Source:RGD Symbol;Acc:1359142]
ENSRNOT00000060832.2	3612	3413.77	11215.1	88.7078	ENSRNOG00000000851.8	Bag6	BCL2-associated athanogene 6 [Source:RGD Symbol;Acc:71064]
ENSRNOT00000075365.2	2485	2286.77	7501	88.5704	ENSRNOG00000049951.2	Tmem151a	transmembrane protein 151A [Source:RGD Symbol;Acc:1310680]
ENSRNOT00000026364.4	1598	1399.77	4589	88.5225	ENSRNOG00000019478.5	Irf9	interferon regulatory factor 9 [Source:RGD Symbol;Acc:1308766]
ENSRNOT00000015299.5	1753	1554.77	5095.92	88.501	ENSRNOG00000010895.6	Tmem30a	transmembrane protein 30A [Source:RGD Symbol;Acc:1303315]
ENSRNOT00000028217.6	1710	1511.77	4953	88.4656	ENSRNOG00000020793.6	Ruvbl2	RuvB-like AAA ATPase 2 [Source:RGD Symbol;Acc:1306509]
ENSRNOT00000059467.4	412	219.15	718	88.4655	ENSRNOG00000038902.4	Rbis	ribosomal biogenesis factor [Source:RGD Symbol;Acc:1565641]
ENSRNOT00000005347.5	2579	2380.77	7797.99	88.4416	ENSRNOG00000003990.6	Grb2	growth factor receptor bound protein 2 [Source:RGD Symbol;Acc:619758]
ENSRNOT00000031977.4	5031	4832.77	15826	88.4232	ENSRNOG00000000257.6	Smpd3	sphingomyelin phosphodiesterase 3 [Source:RGD Symbol;Acc:619754]
ENSRNOT00000021284.5	261	93.4511	306	88.4155	ENSRNOG00000015848.5	Etfrf1	electron transfer flavoprotein regulatory factor 1 [Source:RGD Symbol;Acc:2320673]
ENSRNOT00000010373.5	1739	1540.77	5044.35	88.4014	ENSRNOG00000007629.7	Sf3a3	splicing factor 3a, subunit 3 [Source:RGD Symbol;Acc:1308726]
ENSRNOT00000049448.3	1410	1211.77	3957.87	88.193	ENSRNOG00000029810.3	LOC100911766	tetraspanin-4-like [Source:RGD Symbol;Acc:6490894]
ENSRNOT00000005961.5	2539	2340.77	7643	88.1651	ENSRNOG00000004481.5	Adss	adenylosuccinate synthase [Source:RGD Symbol;Acc:1310508]
ENSRNOT00000010386.7	1457	1258.77	4107	88.0989	ENSRNOG00000007788.7	Glod4	glyoxalase domain containing 4 [Source:RGD Symbol;Acc:1307010]
ENSRNOT00000032387.7	2776	2577.77	8410.18	88.0953	ENSRNOG00000023668.7	Scyl1	SCY1 like pseudokinase 1 [Source:RGD Symbol;Acc:1307330]
ENSRNOT00000075257.1	192	48.8258	159.152	88.0143	ENSRNOG00000050337.1	AABR07054264.1
ENSRNOT00000072838.3	1728	1529.77	4984.62	87.9829	ENSRNOG00000048580.3	Trip6	thyroid hormone receptor interactor 6 [Source:RGD Symbol;Acc:1583180]
ENSRNOT00000037890.4	1113	914.767	2979.8	87.9565	ENSRNOG00000027408.4	Ppid	peptidylprolyl isomerase D [Source:RGD Symbol;Acc:1303174]
[truncated: 29,717 more rows]
