# Supplementary figures and images for: Genetic Characterization of Rat Hepatic Stellate Cell Line HSC-T6 for In Vitro Cell Line Authentication
Source: MDPI journal article supplement (doi:10.3390/cells11111783), 2022-05-29

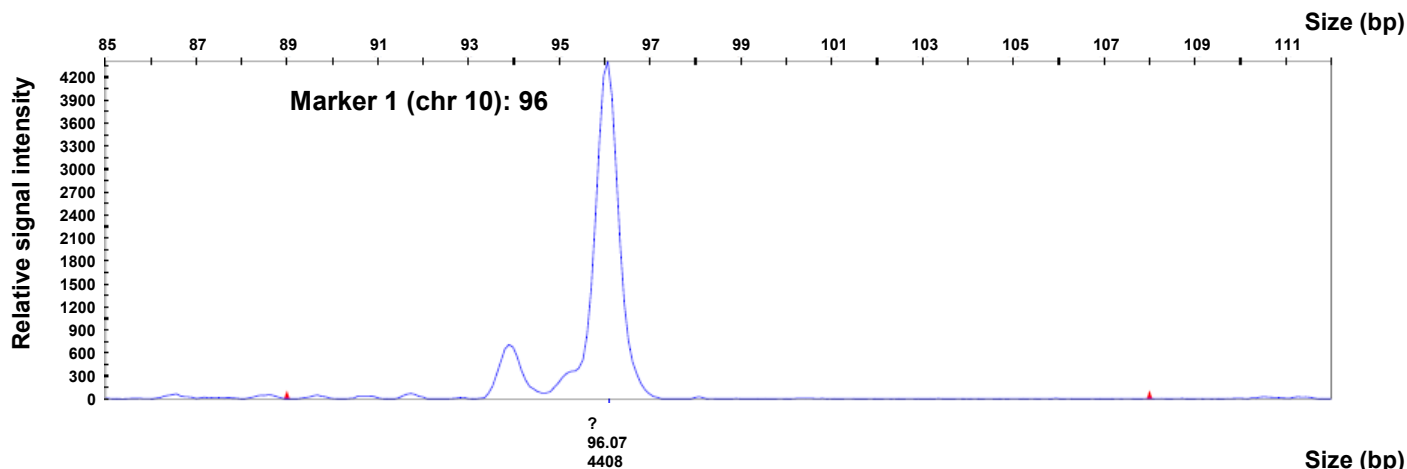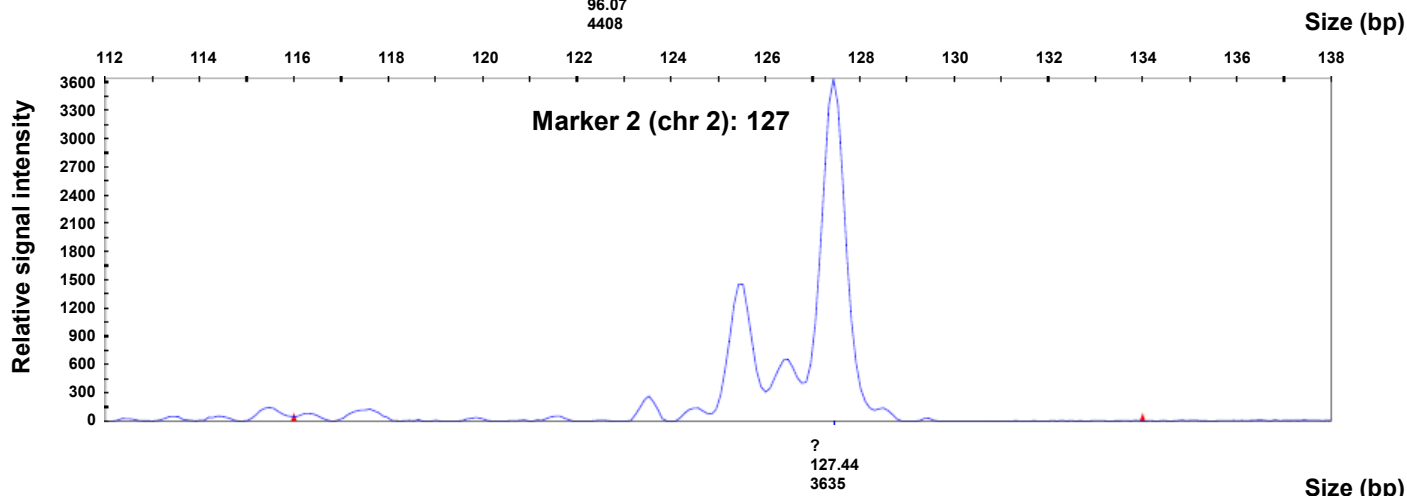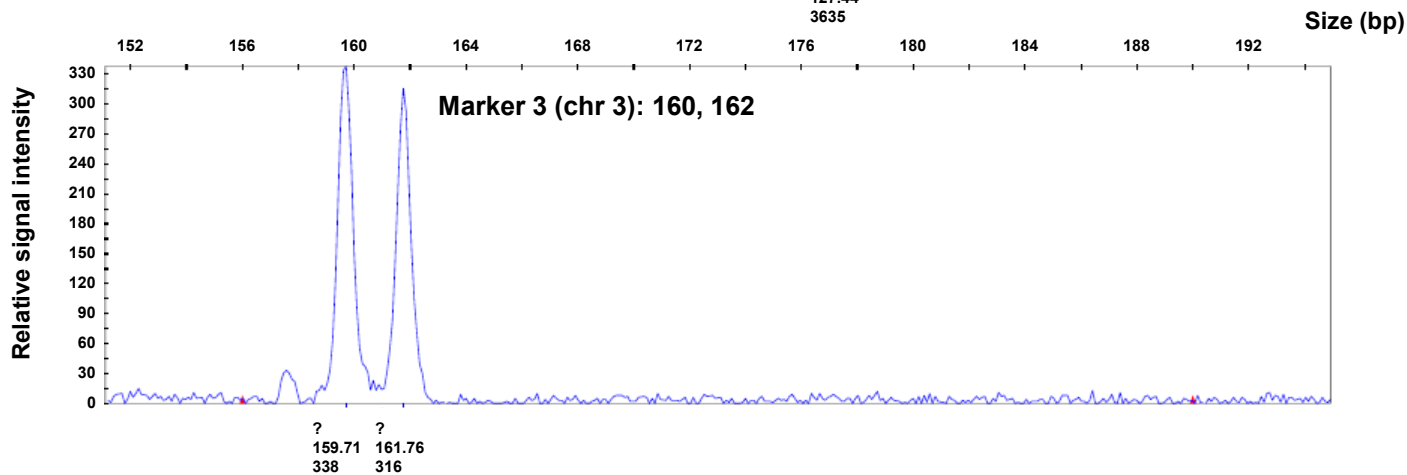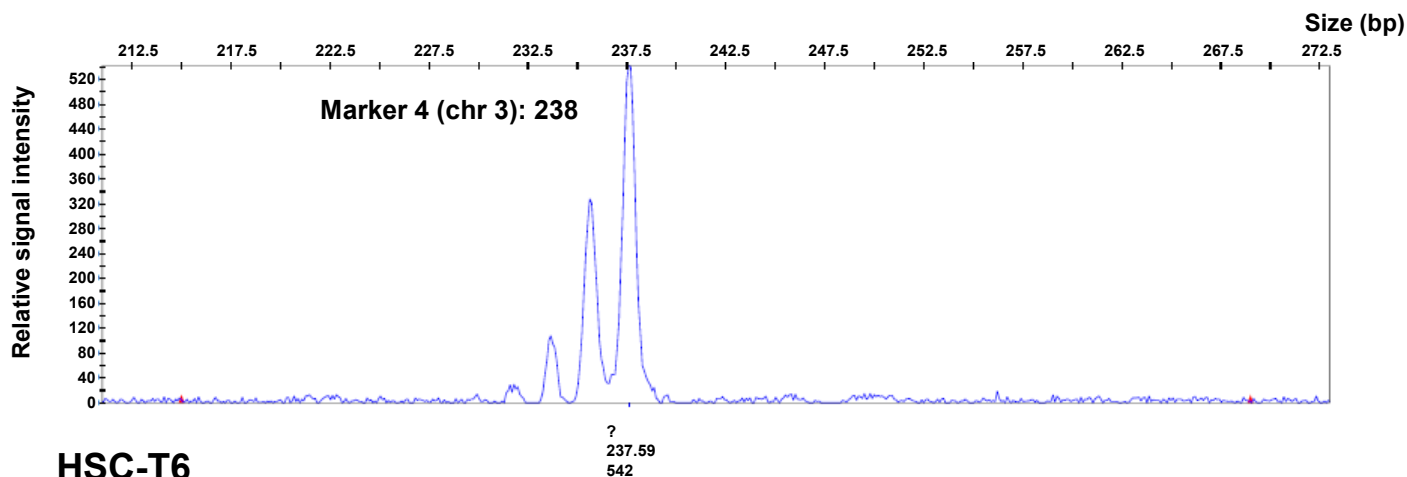

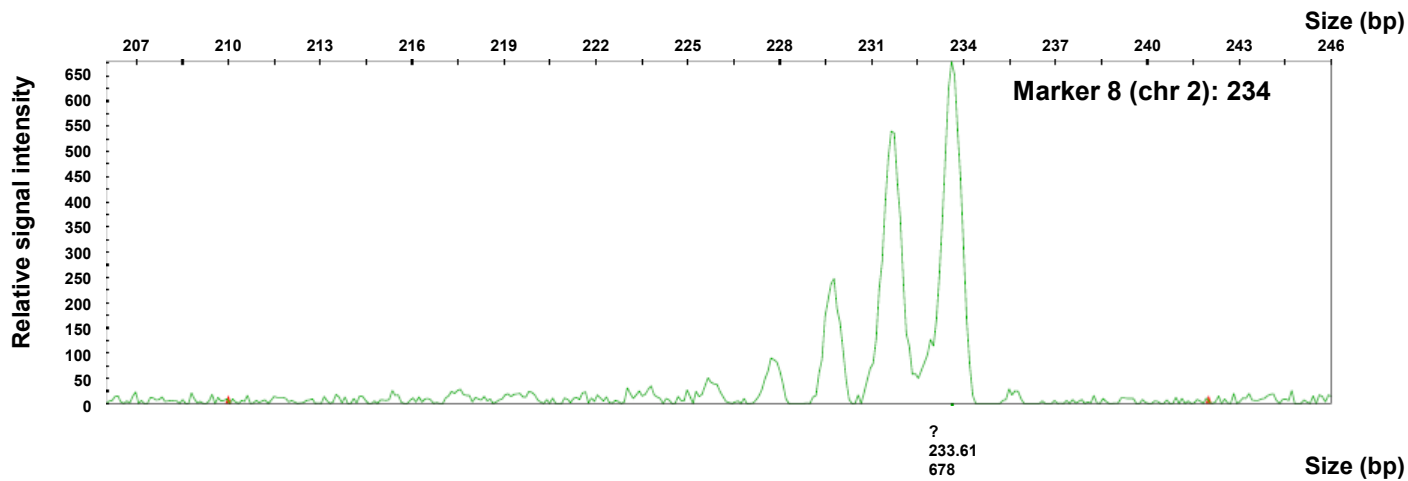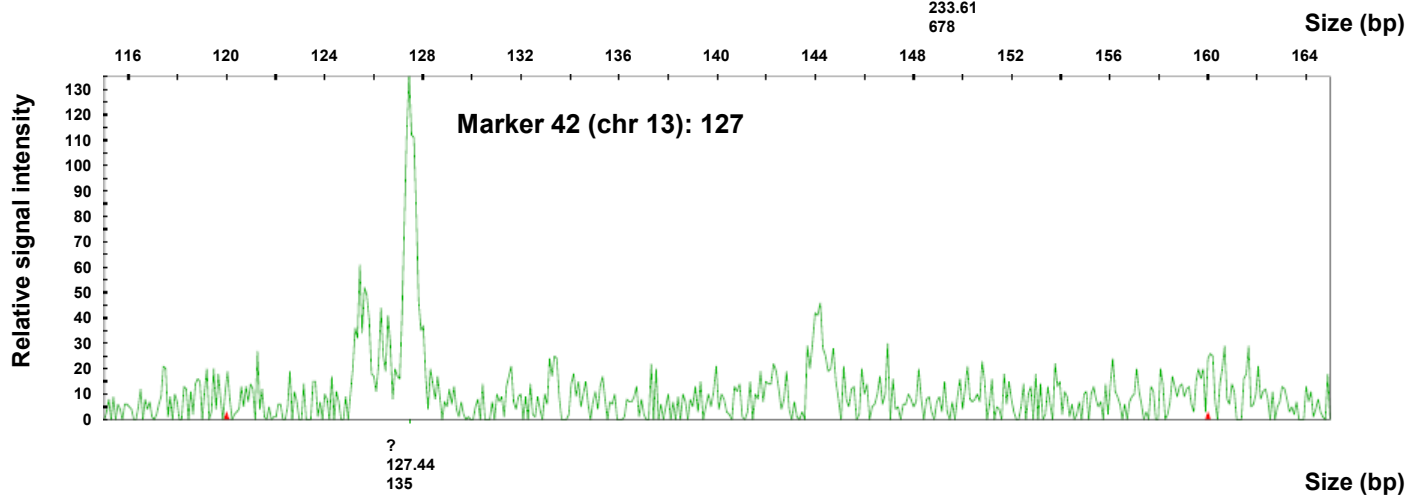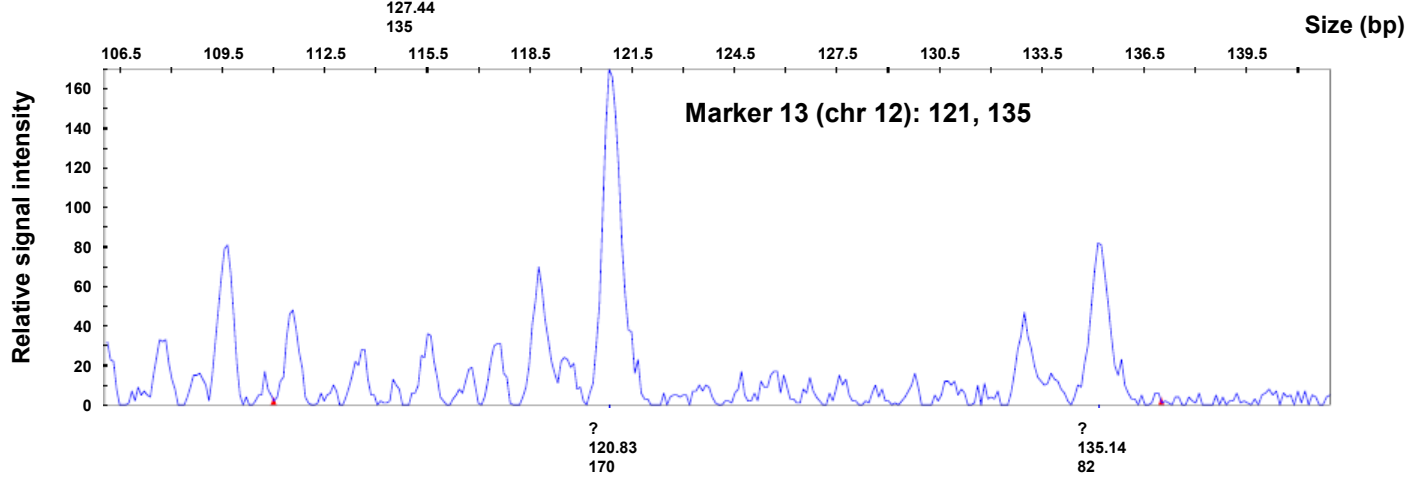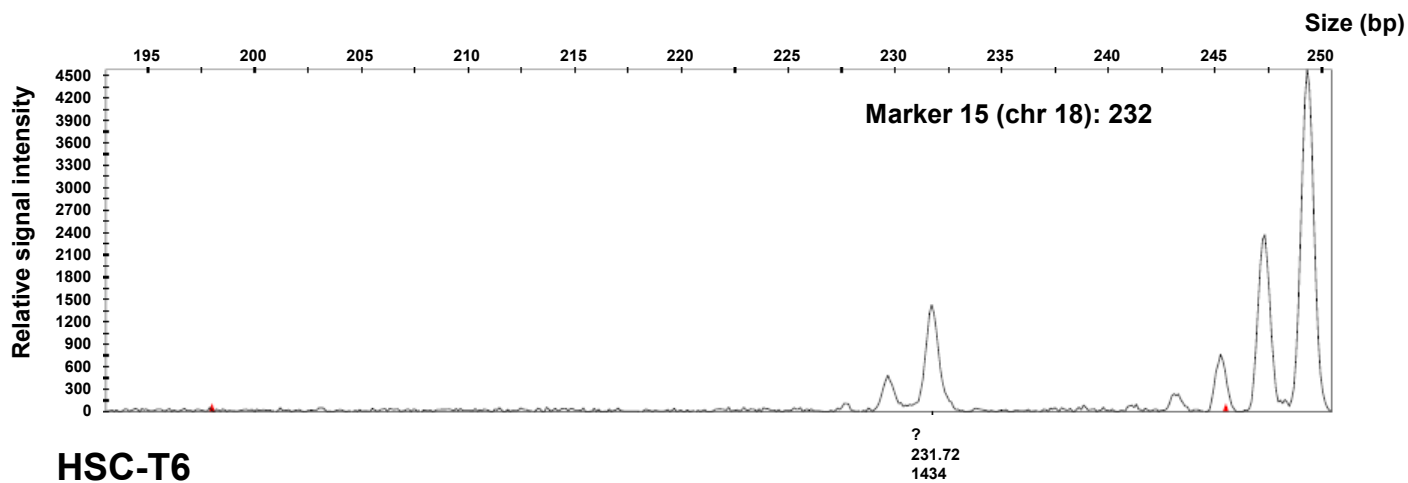

HSC-T6

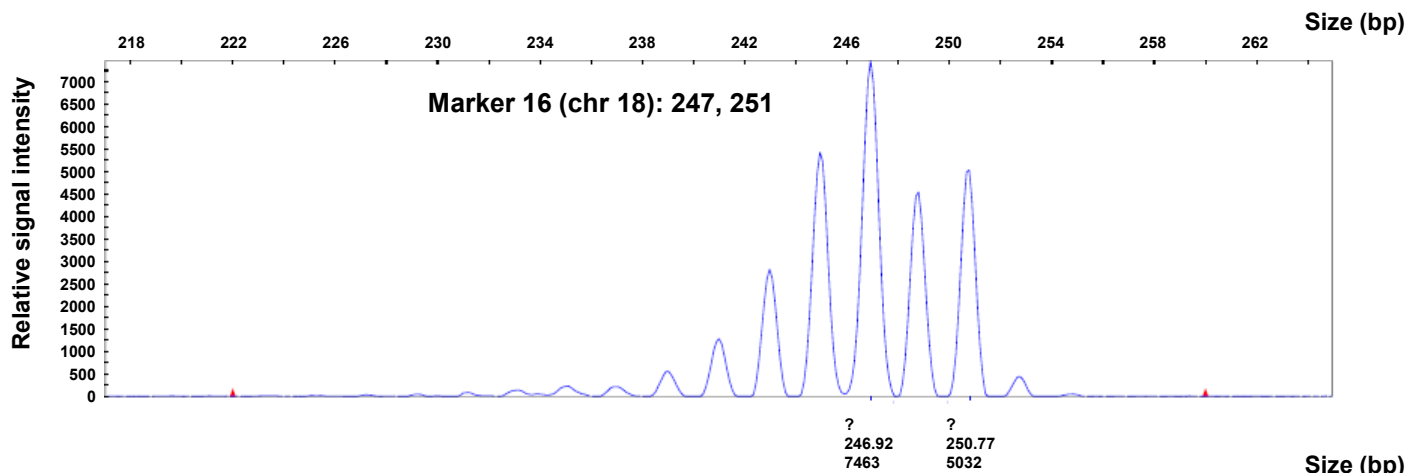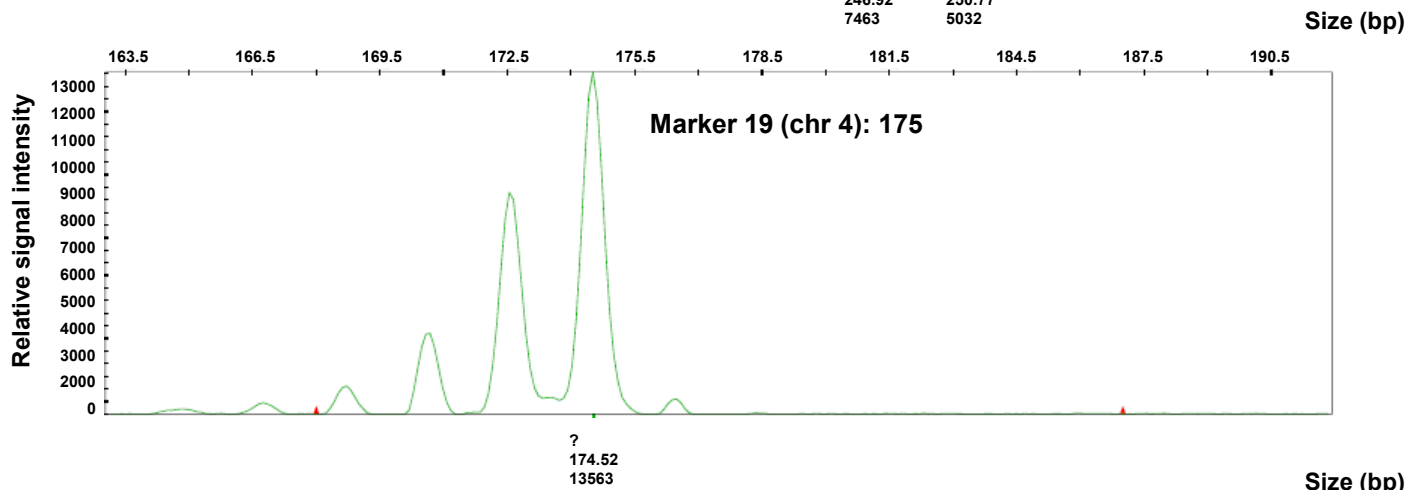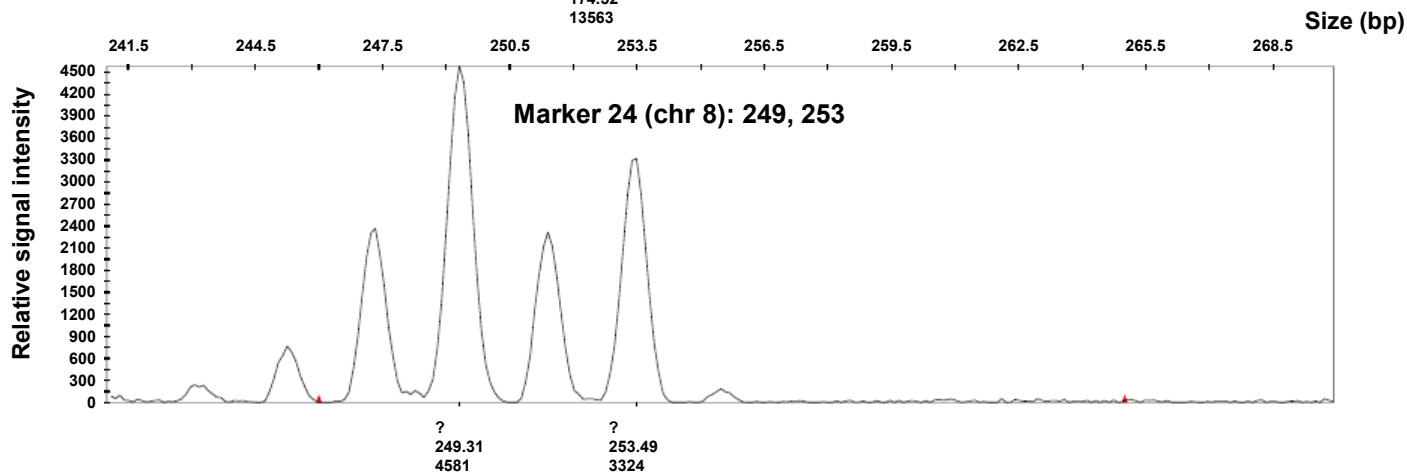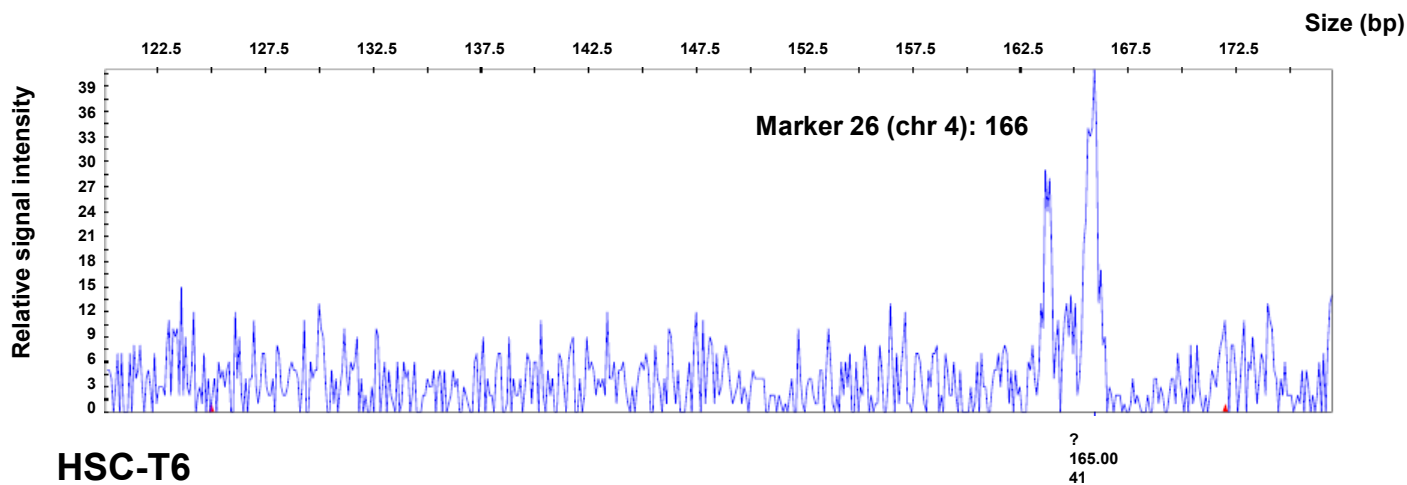

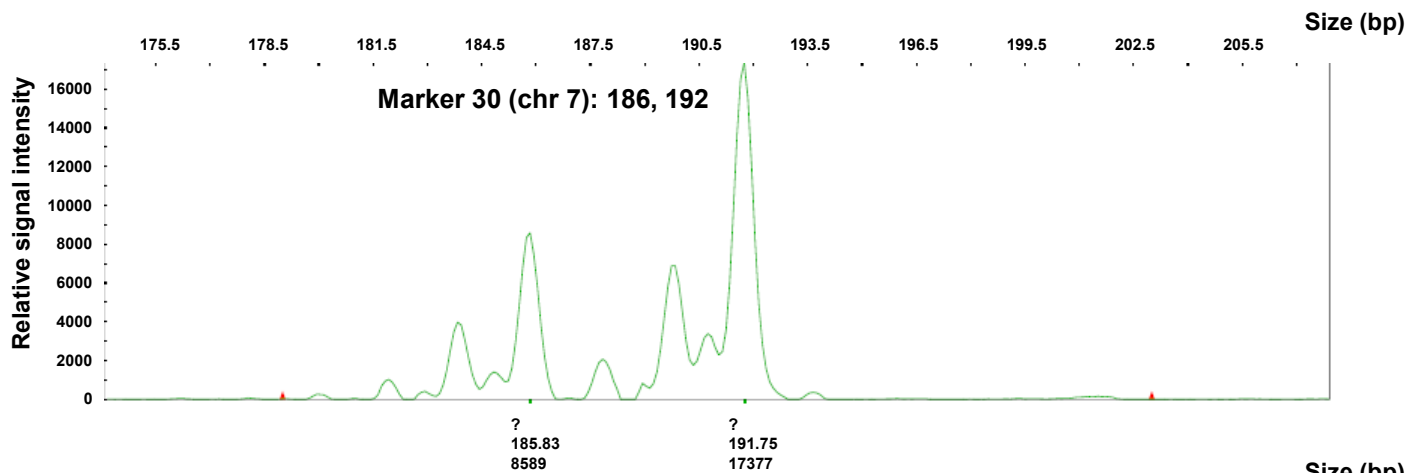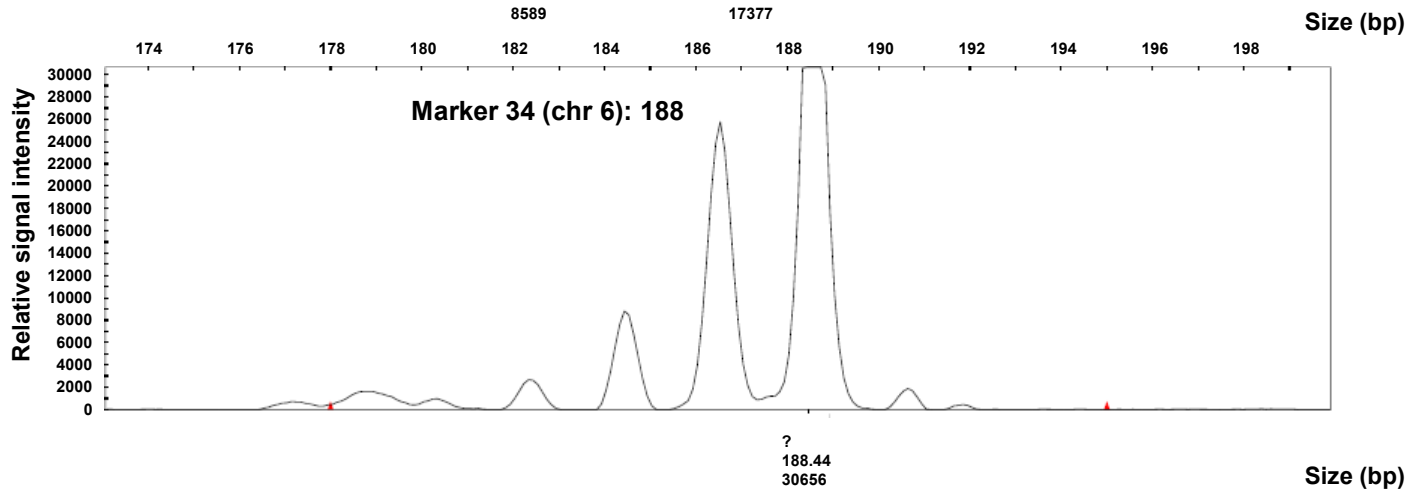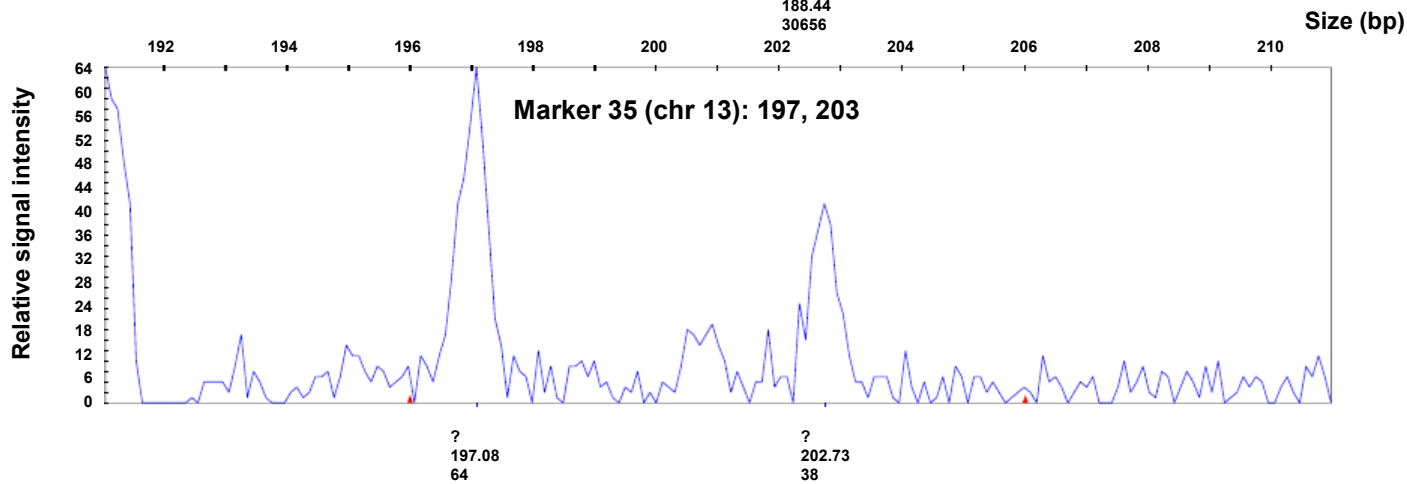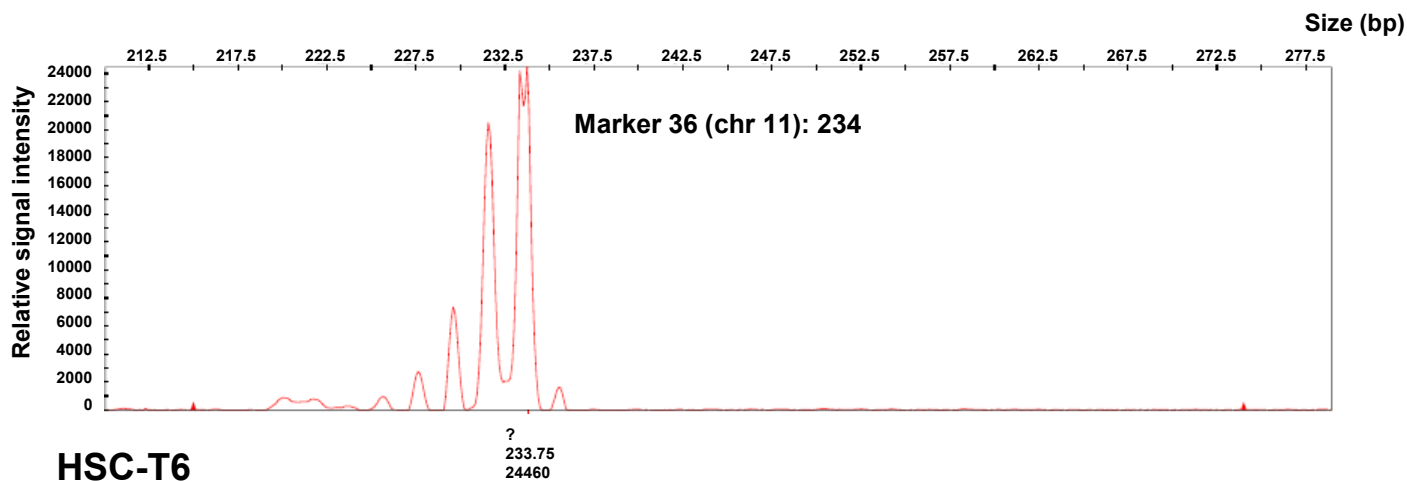

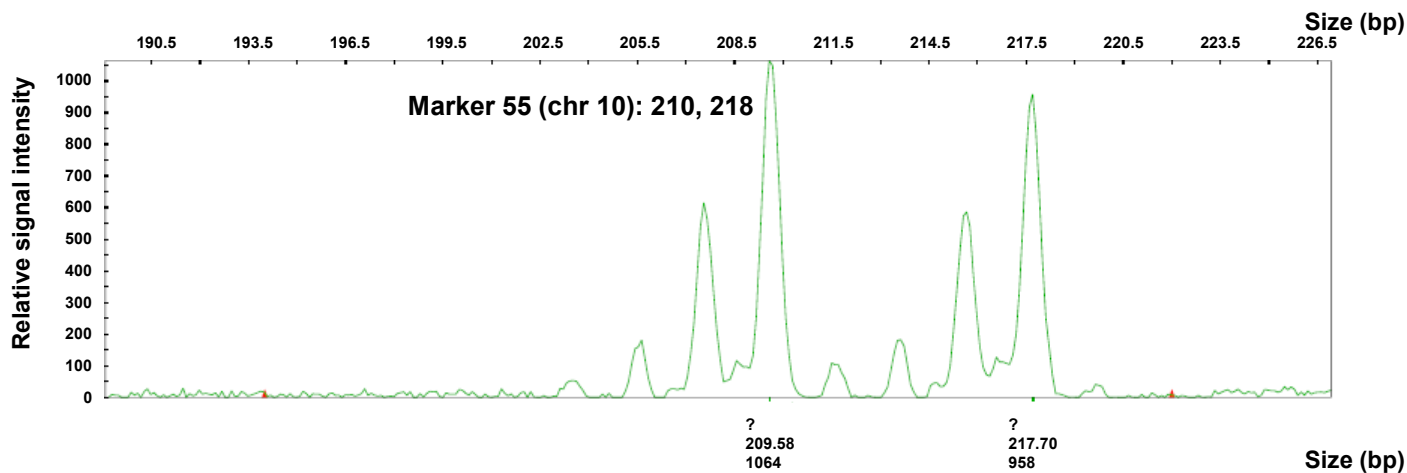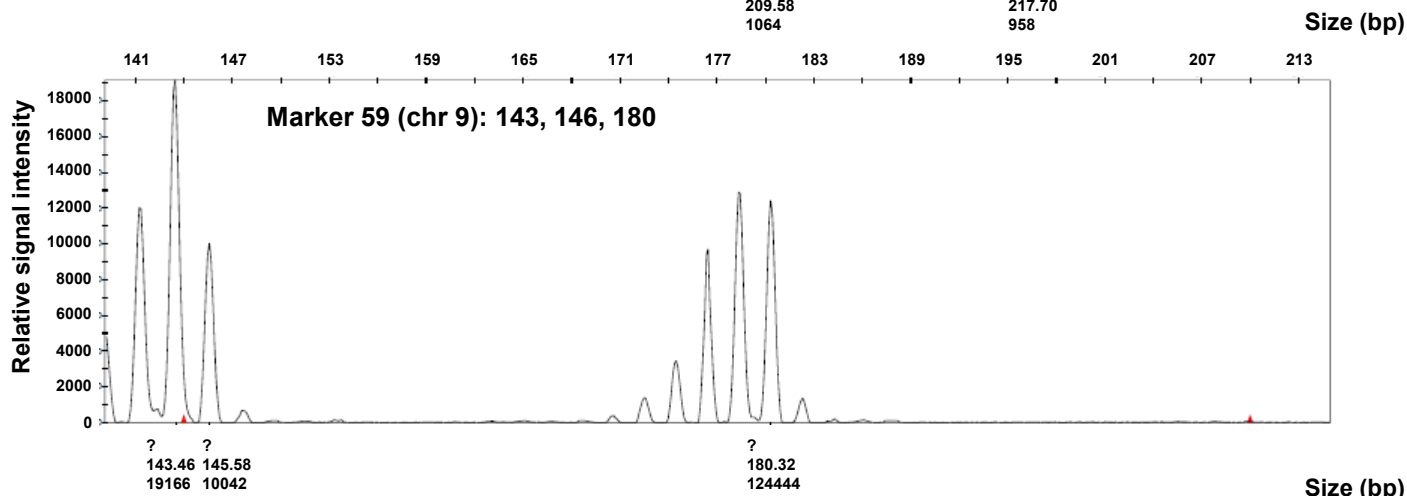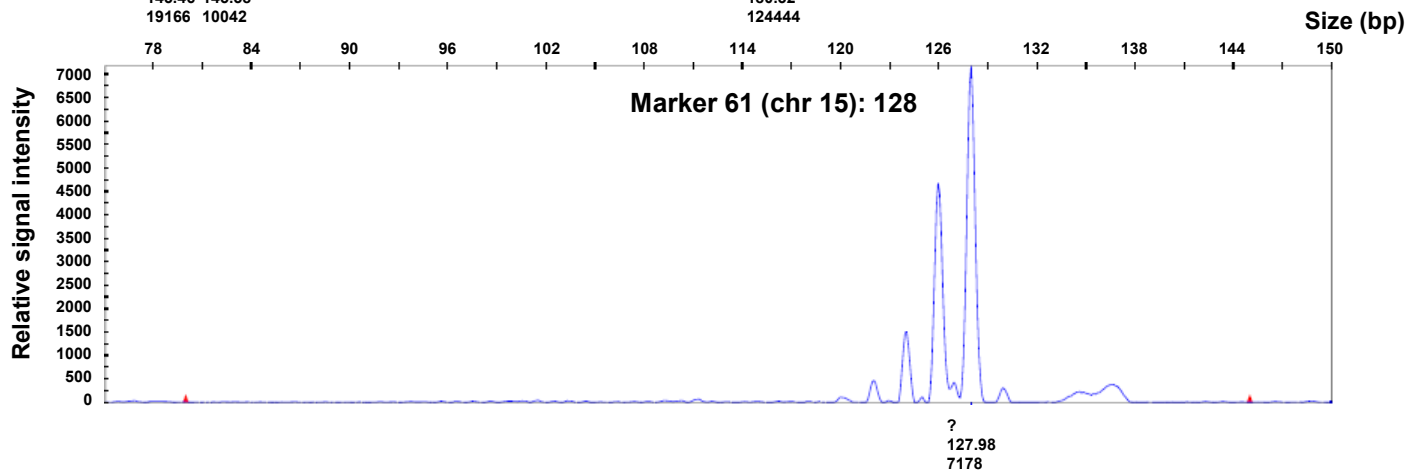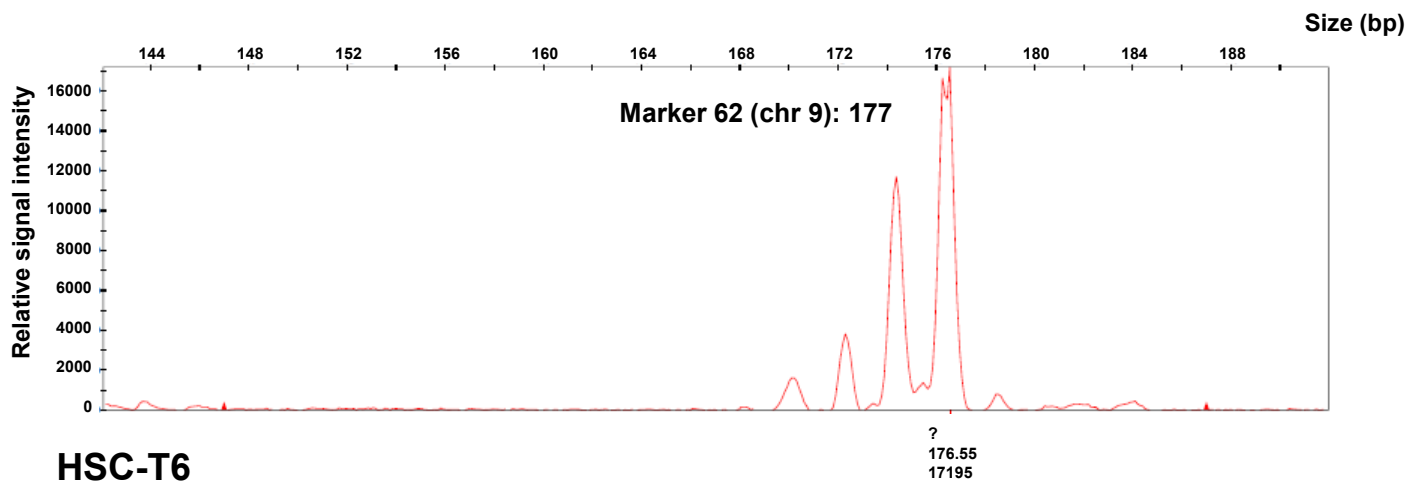

HSC-T6

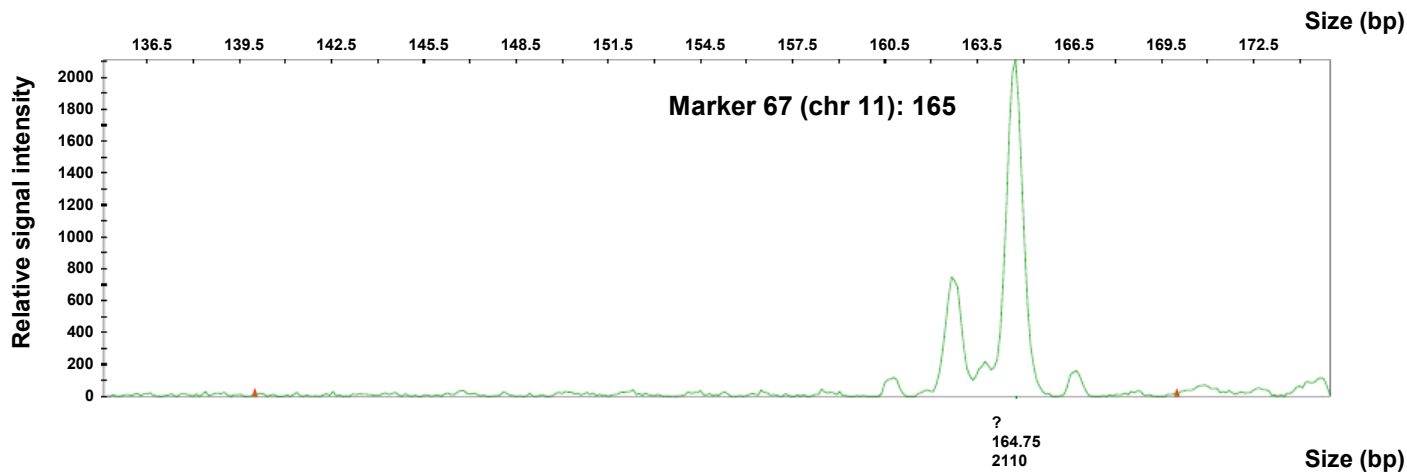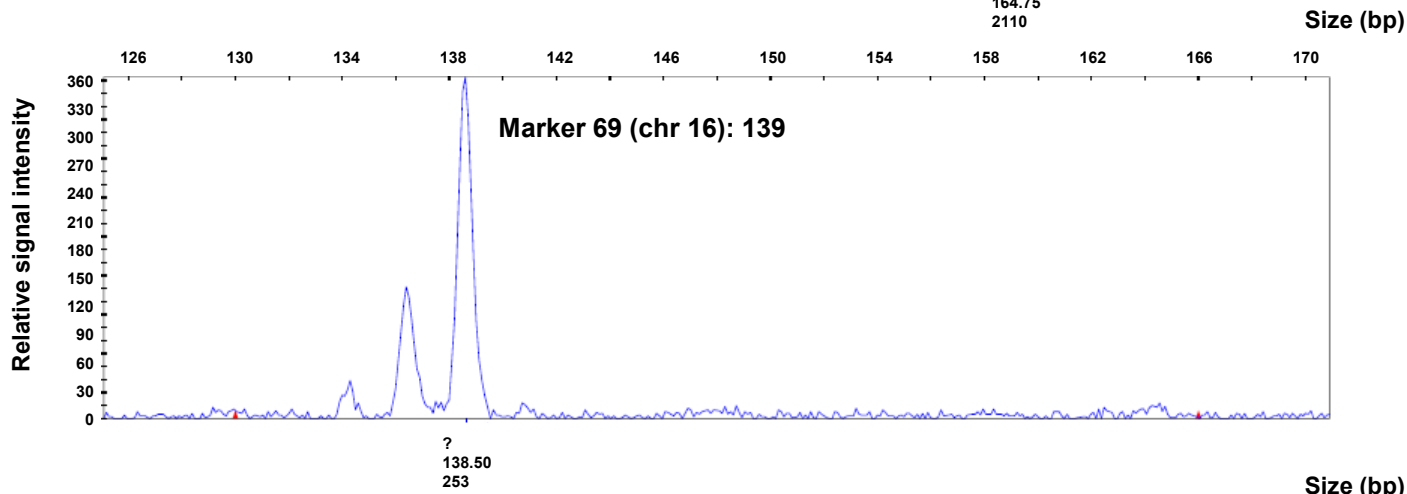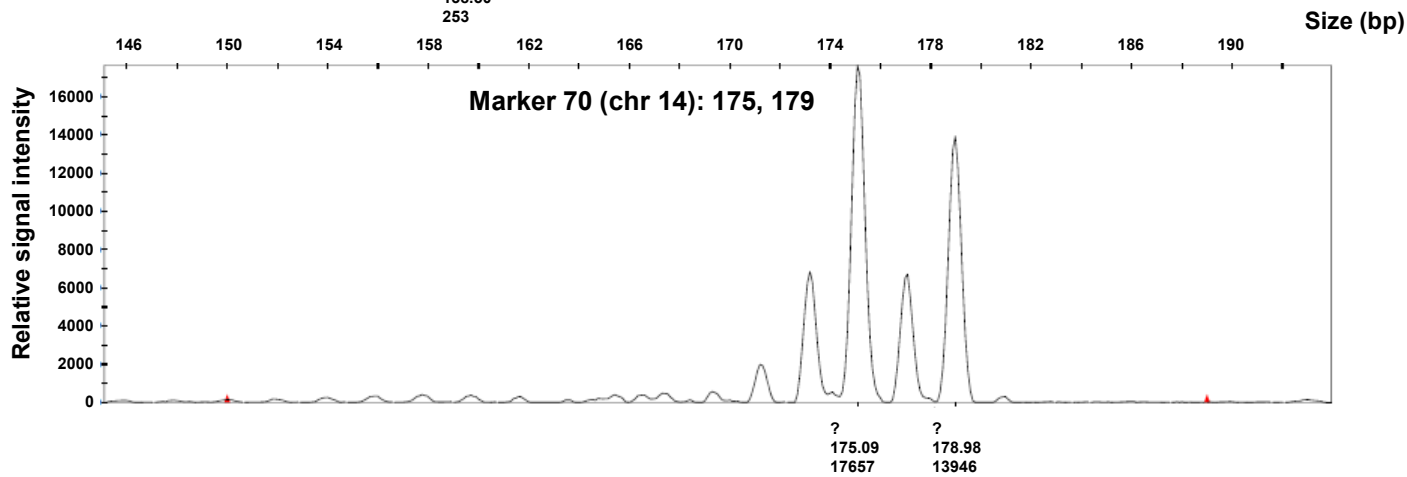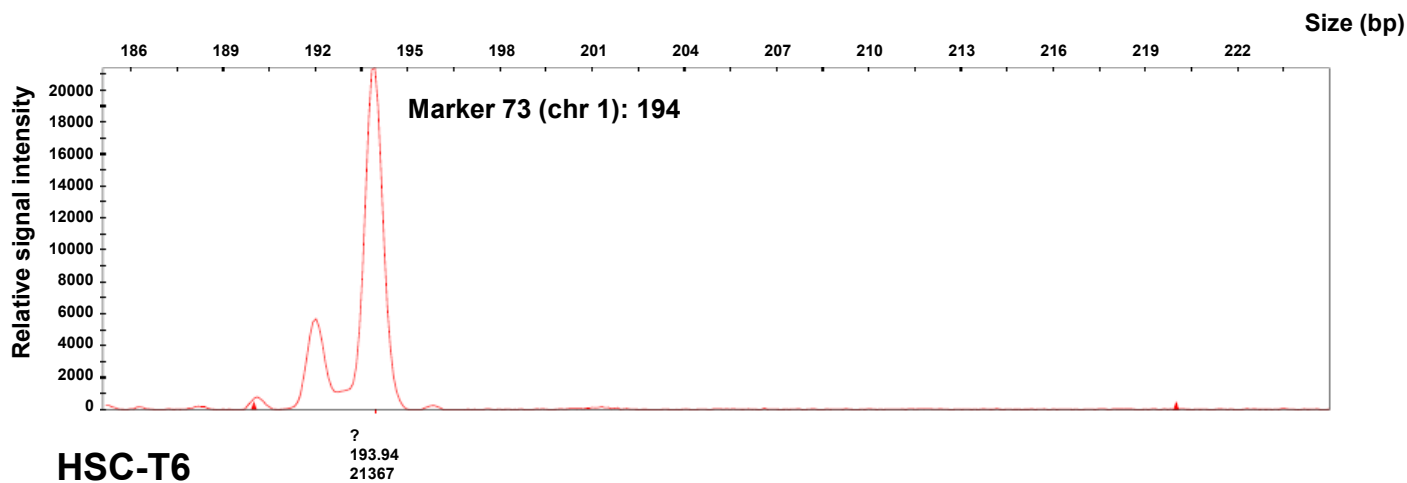

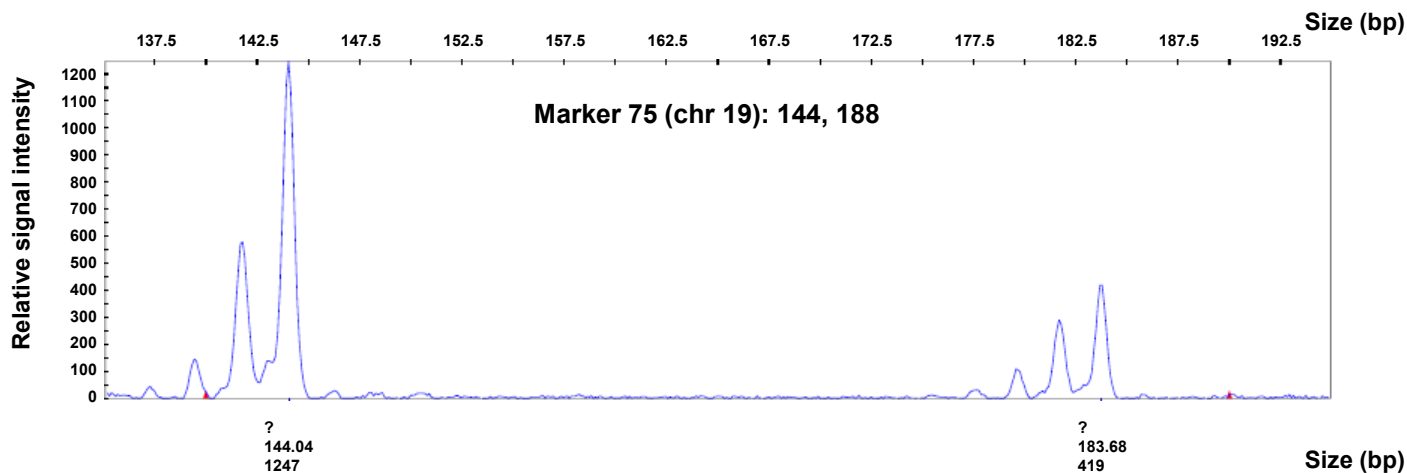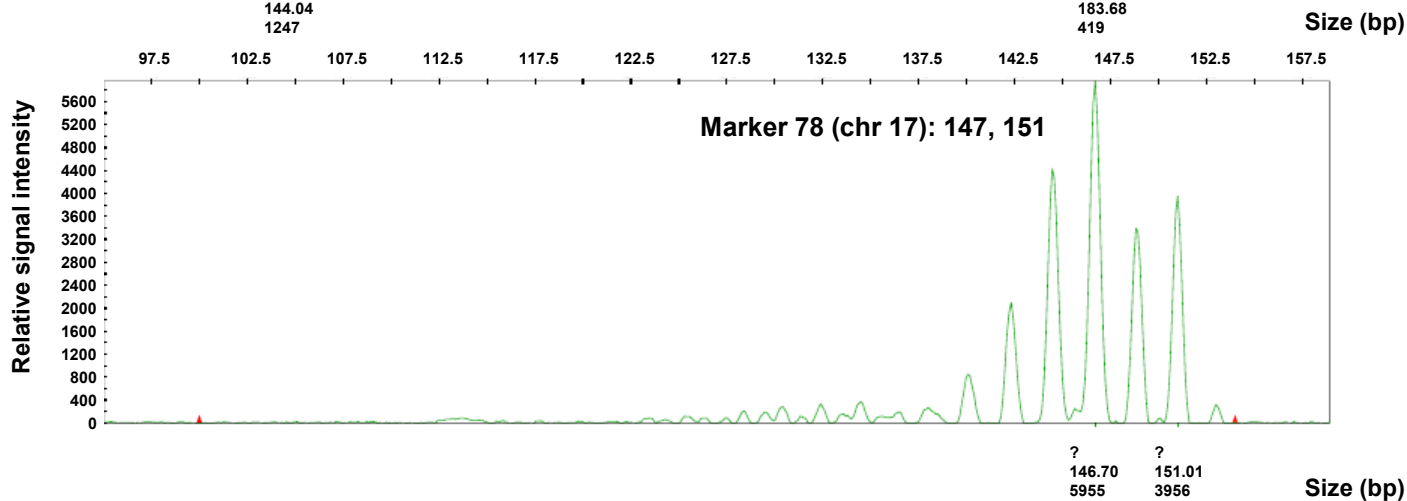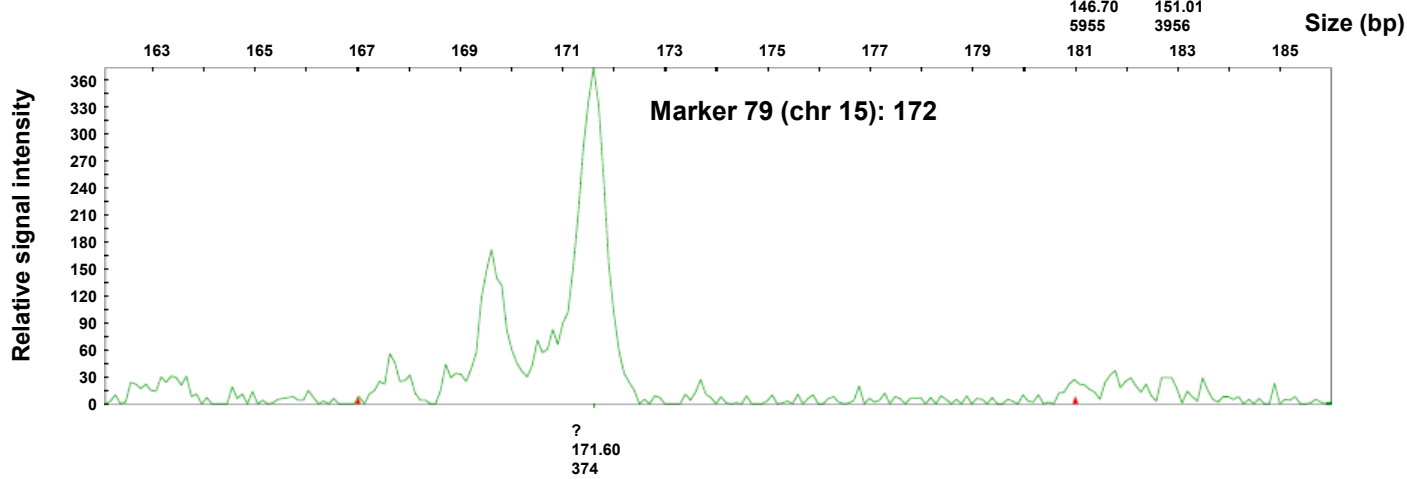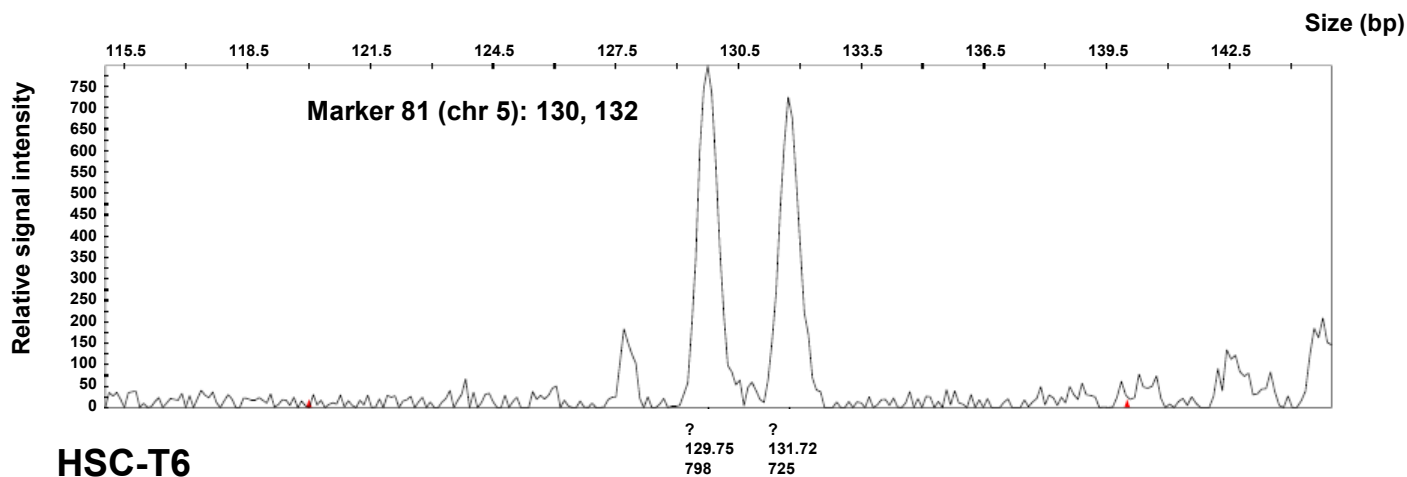

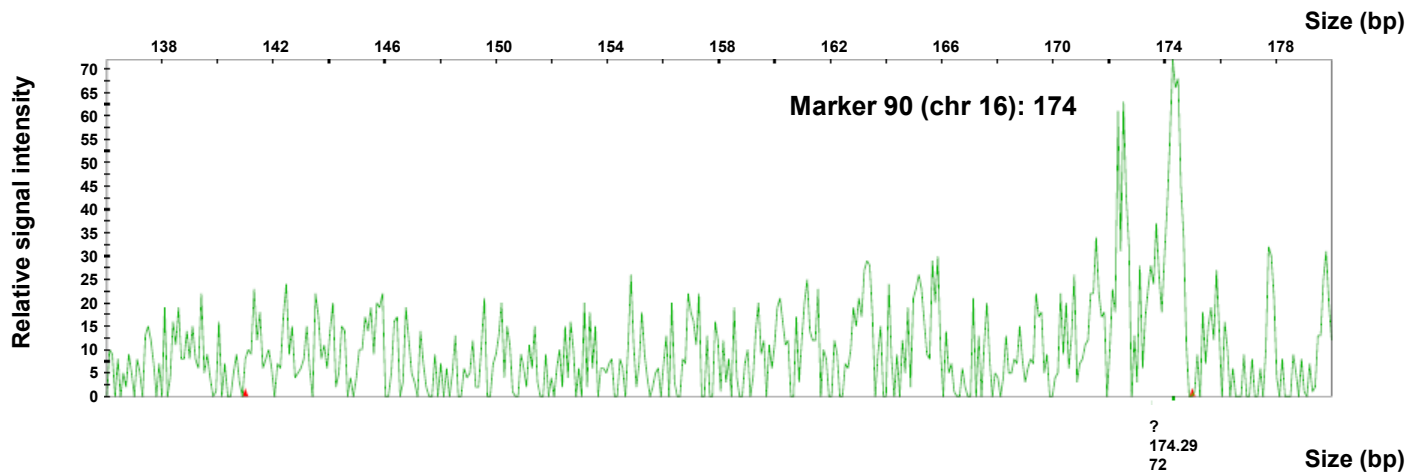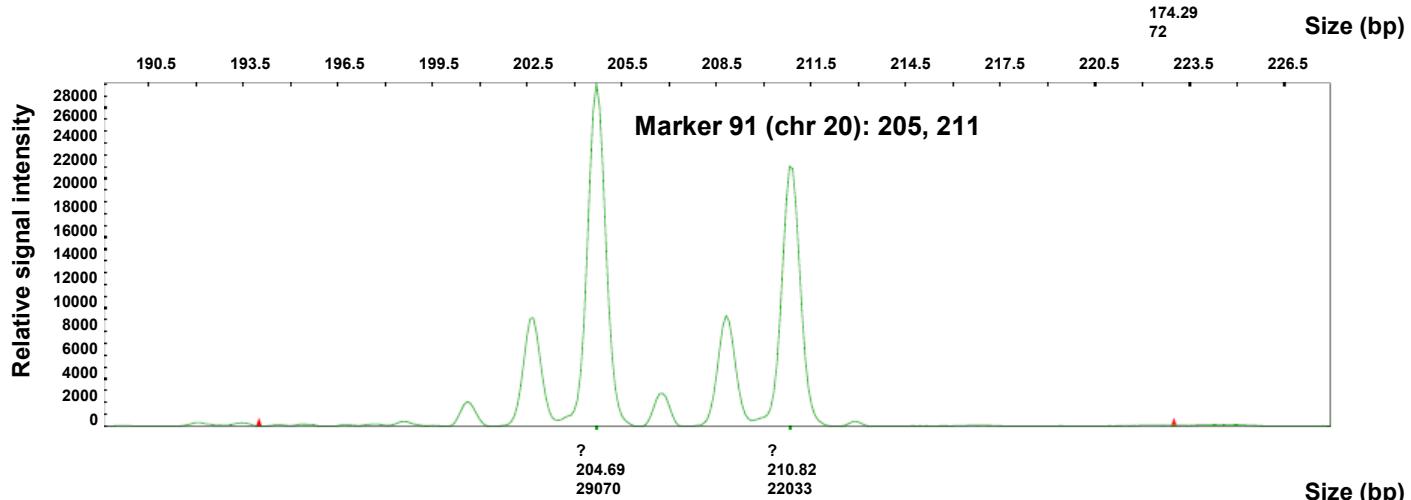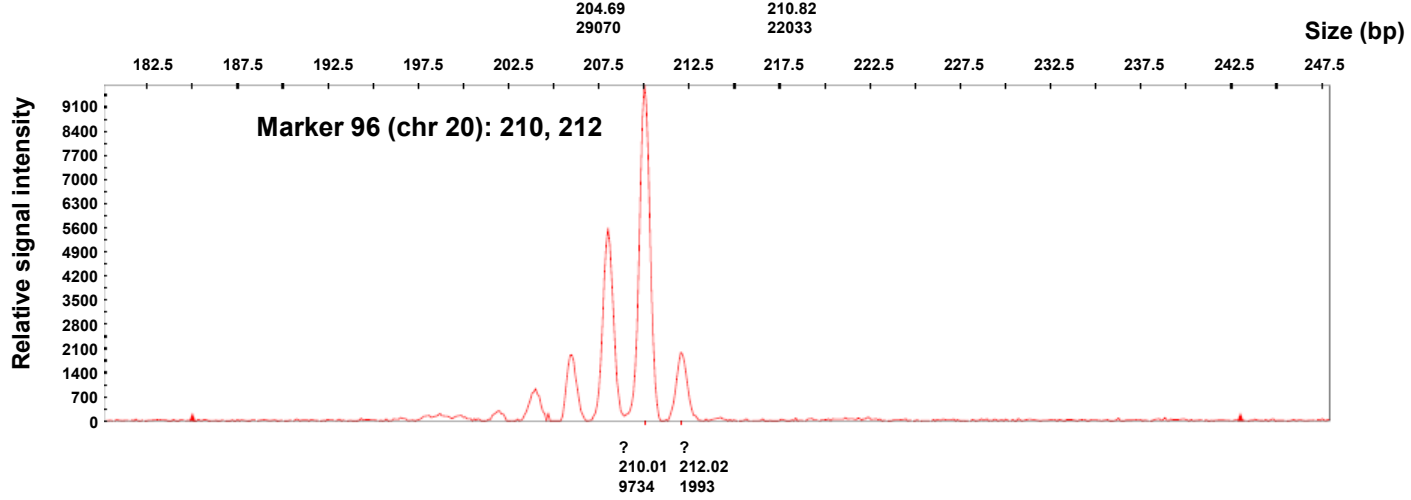

Supplement: s1 [file s1]
